# Supplementary material
Source: PubMed Central journal article supplement (PMC5032629)
Supplement: NIHMS808759-supplement-Supplementary_Table_1.pdf [file NIHMS808759-supplement-Supplementary_Table_1.pdf]

| Protein name                                                                   | Accession (IPI) | Peptide sequence              | Mascot Score | m/z      | Charge | Delta AMU  | Delta PPM | Start Residue | End Residue |
|--------------------------------------------------------------------------------|-----------------|-------------------------------|--------------|----------|--------|------------|-----------|---------------|-------------|
| <b>KMS11</b>                                                                   |                 |                               |              |          |        |            |           |               |             |
| Insulin receptor precursor                                                     | IP100025803     | DIYEIDYR                      | 14.8         | 659.2607 | 2      | 0.01055    | 8.005     | 1203          | 1211        |
| Insulin receptor precursor                                                     | IP100025803     | DIYETDYRK                     | 23.5         | 723.3039 | 2      | 0.001947   | 1.347     | 1203          | 1212        |
| Isoform 1 of Abi interactor 1                                                  | IP100431025     | NTPYKLEPKVPTVPNDYMTSPAR       | 20           | 744.8478 | 4      | 0.007663   | 2.575     | 195           | 219         |
| Isoform 1 of Abi interactor 1                                                  | IP100431025     | TLEPKVPTVPNDYMTSPAR           | 57.2         | 1,147.05 | 2      | 0.007047   | 3.073     | 200           | 219         |
| Pituitary tumor-transforming gene 1 protein-interacting protein                | IP100023974     | YGLFKEENPAR                   | 25.7         | 783.854  | 2      | 0.001847   | 1.179     | 165           | 176         |
| Tubulin-folding cofactor B                                                     | IP100293126     | LGEYEDVSR                     | 36.8         | 574.2385 | 2      | 0.002947   | 2.568     | 95            | 103         |
| Isoform 1 of Fibroblast growth factor receptor 3                               | IP100027174     | ARRPGLDySFDTCkPPEELQTFK       | 14.4         | 733.8505 | 4      | 0.009829   | 3.352     | 569           | 592         |
| Isoform 1 of Fibroblast growth factor receptor 3                               | IP100027174     | DVHNLdyYK                     | 28.7         | 623.7621 | 2      | 0.002847   | 2.284     | 641           | 649         |
| Isoform 1 of Fibroblast growth factor receptor 3                               | IP100027174     | DVHNLdyYK                     | 17.1         | 458.8755 | 3      | 0.002871   | 2.088     | 641           | 650         |
| Isoform 1 of Fibroblast growth factor receptor 3                               | IP100027174     | DVHNLdyYK                     | 16.4         | 485.5308 | 3      | 0.002439   | 1.677     | 641           | 650         |
| Isoform 1 of Fibroblast growth factor receptor 3                               | IP100027174     | MDKPAKTHDLYMIMR               | 28.5         | 692.6254 | 3      | 0.004305   | 2.074     | 713           | 728         |
| Isoform 1 of Fibroblast growth factor receptor 3                               | IP100027174     | RPGCLDySFDTCkPPEELQTFK        | 17.7         | 902.4203 | 3      | 0.01421    | 5.251     | 571           | 592         |
| ATP-dependent RNA helicase A                                                   | IP100844578     | GANKLDyYSR                    | 28           | 633.7822 | 2      | 0.005647   | 4.458     | 142           | 151         |
| Isoform 1 of Cytogen synthase kinase-3 beta                                    | IP100028570     | GEPNVSyLSR                    | 37.1         | 681.2831 | 2      | 0.003381   | 2.483     | 210           | 220         |
| Isoform 2 of Tyrosine-protein kinase JAK3                                      | IP100002773     | LLPLDKDyYVVR                  | 28.1         | 827.3905 | 2      | 0.004615   | 2.791     | 973           | 984         |
| Isoform 2 of Tyrosine-protein kinase JAK3                                      | IP100002773     | LLPLDKDyYVVR                  | 44           | 787.4051 | 2      | 0.001466   | 0.09314   | 973           | 984         |
| Transformin receptor protein 1                                                 | IP100022462     | SANFLNGEPLSyTR                | 58.5         | 913.4146 | 2      | 0.006247   | 3.421     | 7             | 22          |
| Isoform 1 of Protein CDV3 homolog                                              | IP100014197     | KTPGPPPEySDTQFSLQSTAK         | 22.9         | 867.416  | 3      | 0.005071   | 1.95      | 181           | 203         |
| Isoform 1 of Protein CDV3 homolog                                              | IP100014197     | LQLDNLyAVLENQK                | 44.8         | 878.4215 | 2      | 0.004247   | 2.419     | 238           | 251         |
| Tax_Id=9606 Gene_Symbol=CDK1 Uncharacterized protein                           | IP100985068     | IEKIGEGyGVVYK                 | 15.5         | 572.5965 | 3      | 0.005439   | 3.17      | 0             | 0           |
| Tax_Id=9606 Gene_Symbol=CDK1 Uncharacterized protein                           | IP100985068     | IEKIGEGyGVVYK                 | 22.7         | 818.4075 | 2      | 0.004547   | 2.779     | 0             | 0           |
| Tax_Id=9606 Gene_Symbol=CDK1 Uncharacterized protein                           | IP100985068     | IGEGTyGVVYK                   | 21.5         | 633.2945 | 2      | 0.0002466  | 0.1948    | 0             | 0           |
| Tax_Id=9606 Gene_Symbol=CDK1 Uncharacterized protein                           | IP100985068     | IGEGTyGVVYK                   | 24.6         | 673.2787 | 2      | 0.002315   | 1.721     | 0             | 0           |
| Tax_Id=9606 Gene_Symbol=CDK1 Uncharacterized protein                           | IP100985068     | IGEGTyGVVYKGR                 | 18.9         | 520.2294 | 3      | 0.003239   | 2.078     | 0             | 0           |
| RhoA activator C11orf59                                                        | IP100016670     | ALNGAAYHSLPSAR                | 17           | 592.9412 | 3      | 0.002571   | 1.447     | 32            | 47          |
| Isoform 1 of Lck-interacting transmembrane adapter 1                           | IP100646802     | SPEEQKQKTEVTPAAQVDVLYSR       | 46.7         | 903.4384 | 3      | 0.007671   | 2.832     | 179           | 202         |
| Isoform 1 of Lck-interacting transmembrane adapter 1                           | IP100646802     | TEVTPAAQVDVLYSR               | 34.8         | 864.9154 | 2      | 0.003047   | 1.762     | 188           | 202         |
| Isoform 1 of Dual specificity tyrosine-phosphorylation-regulated kinase 1B     | IP100000352     | IVYQYIK                       | 29.1         | 575.7697 | 2      | 0.002847   | 2.474     | 270           | 277         |
| signal transducer and activator of transcription 3 isoform 3                   | IP100412752     | LLGQGVySGQITWAK               | 50           | 972.4628 | 2      | 0.009581   | 4.929     | 532           | 548         |
| signal transducer and activator of transcription 3 isoform 3                   | IP100412752     | YGRPEQKQTEVTPAAQVDVLYSR       | 30.9         | 861.3749 | 3      | 0.008205   | 3.178     | 686           | 707         |
| Isoform 1 of Tensin-3                                                          | IP100658152     | KLSLQyDNDAGGQLPFSK            | 33.6         | 706.6696 | 3      | 0.003571   | 1.686     | 774           | 792         |
| Isoform 1 of Tensin-3                                                          | IP100658152     | KLSLQyDNDAGGQLPFSK            | 38.2         | 733.3264 | 3      | 0.007639   | 3.476     | 774           | 792         |
| Isoform 1 of Tensin-3                                                          | IP100658152     | LSSLQyDNDAGGQLPFSK            | 44.3         | 995.4556 | 2      | 0.008247   | 4.144     | 775           | 792         |
| Isoform 1 of Tensin-3                                                          | IP100658152     | QQQVMVAHQySFAQPGEAR           | 22.6         | 747.9973 | 3      | 0.002571   | 1.147     | 592           | 610         |
| Isoform 1 of T-cell-specific surface glycoprotein CD28                         | IP100022339     | LLHSyDyMNIPTTR                | 16.4         | 787.3341 | 2      | 0.006932   | 4.405     | 186           | 197         |
| Isoform 1 of T-cell-specific surface glycoprotein CD28                         | IP100022339     | LLHSyDyMNIPTTR                | 18           | 519.8923 | 3      | 0.003271   | 2.1       | 186           | 197         |
| Non-receptor tyrosine-protein kinase TYK2                                      | IP100022353     | AVPEGyYR                      | 16.4         | 650.7743 | 2      | 0.005547   | 4.265     | 1047          | 1056        |
| Isoform 2 of Plakophilin-2                                                     | IP100005264     | AHYTHSDyQYSQR                 | 31           | 579.2346 | 3      | 0.003271   | 1.884     | 159           | 171         |
| cDNA FLJ61629, highly similar to Clathrin interactor 1                         | IP100291930     | TIDLGAAYHTGDK                 | 41.8         | 756.841  | 2      | 0.001447   | 0.9563    | 284           | 297         |
| cDNA FLJ61629, highly similar to Clathrin interactor 1                         | IP100291930     | TIDLGAAYHTGDKASPDQNAHTFPQSVK  | 20.4         | 812.8785 | 4      | 0.006295   | 1.938     | 284           | 314         |
| cDNA FLJ61629, highly similar to Clathrin interactor 1                         | IP100291930     | TIDLGAAYHTGDKASPDQNAHTFPQSVK  | 48.9         | 1,110.16 | 3      | 0.007239   | 2.175     | 284           | 314         |
| cDNA FLJ61629, highly similar to Clathrin interactor 1                         | IP100291930     | ySERDYFPEK                    | 17.1         | 682.2834 | 2      | 0.002847   | 2.088     | 172           | 181         |
| Isoform 1 of Lipopolysaccharide-stimulated lipoprotein receptor                | IP100409640     | AATSGVPSYAPSTYVYK             | 16.3         | 757.0345 | 3      | -0.01129   | -0.4977   | 314           | 335         |
| Isoform 1 of Lipopolysaccharide-stimulated lipoprotein receptor                | IP100409640     | SRDPHVDYR                     | 30.5         | 694.2776 | 2      | 0.005147   | 3.079     | 546           | 555         |
| Isoform 1 of Lipopolysaccharide-stimulated lipoprotein receptor                | IP100409640     | SSSAGGQGSyVPLLR               | 49           | 779.868  | 2      | 0.002547   | 1.634     | 363           | 377         |
| Isoform 1 of Lipopolysaccharide-stimulated lipoprotein receptor                | IP100409640     | VLYWEK                        | 27.5         | 513.2252 | 2      | 0.001747   | 1.703     | 404           | 410         |
| Isoform 1 of Lipopolysaccharide-stimulated lipoprotein receptor                | IP100409640     | VLYWEKLANFDPSRPGPPSRR         | 35.2         | 676.5743 | 4      | 0.01149    | 4.252     | 404           | 426         |
| Serine/threonine-protein kinase PRK4 homolog                                   | IP100013721     | LCDFGSAHVADNDITPLVYR          | 16.4         | 839.7088 | 3      | 0.001053   | 0.04182   | 832           | 853         |
| Isoform Delta of Poliovirus receptor-related protein 1                         | IP100003648     | YDEDAKRPyFTVDEEAR             | 32.2         | 752.3282 | 3      | 0.004671   | 2.071     | 460           | 477         |
| U1 small nuclear ribonucleoprotein C                                           | IP100013396     | FyCDyDYLTHSDPSVYR             | 23.4         | 793.6423 | 3      | 0.00284    | 1.194     | 4             | 21          |
| U1 small nuclear ribonucleoprotein C                                           | IP100013396     | PKFYCDyDYLTHSDPSVYR           | 26.4         | 868.6901 | 3      | -0.00156   | -0.5991   | 2             | 21          |
| Isoform 1 of Putative adenosylhomocysteinase 2                                 | IP100182938     | EIEDEAKyFMATVTK               | 24.5         | 971.4327 | 2      | 0.002847   | 1.466     | 21            | 36          |
| Tax_Id=9606 Gene_Symbol=DERA Uncharacterized protein                           | IP100982485     | TKPTKNNQADLSWISK              | 20.7         | 669.9949 | 3      | -0.02003   | -9.975    | 0             | 0           |
| Isoform 1 of SH2 domain-containing protein 3C                                  | IP100171093     | ASPSPLSSySDPSDGHyQLQPVYR      | 36.6         | 971.426  | 3      | 0.007605   | 2.611     | 478           | 503         |
| Uncharacterized protein                                                        | IP100926916     | EPLSQSMISVWSTY                | 16.1         | 519.7111 | 4      | 0.0123     | 5.924     | 208           | 224         |
| Isoform 1 of PDZ domain-containing protein 11                                  | IP100550841     | IPYDyPVFLYFPAENPFAVWIPHER     | 52.6         | 1,059.17 | 3      | 0.001671   | 0.5261    | 5             | 30          |
| Isoform 1 of Phosphatidylinositol-3,4,5-trisphosphate 5-phosphatase 2          | IP100016932     | NSFNPPAYVLEGGVQLPPEPSPAR      | 67.5         | 1,061.85 | 3      | 0.002371   | 0.7446    | 979           | 1006        |
| Isoform 1 of Phosphatidylinositol-3,4,5-trisphosphate 5-phosphatase 2          | IP100016932     | TLSEVDYAPAGPAR                | 35.4         | 763.8495 | 2      | 0.002947   | 1.93      | 1129          | 1142        |
| Talin-1                                                                        | IP100298994     | ALDYMLR                       | 31.1         | 562.7474 | 2      | 0.002847   | 2.531     | 67            | 74          |
| Isoform 1 of Sodium-coupled neutral amino acid transporter 5                   | IP100102509     | MNGALPSDAVGRQER               | 19.9         | 615.2781 | 3      | 0.003971   | 2.153     | 8             | 23          |
| Isoform 1 of Coiled-coil domain-containing protein 50                          | IP100383423     | AYADSYVEDGGMKPR               | 22.9         | 655.9306 | 3      | 0.004671   | 2.376     | 139           | 154         |
| Isoform 1 of PDZ and LIM domain protein 5                                      | IP100007935     | YTFYVHPTSDASK                 | 23.6         | 621.2653 | 3      | 0.002071   | 1.112     | 247           | 261         |
| Isoform 1 of GRB2-associated-binding protein 1                                 | IP100031068     | DASSQDyDIPR                   | 33.9         | 753.7845 | 2      | 0.004881   | 3.24      | 399           | 410         |
| Isoform 2 of Homeodomain-interacting protein kinase 2                          | IP100215949     | AVCSYLYQSR                    | 34.6         | 632.774  | 2      | 0.001581   | 1.25      | 356           | 365         |
| Isoform 1 of Disintegrin and metalloproteinase domain-containing protein 9     | IP100440932     | FAPVYAAK                      | 46.2         | 524.2508 | 2      | 0.003247   | 3.099     | 773           | 781         |
| Isoform p59-HCK of Tyrosine-protein kinase HCK                                 | IP100029769     | VIEDNEYAR                     | 30           | 645.2745 | 2      | 0.0007466  | 0.5789    | 384           | 393         |
| Isoform 3 of Drebrin-like protein                                              | IP100101968     | FQDVGQAPVGSyVYK               | 43.9         | 900.4243 | 2      | 0.004747   | 2.637     | 149           | 164         |
| Mitogen-activated protein kinase 3                                             | IP100018195     | IADPEHDHGLFTYVATR             | 45.3         | 751.3408 | 3      | 0.005671   | 2.518     | 190           | 208         |
| Gap junction alpha-1 protein                                                   | IP100218487     | QASEQNWAYSAEQYR               | 63.7         | 988.4034 | 2      | 0.006647   | 3.364     | 304           | 319         |
| Gap Junction alpha-1 protein                                                   | IP100218487     | SDPYHATSGALSPAK               | 34.5         | 791.3525 | 2      | 0.003147   | 1.989     | 244           | 258         |
| Isoform 5 of Fibroblast growth factor receptor 2                               | IP100216602     | DINNDYIK                      | 21           | 683.3097 | 2      | 0.003347   | 2.451     | 648           | 657         |
| Isoform 1 of PDZ and LIM domain protein 3                                      | IP100004471     | TKPREGYDVTLYPKA               | 24.2         | 620.6348 | 3      | 0.006871   | 3.694     | 349           | 364         |
| Discoidin, CUB and LCCL domain-containing protein 1                            | IP100337612     | AGRHEyALPLAPEPEyATPIVER       | 30.5         | 946.1107 | 3      | 0.006639   | 2.341     | 584           | 607         |
| Discoidin, CUB and LCCL domain-containing protein 1                            | IP100337612     | AVSALATESGHDPQKPPHTGSDSYSPAR  | 29.9         | 807.8714 | 4      | 0.004195   | 1.299     | 670           | 700         |
| Isoform APP770 of Amyloid beta A4 protein (Fragment)                           | IP100006608     | MQQGyENPYK                    | 32.5         | 776.8118 | 2      | 0.002447   | 1.576     | 752           | 763         |
| Low-density lipoprotein receptor                                               | IP100000070     | TTEDEHICHNQDyGSYPSR           | 26.2         | 830.0023 | 3      | 0.005105   | 2.052     | 831           | 850         |
| Tyrosine-protein kinase Sgk223                                                 | IP100739386     | EATQPEPYAESTK                 | 14.5         | 822.3661 | 2      | 0.004747   | 2.888     | 405           | 418         |
| Cell division protein kinase 3                                                 | IP100023503     | VEKIGEGyGVVYK                 | 27           | 567.9233 | 3      | 0.001539   | 0.9044    | 35            | 48          |
| Cell division protein kinase 3                                                 | IP100023503     | VEKIGEGyGVVYK                 | 17.2         | 541.2684 | 3      | 0.003171   | 1.955     | 35            | 48          |
| Isoform 1 of Hepatocyte growth factor-regulated tyrosine kinase substrate      | IP100006176     | NYWEK                         | 17.5         | 410.1581 | 2      | 0.001647   | 2.01      | 333           | 337         |
| Isoform 1 of Hepatocyte growth factor-regulated tyrosine kinase substrate      | IP100006176     | YLNRNyWEK                     | 20.4         | 455.8718 | 3      | 0.002171   | 1.589     | 329           | 337         |
| Isoform 1 of Protein phosphatase 1 regulatory subunit 12A                      | IP100183002     | SGSYLEER                      | 28.9         | 635.7546 | 2      | 0.003247   | 2.555     | 908           | 917         |
| Isoform 1 of 1-phosphatidylinositol-4,5-bisphosphate phosphodiesterase gamma-1 | IP100016736     | AQyRDMSSFPETK                 | 20           | 557.8909 | 3      | 0.003805   | 2.279     | 975           | 987         |
| tyrosine-protein phosphatase non-receptor type 18 isoform 2                    | IP100152019     | SAEEAPLYSK                    | 25.9         | 587.7565 | 2      | 0.002947   | 2.509     | 275           | 284         |
| SHC-transforming protein 1 isoform 3                                           | IP100021326     | ELFDDPSyVNWQNLDK              | 59.8         | 988.442  | 2      | 0.008047   | 4.072     | 421           | 436         |
| SHC-transforming protein 1 isoform 3                                           | IP100021326     | ELFDDPSyVNWQNLDKAR            | 19.9         | 735.0097 | 3      | 0.007671   | 3.482     | 421           | 438         |
| Putative uncharacterized protein DKFZp666K14185                                | IP100470878     | EPGRPTPHVHLVNTSQSQVEEDVSSPPQR | 36.5         | 1,138.20 | 3      | 0.01367    | 4.006     | 5             | 34          |
| Isoform 2 of Catenin delta-2                                                   | IP100220032     | LVGSIK                        | 17.4         | 456.2517 | 2      | -0.0001534 | -0.1683   | 932           | 939         |
| SH2 domain-containing protein 4A                                               | IP100100731     | SQyHDLQPDNQYK                 | 27.5         | 618.2687 | 3      | 0.005171   | 2.791     | 129           | 143         |
| SH2 domain-containing protein 4A                                               | IP100100731     | TKyQYHDLQPDNQYK               | 26.4         | 694.6505 | 3      | 0.007871   | 3.78      | 127           | 143         |
| Sodium/hydrogen exchanger 9                                                    | IP100216972     | ASPTQPKENyEGDGLGGYELK         | 22.2         | 872.7479 | 3      | 0.005771   | 2.206     | 611           | 634         |
| Ribosomal protein S6 kinase alpha-3                                            | IP100020898     | GAMAATySALNR                  | 46.4         | 653.2875 | 2      | 0.002047   | 1.568     | 701           | 712         |
| Calmodulin                                                                     | IP100075248     | VFDKDGNGyISAEALR              | 27.3         | 612.2848 | 3      | 0.002571   | 1.401     | 92            | 107         |

|                                                                                      |             |                               |      |          |   |           |        |      |      |
|--------------------------------------------------------------------------------------|-------------|-------------------------------|------|----------|---|-----------|--------|------|------|
| Isomorf A1 of Tight junction protein ZO-2                                            | IP10003843  | IEIAQHPDIAVPIK                | 19   | 639.0101 | 3 | 0.006571  | 3.431  | 1108 | 1123 |
| Isomorf Del-701 of Signal transducer and activator of transcription 3                | IP100306436 | YCRPSEQHEPADGGAAPYLK          | 18.2 | 832.3636 | 3 | 0.006305  | 2.527  | 686  | 706  |
| V-type proton ATPase subunit E 1                                                     | IP100003856 | IMSYEYK                       | 22.8 | 592.2617 | 2 | 0.005547  | 4.687  | 53   | 60   |
| Isomorf 1 of Secretory carrier-associated membrane protein 1                         | IP100005129 | MPNVNTQPAIMKTEHPAQTQAK        | 33.2 | 747.3629 | 4 | 0.009195  | 3.079  | 53   | 78   |
| Ribosomal protein S27                                                                | IP100397358 | LVQSPNRYFMDVK                 | 48.5 | 804.3648 | 2 | 0.004747  | 2.952  | 88   | 100  |
| Syndecan-1                                                                           | IP100002441 | QANGGAYQKPTQEEFYA             | 22   | 703.9826 | 3 | 0.005371  | 2.545  | 293  | 310  |
| Maternal embryonic leucine zipper kinase                                             | IP100006471 | SAVKNEEYFMPEPK                | 34.5 | 948.4143 | 2 | -0.007253 | -3.826 | 431  | 445  |
| Mitogen-activated protein kinase 1                                                   | IP100003479 | VADPDHDTGLLEIVATR             | 21.1 | 768.6498 | 3 | -0.002361 | -1.025 | 173  | 191  |
| Mitogen-activated protein kinase 1                                                   | IP100003479 | VADPDHDTGLLEIVATR             | 42.5 | 741.998  | 3 | 0.008571  | 3.854  | 173  | 191  |
| Cell division protein kinase 5                                                       | IP100023530 | IGEGTYGVFK                    | 25.3 | 626.2886 | 2 | 0.004047  | 3.233  | 10   | 20   |
| Docking protein 2                                                                    | IP100022602 | GQEQEYAVPDAVAR                | 28.5 | 844.8716 | 2 | 0.004247  | 2.515  | 294  | 308  |
| Isomorf 2 of Leukocyte-associated immunoglobulin-like receptor 1                     | IP100028015 | AVSPQSTKPMASSTYAAVAR          | 33   | 753.3702 | 3 | 0.007371  | 3.264  | 249  | 269  |
| Isomorf 2 of Leukocyte-associated immunoglobulin-like receptor 1                     | IP100028015 | AVSPQSTKPMASSTYAAVARH         | 28.5 | 799.0558 | 3 | 0.005271  | 2.201  | 249  | 270  |
| Desmoglein-2                                                                         | IP100028931 | VIQPHGGGNSPLEGTQLQVQYVMHR     | 21.9 | 752.8688 | 4 | 0.008195  | 2.724  | 991  | 1017 |
| Transgelin-2                                                                         | IP100050363 | GASQAGMTGYGMPR                | 49.2 | 732.2958 | 2 | 0.003447  | 2.355  | 183  | 196  |
| Isomorf Beta-1A of Integrin beta-1                                                   | IP100217563 | WDTGENPIYK                    | 31.6 | 651.7764 | 2 | 0.005147  | 3.951  | 775  | 784  |
| Isomorf 1 of Glucocorticoid receptor DNA-binding factor 1                            | IP100334715 | NEEENYVSPHDSQTKG              | 29.2 | 676.2858 | 3 | 0.003771  | 1.86   | 1099 | 1115 |
| Isomorf B of Membrane cofactor protein                                               | IP100219852 | ADGGEAYATYQTK                 | 23.3 | 727.799  | 2 | 0.007047  | 4.844  | 378  | 390  |
| ATP-dependent RNA helicase DDX3X                                                     | IP100215637 | DKDAYSFGRS                    | 21.4 | 656.7653 | 2 | 0.002747  | 2.093  | 65   | 75   |
| Isomorf 1 of Signal transducing adapter molecule 2                                   | IP100290542 | LVNEAPVSYYSK                  | 24.7 | 774.8728 | 2 | 0.003847  | 2.484  | 364  | 376  |
| Isomorf 1 of Signal transducing adapter molecule 2                                   | IP100290542 | SLYPSSEQLNKK                  | 31.3 | 786.8699 | 2 | 0.001947  | 1.238  | 190  | 202  |
| Isomorf 1 of Septin-2                                                                | IP100014177 | QQPTQINPTEPGVYGFANLNQVHR      | 62.5 | 1,011.49 | 3 | 0.004771  | 1.573  | 4    | 29   |
| two pore calcium channel protein 1 isomorf 1                                         | IP100164366 | ELKPEITSSPGYHILR              | 21.3 | 640.6605 | 3 | 0.004071  | 2.12   | 51   | 66   |
| Ataxin-1-like                                                                        | IP100900336 | MPYIYQMSR                     | 30.5 | 634.7661 | 2 | 0.004547  | 3.584  | 227  | 235  |
| Isomorf 1 of Disks large homolog 3                                                   | IP100023343 | RDNVEDDQDHYHVVSR              | 28.7 | 672.6263 | 3 | 0.003571  | 1.771  | 664  | 679  |
| Tyrosine-protein kinase JAK1                                                         | IP100784013 | ALETDEYTYTK                   | 26   | 770.3542 | 2 | 0.003147  | 2.044  | 1027 | 1038 |
| Isomorf 1 of Protein LAP2                                                            | IP100438286 | TMSVSDPIYR                    | 40.4 | 693.7745 | 2 | 0.002247  | 1.62   | 1156 | 1166 |
| Isomorf Alpha of Caveolin-1                                                          | IP100009236 | YVDEGHLVTPVR                  | 44.3 | 864.9001 | 2 | -0.006453 | -3.733 | 6    | 19   |
| Isomorf 1 of Protein LAP2                                                            | IP100438286 | RAQIPEGDLYSR                  | 23.4 | 824.3785 | 2 | -0.003053 | -1.853 | 1096 | 1108 |
| cDNA FLJ54492, highly similar to Eukaryotic translation initiation factor 4B         | IP100012079 | DDYSDIDYR                     | 25.6 | 642.7282 | 2 | -0.003853 | -3     | 314  | 322  |
| Insulin receptor precursor                                                           | IP100025803 | DIYETDYRK                     | 27.3 | 763.2833 | 2 | -0.005885 | -3.661 | 1203 | 1212 |
| Insulin receptor precursor                                                           | IP100025803 | SYEEHPHYHMGGK                 | 22.8 | 641.575  | 3 | -0.007661 | -3.984 | 1374 | 1388 |
| Insulin receptor precursor                                                           | IP100025803 | sYEEHPHYHMGGK                 | 27.3 | 684.2745 | 3 | -0.004161 | -2.029 | 1374 | 1389 |
| Isomorf 1 of Large neutral amino acids transporter small subunit 3                   | IP100021075 | VDGLFVTHYTTMGQR               | 56.3 | 953.4275 | 2 | -0.008953 | -4.698 | 245  | 260  |
| Pyruvate dehydrogenase E1 component subunit alpha, testis-specific form, mitochondri | IP100024087 | YHGSHMSDPGVSYR                | 38.7 | 558.2217 | 3 | -0.006829 | -4.083 | 287  | 300  |
| ATP-dependent RNA helicase DDX3X                                                     | IP100215637 | GRSDYDGGSR                    | 27.7 | 631.759  | 2 | -0.005553 | -4.399 | 100  | 110  |
| ATP-dependent RNA helicase DDX3X                                                     | IP100215637 | SDYDGGSR                      | 40.7 | 525.1984 | 2 | -0.004153 | -3.958 | 102  | 110  |
| Isomorf 2 of Leucyl-cystinyl aminopeptidase                                          | IP100221240 | GLGHEHEDEEEDYESSAK            | 16.4 | 755.2767 | 3 | -0.006729 | -2.973 | 43   | 61   |
| Elongation factor 1-alpha 1                                                          | IP100396485 | EHALLAYLGVK                   | 32.1 | 697.8557 | 2 | -0.003953 | -2.835 | 135  | 146  |
| Isomorf B of Syntaxin-16                                                             | IP100023149 | SQHFFDTSVPLMDDGDNTLVR         | 64.9 | 930.7194 | 3 | -0.006829 | -2.448 | 194  | 216  |
| Isomorf Long of Vacuolar protein sorting-associated protein 41 homolog               | IP100028051 | KILVADLSLLK                   | 18.9 | 730.3862 | 2 | 0.007615  | 5.217  | 762  | 773  |
| Protein phosphatase 1 regulatory subunit 11                                          | IP100030355 | cclyEKPR                      | 17.3 | 455.8412 | 3 | -0.006025 | -4.413 | 60   | 68   |
| Lysosomal-associated transmembrane protein 4A                                        | IP100014172 | MPEKEPPPPYLA                  | 20.4 | 773.355  | 2 | -0.003453 | -2.234 | 221  | 233  |
| Arf-GAP with coiled-coil, ANK repeat and PH domain-containing protein 2              | IP100014264 | ESEGLYQCPDQYQDIFR             | 48.4 | 1,142.47 | 2 | -0.005753 | -2.519 | 737  | 755  |
| Isomorf 1 of Zinc finger protein 598                                                 | IP100328737 | RNEGVMGDEYEEVDOR              | 46.8 | 951.8932 | 2 | -0.007553 | -3.97  | 296  | 311  |
| Ephrin-B1                                                                            | IP100024307 | TENNYCPHYEK                   | 27.4 | 858.2919 | 2 | -0.004337 | -2.536 | 308  | 319  |
| Bone marrow stromal antigen 2                                                        | IP100026241 | ASTSYDYCR                     | 18.4 | 641.6946 | 2 | -0.00275  | -2.145 | 2    | 10   |
| Bone marrow stromal antigen 2                                                        | IP100026241 | ASTSYDYCR                     | 20.3 | 601.7104 | 2 | -0.004819 | -4.008 | 2    | 10   |
| Uncharacterized protein                                                              | IP100893901 | QSPHDEDPQAVIYAPVK             | 31.8 | 654.6237 | 3 | -0.007729 | -3.94  | 543  | 559  |
| Isomorf B of Membrane cofactor protein                                               | IP100219852 | ADGGEAYATYQTK                 | 43.2 | 767.7764 | 2 | -0.004485 | -2.923 | 378  | 390  |
| Isomorf B of Membrane cofactor protein                                               | IP100219852 | GKADGGEAYATYQTK               | 41.9 | 547.2362 | 3 | -0.006129 | -3.738 | 376  | 390  |
| Isomorf B of Membrane cofactor protein                                               | IP100219852 | GKADGGEAYATYQTK               | 65.3 | 860.3342 | 2 | -0.005385 | -3.131 | 376  | 390  |
| Isomorf 1 of Receptor-interacting serine/threonine-protein kinase 2                  | IP100021917 | KADQCYFMK                     | 20.4 | 635.7521 | 2 | -0.002819 | -2.219 | 376  | 384  |
| Uncharacterized protein                                                              | IP100103018 | NEGFYADPILYHEGR               | 25.6 | 637.594  | 3 | -0.007129 | -3.731 | 389  | 403  |
| Isomorf 1 of Gamma-secretase subunit APH-1A                                          | IP100059964 | VMVYSALR                      | 23.9 | 509.7419 | 2 | -0.002553 | -2.507 | 253  | 260  |
| Claudin-3                                                                            | IP100007364 | VVYSAPR                       | 21.5 | 436.2057 | 2 | -0.003153 | -3.619 | 196  | 202  |
| Isomorf 2 of Plakophilin-2                                                           | IP100005264 | AGTTATVEGR                    | 46.8 | 553.7274 | 2 | -0.003953 | -3.573 | 113  | 122  |
| Isomorf 2 of Plakophilin-2                                                           | IP100005264 | AHYTHSDYQYSQR                 | 19   | 605.8875 | 3 | -0.004361 | -2.402 | 159  | 171  |
| Isomorf 2 of Plakophilin-2                                                           | IP100005264 | GTAQYSSQKSVVER                | 32.9 | 865.3427 | 2 | -0.004885 | -2.824 | 126  | 139  |
| Isomorf 2 of Plakophilin-2                                                           | IP100005264 | HFDTYHR                       | 19.2 | 528.2065 | 2 | -0.003753 | -3.556 | 213  | 219  |
| Isomorf 2 of Plakophilin-2                                                           | IP100005264 | TYDMLK                        | 22   | 425.6721 | 2 | -0.004853 | -3.708 | 107  | 112  |
| Isomorf GN-1L of Glycogenin-1                                                        | IP100180386 | WEQQAQDYMAGDSFDNIKR           | 28.8 | 770.9847 | 3 | -0.009229 | -3.994 | 325  | 343  |
| Teneurin-3                                                                           | IP100398020 | TGTTTFLFSTATPGYTMASGVSPPTPLPR | 58   | 1,150.55 | 3 | -0.006629 | -1.922 | 256  | 288  |
| Neutral amino acid transporter B(0)                                                  | IP100019472 | HYRGPAGDAVASEK                | 42.3 | 546.9103 | 3 | -0.01093  | -6.67  | 523  | 537  |
| Isomorf 1 of Secretory carrier-associated membrane protein 3                         | IP100306382 | NYGSYSTQASAAAATAELK           | 109  | 1,048.98 | 2 | -0.004853 | -2.315 | 82   | 101  |
| Leupaxin                                                                             | IP100299066 | STLQDSDYENPAPFLDQHSR          | 30.7 | 850.7075 | 3 | -0.006729 | -2.639 | 14   | 35   |
| Hematopoietic lineage cell-specific protein                                          | IP100026156 | GFGQYQYQK                     | 40.1 | 567.7508 | 2 | -0.003853 | -3.397 | 193  | 202  |
| Isomorf A1 of Tight junction protein ZO-2                                            | IP100003843 | HPDIYAVPIK                    | 22.1 | 616.8055 | 2 | -0.003953 | -3.207 | 1114 | 1123 |
| Isomorf 1A of Tyrosine-protein kinase ABL1                                           | IP100216969 | LMTDQYTAHAGAK                 | 17.8 | 506.2187 | 3 | -0.008829 | -5.822 | 387  | 400  |
| Isomorf 1 of Band 4.1-like protein 1                                                 | IP100024062 | AVVYRETPSPPEER                | 21.1 | 576.5906 | 3 | -0.006429 | -3.721 | 861  | 874  |
| Isomorf Long of Eukaryotic translation initiation factor 4H                          | IP100014263 | AYSFFGGGR                     | 28.8 | 491.1933 | 2 | -0.003253 | -3.315 | 11   | 19   |
| Isomorf 2 of Suppressor of G2 allele of SKP1 homolog                                 | IP100791573 | LFQYISDGSDEVKR                | 32.4 | 622.285  | 3 | -0.007429 | -3.984 | 280  | 294  |
| Activated CDC42 kinase 1                                                             | IP100552750 | KPTYDPVSEDQDPLSSDFKR          | 22.9 | 802.0267 | 3 | -0.005229 | -2.175 | 571  | 590  |
| Isomorf 1 of Melanoma-associated antigen D1                                          | IP100328254 | GPNCVYDFSQAHNAK               | 32.3 | 562.2399 | 3 | -0.006429 | -3.816 | 87   | 101  |
| Fas apoptotic inhibitory molecule 3                                                  | IP100023119 | SQNNIYSAQPR                   | 33.8 | 695.2829 | 2 | -0.003119 | -2.244 | 310  | 320  |
| Isomorf 1 of Protein-tyrosine kinase 2-beta                                          | IP100029702 | YIEDEDYKASVTR                 | 19.2 | 956.3723 | 2 | -0.007685 | -4.02  | 573  | 586  |
| Isomorf 1 of Protein-tyrosine kinase 2-beta                                          | IP100029702 | YIEDEDYKASVTR                 | 62.2 | 916.3903 | 2 | -0.005353 | -2.923 | 573  | 586  |
| Isomorf 1 of Sodium-coupled neutral amino acid transporter 2                         | IP100410034 | sHYADVDPENQNFLESNLGK          | 31.7 | 824.0334 | 3 | -0.006729 | -2.724 | 39   | 59   |
| Isomorf 1 of Sodium-coupled neutral amino acid transporter 2                         | IP100410034 | SHYADVDPENQNFLESNLGK          | 41.9 | 866.7313 | 3 | -0.008029 | -3.09  | 39   | 60   |
| Isomorf 1 of Myotubularin-related protein 10                                         | IP100719173 | SGPLEACYGELGQSR               | 70.9 | 852.356  | 2 | -0.004919 | -2.887 | 701  | 715  |
| Isomorf p59-HCK of Tyrosine-protein kinase HCK                                       | IP100029769 | VIEDNEYTAREGAK                | 27.6 | 837.869  | 2 | -0.006453 | -3.853 | 384  | 397  |
| Junctional adhesion molecule A                                                       | IP100001754 | KVIYSQPSAR                    | 23.4 | 654.7891 | 2 | -0.003985 | -3.045 | 277  | 286  |
| Junctional adhesion molecule A                                                       | IP100001754 | KVIYSQPSAR                    | 25.4 | 614.8058 | 2 | -0.004253 | -3.462 | 277  | 286  |
| Junctional adhesion molecule A                                                       | IP100001754 | VIYSQPSAR                     | 18.1 | 590.7405 | 2 | -0.006185 | -5.239 | 278  | 286  |
| Junctional adhesion molecule A                                                       | IP100001754 | VIYSQPSAR                     | 35   | 550.759  | 2 | -0.002853 | -2.593 | 278  | 286  |
| Proto-oncogene tyrosine-protein kinase Yes                                           | IP100013981 | LIEDNEYTAR                    | 35.2 | 652.279  | 2 | -0.005953 | -4.567 | 420  | 429  |
| cDNA FLJ5986                                                                         | IP100004958 | TKGDEEYWNSSK                  | 34.4 | 826.8245 | 2 | -0.005953 | -3.602 | 30   | 42   |
| breast cancer anti-estrogen resistance protein 1 isomorf 5                           | IP100641339 | GLLPSQYQGVYDTPMVK             | 39.8 | 1,137.03 | 2 | -0.005553 | -2.443 | 256  | 275  |
| breast cancer anti-estrogen resistance protein 1 isomorf 5                           | IP100641339 | HLLPAGQQDQYVPPVR              | 19.7 | 656.3295 | 3 | -0.005029 | -2.557 | 239  | 255  |
| Isomorf Long of Plakophilin-4                                                        | IP100021076 | LQHQQYYSQDQSNK                | 22.9 | 701.6461 | 3 | -0.005529 | -2.629 | 1109 | 1124 |
| Isomorf Long of Plakophilin-4                                                        | IP100021076 | NNYALNTTAYAEPPRIQYR           | 21.4 | 893.725  | 3 | -0.003561 | -1.329 | 468  | 488  |
| Isomorf Long of Plakophilin-4                                                        | IP100021076 | NNYALNTTAYAEPPRIQYR           | 35.8 | 867.0684 | 3 | -0.007029 | -2.704 | 468  | 488  |
| Isomorf Long of Plakophilin-4                                                        | IP100021076 | SAVSPDLHTPIYEGR               | 41.4 | 917.9415 | 2 | 0.002047  | 1.115  | 403  | 418  |
| Isomorf Long of Plakophilin-4                                                        | IP100021076 | TYSPYVTR                      | 14.9 | 564.741  | 2 | -0.001353 | -1.199 | 419  | 426  |
| Transgelin-2                                                                         | IP100550363 | GPAYGLSR                      | 24.9 | 450.7009 | 2 | -0.003053 | -3.391 | 5    | 12   |

|                                                                                             |             |                                 |      |          |   |           |        |      |      |
|---------------------------------------------------------------------------------------------|-------------|---------------------------------|------|----------|---|-----------|--------|------|------|
| Insulin receptor substrate 2 Insertion mutant (Fragment)                                    | IP00464978  | VAYHPYEDYDIEIGSHR               | 40.2 | 766.6637 | 3 | -0.009929 | -4.321 | 625  | 643  |
| Isomorf 1 of Pleckstrin homology domain-containing family A member 7                        | IP00419933  | QGRGQSLSPENYQLPK                | 32.8 | 1,035.98 | 2 | -0.006753 | -3.261 | 458  | 475  |
| Neutral amino acid transporter A                                                            | IP00015476  | SNETNGVLDLQAQAGPAGPAAAGR        | 69.7 | 1,319.57 | 2 | -0.01645  | -6.237 | 4    | 31   |
| Isomorf 1 of Scavenger receptor class B member 1                                            | IP00177968  | DKEAIQAYSESLMSTAPK              | 19.6 | 683.6456 | 3 | -0.002529 | -1.235 | 483  | 500  |
| Heterogeneous nuclear ribonucleoprotein H                                                   | IP00013881  | DLNycFSGMSDHR                   | 46.8 | 841.3076 | 2 | -0.005619 | -3.341 | 263  | 275  |
| dynactin subunit 2                                                                          | IP00220503  | TGYESGEMVLGEGLVK                | 48.6 | 999.9192 | 2 | -0.009353 | -4.679 | 84   | 101  |
| Isomorf CSBP2 of Mitogen-activated protein kinase 14                                        | IP00002857  | HTDDDMGVYATR                    | 42.2 | 788.3083 | 2 | -0.005353 | -3.398 | 174  | 186  |
| Tyrosine-protein kinase Fer                                                                 | IP00029263  | QEDGGVYSSGLK                    | 70.8 | 703.7927 | 2 | -0.005553 | -3.948 | 708  | 720  |
| Isomorf 1 of 1-phosphatidylinositol-4,5-bisphosphate phosphodiesterase gamma-1              | IP00016736  | IGTAEFDYALYEGR                  | 32.4 | 846.3663 | 2 | -0.006153 | -3.637 | 764  | 778  |
| Isomorf 2 of Rho GTPase-activating protein 30                                               | IP00376321  | TQTCTEGGDYELPR                  | 32.2 | 925.875  | 2 | -0.002484 | -1.342 | 807  | 821  |
| Transmembrane protein 106B                                                                  | IP00235903  | NGDVSQFPYVEFTGR                 | 42   | 898.2868 | 2 | -0.002453 | -1.366 | 42   | 56   |
| Isomorf 1 of Ankyrin-like protein 2                                                         | IP00031030  | MQNHGVENPTYK                    | 38.7 | 781.3086 | 2 | -0.004253 | -2.724 | 745  | 756  |
| Isomorf 1 of Roundabout homolog 1                                                           | IP00219798  | NLGTSTYAGIR                     | 40   | 616.7848 | 2 | -0.004853 | -3.938 | 926  | 936  |
| Isomorf 1 of Roundabout homolog 1                                                           | IP00219798  | QEVAVPQYVIVEQNK                 | 50.8 | 919.934  | 2 | -0.007753 | -4.216 | 1107 | 1121 |
| Isomorf 2 of Phosphatidylinositol-4-phosphate 5-kinase type-1 alpha                         | IP00022149  | EPLSSETQYSDVTR                  | 33   | 846.3575 | 2 | -0.008353 | -4.938 | 325  | 338  |
| Isomorf 2 of Phosphatidylinositol-4-phosphate 5-kinase type-1 alpha                         | IP00022149  | RPMASEVYASGMPIKK                | 22.2 | 647.9796 | 3 | -0.008529 | -4.392 | 34   | 50   |
| Src substrate cortactin                                                                     | IP00029601  | GPVSTGEPYVSMEEAYR               | 55.1 | 1,117.97 | 2 | -0.004553 | -2.037 | 435  | 454  |
| Src substrate cortactin                                                                     | IP00029601  | TQTPVSPAPQTEERLPSVYEDAAAFK      | 35.2 | 1,102.86 | 3 | -0.006429 | -1.944 | 399  | 428  |
| Src substrate cortactin                                                                     | IP00029601  | TQTPVSPAPQTEERLPSVYEDAAAFK      | 47.4 | 1,129.51 | 3 | -0.007761 | -2.292 | 399  | 428  |
| Cytokine receptor common subunit gamma                                                      | IP00012899  | GGALGEGGASPCNQHSPYWAPPCTYLPKET  | 48.2 | 1,127.15 | 3 | -0.00776  | -2.296 | 339  | 369  |
| Carboxypeptidase D                                                                          | IP00027078  | SLLSHEFDQTEDEETLYSSHK           | 57.4 | 935.7292 | 3 | -0.004629 | -1.65  | 1358 | 1380 |
| Low-density lipoprotein receptor-related protein 6                                          | IP00000203  | HFAPPTPKSTDVCDSDYAPSRK          | 38.7 | 906.3727 | 3 | -0.00866  | -3.187 | 1524 | 1546 |
| Isomorf 1 of Transmembrane protein 192                                                      | IP00085873  | AKPEPDLLEEKIYAYSPNITSETGR       | 44.4 | 1,059.84 | 3 | -0.01263  | -3.975 | 200  | 226  |
| Isomorf 1 of Ephrin type-B receptor 2                                                       | IP00021275  | ADeYTDKQLQHYTSGHMTGPK           | 16.6 | 913.0053 | 3 | -0.01019  | -3.724 | 573  | 594  |
| Isomorf 1 of Ephrin type-B receptor 2                                                       | IP00021275  | ADeYTDKQLQHYTSGHMTGPK           | 22.5 | 886.3513 | 3 | -0.005861 | -2.206 | 573  | 594  |
| Isomorf 1 of Ephrin type-B receptor 2                                                       | IP00021275  | FLEDDTSDPTYSALGGKIPR            | 59.5 | 998.9218 | 2 | -0.006353 | -3.182 | 770  | 787  |
| Isomorf 1 of Ephrin type-B receptor 2                                                       | IP00021275  | FLEDDTSDPTYSALGGKIPR            | 21.3 | 826.0585 | 3 | -0.003829 | -1.547 | 770  | 791  |
| Isomorf 1 of Ephrin type-B receptor 2                                                       | IP00021275  | IYDPTVEDPNEAVR                  | 63.2 | 1,011.45 | 2 | -0.002653 | -1.312 | 595  | 610  |
| Isomorf 1 of Abl interactor 1                                                               | IP00431025  | NTPYKTLPEVQKPTVNDVYmTsPAR       | 20.6 | 998.1214 | 3 | -0.006976 | -2.331 | 195  | 219  |
| Isomorf 1 of GRB2-associated-binding protein 1                                              | IP00031068  | APASVDLSSLLNLR                  | 70.3 | 828.8834 | 2 | -0.003353 | -2.024 | 249  | 263  |
| Isomorf 1 of GRB2-associated-binding protein 1                                              | IP00031068  | KDASSQDcYDIPR                   | 56.9 | 817.8273 | 2 | -0.004519 | -2.764 | 398  | 410  |
| Neural Wiskott-Aldrich syndrome protein                                                     | IP00011676  | VYVDFEK                         | 21.8 | 553.7589 | 2 | -0.006553 | -5.923 | 254  | 261  |
| Peroxiredoxin-1                                                                             | IP00000874  | SKEYFSK                         | 16.6 | 484.708  | 2 | -0.003753 | -1.876 | 191  | 197  |
| 49 kDa protein                                                                              | IP000893111 | QAEEDRDMTEAAASEAPQDVTyAR        | 46.7 | 954.733  | 3 | -0.004129 | -4.443 | 391  | 415  |
| 49 kDa protein                                                                              | IP000893111 | QMDTEAAASEAPQDVTyAR             | 80.1 | 1,067.44 | 2 | -0.008853 | -4.149 | 397  | 415  |
| Tubulin-folding cofactor B                                                                  | IP000293126 | LGEYEDVSRVEK                    | 32.6 | 752.3375 | 2 | -0.005053 | -3.361 | 95   | 106  |
| Isomorf A of Endothelin B receptor                                                          | IP00029123  | ANDHGVDNFR                      | 19.5 | 644.7374 | 2 | -0.006753 | -5.241 | 425  | 434  |
| Isomorf A of Endothelin B receptor                                                          | IP00029123  | FKANDHVDNFR                     | 20.4 | 521.8815 | 3 | -0.007729 | -4.943 | 423  | 434  |
| Docking protein 2                                                                           | IP00022602  | QSRPMEENELYSASAVTVGPHK          | 45.9 | 650.5366 | 4 | -0.007171 | -2.759 | 128  | 149  |
| Isomorf 1 of T-cell-specific surface glycoprotein CD28                                      | IP00022339  | DFAAYR                          | 18   | 411.6615 | 2 | -0.002453 | -2.984 | 214  | 219  |
| Isomorf 1 of T-cell-specific surface glycoprotein CD28                                      | IP00022339  | DFAAYR                          | 30.3 | 455.1769 | 2 | -0.003653 | -4.018 | 214  | 220  |
| Isomorf 1 of T-cell-specific surface glycoprotein CD28                                      | IP00022339  | HYQYAPRR                        | 28.6 | 604.7638 | 2 | -0.004553 | -3.768 | 205  | 213  |
| Isomorf 1 of T-cell-specific surface glycoprotein CD28                                      | IP00022339  | HYQYAPRR                        | 28.4 | 644.7471 | 2 | -0.004285 | -3.326 | 205  | 213  |
| Isomorf 1 of T-cell-specific surface glycoprotein CD28                                      | IP00022339  | KHYQYAPRR                       | 18.2 | 668.8109 | 2 | -0.005353 | -4.005 | 204  | 213  |
| Isomorf 1 of T-cell-specific surface glycoprotein CD28                                      | IP00022339  | KHYQYAPRR                       | 26.5 | 708.7946 | 2 | -0.004285 | -3.025 | 204  | 213  |
| Isomorf 1 of T-cell-specific surface glycoprotein CD28                                      | IP00022339  | LLHSDYMNMPR                     | 18.6 | 819.3124 | 2 | -0.007885 | -4.815 | 186  | 197  |
| Dihydropyrimidinase-related protein 1                                                       | IP000414123 | GMYDGPYEVPAATK                  | 23.4 | 852.371  | 2 | -0.004153 | -2.438 | 497  | 511  |
| Isomorf 1 of Colicoid-like domain-containing protein 50                                     | IP000383423 | NERPARPPPIIMTDGEDAYHFTHQSSSTR   | 43.8 | 902.8972 | 4 | -0.01941  | -5.378 | 260  | 290  |
| Isomorf A1-B of Heterogeneous nuclear ribonucleoprotein A1                                  | IP000215965 | SSGPGYGGQYFAKPR                 | 32.9 | 854.8755 | 2 | -0.004353 | -2.548 | 337  | 352  |
| Isomorf 1 of Protein CDV3 homolog                                                           | IP00014197  | EVYDYSGLR                       | 24.1 | 509.7138 | 2 | -0.003853 | -3.784 | 92   | 99   |
| Isomorf 1 of Protein CDV3 homolog                                                           | IP00014197  | TAPVQAPPAPVIVTETEPAMTSGVYRPPGAR | 20.4 | 1,113.22 | 3 | -0.007929 | -2.376 | 144  | 175  |
| Isomorf 1 of Protein CDV3 homolog                                                           | IP00014197  | TPQGPPEIYSDTQFFSLQSTAK          | 36.9 | 1,236.57 | 2 | -0.006534 | -2.643 | 182  | 203  |
| Isomorf 1 of Pleckstrin homology domain-containing family A member 5                        | IP00029515  | ERPSIMINEASNNVYSDYAVHMPSPVGR    | 26.6 | 1,132.16 | 3 | -0.003861 | -1.137 | 116  | 144  |
| Isomorf 1 of Pleckstrin homology domain-containing family A member 5                        | IP00029515  | GGNRNPLGLTEADR                  | 26.8 | 899.3978 | 2 | -0.003453 | -1.921 | 388  | 403  |
| Isomorf 1 of Tensin-3                                                                       | IP000658152 | AGDVAYNLPPFPSPADVK              | 25   | 1,017.98 | 2 | -0.004753 | -2.336 | 798  | 816  |
| Isomorf 1 of Voltage-gated potassium channel subunit beta-2                                 | IP00021088  | QTSGPMIYSR                      | 47.9 | 689.2952 | 2 | -0.003853 | -2.799 | 17   | 28   |
| Syndecan-1                                                                                  | IP00002441  | KDEGSYSLEPK                     | 46.6 | 731.3085 | 2 | -0.004953 | -3.389 | 281  | 292  |
| Syndecan-1                                                                                  | IP00002441  | QANGGAYQKPTKQEEFYA              | 31   | 1,095.45 | 2 | -0.005485 | -2.505 | 293  | 310  |
| Actin-related protein 10                                                                    | IP00302690  | PLYEGLGSGGCK                    | 38.9 | 643.7839 | 2 | -0.006153 | -4.763 | 2    | 13   |
| Isomorf 1 of SLAM family member 7                                                           | IP00099863  | ETPNLKHSGENTYDITPIHTR           | 22.9 | 921.3853 | 3 | -0.01009  | -3.655 | 270  | 292  |
| Isomorf 1 of SLAM family member 7                                                           | IP00099863  | TILKEDPANTVYSTVEIKP             | 65.7 | 1,099.55 | 2 | -0.004753 | -2.163 | 293  | 311  |
| Discoidin, CUB and LCC1 domain-containing protein 1                                         | IP000337612 | AGRHEVALPLAPPEYATPIVER          | 22.3 | 919.4515 | 3 | -0.004629 | -1.68  | 584  | 607  |
| Isomorf 1 of Girdin                                                                         | IP00171134  | KTEDYFISAGKPTPGTQK              | 37.1 | 765.027  | 3 | -0.008729 | -3.807 | 1760 | 1780 |
| Isomorf 1 of Docking protein 1                                                              | IP00015287  | IAPGSHYSDYDPLDSTSAQAGEGVQR      | 24.3 | 1,010.44 | 3 | -0.01129  | -3.728 | 305  | 332  |
| Isomorf 1 of Docking protein 1                                                              | IP00015287  | KKPLWDLVYEAHQQLLK               | 30.1 | 821.0605 | 3 | -0.005061 | -2.056 | 333  | 350  |
| Isomorf 1 of Docking protein 1                                                              | IP00015287  | SHNSALYSVQVK                    | 25.9 | 841.2183 | 3 | -0.006729 | -4.668 | 443  | 454  |
| Isomorf 1 of Docking protein 1                                                              | IP00015287  | VKEEGYELPNPADDYAVPPRR           | 17.2 | 927.3992 | 3 | -0.006461 | -2.324 | 393  | 415  |
| Isomorf 1 of Docking protein 1                                                              | IP00015287  | VKEEGYELPNPADDYAVPPRR           | 22   | 900.7428 | 3 | -0.009329 | -3.455 | 393  | 415  |
| Isomorf 2 of Dual adapter for phosphotyrosine and 3-phosphotyrosine and 3-phosphoIP00004301 | IP00004301  | KVEEPSYEVSR                     | 28.2 | 758.3553 | 2 | -0.005753 | -3.796 | 132  | 143  |
| Isomorf 1 of Lipolytic-stimulated lipoprotein receptor                                      | IP00409640  | AATSGPYSIAPSTYAHLSPAK           | 49.9 | 1,175.03 | 2 | -0.007685 | -3.271 | 314  | 335  |
| Isomorf 1 of Intersectin-2                                                                  | IP000892957 | REGEALYAVNKK                    | 27.2 | 523.9135 | 3 | -0.004929 | -3.14  | 961  | 973  |
| Isomorf Alpha of Paxillin                                                                   | IP00220030  | VGEHEHYVSPNKK                   | 17.7 | 538.8978 | 3 | -0.004729 | -2.929 | 111  | 123  |
| Isomorf Alpha of Paxillin                                                                   | IP00220030  | VGEHEHYVSPNKK                   | 19.9 | 624.2819 | 3 | -0.006029 | -3.223 | 111  | 125  |
| Isomorf 3 of Tyrosine-protein phosphatase non-receptor type 6                               | IP00183046  | GQSEYGNITVYPAMK                 | 39.8 | 932.8917 | 2 | -0.006353 | -3.407 | 492  | 507  |
| Isomorf 3 of Tyrosine-protein phosphatase non-receptor type 6                               | IP00183046  | HKEDVYENLHTK                    | 25.5 | 531.5723 | 3 | -0.008229 | -5.167 | 520  | 531  |
| Isomorf 3 of Drebrin-like protein                                                           | IP00101968  | ASGANYSFHK                      | 22.8 | 581.2371 | 2 | -0.005453 | -4.695 | 135  | 144  |
| Tax_Id=9606 Gene_Symbol=ARHGAP27 Uncharacterized protein                                    | IP000983933 | ALPAQVDDPPEPVYANIER             | 55.7 | 1,087.51 | 2 | -0.004053 | -1.864 | 0    | 0    |
| Isomorf 7 of Partitioning defective 3 homolog                                               | IP00045423  | ISHSLYSGIEGLDESPR               | 20.8 | 676.3066 | 3 | -0.006629 | -3.271 | 701  | 718  |
| Isomorf 1 of Disintegrin and metalloproteinase domain-containing protein 9                  | IP00440932  | HVSPVPREVPYVYANR                | 26.4 | 697.995  | 3 | -0.007261 | -3.471 | 756  | 772  |
| Isomorf 1 of Fibroblast growth factor receptor 3                                            | IP00027174  | RPRGLDYFDTCPPPEQLKFDLVSACAYQVAR | 37.4 | 992.7212 | 4 | 0.02306   | 5.813  | 571  | 603  |
| Isomorf 1 of 1-phosphatidylinositol-4,5-bisphosphate phosphodiesterase gamma-1              | IP00016736  | KLAEGGAYEEVPTSMYSSEINDISIK      | 20.3 | 1,051.78 | 3 | 0.01724   | 5.467  | 465  | 491  |
| Isomorf 1 of Breakpoint cluster region protein                                              | IP00004497  | KHGQKQKADAEKPFVWVEFHIER         | 22.5 | 566.6677 | 5 | 0.01992   | 7.04   | 163  | 186  |
| T-cell receptor-associated transmembrane adapter 1                                          | IP00008993  | MQEATPSAQATNETQCMYASLDHVK       | 30.9 | 993.4247 | 3 | 0.02281   | 7.657  | 93   | 118  |
| Isomorf 1 of Mucin-1                                                                        | IP00013955  | DTHPMSEYPRYTHGR                 | 22.9 | 724.632  | 3 | 0.01727   | 7.952  | 1201 | 1217 |
| 1-phosphatidylinositol-4,5-bisphosphate phosphodiesterase gamma-2                           | IP000329185 | RQEEINLNSLDYDTHNLR              | 45.1 | 837.738  | 3 | 0.02167   | 8.63   | 1206 | 1224 |
| breast cancer anti-estrogen resistance protein 1 isomorf 5                                  | IP000641339 | GLPPSNHAYDVPPSVSK               | 20   | 694.3361 | 3 | 0.008471  | 4.07   | 296  | 314  |
| breast cancer anti-estrogen resistance protein 1 isomorf 5                                  | IP000641339 | RPRGTLVDYPRR                    | 17.9 | 564.9498 | 3 | 0.01287   | 7.603  | 380  | 390  |
| Wiskott-Aldrich syndrome protein                                                            | IP00001545  | AGISEAQLTDAETSKLYDFIEQDGLLEAVR  | 79.2 | 1,140.56 | 3 | 0.03057   | 8.94   | 274  | 304  |
| Wiskott-Aldrich syndrome protein                                                            | IP00001545  | LJYDFIEQDGLLEAVR                | 72.9 | 959.4619 | 2 | 0.01685   | 8.784  | 289  | 304  |
| early estrogen-induced gene 1 protein isomorf b                                             | IP00041759  | VSSGVYEPVVEIHS                  | 34.1 | 791.3705 | 2 | 0.01415   | 8.944  | 229  | 242  |
| Uncharacterized protein                                                                     | IP00251161  | GIHPYHSLYTSYSGDTSDFPVHVR        | 38   | 684.3187 | 4 | 0.02709   | 9.909  | 2255 | 2279 |
| Isomorf 1 of T-lymphocyte surface antigen Ly-9                                              | IP000183782 | TPVSKESAIYCSIR                  | 42   | 1,068.49 | 2 | 0.004781  | 2.238  | 613  | 630  |
| Cytokine receptor common subunit gamma                                                      | IP00012899  | GGALGEGGASPCNQHSPYWAPPCTYLPKET  | 29   | 1,153.82 | 3 | 0.01791   | 5.177  | 339  | 369  |
| Tyrosine-protein kinase Mer                                                                 | IP00029756  | KIYSDYGR                        | 25.4 | 642.7578 | 2 | 0.007215  | 5.447  | 747  | 755  |
| Uncharacterized protein FL145252                                                            | IP000397883 | TQNNLESYDLAR                    | 36.5 | 752.3334 | 2 | 0.01195   | 7.945  | 20   | 31   |

|                                                                                                 |             |                                  |      |           |   |             |          |      |      |
|-------------------------------------------------------------------------------------------------|-------------|----------------------------------|------|-----------|---|-------------|----------|------|------|
| Neural Wiskott-Aldrich syndrome protein                                                         | IP00011676  | ETSKVYDFIEK                      | 23.1 | 776.3746  | 2 | 0.007547    | 4.863    | 250  | 261  |
| Isoform 2 of Fermitin family homolog 3                                                          | IP00216699  | TASGDYDSSWEELR                   | 45.3 | 840.3576  | 2 | 0.01295     | 7.708    | 6    | 19   |
| Leucine-rich repeat and fibronectin type-III domain-containing protein 6                        | IP00289849  | VATKGNVEIVR                      | 31.3 | 665.3356  | 2 | 0.007647    | 5.751    | 496  | 506  |
| Isoform RMO1ab of Ras-associated and pleckstrin homology domains-containing protein             | IP00402234  | TESAYDWTLSLSSSSIK                | 26.2 | 921.4041  | 2 | 0.01685     | 9.147    | 572  | 587  |
| Isoform Long of Tight junction protein ZO-1                                                     | IP00216219  | LRPEAQPHPSAGPKPAESKQYFEQYSR      | 33.6 | 636.5128  | 5 | 0.02412     | 7.588    | 1171 | 1197 |
| Flotillin-2                                                                                     | IP00789008  | TAAEQLAYELQGAR                   | 59.4 | 800.8777  | 2 | 0.01135     | 7.088    | 234  | 247  |
| DnaJ homolog subfamily A member 1                                                               | IP00012535  | HNGYEAEGVEDEHPR                  | 36.7 | 650.2512  | 3 | 0.01437     | 7.374    | 375  | 389  |
| Isoform 1 of Poliovirus receptor-related protein 3                                              | IP00022959  | TFRGDYFAK                        | 24   | 592.7653  | 2 | 0.009647    | 8.144    | 433  | 441  |
| Isoform 5 of Protein transport protein Sec16A                                                   | IP00031242  | SSLSSHSHSQSYR                    | 28.4 | 566.2562  | 3 | 0.01027     | 6.053    | 1190 | 1203 |
| Isoform 1 of Lipolysis-stimulated lipoprotein receptor                                          | IP00409640  | SGDLPVQGRLLLEAVR                 | 48.9 | 935.4485  | 2 | 0.01525     | 8.154    | 581  | 596  |
| Isoform 1 of Lipolysis-stimulated lipoprotein receptor                                          | IP00409640  | VLYMEKELANFDPSRPGPPSGR           | 37   | 907.0985  | 3 | 0.02216     | 8.148    | 404  | 426  |
| Isoform 1 of Lipolysis-stimulated lipoprotein receptor                                          | IP00409640  | VLYMEKELANFDPSRPGPPSGR           | 48.7 | 928.4221  | 3 | 0.02154     | 7.739    | 404  | 426  |
| Isoform 1 of Histone-lysine N-methyltransferase MLL3                                            | IP00168806  | KLGTSLKPDVPVK                    | 20.4 | 730.3943  | 2 | -0.01105    | -7.572   | 4385 | 4397 |
| Mitogen-activated protein kinase 3                                                              | IP00018195  | IADPEHDTLGFLEIVATR               | 26   | 777.9993  | 3 | 0.01484     | 6.363    | 190  | 208  |
| Protein                                                                                         | IP00946804  | XsLsMLsRLrLLLMVATPalMGVtLmGSGLR  | 24.9 | 748.7432  | 5 | -13.98      | 16.68    | 1    | 33   |
| Vimentin                                                                                        | IP00418471  | sLYASSPGGYATR                    | 35.8 | 754.8501  | 2 | 0.01485     | 9.841    | 51   | 64   |
| Inner nuclear membrane protein Man1                                                             | IP00032491  | LLLLLGVVmvCVLRYMK                | 11.3 | 594.5707  | 4 | 0.01205     | 5.073    | 635  | 653  |
| Heat shock protein HSP 90-beta                                                                  | IP00414676  | LVSSPCVtTYGWTANMER               | 17.5 | 838.0362  | 3 | 0.02334     | 9.291    | 584  | 604  |
| Isoform 2 of RaiBP1-associated Eps domain-containing protein 2                                  | IP00332687  | DVLVYQSPKPIR                     | 26.3 | 790.403   | 2 | 0.01055     | 6.676    | 416  | 428  |
| Isoform 2 of RaiBP1-associated Eps domain-containing protein 2                                  | IP00332687  | DVLVYQSPKPIR                     | 17.5 | 579.3053  | 3 | 0.01207     | 6.953    | 416  | 429  |
| Isoform 3 of Protein scribble homolog                                                           | IP00410666  | MVEFENAVTITLPRFEDDYSPRER         | 21.4 | 724.3455  | 4 | 0.02089     | 7.219    | 816  | 839  |
| T-cell antigen CD7                                                                              | IP00015199  | DKNSAACVVEDMSHR                  | 32.6 | 683.6163  | 3 | 0.01421     | 6.933    | 213  | 229  |
| T-cell antigen CD7                                                                              | IP00015199  | DKNSAACVVEDMSHR                  | 35.2 | 688.9493  | 3 | 0.01829     | 8.838    | 213  | 229  |
| T-cell antigen CD7                                                                              | IP00015199  | NSAACVVEDMSHR                    | 21.6 | 602.5757  | 3 | 0.01441     | 7.978    | 215  | 229  |
| Transmembrane protein 106B                                                                      | IP00395903  | SLSHLPLHSSKEDAYGVGTSNMNR         | 15.1 | 689.0679  | 4 | 0.02599     | 9.441    | 4    | 27   |
| Dihydropyrimidinase-related protein 1                                                           | IP00414123  | GmYDGPVYEVPAATPK                 | 26.1 | 860.3744  | 2 | 0.007732    | 4.496    | 497  | 511  |
| Activated CDC42 kinase 1                                                                        | IP00552750  | KVSTHYLLPFRPSYLER                | 15.8 | 605.3055  | 4 | 0.01479     | 6.118    | 907  | 925  |
| Isoform 2 of Receptor-type tyrosine-protein phosphatase alpha                                   | IP00221067  | VVQEYIDAFSDYANFK                 | 86.2 | 994.9436  | 2 | 0.01215     | 6.107    | 778  | 793  |
| Isoform 3 of Putative GTP-binding protein Parf                                                  | IP00514853  | TADELEAFGLGGAGRRHGPGGDYEEL       | 26.6 | 941.7531  | 3 | 0.01847     | 6.542    | 0    | 0    |
| mRNA-decapping enzyme 1B                                                                        | IP00328309  | KITSSADRYDNPNLKIPVPKSPENQQQR     | 19.5 | 837.1922  | 4 | 0.02639     | 7.889    | 183  | 211  |
| Protein S100-A11                                                                                | IP00013895  | YAGKDGWYTLSSK                    | 25.7 | 780.347   | 2 | 0.008847    | 5.672    | 24   | 36   |
| Putative annexin A2-like protein                                                                | IP00334627  | LSLEGDHSTPPSAYGVK                | 18.5 | 642.3004  | 3 | 0.01767     | 9.18     | 11   | 28   |
| Isoform 1 of Actin-binding LIM protein 1                                                        | IP00329495  | TSSESYRPGSSIGSPGHHTYAK           | 27   | 913.7487  | 3 | 0.02514     | 9.177    | 351  | 375  |
| Isoform 1 of Actin-binding LIM protein 1                                                        | IP00329495  | TSSESYRPGSSIGSPGHHTYAK           | 33.2 | 887.0933  | 3 | 0.02527     | 9.503    | 351  | 375  |
| Hepatocellular carcinoma-associated antigen 59                                                  | IP00433576  | NAEDLVLPENIR                     | 49.8 | 908.392   | 2 | 0.01468     | 8.085    | 63   | 76   |
| Prostate androgen-regulated mucin-like protein 1                                                | IP00294910  | LLDDHDYGSWGVNPNLYDSS             | 37.8 | 1,277.000 | 2 | 0.01265     | 4.954    | 290  | 310  |
| Ankyrin repeat and SAM domain-containing protein 1A                                             | IP00395663  | IIASLADRPYEPPQKPRR               | 35.6 | 753.0563  | 3 | 0.01637     | 7.253    | 825  | 843  |
| Uncharacterized protein                                                                         | IP00895781  | SUAAGVWGLHQAHTHYPTK              | 21.9 | 706.6741  | 3 | -0.009229   | -4.358   | 153  | 171  |
| Tyrosine-protein phosphatase non-receptor type 3                                                | IP00289649  | NVLVSQVWTGSR                     | 27.6 | 761.3381  | 2 | 0.01335     | 8.771    | 319  | 330  |
| Inulin receptor substrate 2 insertion mutant (Fragment)                                         | IP00464978  | sYKAPYCGGDSQVPLMSSPVGVR          | 18.6 | 906.7314  | 3 | 0.02191     | 8.059    | 811  | 834  |
| cDNA FLJ35042 fis, clone OCBBF2017489, highly similar to Homo sapiens ankyrin 3, rIP00333558    | IP00333558  | IHGSHGVEEAPSLAAVYQK              | 29   | 690.9992  | 3 | 0.01847     | 8.919    | 310  | 328  |
| zinc finger protein 721                                                                         | IP00556434  | sINLTAHRK                        | 21.2 | 594.2497  | 2 | -0.004885   | -4.114   | 177  | 185  |
| Polymerase (RNA) I polypeptide C, 30kDa                                                         | IP00552334  | FAASQAVEEMR                      | 24   | 440.1893  | 3 | 0.003671    | 2.784    | 0    | 0    |
| Isoform 2 of SH2 domain-containing protein 2A                                                   | IP00099806  | SQDPNPQYSPIIK                    | 21.9 | 783.8633  | 2 | -0.0008534  | -0.5447  | 209  | 221  |
| Isoform Long of Vesicle transport through interaction with t-SNAREs homolog 1B                  | IP00063784  | YGIVAVENHMNR                     | 29.6 | 559.236   | 3 | 0.00007058  | 0.04212  | 112  | 124  |
| Isoform 2 of Alpha-endosulfine                                                                  | IP00220797  | GQKQYFSDGDYNNMAK                 | 53.6 | 852.3427  | 2 | 0.0008466   | 4.969    | 61   | 74   |
| Isoform 1 of Probable phospholipid-transporting ATPase IIB                                      | IP00396022  | AAySAAGRRPGADR                   | 26.5 | 534.9061  | 3 | -0.002329   | -1.453   | 23   | 37   |
| Isoform 1 of Stromal membrane-associated protein 2                                              | IP00102856  | LVEAYLFFTR                       | 43.3 | 741.3394  | 2 | 0.0002466   | 0.1664   | 92   | 102  |
| Isoform 1 of Protein phosphatase 1 regulatory subunit 12A                                       | IP00183002  | LAyVAPTRP                        | 40.6 | 590.8098  | 2 | -0.0003534  | -0.2994  | 494  | 503  |
| Isoform 1 of AP-1 complex-associated regulatory protein                                         | IP00000795  | IVQQVYPSNIGeYQSSGFEDFESCLR       | 48.8 | 1,079.45  | 3 | 0.000005275 | 0.00163  | 133  | 159  |
| Isoform 1 of PHD and RING finger domain-containing protein 1                                    | IP00001813  | SSAIRSK                          | 19.3 | 408.6866  | 2 | 0.004847    | 5.937    | 363  | 369  |
| Isoform 1 of E3 ubiquitin-protein ligase rifylin                                                | IP00103867  | MQAYSNSYGFSSFPSTGLESPCK          | 35.2 | 862.3632  | 3 | 0.002505    | 0.9691   | 26   | 48   |
| Tax_Id=9606 Gene_Symbol=PPF1A1 Protein                                                          | IP000977583 | HPSTSGKR                         | 15.9 | 515.1947  | 2 | -0.009385   | -9.117   | 0    | 0    |
| Tyrosine-protein kinase Mer                                                                     | IP00029756  | IYSGDYR                          | 22.9 | 558.7247  | 2 | 0.002347    | 2.102    | 748  | 755  |
| Tyrosine-protein kinase Mer                                                                     | IP00029756  | KIYSGDYR                         | 25.4 | 622.7707  | 2 | -0.0006534  | -0.525   | 747  | 755  |
| Isoform 3 of TOM1-like protein 2                                                                | IP00328178  | KTVTYEDPQAVGLASALDNR             | 48   | 762.3659  | 3 | 0.001971    | 0.8624   | 355  | 375  |
| Isoform 1 of Beta-actinin                                                                       | IP00019904  | WLNTNPYLR                        | 22   | 679.3167  | 2 | -0.003953   | -2.912   | 433  | 442  |
| Ribosomal protein S6 kinase alpha-3                                                             | IP00020898  | GmAAATYSALNR                     | 71.2 | 661.2851  | 2 | 0.002332    | 1.764    | 701  | 712  |
| Isoform 1 of Hepatocyte growth factor-regulated tyrosine kinase substrate                       | IP00006176  | VVQDTYQIMK                       | 40.2 | 652.8021  | 2 | 0.001147    | 0.8789   | 127  | 136  |
| Isoform 1 of Hepatocyte growth factor-regulated tyrosine kinase substrate                       | IP00006176  | yLNRNYWEK                        | 16.7 | 723.2862  | 2 | 0.0001151   | 0.07962  | 329  | 337  |
| Isoform 1 of Homeodomain-interacting protein kinase 3                                           | IP00099522  | TVcSTYLQSR                       | 42.5 | 647.7783  | 2 | -0.0004187  | -0.3235  | 354  | 363  |
| E3 ubiquitin-protein ligase CBL                                                                 | IP00027269  | IKPSSANYSLSAARPLPVK              | 20.5 | 814.086   | 3 | 0.003239    | 1.327    | 664  | 685  |
| Isoform 4 of Death-inducer obliterator 1                                                        | IP00619921  | ALGSAQYEDPR                      | 25.5 | 643.7751  | 2 | 0.001547    | 1.202    | 1694 | 1704 |
| Isoform 3 of Protein scribble homolog                                                           | IP00410666  | GLQPLKDiYR                       | 18.9 | 641.8321  | 2 | 0.001147    | 0.8939   | 1260 | 1269 |
| Probable ATP-dependent RNA helicase DDX6                                                        | IP00030320  | SLYAEAYHSEPVDEK                  | 37.7 | 1,036.45  | 2 | 0.005047    | 2.436    | 467  | 483  |
| Tyrosine-protein phosphatase non-receptor type 18 isoform 2                                     | IP00152019  | SSEAPYsKYVTR                     | 36.8 | 814.39    | 2 | -0.00005342 | -0.03282 | 275  | 288  |
| Isoform 3 of TBC domain-containing protein kinase-like protein                                  | IP00062810  | SSAPYFSAECPDPPKTLDSR             | 22.4 | 769.0004  | 3 | 0.002205    | 0.9567   | 665  | 684  |
| Isoform 1 of Tensin-3                                                                           | IP00658152  | QQQVWVAHQYSFAOPDGAR              | 18.8 | 753.329   | 3 | 0.002756    | 1.22     | 592  | 610  |
| Isoform 1 of Signal transducing adapter molecule 1                                              | IP00020178  | LMNEDPMySMYAK                    | 33.5 | 836.8277  | 2 | 0.002347    | 1.403    | 374  | 386  |
| Isoform 1 of Lipolysis-stimulated lipoprotein receptor                                          | IP00409640  | VLYMEK                           | 13.3 | 521.2219  | 2 | 0.0002316   | 0.2224   | 404  | 410  |
| Isoform 7 of Partitioning defective 3 homolog                                                   | IP00045423  | FSPDSQYIDNR                      | 34.2 | 711.2908  | 2 | 0.0009466   | 0.6659   | 382  | 392  |
| 1-phosphatidylinositol-4,5-bisphosphate phosphodiesterase gamma-2                               | IP00329185  | MyVDPSIENPMPQR                   | 40.9 | 922.3939  | 2 | 0.004947    | 2.683    | 758  | 772  |
| Signal transducer and activator of transcription 5A                                             | IP00030783  | AVDGYVQPKI                       | 32.1 | 649.3307  | 2 | -0.001253   | -0.9659  | 690  | 700  |
| Cytokine receptor common subunit gamma                                                          | IP00012899  | NLEDLVTEYHGNFSAWSGVSK            | 24.7 | 811.6964  | 3 | -0.001229   | -0.5053  | 295  | 315  |
| Isoform 1 of Lymphocyte transmembrane adapter 1                                                 | IP00301971  | HREEMNSDSSDYENVLTAk              | 20.5 | 812.0009  | 3 | 0.001671    | 0.6864   | 361  | 380  |
| LMBR1 domain-containing protein 2                                                               | IP00017940  | NMDDYEDFDEKHSIYSPCK              | 30.9 | 814.6537  | 3 | -0.001629   | -0.6673  | 286  | 304  |
| Isoform 1 of Protein CDV3 homolog                                                               | IP00014197  | TPQGPPEYSDTQFSSLQSTAKHVESR       | 34.3 | 770.8624  | 4 | -0.008605   | -2.794   | 182  | 208  |
| Uncharacterized protein                                                                         | IP00847241  | SSFEGLGSFPPLPGAAGNLK             | 7.51 | 434.6217  | 5 | 0.01642     | 7.569    | 0    | 0    |
| Dual specificity protein phosphatase 9                                                          | IP00294486  | ALLPGPPLQPPPAPVLYDQGGRR          | 3.12 | 552.1017  | 5 | 0.01402     | 5.086    | 63   | 88   |
| HLA class I histocompatibility antigen, B-78 alpha chain                                        | IP00746605  | GyNqYSEAGSHWQMyGdVPGDGR          | 1.05 | 683.9996  | 5 | -0.0292     | -8.549   | 107  | 132  |
| Tax_Id=9606 Gene_Symbol=C12orf56 21 kDa protein                                                 | IP01015553  | IPSNLVSSVLLLEVKSHIGLR            | 1.48 | 478.2674  | 5 | -0.005496   | -2.302   | 0    | 0    |
| Tyrosine-specific basic protein                                                                 | IP00009536  | HVLEITLVLTLGLLAILLALTR           | 0.89 | 572.3552  | 5 | 0.02482     | 8.685    | 1    | 26   |
| Coiled-coil domain-containing protein 106                                                       | IP00107188  | MEGDRGGAGGEGADPEsAASLGSSEGAER    | 6.54 | 538.7409  | 7 | -0.02349    | -6.239   | 117  | 151  |
| Isoform 4 of E3 ubiquitin-protein ligase UBR4                                                   | IP00640981  | LVIARSAIMRPNLNVHFTESK            | 0.9  | 538.8948  | 5 | 0.02362     | 8.779    | 2573 | 2595 |
| Isoform A of Probable tubulin polyglutamylase TLL1                                              | IP00320599  | LKPWLIEVNASPLSSTANDRLIK          | 3.09 | 567.5453  | 5 | 0.01122     | 3.959    | 320  | 344  |
| Conserved hypothetical protein                                                                  | IP00929327  | VEEVGEASADmPEPstsqQENsmK         | 4.21 | 705.9965  | 5 | 0.008668    | 2.458    | 58   | 84   |
| WD repeat and FYVE domain-containing protein 1                                                  | IP00024283  | DsGQWpSYHtmASpCsAMAJVHDSr        | 9.11 | 522.4404  | 7 | -0.01007    | -2.758   | 55   | 81   |
| Protein kinase C, theta                                                                         | IP00552075  | XLSSLPLFLPIIPK                   | 1.38 | 411.8389  | 5 | 26.08       | 2.583    | 1    | 17   |
| Isoform 1 of Abi1 interactor 1                                                                  | IP00431025  | NPTPKYLPVKKPTVNDYMTSPAR          | 40.9 | 966.1337  | 3 | -0.008829   | -3.048   | 195  | 219  |
| cDNA FLJ46292 fis, clone TEST14033177, highly similar to Dual specificity protein phosphatase 9 | IP00080732  | EATEPQDMVYDQSRDASVLAADR          | 9.14 | 570.2548  | 5 | -0.005581   | -1.96    | 2    | 26   |
| Glucose phosphate isomerase variant (Fragment)                                                  | IP00556013  | tGQAeSALRPSLLGVRsVGLAASPVSAPGLLR | 6.42 | 755.1761  | 5 | 0.03386     | 8.976    | 85   | 119  |
| Cystatin-SN                                                                                     | IP00305477  | AQYLSLTLATLVALAWSPK              | 1.31 | 508.0919  | 5 | 0.01122     | 4.384    | 2    | 24   |
| <b>KMS18</b>                                                                                    |             |                                  |      |           |   |             |          |      |      |
| Putative G-protein coupled receptor 44                                                          | IP00001921  | yIDHAVALHGLASLLGVENGVLFPVGR      | 6.26 | 567.3026  | 6 | -0.02692    | -7.921   | 30   | 60   |
| Isoform 2 of U1 small nuclear ribonucleoprotein 70 kDa                                          | IP00219483  | EFEVYGPKR                        | 21.3 | 659.3152  | 2 | -0.0008534  | -0.6477  | 122  | 131  |

|                                                                                        |             |                           |      |          |   |             |          |      |      |
|----------------------------------------------------------------------------------------|-------------|---------------------------|------|----------|---|-------------|----------|------|------|
| Activated CDC42 kinase 1                                                               | IP100442025 | KVSTHYLLPERPSYLER         | 23.7 | 605.302  | 4 | 0.0007946   | 0.3286   | 907  | 925  |
| Isolated 1 of T-cell-specific surface glycoprotein CD28                                | IP100022339 | LLHSDYMMNTPR              | 24.5 | 779.3333 | 2 | 0.0002466   | 0.1583   | 186  | 197  |
| Isolated 1 of Glycogen synthase kinase-3 beta                                          | IP100028570 | GEPNVSYICSR               | 25.1 | 681.2799 | 2 | -0.003019   | -2.217   | 210  | 220  |
| Elongation factor 1-alpha 1                                                            | IP100396485 | EHALLAYTLGVK              | 23.4 | 697.8568 | 2 | -0.001753   | -1.257   | 135  | 146  |
| Discoidin domain-containing receptor 2                                                 | IP100004409 | IFPLRPDYQEPSR             | 22.3 | 849.4072 | 2 | 0.002247    | 1.323    | 474  | 486  |
| Isolated 1 of Dual specificity tyrosine-phosphorylation-regulated kinase 1B            | IP100000352 | IVQYIQR                   | 14.9 | 575.7672 | 2 | -0.002153   | -1.872   | 270  | 277  |
| DNA topoisomerase 1                                                                    | IP100413611 | LNLYLDR                   | 23.1 | 485.7233 | 2 | -0.0001534  | -0.1581  | 721  | 727  |
| Tyrosine-protein kinase Fgr                                                            | IP100016871 | KLDMGGYITTR               | 30.3 | 749.3447 | 2 | 0.001147    | 0.7656   | 202  | 213  |
| Cell division protein kinase 3                                                         | IP100023503 | IGEGTYGVVYK               | 15.6 | 633.2939 | 2 | -0.0009534  | -0.7533  | 38   | 48   |
| Cell division protein kinase 3                                                         | IP100023503 | IGEGTYGVVYK               | 15.6 | 673.2766 | 2 | -0.001885   | -1.401   | 38   | 48   |
| Cell division protein kinase 3                                                         | IP100023503 | VEKIGEGTYGVVYK            | 16.6 | 567.9221 | 3 | -0.002061   | -1.211   | 35   | 48   |
| Cell division protein kinase 3                                                         | IP100023503 | VEKIGEGTYGVVYK            | 18   | 811.3963 | 2 | -0.002153   | -1.328   | 35   | 48   |
| Tax_Id=9606 Gene_Symbol=CDK1 Uncharacterized protein                                   | IP100985068 | IEKIGEGTYGVVYK            | 19.3 | 572.5942 | 3 | -0.001461   | -0.8515  | 0    | 0    |
| Tax_Id=9606 Gene_Symbol=CDK1 Uncharacterized protein                                   | IP100985068 | IEKIGEGTYGVVYK            | 31.8 | 818.4055 | 2 | 0.0005466   | 0.3341   | 0    | 0    |
| Calsequestrin-1                                                                        | IP100843888 | LIGYFKK                   | 19.3 | 518.2664 | 2 | -0.002053   | -1.983   | 176  | 183  |
| cDNA FLJ50299, highly similar to Rab GDP dissociation inhibitor beta                   | IP100031461 | TDYLDQPYETINR             | 33.8 | 991.8968 | 2 | 0.002281    | 1.151    | 198  | 212  |
| Serine/threonine-protein kinase PRK4 homolog                                           | IP100013721 | LcDFGSASHVADNDITPYLVS     | 15.3 | 839.7081 | 3 | -0.001995   | -0.7925  | 832  | 853  |
| Insulin receptor substrate 2 insertion mutant (Fragment)                               | IP100464978 | SDDMPYSPASVAFK            | 32.9 | 881.8554 | 2 | -0.0009534  | -0.5409  | 674  | 689  |
| Insulin receptor substrate 2 insertion mutant (Fragment)                               | IP100464978 | SYKAPYTCGGSSDQYVLMSSPVGR  | 30.5 | 906.7234 | 3 | -0.002095   | -0.7706  | 811  | 834  |
| Insulin SEF2-1B of Transcription factor 4                                              | IP100013492 | sSSGWSWNGHPSRNVGDPYDHmtsR | 7.19 | 622.0172 | 6 | -0.02326    | -6.241   | 54   | 83   |
| Mitogen-activated protein kinase 3                                                     | IP100018195 | IADPEHDTGFLTEYVATR        | 21.9 | 751.338  | 3 | -0.002729   | -1.212   | 190  | 208  |
| Non-receptor tyrosine-protein kinase TYK2                                              | IP100022353 | LLAQAEPEYR                | 19.4 | 800.3664 | 2 | 0.001681    | 1.051    | 282  | 294  |
| Ribosomal protein S27                                                                  | IP100397358 | LVQSPNRYFMDVK             | 29.9 | 804.3624 | 2 | -0.00005342 | -0.03323 | 88   | 100  |
| Pyruvate dehydrogenase E1 component subunit alpha, testis-specific form, mitochondrial | IP100024087 | YHGMSIDPQVSYR             | 37.8 | 558.223  | 3 | -0.002929   | -1.751   | 287  | 300  |
| Insulin receptor precursor                                                             | IP100025803 | DIYETDYRK                 | 19.5 | 723.3033 | 2 | 0.0007466   | 0.5164   | 1203 | 1212 |
| Isolated 1 of Fibroblast growth factor receptor 3                                      | IP100027174 | DVHNLDYK                  | 18.8 | 623.7592 | 2 | -0.002953   | -2.369   | 641  | 649  |
| Isolated 1 of Fibroblast growth factor receptor 3                                      | IP100027174 | DVHNLDYK                  | 26.2 | 458.8737 | 3 | -0.002529   | -1.84    | 641  | 650  |
| Isolated 1 of Lck-interacting transmembrane adapter 1                                  | IP100646802 | SPQEPQQGKTEVTPAAQVDVLYSR  | 28.7 | 903.437  | 3 | 0.003471    | 1.281    | 179  | 202  |
| Cell division protein kinase 5                                                         | IP100023530 | IGEGTYGVVYK               | 31.1 | 626.2853 | 2 | -0.002553   | -2.04    | 10   | 20   |
| Isolated 2 of Homeodomain-interacting protein kinase 2                                 | IP100215949 | AVCSYTLR                  | 31.4 | 632.7725 | 2 | -0.001419   | -1.122   | 356  | 365  |
| Isolated 1 of SLAM family member 7                                                     | IP100099863 | TILKEDPANTVYSLVEIPK       | 44.1 | 1099.553 | 2 | -0.0007534  | -0.3428  | 293  | 311  |
| Isolated 1 of Disks large homolog 3                                                    | IP100023343 | RDNEVDQDQYHFVPSR          | 38.5 | 672.625  | 3 | -0.0003294  | -0.1634  | 664  | 679  |
| SHC-transforming protein 1 isoform 3                                                   | IP100021326 | ELFDPPSYVNVQNLDK          | 40.6 | 988.4395 | 2 | 0.003047    | 1.542    | 421  | 436  |
| Pituitary tumor-transforming gene 1 protein-interacting protein                        | IP100023974 | YLKFEENPYR                | 20.8 | 783.8531 | 2 | 0.00004658  | 0.02973  | 165  | 176  |
| Isolated 1 of Homeodomain-interacting protein kinase 3                                 | IP100099522 | TVCSYTLQR                 | 32.7 | 647.7783 | 2 | -0.0004187  | -0.3235  | 354  | 363  |
| Tyrosine-protein kinase JAK2                                                           | IP100031016 | REVGDYQGHTEVLLK           | 28.2 | 689.3361 | 3 | -0.001929   | -0.9339  | 565  | 581  |
| B- and T-lymphocyte attenuator                                                         | IP100376243 | NVKEAPTEYSICVR            | 28.1 | 908.9183 | 2 | -0.0006187  | -0.3406  | 274  | 288  |
| Histone-lysine N-methyltransferase SETD1A                                              | IP100179016 | EVFAR                     | 18.2 | 401.6807 | 2 | 0.004647    | 5.791    | 95   | 100  |
| Isolated 1 of Glycogen synthase kinase-3 beta                                          | IP100028570 | QLVRGEPNVSYICSR           | 18.8 | 619.9611 | 3 | 0.001005    | 0.5411   | 206  | 220  |
| Uncharacterized protein                                                                | IP100743873 | VDLTLSPK                  | 18.7 | 533.281  | 2 | -0.004653   | -4.367   | 263  | 271  |
| Isolated SNAP-23a of Synaptosomal-associated protein 23                                | IP100010438 | NFEKGAQYK                 | 14.6 | 602.2239 | 2 | -0.007785   | -6.469   | 92   | 100  |
| Isolated 2 of Mediator of RNA polymerase II transcription subunit 8                    | IP100300278 | MPGCIKINIK                | 21   | 584.7941 | 2 | 0.001147    | 0.9812   | 250  | 259  |
| Isolated 2 of Zinc finger protein 419                                                  | IP100291674 | sREAFHAGK                 | 20   | 541.7479 | 2 | 0.01065     | 9.835    | 160  | 168  |
| Mitochondrial fission regulator 1                                                      | IP100016699 | KPYGSIR                   | 16.3 | 437.6946 | 2 | 0.00004658  | 0.05327  | 28   | 34   |
| Tax_Id=9606 Gene_Symbol=CDK1 Uncharacterized protein                                   | IP100985068 | IGEGTYGVVYKGR             | 22.9 | 739.8552 | 2 | -0.0009534  | -0.6448  | 0    | 0    |
| E3 ubiquitin-protein ligase MARCH2                                                     | IP100296880 | DGRLLSTVIR                | 16.9 | 403.8805 | 3 | -0.008329   | -6.886   | 44   | 53   |
| Isolated 4 of Heterochromatin protein 1-binding protein 3                              | IP100448752 | VEDAMPTR                  | 15.8 | 403.156  | 3 | 0.006739    | 5.581    | 34   | 42   |
| 64 kDa protein                                                                         | IP100065388 | VAENEAQR                  | 18.2 | 558.7285 | 2 | 0.01033     | 9.523    | 117  | 125  |
| Fas apoptotic inhibitory molecule 3                                                    | IP100023119 | SQNNIYSACPR               | 38.5 | 695.2845 | 2 | 0.00008127  | 0.05849  | 310  | 320  |
| Isolated 1 of Fibroblast growth factor receptor 3                                      | IP100027174 | DVHNLDYK                  | 24.2 | 727.7901 | 2 | -0.002485   | -1.708   | 641  | 650  |
| Elongation factor 1-alpha 1                                                            | IP100396485 | STTTGHLIYK                | 14.3 | 600.7855 | 2 | -0.002453   | -2.044   | 21   | 30   |
| Isolated 1 of Leucine-rich repeat-containing protein 16A                               | IP100014843 | ssGFLNLIK                 | 18.6 | 569.751  | 2 | 0.0001151   | 0.1011   | 1067 | 1075 |
| Isolated 2 of Receptor-type tyrosine-protein phosphatase alpha                         | IP100221067 | VYQVIEDAFSDYANFK          | 49.6 | 994.9364 | 2 | -0.002253   | -1.133   | 778  | 793  |
| Mitogen-activated protein kinase 1                                                     | IP100003479 | VADPDHDTGFLTEYVATR        | 31.4 | 741.9929 | 3 | -0.006729   | -3.026   | 173  | 191  |
| Toll-like protein 2                                                                    | IP100465231 | LKAEVQYK                  | 19.6 | 498.7614 | 2 | 0.002847    | 2.857    | 893  | 900  |
| Protein transport protein Sec61 subunit beta                                           | IP100220835 | PGPTPSGTNYGSSGRSPSK       | 17.7 | 617.2849 | 3 | -0.004029   | -2.178   | 2    | 20   |
| Isolated A of Probable tubulin polyglutamylase TTL1                                    | IP100302599 | LKPWLIEVNASPILSTANDRIK    | 13.9 | 567.5043 | 5 | 0.006219    | 2.195    | 320  | 344  |
| Uncharacterized protein                                                                | IP100967678 | IVLGGPWNVGLTLTK           | 15.1 | 494.0284 | 4 | 0.004195    | 2.126    | 88   | 105  |
| Isolated APP770 of Amyloid beta A4 protein (Fragment)                                  | IP100006608 | MQQNGYENPTYK              | 29.4 | 776.809  | 2 | -0.003153   | -2.031   | 752  | 763  |
| Proto-oncogene tyrosine-protein kinase Yes                                             | IP100013981 | LIEDNEYTR                 | 41.8 | 652.2806 | 2 | -0.002753   | -2.112   | 420  | 429  |
| Isolated 1 of SLAM family member 7                                                     | IP100099863 | ETPNKIHSGENTYDTPHTR       | 16.7 | 921.384  | 3 | -0.001399   | -0.567   | 270  | 292  |
| Isolated 1 of Protein BAPN                                                             | IP100167773 | QNIYVYK                   | 19.5 | 441.229  | 2 | 0.001447    | 1.641    | 159  | 165  |
| Isolated p59-HCK of Tyrosine-protein kinase HCK                                        | IP100029769 | VEDNEYTR                  | 21.1 | 645.2717 | 2 | -0.004853   | -3.764   | 384  | 393  |
| Isolated IA of Tyrosine-protein kinase ABL1                                            | IP100216969 | LMTGDYAHAGAK              | 40.5 | 758.8271 | 2 | -0.003453   | -2.277   | 387  | 400  |
| <b>LPI</b>                                                                             |             |                           |      |          |   |             |          |      |      |
| Microtubule-associated protein 1B                                                      | IP100008868 | ESSRYSPTSDSNAVK           | 27.9 | 991.9377 | 2 | 0.005047    | 2.545    | 1791 | 1808 |
| Microtubule-associated protein 1B                                                      | IP100008868 | TPDTSTYCYETAEK            | 36.7 | 873.335  | 2 | 0.001381    | 0.7913   | 2034 | 2047 |
| RhoA activator C11orf59                                                                | IP100016670 | ALNGAEPNYSLSPSAR          | 41.4 | 888.9068 | 2 | -0.0001534  | -0.08635 | 32   | 47   |
| Tyrosine-protein kinase Mer                                                            | IP100029756 | IYSGDYR                   | 38   | 558.7233 | 2 | -0.0004534  | -0.4061  | 748  | 755  |
| Tyrosine-protein kinase Mer                                                            | IP100029756 | KIYSGDYR                  | 23.2 | 662.7531 | 2 | -0.002185   | -1.65    | 747  | 755  |
| Tyrosine-protein kinase Mer                                                            | IP100029756 | KIYSGDYR                  | 33.3 | 622.7708 | 2 | -0.0004534  | -0.3643  | 747  | 755  |
| Insulin receptor precursor                                                             | IP100025803 | DIYETDYRK                 | 36.3 | 723.303  | 2 | 0.0001466   | 0.1014   | 1203 | 1212 |
| Isolated 1 of Glycogen synthase kinase-3 beta                                          | IP100028570 | GEPNVSYICSR               | 45.8 | 681.2814 | 2 | -0.00001873 | -0.01375 | 210  | 220  |
| Isolated 1 of Glycogen synthase kinase-3 beta                                          | IP100028570 | QLVRGEPNVSYICSR           | 42.8 | 619.9606 | 3 | -0.0004947  | -0.2663  | 206  | 220  |
| SHC-transforming protein 1 isoform 3                                                   | IP100021326 | ELFDPPSYVNVQNLDK          | 63.2 | 988.4379 | 2 | -0.0001534  | -0.07765 | 421  | 436  |
| Isolated 1 of Docking protein 1                                                        | IP100015287 | SHNSALYSVQYK              | 35   | 481.2203 | 3 | -0.0007294  | -0.506   | 443  | 454  |
| Isolated 1 of Docking protein 1                                                        | IP100015287 | VKEEGYELPNATDDYAVPPPR     | 43.4 | 900.743  | 3 | -0.008729   | -3.233   | 393  | 415  |
| Mitogen-activated protein kinase 3                                                     | IP100018195 | IADPEHDTGFLTEYVATR        | 50.3 | 751.3388 | 3 | -0.0003294  | -0.1463  | 190  | 208  |
| breast cancer anti-estrogen resistance protein 1 isoform 4                             | IP100011998 | AQQGLYQVPGSPQSPPAK        | 30.8 | 769.0368 | 3 | -0.005729   | -2.486   | 123  | 143  |
| Isolated 1 of Disintegrin and metalloproteinase domain-containing protein 9            | IP100440932 | FAPVRYAK                  | 27.4 | 524.2503 | 2 | 0.002247    | 2.145    | 773  | 781  |
| Proto-oncogene tyrosine-protein kinase Yes                                             | IP100013981 | LIEDNEYTR                 | 42.5 | 652.2819 | 2 | -0.0001534  | -0.1177  | 420  | 429  |
| Isolated 1 of Glucocorticoid receptor DNA-binding factor 1                             | IP100334715 | NEENIYSVPHDSTQSK          | 15.8 | 676.2847 | 3 | 0.0004706   | 0.2322   | 1099 | 1115 |
| Isolated 1 of Girdin                                                                   | IP100171134 | KTEDYFISAGKPTPGTGK        | 27.5 | 765.0302 | 3 | 0.0008706   | 0.3797   | 1760 | 1780 |
| Isolated 3 of CD99 antigen-like protein 2                                              | IP100152488 | YSLTLQSAEPPPPPEPARI       | 28.6 | 756.6947 | 3 | -0.0003294  | -0.1452  | 171  | 190  |
| Isolated 2 of Semaphorin-6D                                                            | IP100170551 | EASLYSPSTLPR              | 39.6 | 749.3533 | 2 | 0.0007466   | 0.4985   | 851  | 863  |
| Isolated 1 of Dual specificity tyrosine-phosphorylation-regulated kinase 1B            | IP100000352 | IVQYIQR                   | 42   | 575.7684 | 2 | 0.0002466   | 0.2143   | 270  | 277  |
| Isolated 1 of Lck-interacting transmembrane adapter 1                                  | IP100646802 | SPQEPQQGKTEVTPAAQVDVLYSR  | 57.7 | 903.4359 | 3 | 0.0001706   | 0.06298  | 179  | 202  |
| Isolated 1 of Lck-interacting transmembrane adapter 1                                  | IP100646802 | TEVTPAAQVDVLYSR           | 79.3 | 864.9144 | 2 | 0.001047    | 0.6054   | 188  | 202  |
| Tubulin-folding cofactor B                                                             | IP100293126 | LGEYEDYSR                 | 32.2 | 574.2372 | 2 | 0.0003466   | 0.302    | 95   | 103  |
| Tubulin-folding cofactor B                                                             | IP100293126 | LGEYEDYSRVEK              | 24.1 | 752.3403 | 2 | 0.0005466   | 0.3635   | 95   | 106  |
| Syndecan-1                                                                             | IP100002441 | QANGGAYKQPTKQEFYK         | 32.4 | 1055.468 | 2 | 0.0008466   | 0.4012   | 293  | 310  |
| Isolated Alpha of Paxillin                                                             | IP100220030 | FHQHQSSSPVYSSAK           | 18.5 | 676.6462 | 3 | 0.001771    | 0.8731   | 76   | 93   |
| Isolated Alpha of Paxillin                                                             | IP100220030 | VGEEHYVFPNK               | 36.4 | 807.8468 | 2 | 0.002747    | 1.701    | 111  | 123  |
| Isolated Alpha of Paxillin                                                             | IP100220030 | VGEEHYVFPNKQK             | 18.8 | 624.2845 | 3 | 0.001771    | 0.9464   | 111  | 125  |
| Isolated 7 of Partitioning defective 3 homolog                                         | IP100045423 | FSPDSQYIDNR               | 37.2 | 711.2908 | 2 | 0.0009466   | 0.6659   | 382  | 392  |

|                                                                                        |              |                              |      |          |   |             |          |      |      |
|----------------------------------------------------------------------------------------|--------------|------------------------------|------|----------|---|-------------|----------|------|------|
| Isoform 1 of Fibroblast growth factor receptor 3                                       | IP100027174  | DVHNLDYK                     | 22.9 | 458.8745 | 3 | -0.0001294  | -0.09415 | 641  | 650  |
| Isoform 1 of Protein CDV3 homolog                                                      | IP100014197  | KTPQGPPEIVSDTQFSLQSTAK       | 42.1 | 1300.619 | 2 | 0.002347    | 0.9024   | 181  | 203  |
| Isoform 1 of Protein CDV3 homolog                                                      | IP100014197  | LQLDNQYAVLENK                | 43.7 | 878.4201 | 2 | 0.001447    | 0.8239   | 238  | 251  |
| Cell division protein kinase 3                                                         | IP100023503  | IGEGTYGVVYK                  | 26.7 | 633.2941 | 2 | -0.0005534  | -0.4373  | 38   | 48   |
| Cell division protein kinase 3                                                         | IP100023503  | IGEGTYGVVYK                  | 31   | 673.278  | 2 | 0.0009151   | 0.6801   | 38   | 48   |
| Cell division protein kinase 3                                                         | IP100023503  | VEKIGEGTYGVVYK               | 44   | 541.2677 | 3 | 0.001071    | 0.6601   | 35   | 48   |
| Isoform p59-HCK of Tyrosine-protein kinase HCK                                         | IP100029769  | VEDNEYTAREGAK                | 35   | 837.8739 | 2 | 0.003347    | 1.998    | 384  | 397  |
| Putative uncharacterized protein                                                       | IP100103810  | AGIASRLSPR                   | 21.3 | 588.2495 | 2 | -0.005285   | -4.496   | 15   | 24   |
| Putative uncharacterized protein DKFZp686L20222                                        | IP100026689  | IEKIGEGTYGVVYK               | 36.5 | 858.3878 | 2 | -0.001185   | -0.6906  | 7    | 20   |
| Putative uncharacterized protein DKFZp686L20222                                        | IP100026689  | IEKIGEGTYGVVYK               | 37.4 | 545.9396 | 3 | 0.001071    | 0.6545   | 7    | 20   |
| Putative uncharacterized protein DKFZp686L20222                                        | IP100026689  | IGEGTYGVVYKGR                | 28.7 | 739.8553 | 2 | -0.0007534  | -0.5095  | 10   | 22   |
| Putative uncharacterized protein DKFZp686L20222                                        | IP100026689  | IGEGTYGVVYKGR                | 45.3 | 779.8397 | 2 | 0.001715    | 1.1      | 10   | 22   |
| Isoform 2 of Plakophilin-2                                                             | IP100005264  | SPVPKTYDMLK                  | 23.9 | 679.8245 | 2 | -0.001053   | -0.7754  | 102  | 112  |
| Isoform 1 of T-cell-specific surface glycoprotein CD28                                 | IP100022339  | LLHSDYMNMTPR                 | 55.7 | 779.3323 | 2 | -0.001753   | -1.126   | 186  | 197  |
| Pituitary tumor-transforming gene 1 protein-interacting protein                        | IP100023974  | YGLFKEENPYAR                 | 29.4 | 522.904  | 3 | -0.001429   | -0.9124  | 165  | 176  |
| Isoform 1 of Abl interactor 1                                                          | IP100431025  | NTPYKTLPEVKKPTVPNDYMTSPAR    | 37.6 | 992.7911 | 3 | -0.002961   | -0.9948  | 195  | 219  |
| Isoform 1 of Abl interactor 1                                                          | IP100431025  | TLEPVKPTVPNDYMTSPAR          | 29.8 | 765.0352 | 3 | -0.002629   | -1.147   | 200  | 219  |
| Isoform 1 of Phosphatidylinositol-3,4,5-trisphosphate 5-phosphatase 2                  | IP100016932  | TLSVEDYAPAGPAR               | 56.2 | 763.8487 | 2 | 0.001347    | 0.882    | 1129 | 1142 |
| Isoform 1 of Homeodomain-interacting protein kinase 3                                  | IP100099522  | TVVSTYLQR                    | 20   | 647.7805 | 2 | 0.003981    | 3.075    | 354  | 363  |
| E3 ubiquitin-protein ligase CBL                                                        | IP100027269  | IKPSSANAIYSLAARLPVPVK        | 23.9 | 787.4294 | 3 | -0.0002294  | -0.0972  | 664  | 685  |
| Isoform Long of Plakophilin-4                                                          | IP100021076  | LHQHQLYVQDSDSNK              | 25.5 | 701.6496 | 3 | 0.0004971   | 2.364    | 1109 | 1124 |
| Isoform 1 of Protein phosphatase 1 regulatory subunit 12A                              | IP100183002  | SGSYLYLEER                   | 37.9 | 635.7534 | 2 | 0.0008466   | 0.6663   | 908  | 917  |
| Tyrosine-protein kinase Fer                                                            | IP100029263  | QEDGVYSSGLK                  | 60.1 | 703.796  | 2 | 0.001047    | 0.7441   | 708  | 720  |
| Isoform 1 of GRB2-associated-binding protein 1                                         | IP100031068  | APASVDSLLYNLPR               | 74.8 | 828.8843 | 2 | -0.001553   | -0.9376  | 249  | 263  |
| Isoform 1 of GRB2-associated-binding protein 1                                         | IP100031068  | DASSQDcyDIPR                 | 26.5 | 753.7828 | 2 | 0.001481    | 0.9832   | 399  | 410  |
| Isoform 1 of GRB2-associated-binding protein 1                                         | IP100031068  | KDASSQcyDIPR                 | 40.1 | 545.555  | 3 | -0.001395   | -0.8532  | 398  | 410  |
| Isoform 1 of GRB2-associated-binding protein 1                                         | IP100031068  | TASDTSQcyIPTAGMSPR           | 68.3 | 1092.436 | 2 | 0.002481    | 1.136    | 365  | 384  |
| Serine/threonine-protein kinase PRP4 homolog                                           | IP100013721  | LCDFGSASHVADNDITPYLVSR       | 50.1 | 839.7101 | 3 | 0.004005    | 1.591    | 832  | 853  |
| Isoform 3 of Intersectin-2                                                             | IP1000892957 | REEPEALAAVVK                 | 58.6 | 785.3667 | 2 | 0.001247    | 0.7941   | 961  | 973  |
| Isoform C1 of Heterogeneous nuclear ribonucleoproteins C1/C2                           | IP100216592  | WDDRYMYSYPAR                 | 14.1 | 560.5562 | 3 | -0.0004294  | -0.2557  | 118  | 129  |
| Isoform 1 of Kin of IRRE-like protein 1                                                | IP100470360  | TPYEAVDPGK                   | 39.7 | 667.2894 | 2 | 0.0001466   | 0.1099   | 719  | 729  |
| tyrosine-protein phosphatase non-receptor type 18 isoform 2                            | IP100152019  | SAEEAPLYK                    | 35.3 | 587.7551 | 2 | 0.0001466   | 0.1248   | 275  | 284  |
| tyrosine-protein phosphatase non-receptor type 18 isoform 2                            | IP100152019  | SAEEAPLYKYTR                 | 31.6 | 814.3903 | 2 | 0.0005466   | 0.3358   | 275  | 288  |
| Isoform 1 of Melanoma-associated antigen D1                                            | IP100328354  | GNPGVYQFSQAHNAK              | 25.7 | 562.2437 | 3 | 0.0004971   | 2.95     | 87   | 101  |
| Isoform 1 of Coiled-coil domain-containing protein 50                                  | IP100383423  | AYADSYEDGGMKPR               | 27.1 | 655.9297 | 3 | 0.001971    | 1.002    | 139  | 154  |
| Isoform 1 of Nischarin                                                                 | IP100032187  | LYLVNLDLR                    | 19.4 | 429.2252 | 3 | 0.005771    | 4.488    | 376  | 385  |
| Src substrate cortactin                                                                | IP100029601  | GPVSGTEPEPVYSMEADYR          | 67   | 1117.968 | 2 | -0.002553   | -1.143   | 435  | 454  |
| Src substrate cortactin                                                                | IP100029601  | TQTPVSPAPQTEELRPLSPVYEDAAASK | 57.5 | 1102.855 | 3 | -0.006429   | -1.944   | 399  | 428  |
| Isoform Beta-1A of Integrin beta-1                                                     | IP100217563  | WDTGENTPK                    | 29.3 | 651.7734 | 2 | -0.0008534  | -0.6552  | 775  | 784  |
| Isoform 1 of Protein-tyrosine kinase 2-beta                                            | IP100029702  | YLEDYKASVTR                  | 31.3 | 611.2649 | 3 | 0.001471    | 0.8028   | 573  | 586  |
| Interferon-induced protein 44                                                          | IP100291278  | LSLSLAR                      | 21.6 | 420.2246 | 2 | 0.003247    | 3.868    | 169  | 175  |
| Isoform 1 of Protein YIPF5                                                             | IP100334657  | QYAGDYDQQGR                  | 51.5 | 758.2987 | 2 | 0.00004658  | 0.03073  | 38   | 49   |
| SH2 domain-containing adapter protein B                                                | IP100017578  | LDYCGSSGEPGGVQR              | 42.2 | 816.3262 | 2 | -0.001119   | -0.6856  | 199  | 213  |
| Isoform 1 of Signal transducing adapter molecule 2                                     | IP100290542  | LVNEAPVYSYK                  | 25.8 | 774.8707 | 2 | -0.0003534  | -0.2282  | 364  | 376  |
| Isoform 1 of Roundabout homolog 1                                                      | IP100219798  | NGLTSTYAGIR                  | 25.2 | 616.7874 | 2 | 0.0003466   | 0.2812   | 926  | 936  |
| Isoform 1A of Tyrosine-protein kinase ABL1                                             | IP100216969  | LMTGDTYTAHAGAK               | 62.5 | 758.8229 | 2 | 0.0003466   | 0.2285   | 387  | 400  |
| Putative RNA-binding protein 3                                                         | IP100024320  | YDSDRPGYGGYGR                | 24.3 | 604.246  | 3 | 0.001271    | 0.7017   | 117  | 131  |
| Isoform 2 of Homeodomain-interacting protein kinase 1                                  | IP100302302  | AVVSTYLSR                    | 49.9 | 632.7734 | 2 | 0.0003813   | 0.3015   | 347  | 356  |
| Isoform 1 of Protein CDV3 homolog                                                      | IP100014197  | EDVYSLGR                     | 17.6 | 509.7162 | 2 | 0.0009466   | 0.9295   | 92   | 99   |
| Isoform 1 of Protein CDV3 homolog                                                      | IP100014197  | TPQGPPEIVSDTQFSLQSTAK        | 27.4 | 824.7181 | 3 | 0.006371    | 2.577    | 182  | 203  |
| Tyrosine-protein kinase Tec                                                            | IP100000878  | YVLDQYTSSSGAK                | 85.1 | 807.3412 | 2 | 0.001947    | 1.206    | 513  | 526  |
| Tyrosine-protein kinase Tec                                                            | IP100000878  | YVLDQYTSSSGAKFPVK            | 20.6 | 695.6598 | 3 | 0.007071    | 3.391    | 513  | 530  |
| Isoform 1 of Melanoma-associated antigen D1                                            | IP100328354  | YQNAKTKGNPGVYDQFSQAHNAK      | 47   | 809.707  | 3 | -0.002529   | -1.042   | 80   | 101  |
| Microtubule-associated protein 1B                                                      | IP100008868  | TPDSTYVETAEKTR               | 35.2 | 705.9713 | 3 | 0.005105    | 2.413    | 2034 | 2050 |
| Microtubule-associated protein 1B                                                      | IP100008868  | TSDVGVYK                     | 23   | 613.9122 | 3 | -0.001861   | -1.012   | 1898 | 1911 |
| Microtubule-associated protein 1B                                                      | IP100008868  | TTKSPDSGSySETIGK             | 31.2 | 990.8998 | 2 | 0.004615    | 2.33     | 1912 | 1928 |
| Microtubule-associated protein 1B                                                      | IP100008868  | TTSPPEVGSyYEKTR              | 27.5 | 670.9617 | 3 | 0.001271    | 0.6319   | 1963 | 1979 |
| breast cancer anti-estrogen resistance protein 1 isoform 4                             | IP100011998  | RPGRGLYVPR                   | 28.9 | 704.3431 | 2 | 0.0006466   | 0.4593   | 398  | 409  |
| Ankyrin repeat and SAM domain-containing protein 1A                                    | IP100395663  | IIASLADRPYEEPPQKPPR          | 44   | 753.0519 | 3 | 0.003171    | 1.405    | 825  | 843  |
| Isoform 1 of Ephrin type-B receptor 2                                                  | IP100021275  | ADSEYTDKQLQHYSGHmTPGKM       | 22.4 | 891.6846 | 3 | -0.0008759  | -0.3277  | 573  | 594  |
| Isoform 1 of Dynein heavy chain 8, axonemal                                            | IP100014845  | AVLLTGEQGTAKVMVK             | 15.9 | 457.2392 | 4 | -0.01461    | -7.999   | 2451 | 2467 |
| Isoform 1 of Rho guanine nucleotide exchange factor 6                                  | IP100014256  | LIEIER                       | 22.1 | 477.239  | 2 | 0.0002466   | 0.2586   | 696  | 702  |
| Coatomer subunit beta                                                                  | IP100295851  | LPGLMLTIR                    | 15.8 | 402.8964 | 3 | 0.006371    | 5.279    | 55   | 64   |
| Isoform 2 of HBS1-like protein                                                         | IP100168609  | VLSKLGK                      | 17.5 | 456.2509 | 2 | -0.001753   | -1.924   | 519  | 526  |
| Elongation factor 1-alpha 1                                                            | IP100396485  | EHALLATYLKQ                  | 25.4 | 697.8587 | 2 | 0.002047    | 1.467    | 135  | 146  |
| Heterogeneous nuclear ribonucleoprotein H                                              | IP100013881  | DLNycFSGMSDR                 | 44.5 | 841.3104 | 2 | -0.00001873 | -0.01114 | 263  | 275  |
| NADH dehydrogenase [ubiquinone] 1 beta subcomplex subunit 9                            | IP100255052  | AMYPDYFAKR                   | 20.6 | 671.288  | 2 | -0.001053   | -0.7852  | 113  | 122  |
| Isoform 3 of Putative RNA-binding protein 15                                           | IP100102752  | ERDYPFER                     | 19.1 | 677.777  | 2 | 0.0003466   | 0.2559   | 330  | 338  |
| Integral membrane protein DGCZR2/IDD                                                   | IP100024272  | MVPKADSGAFLLLLVLIVEPFRLEL    | 12.5 | 680.56   | 5 | -0.02581    | -7.595   | 1    | 29   |
| Isoform 2 of Receptor-type tyrosine-protein phosphatase alpha                          | IP100221067  | VVQEYDAFSDYANFK              | 39.1 | 994.9366 | 2 | -0.001853   | -0.9319  | 778  | 793  |
| Isoform 1 of Heterogeneous nuclear ribonucleoprotein K                                 | IP100216049  | GGDLMAYDR                    | 20.3 | 617.2579 | 2 | 0.0001466   | 0.1188   | 317  | 326  |
| Translin-2                                                                             | IP100550363  | GASQAGMTGyGMPR               | 24.1 | 732.2944 | 2 | 0.0006466   | 0.4418   | 183  | 196  |
| Isoform CSBP2 of Mitogen-activated protein kinase 14                                   | IP100002857  | HTDDEMTGyVATR                | 30.7 | 788.3108 | 2 | -0.0003534  | -0.2243  | 174  | 186  |
| Heterogeneous nuclear ribonucleoprotein F                                              | IP100003881  | FMSVQRPGYDRPGTAR             | 22.6 | 672.3151 | 3 | -0.001129   | -0.5605  | 201  | 217  |
| Isoform Long of Vacuolar protein sorting-associated protein 41 homolog                 | IP100028051  | KILVADSLKLLK                 | 22.8 | 730.3895 | 2 | 0.01422     | 9.738    | 762  | 773  |
| Isoform 1 of Disks large homolog 3                                                     | IP100023343  | RDNVEDGGQYHFVVSRR            | 21.2 | 672.6256 | 3 | 0.001471    | 0.7295   | 664  | 679  |
| Tax_id=9606 Gene_Symbol=DEAF1 Protein                                                  | IP100978688  | yPVLRS                       | 17.9 | 407.6969 | 2 | 0.0006466   | 0.7539   | 0    | 0    |
| Isoform 1 of DNA replication licensing factor MCM7                                     | IP100299904  | EAWASKDATYSAR                | 19.1 | 818.8542 | 2 | 0.0008466   | 0.5172   | 591  | 604  |
| Isoform p59-HCK of Tyrosine-protein kinase HCK                                         | IP100029769  | VEDNEYTAR                    | 27.5 | 645.2729 | 2 | -0.002453   | -1.903   | 384  | 393  |
| Transient receptor potential cation channel subfamily A member 1                       | IP100015963  | EVLTITRSK                    | 17.5 | 619.3487 | 2 | -0.001553   | -1.255   | 594  | 603  |
| Isoform 3 of Drebrin-like protein                                                      | IP100101968  | FDQVGPQAPVGVSYKQ             | 30.1 | 900.4246 | 2 | 0.005347    | 2.971    | 149  | 164  |
| Tubulin alpha-1B chain                                                                 | IP100930688  | IHFPLATYAPVISAEB             | 52.1 | 918.9696 | 2 | 0.002247    | 1.223    | 265  | 280  |
| Tubulin alpha-1B chain                                                                 | IP100930688  | VGINYQPTFPVPGDGLAK           | 25.3 | 952.978  | 2 | -0.003353   | -1.76    | 353  | 370  |
| Isoform 1 of Heterogeneous nuclear ribonucleoprotein R                                 | IP100012074  | STAYEDYHPPRR                 | 13.9 | 919.8741 | 2 | -0.001253   | -0.6817  | 428  | 441  |
| Isoform 1 of Heterogeneous nuclear ribonucleoprotein R                                 | IP100012074  | STAYEDYHPPRR                 | 16.4 | 959.8571 | 2 | -0.001585   | -0.826   | 428  | 441  |
| Isoform B1 of Heterogeneous nuclear ribonucleoproteins A2/B1                           | IP100396378  | NMGGYPGGNYGPGSGSGGGYGR       | 56.3 | 1135.44  | 2 | 0.0006466   | 0.2849   | 326  | 350  |
| Isoform 2 of Annexin A2                                                                | IP100418169  | LSLEGHSTPPSAyGSVK            | 20   | 962.9396 | 2 | 0.002947    | 1.531    | 29   | 46   |
| Insulin receptor precursor                                                             | IP100025803  | DIYETDYR                     | 15.5 | 659.2549 | 2 | -0.001053   | -0.7996  | 1203 | 1211 |
| Isoform Short of Heterogeneous nuclear ribonucleoprotein U                             | IP100479217  | GIFYEYENKYSR                 | 21.4 | 889.3765 | 2 | -0.001153   | -0.6488  | 237  | 249  |
| Isoform Alpha-2 of Mitogen-activated protein kinase 9                                  | IP100024673  | TACTNFMTYyVATR               | 20.1 | 936.395  | 2 | -0.006319   | -3.376   | 175  | 189  |
| Pyruvate dehydrogenase E1 component subunit alpha, testis-specific form, mitochondrion | IP100024087  | YHGHSMDPGVSYR                | 19.3 | 876.8143 | 2 | -0.002385   | -1.361   | 287  | 300  |
| Pyruvate dehydrogenase E1 component subunit alpha, testis-specific form, mitochondrion | IP100024087  | YHGHSMDPGVSYR                | 28.4 | 836.8315 | 2 | -0.001553   | -0.9885  | 287  | 300  |
| Actin-related protein 10                                                               | IP100302690  | PLYGLSGGGEK                  | 25.1 | 643.785  | 2 | -0.003953   | -3.073   | 2    | 13   |
| Isoform 1 of SLAM family member 7                                                      | IP100099863  | ETPNICPHSGENEDYTPHTR         | 16.5 | 921.3895 | 3 | 0.0020505   | 0.907    | 270  | 292  |
| Isoform 1 of SLAM family member 7                                                      | IP100099863  | TILKEDANVYSTVEIKP            | 40.7 | 1099.554 | 2 | 0.001247    | 0.5671   | 293  | 311  |

|                                                                            |             |                                   |      |          |   |             |          |      |      |
|----------------------------------------------------------------------------|-------------|-----------------------------------|------|----------|---|-------------|----------|------|------|
| Isomorf A1-B of Heterogeneous nuclear ribonucleoprotein A1                 | IP100215965 | SsPGYGGGGYFAKPR                   | 21.4 | 854.8771 | 2 | -0.001153   | -0.675   | 337  | 352  |
| Calmodulin                                                                 | IP100075248 | VDFKDGNGYISAAELR                  | 54.6 | 917.9216 | 2 | -0.001353   | -0.7376  | 92   | 107  |
| Isomorf C1 of Heterogeneous nuclear ribonucleoproteins C1/C2               | IP100216592 | MySYPAR                           | 25.9 | 484.1904 | 2 | -0.0007534  | -0.7788  | 123  | 129  |
| Hypothetical gene supported by AB033109                                    | IP100375208 | ARYTFGKPVAGALINMTVGVGVYSHEVGRPVLK | 7.12 | 646.5016 | 6 | 0.01084     | 2.799    | 240  | 274  |
| Elongation factor 1-alpha 1                                                | IP100396485 | STTTGHLGK                         | 19.9 | 600.7841 | 2 | -0.002553   | -4.376   | 21   | 30   |
| Isomorf 1 of ATP-binding cassette sub-family A member 6                    | IP100295640 | LTAGIR                            | 25.4 | 406.2093 | 2 | 0.003847    | 4.741    | 1413 | 1419 |
| Isomorf 1 of Abi interactor 1                                              | IP100431025 | NPKYKTLPEVQKVPVVDYMTSPAR          | 17   | 998.1237 | 3 | -0.00007951 | -0.02537 | 195  | 219  |
| Isomorf Long of Transcription intermediary factor 1-alpha                  | IP100005184 | KREGLVK                           | 21.7 | 427.7217 | 2 | -0.002353   | -2.754   | 893  | 899  |
| RING finger protein 169                                                    | IP100456899 | AmKITTVNLSVLPQNSVLGGVLK           | 14   | 612.0598 | 4 | -0.002552   | -2.148   | 567  | 588  |
| Isomorf 1 of Docking protein 1                                             | IP100015287 | IAPQSQDLSYSDPLDSTSAQAGEGVQR       | 22.4 | 1010.443 | 3 | -0.002595   | -1.748   | 305  | 332  |
| Transferrin receptor protein 1                                             | IP100022462 | SAFNSLFGGEPLSYTR                  | 71.9 | 913.4088 | 2 | -0.005353   | -2.932   | 7    | 22   |
| Isomorf 1 of Phosphatidylinositol-3,4,5-trisphosphate 5-phosphatase 2      | IP100016932 | NSFNPAFYVLEGVPHQLLPEPPSPAR        | 28.8 | 1061.845 | 3 | -0.009629   | -3.025   | 979  | 1006 |
| Isomorf Long of Plakophilin-4                                              | IP100021076 | NYALNTTAYEAPYPIQYR                | 24.5 | 867.0656 | 3 | -0.01543    | -5.936   | 468  | 488  |
| cDNA FLJ57345, highly similar to Serine/threonine-protein kinase 32A       | IP100746239 | ETQTtMAGTKPYMAPEmFSSR             | 18.2 | 648.0367 | 4 | 0.01766     | 6.823    | 174  | 195  |
| Isomorf 1 of Anoctamin-2                                                   | IP100033553 | FPGYLnNFAGLIFmJALFISIVFGVIVYR     | 11.1 | 587.7957 | 6 | 0.02828     | 8.03     | 532  | 560  |
| Heparin cofactor 2                                                         | IP100879573 | VLKQDQVNTFDNFIAPVIGSAmGMSLGLK     | 10.2 | 565.6306 | 6 | 0.01713     | 5.054    | 140  | 170  |
| Cell division protein kinase 5                                             | IP100023530 | IGEGTYGVFK                        | 28.1 | 626.2847 | 2 | -0.003753   | -2.999   | 10   | 20   |
| Putative uncharacterized protein DKFZp686K14185                            | IP100470878 | EPGRPTTYHLPVNTSQQVEEDVSSPPQR      | 25.8 | 1138.196 | 3 | -0.007329   | -2.148   | 5    | 34   |
| Isomorf 1 of Disintegrin and metalloproteinase domain-containing protein 9 | IP100440932 | VSSQCLNLRAPAPAPLYSLt              | 23.2 | 1208.615 | 2 | -0.004653   | -1.926   | 797  | 819  |
| Isomorf 2 of Zinc finger CCH domain-containing protein 18                  | IP100293312 | GGQYENFR                          | 34.8 | 525.7031 | 2 | -0.005153   | -4.906   | 406  | 413  |
| Isomorf 1 of Serine/threonine-protein kinase 33                            | IP100302351 | TRPVPLVEMSQSSIGSAELSLER           | 13.7 | 767.1379 | 4 | -0.02921    | -9.527   | 32   | 59   |
| Interleukin-2 receptor subunit alpha                                       | IP100003101 | sGLYmLcGNsHsSWDnQcQTSSAR          | 8.31 | 772.4161 | 5 | -0.03818    | -9.897   | 60   | 88   |
| Isomorf 1 of ARF GTPase-activating protein GIT1                            | IP100384861 | LQPHFLTELEDDAITSVHPAGLYR          | 22.9 | 979.7999 | 3 | 0.003071    | 1.045    | 531  | 555  |
| Hepatocellular carcinoma-associated antigen 59                             | IP100433576 | NAEDCLYELPENIR                    | 44.5 | 908.3807 | 2 | -0.007919   | -4.361   | 63   | 76   |
| Isomorf 3 of Coiled-coil domain-containing protein 40                      | IP100288939 | TKFYKLLLR                         | 19.4 | 492.9245 | 3 | -0.002229   | -1.51    | 428  | 438  |
| Isomorf 1 of Ephrin type-B receptor 2                                      | IP100021275 | IYIDPFTYEDPNEAVR                  | 78.4 | 1011.445 | 2 | -0.006653   | -3.291   | 595  | 610  |
| Isomorf 1 of Ephrin type-B receptor 2                                      | IP100021275 | IYIDPFTYEDPNEAVREFAK              | 34.3 | 833.0469 | 3 | -0.006329   | -2.535   | 595  | 614  |
| <b>OPM2</b>                                                                |             |                                   |      |          |   |             |          |      |      |
| Isomorf Alpha of Caveolin-1                                                | IP100009236 | YVDESEHLYTVPIR                    | 57.4 | 864.9036 | 2 | 0.0005466   | 0.3162   | 6    | 19   |
| Isomorf Alpha of Caveolin-1                                                | IP100009236 | YVDESEHLYTVPIREQNGIYKPNK          | 18.4 | 1005.486 | 3 | 0.002471    | 0.8196   | 6    | 30   |
| Isomorf 1 of T-cell-specific surface glycoprotein CD28                     | IP100022339 | LLHSDYMMNTR                       | 43.7 | 779.3328 | 2 | -0.0007534  | -0.4837  | 186  | 197  |
| SHC-transforming protein 1 isoform 3                                       | IP100021326 | ELFDPDSPVNVQNLDK                  | 62.1 | 988.4397 | 2 | 0.003447    | 1.744    | 421  | 436  |
| Isomorf 1 of Girdin                                                        | IP100171134 | DSNPATLPR                         | 17.7 | 607.2642 | 2 | -0.003853   | -3.175   | 1795 | 1804 |
| Isomorf 1 of Girdin                                                        | IP100171134 | KNTDYTFISSAGKPTGTQGK              | 38.5 | 765.0294 | 3 | -0.001529   | -0.667   | 1760 | 1780 |
| Isomorf 1 of Phosphatidylinositol-3,4,5-trisphosphate 5-phosphatase 2      | IP100016932 | TLSEVDYAPAGPAR                    | 52.2 | 763.85   | 2 | 0.003947    | 2.585    | 1129 | 1142 |
| Syndecan-1                                                                 | IP100002441 | QANGGAYKPKTQEEFYA                 | 25.8 | 1055.468 | 2 | 0.0008466   | 0.4012   | 293  | 310  |
| Isomorf 2 of Probable palmitoyltransferase ZDHHC5                          | IP100216546 | GVSGPEPGTAPVLYGR                  | 31.3 | 817.8836 | 2 | 0.002247    | 1.374    | 565  | 580  |
| Isomorf 1 of Disintegrin and metalloproteinase domain-containing protein 9 | IP100440932 | HVSPVPREVPIANR                    | 22.2 | 697.9997 | 3 | 0.006839    | 3.269    | 756  | 772  |
| Ribosomal protein S27                                                      | IP100397358 | LVQSPNSYFMDVK                     | 30.6 | 804.3641 | 2 | 0.003347    | 2.082    | 88   | 100  |
| Transferrin receptor protein 1                                             | IP100022462 | SAFNSLFGGEPLSYTR                  | 61.3 | 913.4163 | 2 | 0.009647    | 5.283    | 7    | 22   |
| Putative uncharacterized protein DKFZp686K14185                            | IP100470878 | EPGRPTTYHLPVNTSQQVEEDVSSPPQR      | 26   | 1138.198 | 3 | -0.001329   | -0.3896  | 5    | 34   |
| Isomorf APP770 of Amyloid beta A4 protein (Fragment)                       | IP100006608 | MQNGYENPTYK                       | 44.3 | 776.8109 | 2 | 0.0006466   | 0.4164   | 752  | 763  |
| Structural maintenance of chromosomes protein 3                            | IP100219420 | GALTYGGYDTR                       | 26.6 | 627.263  | 2 | -0.001253   | -0.9999  | 662  | 672  |
| Isomorf 3 of NTF2-related export protein 2                                 | IP100641916 | SNYEGPHTSHSSPADR                  | 29.7 | 662.2229 | 3 | -0.002229   | -1.123   | 20   | 36   |
| G antigen 7                                                                | IP100008809 | STYVWPRR                          | 30   | 653.2915 | 2 | -0.001853   | -1.42    | 7    | 15   |
| Docking protein 2                                                          | IP100022602 | GQEEYAVPFDVAAR                    | 59.4 | 844.8688 | 2 | -0.001353   | -0.8014  | 294  | 308  |
| Isomorf 1 of Lck-interacting transmembrane adapter 1                       | IP100646802 | SPQEQQQKTEVTPAQVDVLYSR            | 74.6 | 903.4355 | 3 | -0.001209   | -0.3801  | 179  | 202  |
| Isomorf 1 of Lck-interacting transmembrane adapter 1                       | IP100646802 | TEVTPAQVDVLYSR                    | 61.9 | 864.9146 | 2 | 0.001447    | 0.8367   | 188  | 202  |
| Tax_Id=9606 Gene_Symbol=POLQ Isoform 2 of DNA polymerase theta             | IP101012356 | NLSFSPISLCSARK                    | 17.2 | 452.4735 | 4 | 0.01133     | 6.27     | 0    | 0    |
| Serine/threonine-protein kinase PRK4 homolog                               | IP100013721 | LDFGSAHVDNDITPTYLVSIR             | 35.9 | 839.7092 | 3 | 0.001305    | 0.5186   | 832  | 853  |
| Isomorf 1 of Homeodomain-interacting protein kinase 3                      | IP100099522 | TVcSTYLQSR                        | 39.1 | 647.7783 | 2 | -0.0004187  | -0.3235  | 354  | 363  |
| Isomorf 1 of Protein CDV3 homolog                                          | IP100014197 | KTPQGPPEYSDTQFSLQSTAK             | 44.6 | 867.4147 | 3 | 0.001171    | 0.4502   | 181  | 203  |
| Isomorf 1 of Protein CDV3 homolog                                          | IP100014197 | LQLDNDQVALENQK                    | 44   | 878.4204 | 2 | 0.002047    | 1.166    | 238  | 251  |
| Ribosomal protein S6 kinase alpha-3                                        | IP100020898 | GAMAATYSALNR                      | 47.7 | 653.2867 | 2 | 0.0004466   | 0.3421   | 701  | 712  |
| Cell division protein kinase 3                                             | IP100023503 | IGEGTYGVVYK                       | 29.1 | 633.2944 | 2 | 0.00004658  | 0.0368   | 38   | 48   |
| Cell division protein kinase 3                                             | IP100023503 | VEKIGEGTYGVVYK                    | 34.1 | 541.2674 | 3 | 0.0001706   | 0.1052   | 35   | 48   |
| 54 kDa protein                                                             | IP100375601 | QAEEDRDQMTAAEAAPQDVTYQLHSFTLR     | 35.1 | 922.9099 | 4 | -0.004605   | -1.249   | 431  | 462  |
| 54 kDa protein                                                             | IP100375601 | QSPHDEDPQAVTYAK                   | 21   | 883.3755 | 2 | 0.0006466   | 0.3662   | 389  | 403  |
| Isomorf 1 of SLAM family member 7                                          | IP100099863 | ETPNLPHSGENTGYOTIPHTRN            | 37.6 | 921.3881 | 3 | -0.001695   | -0.6136  | 270  | 292  |
| Isomorf 1 of SLAM family member 7                                          | IP100099863 | TILKEDPANTVYSTVPEK                | 73.4 | 1099.552 | 2 | -0.002753   | -1.253   | 293  | 311  |
| Isomorf Alpha of Paxillin                                                  | IP100220030 | VGEEHHYFPPNK                      | 19.4 | 538.8992 | 3 | -0.0005294  | -0.3279  | 111  | 123  |
| Isomorf Alpha of Paxillin                                                  | IP100220030 | VGEEHHYFPPNKQK                    | 18.9 | 624.2831 | 3 | -0.002429   | -1.299   | 111  | 125  |
| Insulin receptor precursor                                                 | IP100025803 | DIYETDYRK                         | 29.1 | 723.3036 | 2 | 0.001347    | 0.9315   | 1203 | 1212 |
| Isomorf 2 of Homeodomain-interacting protein kinase 1                      | IP100302302 | AVcSTYLQSR                        | 29.3 | 632.7736 | 2 | 0.0007813   | 0.6178   | 347  | 356  |
| Proto-oncogene tyrosine-protein kinase Yes                                 | IP100013981 | LIEDNEYTAR                        | 26.6 | 652.2818 | 2 | -0.0003534  | -0.2711  | 420  | 429  |
| Isomorf 1 of Disks large homolog 3                                         | IP100023343 | RDNVEDQDQYHFFVSR                  | 41.6 | 672.6249 | 3 | -0.0006294  | -0.3122  | 664  | 679  |
| Isomorf 1 of Glycogen synthase kinase-3 beta                               | IP100028570 | GEPNVSYLCSR                       | 45.8 | 681.2816 | 2 | 0.0003813   | 0.28     | 210  | 220  |
| Isomorf 1 of Glycogen synthase kinase-3 beta                               | IP100028570 | QLVRGEPNVSYLCSR                   | 39.1 | 619.9617 | 3 | 0.002805    | 1.51     | 206  | 220  |
| Isomorf 7 of Partitioning defective 3 homolog                              | IP100045423 | FPSPQGYIDNR                       | 35.6 | 711.2901 | 2 | -0.0004534  | -0.319   | 382  | 392  |
| Isomorf 1 of Docking protein 1                                             | IP100015287 | SHNSALSYQVQK                      | 48.9 | 721.3262 | 2 | -0.001953   | -1.355   | 443  | 454  |
| Isomorf 1 of Glucocorticoid receptor DNA-binding factor 1                  | IP100334715 | NEEENYSVPHDSTQK                   | 34.4 | 676.2848 | 3 | 0.0007706   | 0.3802   | 1099 | 1115 |
| Tax_Id=9606 Gene_Symbol=FGFR3-K650E FGFR3 Mutant                           | IP100000000 | DVHNLDYK                          | 22.9 | 623.7611 | 2 | 0.0008466   | 0.6792   | 0    | 0    |
| Tax_Id=9606 Gene_Symbol=FGFR3-K650E FGFR3 Mutant                           | IP100000000 | DVHNLDYK                          | 31.5 | 635.6108 | 3 | 0.0002706   | 0.142    | 0    | 0    |
| Isomorf 2 of Plakophilin-2                                                 | IP100005264 | AGTTATYEGRWGR                     | 25.1 | 753.3324 | 2 | 0.00147     | 2.754    | 113  | 125  |
| Isomorf 2 of Plakophilin-2                                                 | IP100005264 | SPVPKTYDMLK                       | 30.6 | 679.8257 | 2 | 0.001347    | 0.9911   | 102  | 112  |
| Putative uncharacterized protein DKFZp686L2022                             | IP100026689 | IKETIGEGTYGVVYK                   | 38.4 | 545.9388 | 3 | -0.001329   | -0.8127  | 7    | 20   |
| Putative uncharacterized protein DKFZp686L2022                             | IP100026689 | IGEGTYGVVYKGR                     | 34.8 | 739.8564 | 2 | 0.001447    | 0.9783   | 10   | 22   |
| Isomorf 1 of Dual specificity tyrosine-phosphorylation-regulated kinase 1B | IP100000352 | IYQYQSR                           | 37.5 | 575.7679 | 2 | -0.0007534  | -0.6549  | 270  | 277  |
| Isomorf 2 of Leukocyte immunoglobulin-like receptor subfamily B member 4   | IP100830045 | SPHDEDPQAVTYAK                    | 22.7 | 546.5668 | 3 | 0.001371    | 0.8369   | 348  | 361  |
| Talin-1                                                                    | IP100298994 | ALDYMLR                           | 26   | 562.7452 | 2 | -0.001553   | -1.381   | 67   | 74   |
| RhoA activator C11orf59                                                    | IP100016670 | ALNGAEPNYSLSGAR                   | 18.9 | 592.9401 | 3 | -0.0007294  | -0.4105  | 32   | 47   |
| Isomorf 7 of Serine/threonine-protein kinase MARK2                         | IP100290158 | DQNLNLYGVTPSPSGHSQGR              | 36   | 759.342  | 3 | 0.002071    | 0.9097   | 520  | 540  |
| Isomorf p59-HCK of Tyrosine-protein kinase HCK                             | IP100029769 | VIENDEYAREGAK                     | 25.2 | 837.874  | 2 | 0.003547    | 2.118    | 384  | 397  |
| cDNA FLJ1629, highly similar to Clathrin interactor 1                      | IP100291930 | tIDLGAHAHYGDKASPDQNAHTPQSSVK      | 26.9 | 812.8786 | 4 | 0.006695    | 2.061    | 284  | 314  |
| Ephrin type-B receptor 1                                                   | IP100008315 | EAVYSKDLQHYSTGR                   | 21.8 | 957.3962 | 2 | 0.002015    | 1.053    | 572  | 586  |
| Isomorf 2 of Rho guanine nucleotide exchange factor 10-like protein        | IP100478817 | NLLYEDARH                         | 34.6 | 605.7664 | 2 | 0.0002466   | 0.2037   | 149  | 157  |
| Isomorf 2 of Latrophilin-2                                                 | IP100017562 | SENEIDYK                          | 50.4 | 620.7437 | 2 | 0.003147    | 2.537    | 1344 | 1352 |
| tyrosine-protein phosphatase non-receptor type 18 isoform 2                | IP100152019 | SAEEAPLYSK                        | 22.9 | 587.7565 | 2 | 0.002947    | 2.509    | 275  | 284  |
| tyrosine-protein phosphatase non-receptor type 18 isoform 2                | IP100152019 | SAEEAPLYSKVTR                     | 17.1 | 543.2629 | 3 | 0.001371    | 0.842    | 275  | 288  |
| Isomorf 1 of Tight junction-associated protein 1                           | IP100010544 | NSPLPKTYATR                       | 25.5 | 737.3154 | 2 | 0.004281    | 2.905    | 344  | 355  |
| Tubulin-folding cofactor B                                                 | IP100293126 | LGEYEDVSR                         | 33.1 | 574.2379 | 2 | 0.001747    | 1.522    | 95   | 103  |
| Tubulin-folding cofactor B                                                 | IP100293126 | LGEYEDVSRVEK                      | 34.1 | 752.3398 | 2 | -0.0004534  | -0.3015  | 95   | 106  |
| Isomorf 1 of GRB2-associated-binding protein 1                             | IP100031068 | DASSQDcYDIPR                      | 34.1 | 753.7836 | 2 | 0.003081    | 2.045    | 399  | 410  |
| Vimentin                                                                   | IP100418471 | SLYASSPGVYATR                     | 36.3 | 754.8432 | 2 | 0.002247    | 1.489    | 51   | 64   |
| breast cancer anti-estrogen resistance protein 1 isoform 4                 | IP100011998 | RPGRLYDVR                         | 21.7 | 704.3433 | 2 | 0.001047    | 0.7435   | 398  | 409  |

|                                                                                           |              |                                     |      |          |   |             |          |      |      |
|-------------------------------------------------------------------------------------------|--------------|-------------------------------------|------|----------|---|-------------|----------|------|------|
| Isoform 1 of T-cell-specific surface glycoprotein CD28                                    | IP100022339  | HYQPYAPRR                           | 18.8 | 604.7666 | 2 | 0.001047    | 0.866    | 205  | 213  |
| Isoform 1 of Hepatocyte growth factor-regulated tyrosine kinase substrate                 | IP100006176  | yLNRYWEK                            | 21.6 | 723.2878 | 2 | 0.003315    | 2.293    | 329  | 337  |
| Isoform C1 of Heterogeneous nuclear ribonucleoproteins C1/C2                              | IP100216592  | DYDRMYSYFAR                         | 19.7 | 560.5566 | 3 | -0.0007294  | -0.4343  | 118  | 129  |
| Isoform A1-B of Heterogeneous nuclear ribonucleoprotein A1                                | IP100215965  | SSGYPGGGGQYFAKPR                    | 23.5 | 570.2545 | 3 | 0.0008706   | 0.5095   | 337  | 352  |
| Low-density lipoprotein receptor                                                          | IP100000070  | TTEDEVHGHNQDGYSPSR                  | 40.6 | 830.0024 | 3 | 0.005405    | 2.173    | 831  | 850  |
| Calmodulin                                                                                | IP100075248  | VFDKDGNGYISAALER                    | 38   | 612.2844 | 3 | 0.001371    | 0.747    | 92   | 107  |
| Putative uncharacterized protein DKFZp686L20222                                           | IP100026689  | IKIEGEGYGVYVK                       | 20.9 | 572.5945 | 3 | -0.0005609  | -0.3269  | 7    | 20   |
| Putative uncharacterized protein DKFZp686L20222                                           | IP100026689  | IGEGYGVYVK                          | 34.6 | 673.2784 | 2 | 0.001715    | 1.275    | 10   | 20   |
| Putative uncharacterized protein DKFZp686L20222                                           | IP100026689  | IGEGYGVYVKGR                        | 23.1 | 779.84   | 2 | 0.002315    | 1.485    | 10   | 22   |
| 54 kDa protein                                                                            | IP100375601  | QSPHDEQAVTYAKVK                     | 58.4 | 664.9749 | 3 | 0.003671    | 1.842    | 389  | 405  |
| Tax_Idx=9606 Gene_Symbol=FGFR3-K650E FGFR3 Mutant                                         | IP100000000  | DVHMLDyKETTNGR                      | 28.8 | 662.2678 | 3 | 0.004939    | 2.488    | 0    | 0    |
| Isoform 2 of Leukocyte immunoglobulin-like receptor subfamily B member 4                  | IP100830045  | SPHDEQAVTYAKVK                      | 41.2 | 622.288  | 3 | 0.001571    | 0.8422   | 348  | 363  |
| Isoform Long of Plakophilin-4                                                             | IP100021076  | AASPSYQRPASPTAIRK                   | 22.2 | 663.6422 | 3 | 0.001739    | 0.8744   | 271  | 287  |
| Isoform Long of Plakophilin-4                                                             | IP100021076  | LQHQQLYYSQDDSNRK                    | 22.4 | 701.6501 | 3 | 0.006471    | 3.077    | 1109 | 1124 |
| Isoform Long of Plakophilin-4                                                             | IP100021076  | TYSPVYR                             | 23.8 | 564.7422 | 2 | 0.001047    | 0.9274   | 419  | 426  |
| Insulin receptor precursor                                                                | IP100025803  | DIYETDYR                            | 29.2 | 659.2554 | 2 | -0.00005342 | -0.04055 | 1203 | 1211 |
| Insulin receptor precursor                                                                | IP100025803  | sVEEHPYTHMNGGK                      | 16   | 641.5784 | 3 | 0.002539    | 1.321    | 1374 | 1388 |
| Insulin receptor precursor                                                                | IP100025803  | sVEEHPYTHMNGGK                      | 19.7 | 684.2762 | 3 | 0.0009391   | 0.4579   | 1374 | 1389 |
| Isoform 1 of Protein-tyrosine kinase 2-beta                                               | IP100029702  | YIEDEDYKASVTR                       | 19.9 | 611.2656 | 3 | 0.003571    | 1.949    | 573  | 586  |
| Isoform 1 of Protein-tyrosine kinase 2-beta                                               | IP100029702  | YIEDEDYKASVTR                       | 45.7 | 956.3771 | 2 | 0.001915    | 1.002    | 573  | 586  |
| Hypothetical gene supported by AB033109                                                   | IP100375208  | ARYTFKGPVAGALTIMTVMGVYGVYsHEVGRPLRV | 10.5 | 646.5004 | 6 | 0.003643    | 0.9403   | 240  | 274  |
| Sodium-dependent phosphate transporter 2                                                  | IP100009504  | SDGHYHTVKDQSLGKY                    | 21.8 | 674.9736 | 3 | -0.0008294  | -0.41    | 339  | 355  |
| Transgelin-2                                                                              | IP1000550363 | GASQAGVHTYGMGR                      | 54.5 | 732.2949 | 2 | 0.001647    | 1.125    | 183  | 196  |
| Isoform 1 of Disks large homolog 1                                                        | IP100030351  | DYEVGDGRVHFVTSR                     | 20.2 | 646.9376 | 3 | -0.003629   | -1.872   | 752  | 766  |
| Bardet-Biedl syndrome 12 protein                                                          | IP100470599  | IALLKLEKINLTVAVLTPNVAQmQIK          | 10.8 | 634.5347 | 5 | -0.03153    | -9.95    | 488  | 515  |
| Isoform A of NT-3 growth factor receptor                                                  | IP100000824  | IPVIEPQYFR                          | 23.1 | 728.3557 | 2 | 0.0008466   | 0.5816   | 508  | 518  |
| Isoform Beta-1A of Integrin beta-1                                                        | IP100217563  | WDTGENPfyK                          | 22.5 | 651.7739 | 2 | 0.001466    | 0.1125   | 775  | 784  |
| Ephrin receptor                                                                           | IP100008290  | VLEDDPAAVTR                         | 58.9 | 780.3344 | 2 | -0.001153   | -0.7395  | 825  | 837  |
| Isoform 1 of Pleckstrin homology domain-containing family A member 7                      | IP100419933  | QGFQSGSLFPPENYQLPK                  | 44.2 | 1035.981 | 2 | 0.001247    | 0.6019   | 458  | 475  |
| Ephrin type-B receptor 1                                                                  | IP100008315  | EAVYSDKLGHySTGR                     | 23.4 | 611.9434 | 3 | -0.001129   | -0.6159  | 572  | 586  |
| Low-density lipoprotein receptor-related protein 6                                        | IP100000203  | sYSYRPySYR                          | 24.4 | 751.2799 | 2 | -0.002185   | -1.455   | 1514 | 1523 |
| Isoform 1 of Myelin protein zero-like protein 1                                           | IP100022558  | SLPSSGSHGQPVYIAQLDHSGGHSDKINK       | 22   | 787.376  | 4 | 0.001495    | 0.475    | 229  | 257  |
| Isoform Alpha of Paxillin                                                                 | IP100220030  | FIHQQQPSSSPYVGSASK                  | 19.8 | 676.6478 | 3 | 0.006571    | 3.24     | 76   | 93   |
| Docking protein 2                                                                         | IP100022602  | QSRPEMENEELYSsAVTVPGHK              | 36.3 | 867.0499 | 3 | 0.003405    | 1.31     | 128  | 149  |
| Isoform 1 of Sodium-coupled neutral amino acid transporter 5                              | IP100102509  | MNGALPSDAVGRQR                      | 31.4 | 922.4116 | 2 | 0.001466    | 0.0795   | 8    | 23   |
| Maternal embryonic leucine zipper kinase                                                  | IP100006471  | SAVKNEEYFMFPEPK                     | 31.5 | 948.4189 | 2 | 0.001947    | 1.027    | 431  | 445  |
| Isoform 1 of Protein LAP2                                                                 | IP100438286  | RAQIEPQDLSYR                        | 33.2 | 824.3782 | 2 | -0.003653   | -2.217   | 1096 | 1108 |
| Isoform 7 of Partitioning defective 3 homolog                                             | IP100045423  | EGHMDALYAKVK                        | 41.5 | 786.8327 | 2 | -0.0006534  | -0.4155  | 1036 | 1048 |
| E3 ubiquitin-protein ligase CBL                                                           | IP100027269  | IKPSSASGYSVLAARPLPVK                | 22.6 | 787.4296 | 3 | 0.0003706   | 0.157    | 664  | 685  |
| Isoform 3 of Drebrin-like protein                                                         | IP100101968  | FQDVGQAPVGSVYQK                     | 71.8 | 900.4216 | 2 | -0.0006534  | -0.363   | 149  | 164  |
| Isoform Alpha of Caveolin-1                                                               | IP100009236  | AMADELSEKQVYDAHTK                   | 18.3 | 672.6318 | 3 | 0.002671    | 1.325    | 31   | 47   |
| Isoform 2 of Catenin delta-2                                                              | IP100220032  | LVGTSKSK                            | 20   | 456.2514 | 2 | -0.0007534  | -0.8266  | 932  | 939  |
| Isoform 2 of Dual adapter for phosphotyrosine and 3-phosphotyrosine and 3-phosphotyrosine | IP100004301  | KVEEFSYsESVR                        | 28.9 | 758.3577 | 2 | -0.0009534  | -0.629   | 132  | 143  |
| breast cancer anti-estrogen resistance protein 1 isoform 4                                | IP100011998  | RPGGTLDVYRER                        | 26.6 | 564.9458 | 3 | 0.0008706   | 0.5143   | 398  | 411  |
| Isoform 7 of Partitioning defective 3 homolog                                             | IP100045423  | ERDYAEIQDFHR                        | 21.1 | 553.5699 | 3 | -0.0008294  | -0.5     | 994  | 1005 |
| Neutral amino acid transporter A                                                          | IP100015476  | SNETNGYLSAQAGAAAGGAPGATAAR          | 101  | 880.059  | 3 | 0.009271    | 3.514    | 4    | 31   |
| Protein sprouty homolog 1                                                                 | IP100306505  | GSNEYTEGSPVVKRPAR                   | 22.5 | 675.3245 | 3 | -0.0008294  | -0.4098  | 49   | 66   |
| Ras GTPase-activating-like protein IQGAP1                                                 | IP100009342  | LQQTAYALNSK                         | 21.8 | 658.8172 | 2 | 0.002447    | 1.858    | 1506 | 1516 |
| Cell division protein kinase 3                                                            | IP100023503  | VEKIEGEGYGVYVK                      | 50.5 | 851.3813 | 2 | 0.001515    | 0.8903   | 35   | 48   |
| Discoidin, CUB and LCLL domain-containing protein 1                                       | IP100337612  | AHTFSAGQSVRVQPQGHK                  | 21.6 | 551.2617 | 4 | 0.0007946   | 0.3608   | 612  | 631  |
| Low-density lipoprotein receptor                                                          | IP100000070  | TTEDEVHGHNQDGYSPSR                  | 26.5 | 856.6563 | 3 | 0.0007738   | 0.3013   | 831  | 850  |
| Serine palmitoyltransferase 1                                                             | IP100005745  | DHPALNINVSPPSHK                     | 33.4 | 642.6347 | 3 | -0.001129   | -0.5864  | 76   | 92   |
| Isoform 1 of Abi interactor 1                                                             | IP100431025  | NTPYKTLFVKPPTVNDYMTSPAR             | 39.4 | 992.7946 | 3 | 0.007539    | 2.533    | 195  | 219  |
| Isoform Long of Plakophilin-4                                                             | IP100021076  | NNYALNTTAYAEPPRPQYR                 | 41.4 | 867.0736 | 3 | 0.008571    | 3.297    | 468  | 488  |
| Discoidin, CUB and LCLL domain-containing protein 1                                       | IP100337612  | AVSALATTESGHPDQKPPHFGSDSYsAPR       | 18.3 | 807.8701 | 4 | -0.001005   | -0.3114  | 670  | 700  |
| 11 kDa protein                                                                            | IP100927694  | IPDAAGGTAGVGTmLLSFGINIVGLAVALRR     | 14.8 | 535.2925 | 6 | -0.01897    | -5.916   | 49   | 80   |
| Isoform A of Anion exchange protein 2                                                     | IP100383597  | LSVPSGFSYTAPEKR                     | 19.9 | 414.4622 | 4 | 0.006895    | 4.166    | 962  | 976  |
| Elongation factor 1-alpha 1                                                               | IP100396485  | EHALLAVLGLK                         | 23.9 | 697.8589 | 2 | 0.002447    | 1.754    | 135  | 146  |
| Isoform 1 of Hepatocyte growth factor-regulated tyrosine kinase substrate                 | IP100006176  | VEPCyEQNLNR                         | 18.6 | 774.3058 | 2 | 0.002416    | 1.561    | 211  | 221  |
| Isoform 1 of Hepatocyte growth factor-regulated tyrosine kinase substrate                 | IP100006176  | YKVVQDYQIMK                         | 25.4 | 798.379  | 2 | -0.003353   | -2.101   | 125  | 136  |
| Isoform 2 of Titin                                                                        | IP100023283  | HKIEVEHK                            | 17.6 | 544.2511 | 2 | 0.001647    | 1.514    | 9625 | 9632 |
| Isoform 1 of Importin-4                                                                   | IP100156374  | SLLLALQR                            | 17.9 | 547.8057 | 2 | 0.007047    | 6.438    | 82   | 90   |
| Pituitary tumor-transforming gene 1 protein-interacting protein                           | IP100023974  | YGLFKEENPYAR                        | 19.5 | 522.906  | 3 | 0.004571    | 2.917    | 165  | 176  |
| Cadherin-9                                                                                | IP100297180  | KIAGLIK                             | 20   | 405.7263 | 2 | -0.003353   | -4.138   | 36   | 42   |
| Isoform 2 of Annexin A2                                                                   | IP100418169  | LSLEGDSTPPSAYGSVK                   | 22.5 | 962.9391 | 2 | 0.001947    | 1.011    | 29   | 46   |
| Isoform Long of Vacuolar protein sorting-associated protein 41 homolog                    | IP100028051  | KILVADLSLILK                        | 19.9 | 730.3876 | 2 | 0.01042     | 7.135    | 762  | 773  |
| Transient receptor potential cation channel subfamily A member 1                          | IP100015963  | EVVLTIRSK                           | 18   | 619.3501 | 2 | 0.001247    | 1.007    | 594  | 603  |
| Isoform 1 of Disks large homolog 3                                                        | IP100023343  | DNEVDGQDYHFVRSR                     | 41.1 | 930.3849 | 2 | 0.002847    | 1.531    | 665  | 679  |
| Isoform 2 of Peptidyl-prolyl cis-trans isomerase NIMA-interacting 4                       | IP100006658  | FGYHIIIVEGR                         | 43.2 | 701.3223 | 2 | -0.001253   | -0.8943  | 145  | 155  |
| Isoform 2 of Peptidyl-prolyl cis-trans isomerase NIMA-interacting 4                       | IP100006658  | FGYHIIIVEGRK                        | 15.4 | 510.5825 | 3 | -0.0006294  | -0.4115  | 145  | 156  |
| Isoform CSBP2 of Mitogen-activated protein kinase 14                                      | IP100002857  | HTDDSEMGVATR                        | 22.5 | 788.31   | 2 | -0.001953   | -1.24    | 174  | 186  |
| Pyruvate dehydrogenase E1 component subunit alpha, testis-specific form, mitochondrion    | IP100024087  | YHGSHSDPQGVsYR                      | 26.6 | 558.2243 | 3 | 0.0009706   | 0.5803   | 287  | 300  |
| Chromosome 21 open reading frame 58, isoform CRA_a                                        | IP100956064  | QRIPETK                             | 19.8 | 470.2207 | 2 | 0.004447    | 4.733    | 4    | 10   |
| Tyrosine-protein kinase Fgr                                                               | IP100016871  | KLDGGYITTR                          | 39.4 | 749.346  | 2 | 0.003747    | 2.502    | 202  | 213  |
| Cell division protein kinase 5                                                            | IP100023530  | IGEGYGVTFVK                         | 27.1 | 626.2864 | 2 | -0.0003534  | -0.2824  | 10   | 20   |
| Kinesin light chain 2                                                                     | IP100021634  | AEEVEYYRR                           | 20   | 729.309  | 2 | 0.001147    | 0.7866   | 340  | 349  |
| Isoform 1 of Extended synaptotagmin-1                                                     | IP100022143  | HLSPYALLTVGDSSHK                    | 26   | 598.2805 | 3 | 0.0002706   | 0.1509   | 818  | 833  |
| Proto-oncogene tyrosine-protein kinase Yes                                                | IP100013981  | KLDNGYITTR                          | 27   | 740.8459 | 2 | 0.001147    | 0.7744   | 216  | 227  |
