# Supplementary material
Source: PubMed Central journal article supplement (PMC5032629)
Supplement: NIHMS808759-supplement-Supplementary_Table_2.pdf [file NIHMS808759-supplement-Supplementary_Table_2.pdf]

| Accession (IPI)                 | Protein                                                                       | Peptide Sequence         | Score              | Sequest:XCorr | Observed Mass | Charge | Delta AMU  | Delta PPM | Start | Stop |
|---------------------------------|-------------------------------------------------------------------------------|--------------------------|--------------------|---------------|---------------|--------|------------|-----------|-------|------|
| <b>K650E-FGFR3-Myr(+)-shCON</b> |                                                                               |                          |                    |               |               |        |            |           |       |      |
| IP100955014                     | Cyclin-dependent kinase 1 isoform 1                                           | IGEGTYGVVYK              | 30.97              | 3.7           | 633.2944943   | 2      | -0.000863  | -0.682    | 10    | 20   |
| IP100955014                     | Cyclin-dependent kinase 1 isoform 1                                           | IGEGTYGVVYK              | 84.78, 63.52       | 1.405         | 673.2778317   | 2      | -0.00052   | -0.386    | 10    | 20   |
| IP100152906                     | Histone H2B type 1-D                                                          | KEYSYVYVYK               | 95.92              | 1.883         | 673.3077389   | 2      | -0.000374  | -0.278    | 35    | 44   |
| IP100152906                     | Histone H2B type 1-D                                                          | ESYSVYVYK                | 60.18              | 1.762         | 609.2603146   | 2      | -0.000222  | -0.183    | 36    | 44   |
| IP100941201                     | Isoform 1 of Peptidyl-prolyl cis-trans isomerase NIMA-interacting 4           | FGYHIMVEGR               | 1,000.00           | 2.422         | 467.8847652   | 3      | -0.000481  | -0.343    | 120   | 130  |
| IP100000000                     | FGFR3 Mutant                                                                  | DVHNLDTYK                | 55.92              | 2.055         | 623.7612912   | 2      | 0.000131   | 0.105     | 641   | 649  |
| IP100216190                     | Isoform 2 of Glycogen synthase kinase-3 beta                                  | GEPNVSYLcSR              | 30.97              | 1.993         | 681.2816159   | 2      | -0.000685  | -0.503    | 210   | 220  |
| IP100515061                     | Histone H2B type 1-J                                                          | ESYSVYVYK                | 60.18              | 1.666         | 616.2684323   | 2      | 0.000313   | 0.254     | 36    | 44   |
| IP100916600                     | Uncharacterized protein                                                       | VFDKDGNGVISAEALR         | 84.46              | 1.651         | 612.2845455   | 3      | 0.000016   | 0.0871    | 139   | 154  |
| IP100414676                     | Heat shock protein HSP 90-beta                                                | SlyYITGESK               | 60.18              | 1.893         | 620.7791745   | 2      | 0.000197   | 0.159     | 482   | 491  |
| IP100304925                     | Heat shock 70 kDa protein 1A/1B                                               | TPPSYVAFTDTER            | 30.97              | 1.44          | 784.3378293   | 2      | -0.000393  | -0.251    | 37    | 49   |
| IP100014344                     | Isoform Long of Dual specificity tyrosine-phosphorylation-regulated kinase 1A | TYQYIQR                  | 72.58              | 1.409         | 575.7689206   | 2      | 0.00019    | 0.165     | 318   | 325  |
| IP100643041                     | GTP-binding nuclear protein Ran                                               | NLQYDISAK                | 27.96              | 2.027         | 647.7900387   | 2      | 0.000126   | 0.0973    | 143   | 152  |
| IP100023343                     | Isoform 1 of Disks large homolog 3                                            | RNEVDGQYHPVVSRR          | 182.72             | 2.941         | 672.6255489   | 3      | -0.00033   | -0.164    | 664   | 679  |
| IP100021634                     | Kinesin light chain 2                                                         | AEEVEYYR                 | 30.97              | 1.616         | 651.2586056   | 2      | 0.00036    | 0.276     | 340   | 348  |
| IP101014975                     | Talin 1                                                                       | ALDYMLR                  | 26.2               | 1.576         | 562.7464596   | 2      | -0.000132  | -0.118    | 67    | 74   |
| IP100302302                     | Isoform 2 of Homeodomain-interacting protein kinase 1                         | AVcSTYLQSR               | 30.97              | 1.609         | 632.7738034   | 2      | 0.0000899  | 0.0711    | 347   | 356  |
| IP100006482                     | Isoform Long of Sodium/potassium-transporting ATPase subunit alpha-1          | GIWVYTDGR                | 30.97              | 2.092         | 530.2478635   | 2      | 0.000175   | 0.166     | 256   | 264  |
| IP100166845                     | Isoform 3 of Tyrosine-protein kinase Fyn                                      | LIEDNEYAR                | 27.96              | 1.63          | 652.8265355   | 2      | 0.000255   | 0.196     | 359   | 368  |
| IP100221141                     | Isoform CSBP1 of Mitogen-activated protein kinase 14                          | HTDDEMTGYVATR            | 53.49              | 1.502         | 525.8768917   | 3      | -0.000202  | -0.128    | 174   | 186  |
| IP100644618                     | Isoform 4 of Myelin protein zero-like protein 1                               | SESVVYADIR               | 124.16             | 1.847         | 609.7742917   | 2      | 0.0000318  | 0.0261    | 134   | 143  |
| IP100022353                     | Non-receptor tyrosine-protein kinase TYK2                                     | LLAQAGEGPEYIR            | 1,000.00           | 1.828         | 800.3657834   | 2      | -0.00065   | -0.406    | 282   | 294  |
| <b>K650E-FGFR3-Myr(+)-shN1</b>  |                                                                               |                          |                    |               |               |        |            |           |       |      |
| IP100955014                     | Cyclin-dependent kinase 1 isoform 1                                           | IGEGTYGVVYK              | 30.97              | 2.127         | 633.2951047   | 2      | 0.000358   | 0.283     | 10    | 20   |
| IP100955014                     | Cyclin-dependent kinase 1 isoform 1                                           | IGEGTYGVVYK              | 103.68, 83.70      | 2.704         | 673.2778317   | 2      | -0.00052   | -0.386    | 10    | 20   |
| IP100955014                     | Cyclin-dependent kinase 1 isoform 1                                           | IEKIGEGYGVVYK            | 99.09, 74.47       | 1.903         | 572.5949092   | 3      | -0.00098   | -0.571    | 7     | 20   |
| IP100152906                     | Histone H2B type 1-D                                                          | KEYSYVYVYK               | 60.18              | 2.257         | 609.2605588   | 2      | 0.000266   | 0.218     | 36    | 44   |
| IP100152906                     | Histone H2B type 1-D                                                          | KEYSYVYVYK               | 81.61              | 2.22          | 673.3083493   | 2      | 0.000947   | 0.629     | 35    | 44   |
| IP100941201                     | Isoform 1 of Peptidyl-prolyl cis-trans isomerase NIMA-interacting 4           | FGYHIMVEGR               | 1000               | 3.735         | 467.8848262   | 3      | -0.000298  | -0.213    | 120   | 130  |
| IP100941201                     | Isoform 1 of Peptidyl-prolyl cis-trans isomerase NIMA-interacting 4           | FGYHIMVEGR               | 1,000.00, 1,000.00 | 2.068         | 473.2164608   | 3      | -0.000309  | -0.218    | 120   | 130  |
| IP100000000                     | FGFR3 Mutant                                                                  | DVHNLDTYK                | 27.96              | 3.089         | 416.1764827   | 3      | -0.000828  | -0.665    | 641   | 649  |
| IP100000000                     | FGFR3 Mutant                                                                  | DVHNLDTYKETTGNLPLVK      | 40.66              | 4.309         | 586.2852778   | 4      | -0.00079   | -0.337    | 641   | 659  |
| IP100107040                     | Isoform Long of Splicing factor, proline- and glutamine-rich                  | FAQHGTFEYEQSR            | 53.49              | 2.086         | 614.9215694   | 3      | 0.000232   | 0.126     | 480   | 490  |
| IP100216190                     | Isoform 2 of Glycogen synthase kinase-3 beta                                  | GEPNVSYLcSR              | 30.97              | 2.489         | 681.2816769   | 2      | -0.000563  | -0.413    | 210   | 223  |
| IP100515061                     | Histone H2B type 1-J                                                          | KEYSYVYVYK               | 95.92              | 2.34          | 680.3159787   | 2      | 0.000406   | 0.298     | 35    | 44   |
| IP100515061                     | Histone H2B type 1-J                                                          | ESYSVYVYK                | 60.18              | 1.47          | 616.2686764   | 2      | 0.000801   | 0.651     | 36    | 44   |
| IP100797148                     | Isoform 2 of Heterogeneous nuclear ribonucleoprotein A1                       | SSGPGYGGQYFAKRR          | 110.78             | 2.124         | 570.245162    | 3      | -0.000728  | -0.426    | 232   | 247  |
| IP100032830                     | Isoform 1 of Oligoribonuclease, mitochondrial (Fragment)                      | RWYPEEYFAK               | 118.24             | 2.752         | 565.5803218   | 3      | -0.000311  | -0.184    | 178   | 189  |
| IP100916600                     | Uncharacterized protein                                                       | VFDKDGNGVISAEALR         | 102.46             | 4.852         | 612.2843013   | 3      | -0.000573  | -0.312    | 139   | 154  |
| IP100418471                     | Vimentin                                                                      | SLYASSPGGVYAIR           | 0                  | 1.803         | 754.8431393   | 2      | -0.000173  | -0.115    | 51    | 64   |
| IP100418471                     | Vimentin                                                                      | FANVLDKVR                | 1000               | 1.842         | 603.2900387   | 2      | 0.000226   | 0.187     | 114   | 122  |
| IP100414676                     | Heat shock protein HSP 90-beta                                                | SlyYITGESK               | 60.18              | 2.189         | 620.7793576   | 2      | 0.000564   | 0.454     | 482   | 491  |
| IP100304925                     | Heat shock 70 kDa protein 1A/1B                                               | TPPSYVAFTDTER            | 30.97              | 2.642         | 784.3378293   | 2      | -0.000393  | -0.251    | 37    | 49   |
| IP100014344                     | Isoform Long of Dual specificity tyrosine-phosphorylation-regulated kinase 1A | TYQYIQR                  | 27.96              | 2.587         | 575.7684323   | 2      | -0.000787  | -0.684    | 318   | 325  |
| IP100798302                     | cDNA FLJ59405, highly similar to Eukaryotic translation initiation factor 4B  | ARPAATDSFDDYPPR          | 91.31              | 1.97          | 563.2421871   | 3      | -0.00102   | -0.602    | 162   | 175  |
| IP100922484                     | cDNA FLJ79376, highly similar to Protein G10 homolog                          | QGVENLcLR                | 1000               | 2.121         | 697.676611    | 2      | 0.00114    | 0.819     | 95    | 104  |
| IP100397358                     | Ribosomal protein S27                                                         | LVQSPNlyFMDK             | 30.97              | 2.385         | 804.3632809   | 2      | 0.00061    | 0.38      | 88    | 100  |
| IP100643041                     | GTP-binding nuclear protein Ran                                               | NLQYDISAK                | 26.2               | 2.254         | 647.7900387   | 2      | 0.000126   | 0.0973    | 143   | 152  |
| IP100909378                     | cDNA FLJ59219, highly similar to Poly(A)-binding protein 1                    | IYATKPYVYLAQR            | 133.51             | 2.484         | 541.6390377   | 3      | -0.00216   | -1.13     | 325   | 338  |
| IP100023343                     | Isoform 1 of Disks large homolog 3                                            | RNEVDGQYHPVVSRR          | 196.12             | 4.282         | 672.6256099   | 3      | -0.000147  | -0.0728   | 664   | 679  |
| IP100023343                     | Isoform 1 of Disks large homolog 3                                            | DNEVDGQYHPVVSRR          | 89.22              | 2.784         | 620.5920406   | 3      | 0.000245   | 0.132     | 665   | 679  |
| IP100472724                     | Putative elongation factor 1-alpha-like 3                                     | STTTGHLlyK               | 168.16             | 2.392         | 600.7871091   | 3      | -0.000333  | -0.278    | 21    | 30   |
| IP100916818                     | Phosphoglycerate kinase                                                       | KELNYFAK                 | 1000               | 1.647         | 546.7601926   | 2      | -0.000566  | -0.518    | 102   | 109  |
| IP100021634                     | Kinesin light chain 2                                                         | AEEVEYYR                 | 30.97              | 2.21          | 651.2585446   | 2      | 0.000238   | 0.183     | 340   | 348  |
| IP100021634                     | Kinesin light chain 2                                                         | AEEVEYYR                 | 24.95              | 3.171         | 486.5417476   | 3      | -0.000534  | -0.366    | 340   | 349  |
| IP100784090                     | T-complex protein 1 subunit theta                                             | HFSGLEAAVYK              | 169.13             | 2.385         | 694.3065182   | 2      | 0.000485   | 0.349     | 21    | 31   |
| IP100008530                     | 60S acidic ribosomal protein P0                                               | IIQLDDYK                 | 1000               | 1.873         | 649.3262936   | 2      | -0.000643  | -0.0495   | 17    | 26   |
| IP100917575                     | cDNA FLJ51046, highly similar to 60 kDa heat shock protein, mitochondrial     | CEFDQAVLLSEKIK           | 133.51             | 2.048         | 603.9428707   | 3      | -0.00063   | -0.348    | 181   | 194  |
| IP101014975                     | Talin 1                                                                       | ALDYMLR                  | 52.4               | 2.29          | 562.7468259   | 2      | 0.0006     | 0.534     | 67    | 74   |
| IP100908791                     | Uncharacterized protein                                                       | QVVEASVEIK               | 50.64              | 1.795         | 672.8266598   | 2      | 0.000268   | 0.199     | 207   | 217  |
| IP100894287                     | cDNA FLJ56889, moderately similar to Vigilin                                  | MDYVEINIDHK              | 1000               | 2.018         | 486.2111507   | 3      | -0.000724  | -0.497    | 402   | 412  |
| IP100854834                     | echinoderm microtubule-associated protein-like 4 isoform b                    | DVITNQEYGIK              | 1000               | 1.853         | 750.8531491   | 2      | -0.000453  | -0.302    | 159   | 170  |
| IP100302302                     | Isoform 2 of Homeodomain-interacting protein kinase 1                         | AVcSTYLQSR               | 30.97              | 2.612         | 632.7736203   | 2      | -0.000276  | -0.218    | 347   | 356  |
| IP100219875                     | Isoform 2ABC of Catenin delta-1                                               | SLDNNySPNER              | 30.97              | 2.171         | 745.3016965   | 2      | -0.000459  | -0.308    | 845   | 856  |
| IP100290142                     | CTP synthase 1                                                                | KLYGDADLEER              | 100.67             | 2.697         | 776.3403928   | 2      | -0.000466  | -0.3      | 466   | 477  |
| IP100006482                     | Isoform Long of Sodium/potassium-transporting ATPase subunit alpha-1          | GIWVYTDGR                | 30.97              | 2.121         | 530.2478193   | 2      | -0.000313  | -0.295    | 256   | 264  |
| IP100003479                     | Mitogen-activated protein kinase 1                                            | VADPDHDTGFLYVATR         | 51.21, 69.51       | 3.028         | 768.6510616   | 3      | -0.000223  | -0.0969   | 173   | 191  |
| IP10060715                      | BTB/POZ domain-containing protein KCTD12                                      | EAEYFELPELVR             | 1000               | 2.047         | 787.8614499   | 2      | 0.000648   | 0.412     | 116   | 127  |
| IP100166845                     | Isoform 3 of Tyrosine-protein kinase Fyn                                      | LIEDNEYAR                | 23.19              | 1.792         | 652.823483    | 2      | -0.000355  | -0.272    | 359   | 368  |
| IP100221141                     | Isoform CSBP1 of Mitogen-activated protein kinase 14                          | HTDDEMTGYVATR            | 63.52              | 2.866         | 525.8767696   | 3      | -0.000568  | -0.36     | 174   | 186  |
| IP100644618                     | Isoform 4 of Myelin protein zero-like protein 1                               | SESVVYADIR               | 112.12             | 2.345         | 609.7745358   | 2      | 0.00052    | 0.427     | 134   | 143  |
| IP100022353                     | Non-receptor tyrosine-protein kinase TYK2                                     | LLAQAGEGPEYIR            | 1000               | 2.226         | 800.3660886   | 2      | -0.000397  | -0.0248   | 282   | 294  |
| IP100298347                     | Isoform 2 of Tyrosine-protein phosphatase non-receptor type 11                | IQNTGQYDLGGGEK           | 30.97              | 2.61          | 908.3780514   | 2      | 0.000151   | 0.0833    | 56    | 70   |
| IP100302075                     | Heat shock protein 75 kDa, mitochondrial                                      | NlyTLCAPNR               | 67.96              | 2.018         | 682.2977292   | 2      | 0.000642   | 0.477     | 496   | 505  |
| IP100012795                     | Eukaryotic translation initiation factor 3 subunit I                          | SYSSGGEDGVR              | 108.98             | 1.977         | 678.759155    | 2      | -0.000442  | -0.326    | 299   | 310  |
| IP100163608                     | Isoform 5 of Partitioning defective 3 homolog                                 | ERDyAEIQDFHR             | 1000               | 3.145         | 553.5707393   | 3      | 0.0000414  | 0.025     | 965   | 976  |
| IP100976263                     | Protein                                                                       | LcDFGSASHVADNDITPhyLVSRR | 26.2               | 2.727         | 1259.061279   | 2      | 0.00244    | 0.97      | 336   | 357  |
| IP100718985                     | Isoform 2 of Glucocorticoid receptor DNA-binding factor 1                     | NEENlySVPHDSYQSK         | 60.18              | 2.726         | 676.2850948   | 3      | 0.00000781 | 0.00385   | 1099  | 1115 |
| IP100000874                     | Peroxiredoxin-1                                                               | SKEYFSK                  | 86.89              | 1.945         | 484.7104794   | 2      | 0.000107   | 0.111     | 191   | 197  |
| IP100975721                     | Uncharacterized protein                                                       | RDYEDVGRDyHFVTSR         | 81.55              | 2.829         | 524.481689    | 4      | -0.000246  | -0.117    | 738   | 753  |
| IP100975721                     | Uncharacterized protein                                                       | DyHFVTSR                 | 160.79             | 2.134         | 552.7295529   | 2      | -0.000246  | -0.222    | 746   | 753  |
| IP100975721                     | Uncharacterized protein                                                       | DYEDVGRDyHFVTSR          | 65.46              | 2.757         | 646.9395748   | 3      | 0.000648   | 0.334     | 739   | 753  |
| IP100418240                     | nebulin isoform 2                                                             | KPYCNHlyPK               | 85.89              | 2.68          | 453.1967464   | 3      | -0.00119   | -1.4      | 50    | 59   |
| IP100176637                     | Eukaryotic translation initiation factor 2 subunit 2-like protein             | LyFLQcETGSR              | 108.62             | 2.157         | 565.2341915   | 3      | 0.000672   | 0.0397    | 291   | 302  |
| IP100023974                     | Pituitary tumor-transforming gene 1 protein-interacting protein               | YGLFKEENlyAR             | 184.59             | 1.864         | 522.905212    | 3      | 0.000559   | 0.357     | 165   | 176  |
| IP100023974                     | Pituitary tumor-transforming gene 1 protein-interacting protein               | KYGLFKEENlyAR            | 72.19              | 1.962         | 565.6034542   | 3      | 0.000286   | 0.169     | 164   | 176  |
| IP100009522                     | Isoform 1 of Homeodomain-interacting protein kinase 3                         | TvCYTYLQSR               | 30.97              | 1.919         | 643.7790524   | 2      | -0.00012   | -0.0028   | 254   | 263  |
| IP10074                         |                                                                               |                          |                    |               |               |        |            |           |       |      |

|             |                                                                            |                 |       |       |             |   |            |         |      |      |
|-------------|----------------------------------------------------------------------------|-----------------|-------|-------|-------------|---|------------|---------|------|------|
| IP100956025 | HCG1996054, isoform CRA_d                                                  | AyDHLFK         | 1000  | 2.268 | 487.2133176 | 2 | 0.000284   | 0.291   | 4    | 10   |
| IP100429190 | cDNA FLJ161136, highly similar to Ras-related protein Rab-11A              | DDVEYDLFK       | 60.18 | 1.957 | 644.2451779 | 2 | 0.000104   | 0.081   | 50   | 58   |
| IP100908623 | cDNA FLJ54203, highly similar to Aspartate aminotransferase, mitochondrial | NLDKEYLPGGLAEFK | 1000  | 2.884 | 682.992065  | 3 | -0.000947  | -0.463  | 91   | 107  |
| IP100009342 | Ras GTPase-activating-like protein IQGAP1                                  | LQQTAYALNSK     | 30.97 | 2.092 | 658.8164059 | 2 | -0.00024   | -0.182  | 1506 | 1516 |
| IP100410067 | Isoform 1 of Zinc finger CCHC-type antiviral protein 1                     | KTGLLSSDYR      | 50.19 | 1.666 | 638.8004758 | 2 | -0.0009    | -0.705  | 401  | 411  |
| IP100827631 | Fliotillin 1                                                               | VSAQYLSEIMAK    | 46.67 | 1.774 | 774.8549802 | 2 | 0.00008076 | 0.00566 | 136  | 148  |
| IP100296157 | Isoform 1 of All-trans-retinol 13,14-reductase                             | GSDYETFK        | 27.96 | 1.72  | 513.695068  | 2 | 0.0000845  | 0.0824  | 483  | 490  |

**K65DE-FGFR3-Myr(+)-shN2**

|             |                                                                                           |                     |                    |       |             |   |             |          |      |      |
|-------------|-------------------------------------------------------------------------------------------|---------------------|--------------------|-------|-------------|---|-------------|----------|------|------|
| IP100955014 | cyclin-dependent kinase 1 isoform 1                                                       | IGEGTYGVVYK         | 30.97              | 3.566 | 633.2946164 | 2 | -0.000619   | -0.489   | 10   | 20   |
| IP100955014 | cyclin-dependent kinase 1 isoform 1                                                       | IGEGTYGVVYK         | 100.67, 75.44      | 1.946 | 673.2785641 | 2 | 0.000945    | 0.702    | 10   | 20   |
| IP100955014 | cyclin-dependent kinase 1 isoform 1                                                       | IEKIGEGYGVVYK       | 122.05, 98.40      | 2.594 | 858.3887936 | 2 | -0.000296   | -0.172   | 7    | 20   |
| IP100955014 | cyclin-dependent kinase 1 isoform 1                                                       | IEKIGEGYGVVYK       | 0                  | 2.095 | 818.4057614 | 2 | -0.000287   | -0.0176  | 7    | 20   |
| IP100955014 | cyclin-dependent kinase 1 isoform 1                                                       | IGEGTYGVVYKGR       | 109.69             | 2.957 | 493.5732112 | 3 | -0.000643   | -0.435   | 10   | 22   |
| IP100013174 | Isoform 1 of RNA-binding protein 14                                                       | LAELSDYR            | 60.18              | 1.628 | 523.7318112 | 2 | -0.000229   | -0.219   | 608  | 615  |
| IP100013174 | Isoform 1 of RNA-binding protein 14                                                       | SSLDYR              | 112.12             | 1.661 | 410.6657407 | 2 | -0.00057    | -0.695   | 631  | 636  |
| IP100013174 | Isoform 1 of RNA-binding protein 14                                                       | LAELSDYRR           | 54.52              | 2.208 | 401.5238033 | 3 | -0.00137    | -1.14    | 608  | 616  |
| IP100152906 | Histone H2B type 1-D                                                                      | ESYSVYVYK           | 60.18              | 1.828 | 609.2605588 | 2 | 0.000266    | 0.218    | 36   | 44   |
| IP100152906 | Histone H2B type 1-D                                                                      | KEYSVYVYK           | 74.96              | 2.939 | 673.3081662 | 2 | 0.000481    | 0.357    | 35   | 44   |
| IP100941201 | Isoform 1 of Peptidyl-prolyl cis-trans isomerase NMA-interacting 4                        | FGYHIMVEGR          | 1,000.00, 1,000.00 | 2.232 | 473.2163082 | 3 | -0.000767   | -0.541   | 120  | 130  |
| IP100941201 | Isoform 1 of Peptidyl-prolyl cis-trans isomerase NMA-interacting 4                        | FGYHIMVEGR          | 1000               | 2.322 | 467.8848262 | 3 | -0.000298   | -0.213   | 120  | 130  |
| IP100000000 | FGFR3 Mutant                                                                              | DVHNLDYK            | 27.96              | 2.863 | 614.1767879 | 3 | 0.00008072  | 0.0699   | 641  | 649  |
| IP100000000 | FGFR3 Mutant                                                                              | DVHNLDYKETTNGRLPKV  | 21.44              | 2.95  | 586.2853999 | 4 | -0.000302   | -0.129   | 641  | 659  |
| IP100000000 | FGFR3 Mutant                                                                              | DVHNLDYKETTNGR      | 39.33              | 2.073 | 476.9602046 | 4 | -0.000783   | -0.411   | 641  | 655  |
| IP100010740 | Isoform Long of Splicing factor, proline- and glutamine-rich                              | FAQHGTFFEYSGR       | 105.44             | 3.817 | 614.9215694 | 3 | 0.000232    | 0.126    | 480  | 493  |
| IP100012074 | Isoform 1 of Heterogeneous nuclear ribonucleoprotein R                                    | STAYEDYVYHPPRR      | 41.11              | 3.636 | 613.5856929 | 3 | -0.0013     | -0.706   | 428  | 441  |
| IP100216190 | Isoform 2 of Glycogen synthase kinase-3 beta                                              | GEPNVSYLcSR         | 30.97              | 2.611 | 681.2811307 | 2 | -0.0013     | -0.951   | 210  | 220  |
| IP100939558 | cDNA FLJ38696 fs, clone KIDNE2001931, highly similar to HETEROGENEOUS NUDVYLSPR           | GEVYVLSR            | 77.86              | 1.522 | 465.2101437 | 2 | -0.000964   | -1.04    | 191  | 197  |
| IP100515061 | Histone H2B type 1-J                                                                      | KEYSVYVYK           | 54.16              | 2.626 | 680.3156735 | 2 | -0.000205   | -0.15    | 35   | 44   |
| IP100515061 | Histone H2B type 1-J                                                                      | ESYSVYVYK           | 60.18              | 2.176 | 616.2686154 | 2 | 0.000679    | 0.552    | 36   | 44   |
| IP100909232 | cDNA FLJ35342, highly similar to Heterogeneous nuclear ribonucleoproteins C               | MYSYPAR             | 58.42              | 1.659 | 484.191528  | 2 | 0.000404    | 0.418    | 123  | 129  |
| IP100797148 | Isoform 2 of Heterogeneous nuclear ribonucleoprotein A1                                   | SSGPGYGGGGYFAKPR    | 189.14             | 4.111 | 570.2545162 | 3 | -0.000728   | -0.426   | 232  | 247  |
| IP100301503 | Isoform 1 of Transformer-2 protein homolog beta                                           | RPHPTFGYMGAPTYGSSR  | 0                  | 2.313 | 578.5258174 | 4 | -0.00113    | -0.49    | 198  | 217  |
| IP100844578 | ATP-dependent RNA helicase A                                                              | GAANKDYsR           | 0                  | 1.154 | 633.7799679 | 2 | 0.000843    | 0.0666   | 142  | 151  |
| IP100604620 | Nucleolin                                                                                 | SISLYTGEK           | 30.97              | 1.758 | 620.7795407 | 2 | 0.00093     | 0.75     | 458  | 467  |
| IP100171903 | Isoform 1 of Heterogeneous nuclear ribonucleoprotein M                                    | GGNRFPYANPTKR       | 103.45             | 1.998 | 562.9296871 | 3 | -0.00202    | -1.19    | 57   | 70   |
| IP100215884 | Isoform ASF-1 of Serine/arginine-rich splicing factor 1                                   | SHEGETAyIR          | 89.54              | 2.266 | 614.8434749 | 3 | -0.000852   | -0.686   | 182  | 191  |
| IP100456887 | Heterogeneous nuclear ribonucleoprotein L-like protein 2                                  | NYGYQGYR            | 61.94              | 1.807 | 632.2457272 | 2 | 0.000103    | 0.0814   | 739  | 747  |
| IP100220717 | Isoform 3 of Putative RNA-binding protein 15                                              | ERDYPFYR            | 117.08             | 2.09  | 452.1873775 | 3 | -0.000444   | -0.328   | 330  | 338  |
| IP100012998 | Isoform 1 of Cleavage and polyadenylation specificity factor subunit 6                    | DRHDYR              | 54.16              | 2.696 | 407.1559749 | 3 | -0.00115    | -0.945   | 515  | 522  |
| IP100012998 | Isoform 1 of Cleavage and polyadenylation specificity factor subunit 6                    | GAAPNVYVYTGKRR      | 27.96              | 2.728 | 526.255859  | 3 | -0.0006     | -0.38    | 67   | 80   |
| IP100011913 | Heterogeneous nuclear ribonucleoprotein A0                                                | GGFYVQFHDAADK       | 1000               | 2.323 | 599.2543941 | 3 | -0.000694   | -0.387   | 140  | 154  |
| IP100916600 | Uncharacterized protein                                                                   | VFDKDGNGYISAEELR    | 110.19             | 4.01  | 612.2843013 | 3 | -0.000573   | -0.312   | 139  | 154  |
| IP100418471 | Vimentin                                                                                  | SLYASSPGGVYATR      | 0                  | 2.226 | 754.8429562 | 2 | -0.000539   | -0.357   | 51   | 64   |
| IP101015591 | cDNA FLJ55635, highly similar to pre-mRNA-splicing factorATP-dependent RNA hHRDLGDEDYPSGK | YQYVYK              | 86.37              | 4.538 | 522.903442  | 3 | -0.000951   | -0.607   | 5    | 17   |
| IP100006025 | Isoform 1 of Squamous cell carcinoma antigen recognized by T-cells 3                      | GyCVVEFK            | 111.84             | 1.227 | 573.2230221 | 2 | 0.000327    | 0.286    | 747  | 754  |
| IP100006025 | Isoform 1 of Squamous cell carcinoma antigen recognized by T-cells 3                      | GyCVVEKKEK          | 105.44             | 2.683 | 511.2113033 | 3 | 0.000168    | 0.11     | 747  | 757  |
| IP100218435 | Isoform 2 of U4/U6 small nuclear ribonucleoprotein Prp4                                   | KPHYVLSLEK          | 50.64              | 2.644 | 515.245483  | 3 | 0.000872    | 0.565    | 267  | 377  |
| IP100784295 | Isoform 1 of Heat shock protein HSP 90-alpha                                              | HlyYITGETK          | 53.98              | 2.081 | 652.8003537 | 2 | -0.000442   | -0.0339  | 490  | 499  |
| IP101013815 | cDNA FLJ54736, highly similar to Scaffold attachment factor B                             | DDAYWPEAK           | 1000               | 2.037 | 587.7265011 | 2 | -0.000749   | -0.638   | 469  | 477  |
| IP100782992 | Isoform 1 of Serine/arginine repetitive matrix protein 2                                  | VRLSAVER            | 27.96              | 1.669 | 507.371213  | 2 | 0.000291    | 0.287    | 2385 | 2392 |
| IP100304925 | Heat shock 70 kDa protein 1A/1B                                                           | TPPSVYAFDTDR        | 30.97              | 2.16  | 784.3377682 | 2 | -0.000515   | -0.329   | 37   | 49   |
| IP100014344 | Isoform Long of Dual specificity tyrosine-phosphorylation-regulated kinase 1A             | TYQYQSR             | 60.16              | 2.306 | 575.7687985 | 2 | -0.000545   | -0.0474  | 318  | 325  |
| IP100798302 | cDNA FLJ59405, highly similar to Eukaryotic translation initiation factor 4B              | ARPAATSDFDYPPR      | 65.46              | 2.139 | 563.2425533 | 3 | 0.000833    | 0.0494   | 162  | 175  |
| IP100922484 | cDNA, FLJ79376, highly similar to Protein G10 homolog                                     | QYENLcLR            | 1000               | 2.788 | 696.7759396 | 2 | -0.000203   | -0.146   | 95   | 100  |
| IP100922484 | cDNA, FLJ79376, highly similar to Protein G10 homolog                                     | KQGYENLcLR          | 1000               | 2.47  | 507.5516964 | 3 | 0.000182    | 0.12     | 94   | 104  |
| IP100290204 | Isoform 1 of U1 small nuclear ribonucleoprotein 70 kDa                                    | GyAFIEYHER          | 209.41             | 2.713 | 498.5415035 | 3 | -0.000913   | -0.915   | 145  | 155  |
| IP100183500 | Isoform 1 of Nuclear cap-binding protein subunit 2                                        | SDSYVELSQYR         | 55.92              | 2.602 | 713.7986447 | 2 | 0.000338    | 0.237    | 11   | 21   |
| IP100477686 | General transcription factor IIF subunit 2                                                | AECRPAASENMYR       | 69.51              | 2.755 | 545.535884  | 3 | -0.000477   | -0.292   | 114  | 126  |
| IP100477686 | General transcription factor IIF subunit 2                                                | HQVYLNK             | 53.98              | 2.118 | 523.2290036 | 2 | -0.000644   | -0.616   | 194  | 200  |
| IP100397358 | Ribosomal protein S27                                                                     | LVQSPNlyPMDVY       | 27.96              | 3.164 | 804.3628537 | 2 | -0.000244   | -0.152   | 88   | 100  |
| IP100979518 | Uncharacterized protein                                                                   | HELQANcyEEVKDR      | 1000               | 2.897 | 624.2644649 | 3 | -0.00185    | -0.987   | 133  | 146  |
| IP100908996 | Uncharacterized protein                                                                   | DLNlyfSGDMSHR       | 96.95              | 1.888 | 561.2097774 | 3 | -0.00041    | -0.244   | 263  | 275  |
| IP100643041 | GTP-binding nuclear protein Ran                                                           | NLYQYISAK           | 26.2               | 2.133 | 647.7902829 | 2 | 0.000614    | 0.474    | 143  | 152  |
| IP100909378 | cDNA FLJ59219, highly similar to Poly(A)-binding protein 1                                | IVATKPLyVALAQR      | 72.36              | 1.73  | 541.6390987 | 3 | -0.00198    | -1.22    | 325  | 338  |
| IP100023343 | Isoform 1 of Disks large homolog 3                                                        | RNEVDVQGYHPVVSRR    | 183.63             | 4.688 | 672.625671  | 3 | 0.0000363   | 0.018    | 664  | 679  |
| IP100023343 | Isoform 1 of Disks large homolog 3                                                        | DNEVDVQGYHPVVSRR    | 80.05              | 3.175 | 620.5916744 | 3 | -0.000853   | -0.459   | 665  | 679  |
| IP100472724 | Putative elongation factor 1-alpha-like 3                                                 | STTTGHLlyK          | 157.94             | 2.764 | 600.787048  | 2 | -0.000455   | -0.379   | 21   | 30   |
| IP100220918 | Isoform 2 of DNA (cytosine-5)-methyltransferase 1                                         | KYSDYIK             | 50.64              | 1.431 | 498.7258603 | 2 | -0.000531   | -0.533   | 991  | 997  |
| IP100021634 | Kinesin light chain 2                                                                     | AEEVEYVYR           | 0                  | 3.013 | 486.5414425 | 3 | -0.00145    | -0.994   | 340  | 349  |
| IP100021634 | Kinesin light chain 2                                                                     | AEEVEYVYR           | 30.97              | 2.072 | 651.2584836 | 2 | 0.000116    | 0.0888   | 340  | 348  |
| IP100453473 | Histone H4                                                                                | ISGLlyEETR          | 46.67              | 2.504 | 630.7982175 | 2 | 0.000783    | 0.621    | 47   | 56   |
| IP100784090 | T-complex protein 1 subunit theta                                                         | HFSGLEEAyVR         | 48.38              | 1.524 | 694.3062741 | 2 | -0.00003035 | -0.00241 | 21   | 31   |
| IP100015838 | Cell growth-regulating nuclear protein                                                    | VLAQYTYTDEHHR       | 54.16              | 3.623 | 604.6090694 | 3 | -0.000268   | -0.148   | 336  | 349  |
| IP100183626 | polypyrimidine tract-binding protein 1 isoform a                                          | GQPIyIQFSNHK        | 65.3               | 1.802 | 504.5735469 | 3 | 0.0000643   | 0.0425   | 123  | 134  |
| IP100008530 | 60S acidic ribosomal protein P0                                                           | IIQLDDyPK           | 1000               | 2.191 | 649.3267819 | 2 | 0.000912    | 0.703    | 17   | 26   |
| IP100420014 | Isoform 1 of US small nuclear ribonucleoprotein 200 kDa helicase                          | MTQNPNlyNLQGISHR    | 27.96              | 1.865 | 672.6312252 | 2 | -0.0019     | -0.943   | 1764 | 1779 |
| IP100219420 | Structural maintenance of chromosomes protein 3                                           | GALTYGyDTR          | 27.96              | 2.224 | 627.264404  | 2 | 0.000456    | 0.364    | 662  | 672  |
| IP100220740 | Isoform 2 of Nucleophosmin                                                                | ADKDyHKVDNENEHQLSLR | 258.02             | 4.02  | 654.0476069 | 4 | -0.00167    | -0.631   | 25   | 45   |
| IP100797230 | 32 kDa protein                                                                            | ASGHyATVISHNPETK    | 24.95              | 2.854 | 590.2687374 | 3 | -0.000164   | -0.093   | 129  | 144  |
| IP100007941 | Protein HEXIM1                                                                            | HWKPyK              | 0                  | 1.35  | 551.2496945 | 2 | -0.000763   | -0.692   | 163  | 169  |
| IP101014975 | Talin 1                                                                                   | ALDYMYLR            | 51.06              | 2.362 | 562.7468259 | 2 | 0.0006      | 0.534    | 67   | 74   |
| IP100908791 | Uncharacterized protein                                                                   | QVVSAYEVIK          | 24.95              | 1.338 | 672.8273923 | 2 | 0.00173     | 1.29     | 207  | 217  |
| IP100894287 | cDNA FLJ56889, moderately similar to Vigilin                                              | MDVVEINDHK          | 1000               | 2.441 | 486.2111202 | 3 | -0.000816   | -0.56    | 402  | 412  |
| IP100854834 | echinoderm microtubule-associated protein-like 4 isoform b                                | DVINTEGEyIK         | 1000               | 2.096 | 750.8539426 | 2 | 0.00113     | 0.755    | 159  | 170  |
| IP100302302 | Isoform 2 of Homeodomain-interacting protein kinase 1                                     | AVcSTyLQSR          | 30.97              | 2.488 | 632.7736813 | 2 | -0.000154   | -0.122   | 347  | 356  |
| IP100219875 | Isoform 2ABC of Catenin delta-1                                                           | HYEDYGGSDNlyGSLSR   | 39.54              | 2.736 | 685.2693477 | 3 | -0.000633   | -0.308   | 162  | 179  |
| IP100219875 | Isoform 2ABC of Catenin delta-1                                                           | SLDNNySPNKR         | 30.97              | 1.713 | 745.3016965 | 2 | -0.000459   | -0.308   | 845  | 856  |
| IP100219875 | Isoform 2ABC of Catenin delta-1                                                           |                     |                    |       |             |   |             |          |      |      |

|             |                                                                           |                       |        |       |             |   |            |         |      |      |
|-------------|---------------------------------------------------------------------------|-----------------------|--------|-------|-------------|---|------------|---------|------|------|
| IP100166845 | Isoform 3 of Tyrosine-protein kinase Fyn                                  | GAYSLR                | 58.42  | 1.918 | 473.7240292 | 2 | 0.000307   | 0.324   | 183  | 190  |
| IP100166845 | Isoform 3 of Tyrosine-protein kinase Fyn                                  | KLDNGGYITTR           | 60.18  | 1.998 | 494.2330013 | 3 | -0.000573  | -0.387  | 207  | 218  |
| IP100221141 | Isoform CSBP1 of Mitogen-activated protein kinase 14                      | HTDDMTGVVATR          | 20.98  | 3.005 | 788.311279  | 2 | -0.000494  | -0.313  | 174  | 186  |
| IP100644618 | Isoform 4 of Myelin protein zero-like protein 1                           | SESVVYADIR            | 112.12 | 2.442 | 609.7744748 | 2 | 0.000398   | 0.327   | 134  | 143  |
| IP100022353 | Non-receptor tyrosine-protein kinase TYK2                                 | LLAQAEQEPYR           | 1000   | 2.578 | 800.3657223 | 2 | -0.000772  | -0.483  | 282  | 294  |
| IP100300060 | WD repeat-containing protein 70                                           | AAEDSPWVSPAYSK        | 60.18  | 2.131 | 875.8729855 | 2 | 0.00162    | 0.925   | 612  | 626  |
| IP100464978 | Insulin receptor substrate 2 insertion mutant (Fragment)                  | SDDYMPMSPVASPK        | 45.93  | 1.71  | 881.8580319 | 2 | 0.00121    | 0.688   | 674  | 689  |
| IP100985363 | Conserved hypothetical protein                                            | IVVLYTK               | 123.88 | 2.098 | 490.2491147 | 2 | -0.000222  | -0.227  | 30   | 36   |
| IP100298347 | Isoform 2 of Tyrosine-protein phosphatase non-receptor type 11            | IQNTGDYDLYGGEK        | 30.97  | 2.654 | 908.3780514 | 2 | 0.000151   | 0.0833  | 56   | 70   |
| IP100025089 | Splicing factor 3B subunit 1                                              | IYNDKNTYR             | 24.95  | 2.545 | 498.8927608 | 3 | -0.000494  | -0.331  | 1287 | 1297 |
| IP100012795 | Eukaryotic translation initiation factor 3 subunit 1                      | SYSSGGEGVYR           | 117.08 | 2.532 | 678.7596432 | 2 | 0.000535   | 0.394   | 299  | 310  |
| IP100011676 | Neural Wiskott-Aldrich syndrome protein                                   | VYDFIEK               | 1000   | 1.746 | 553.762634  | 2 | -0.000184  | -0.166  | 254  | 261  |
| IP100554788 | Keratin, type 1 cytoskeletal 18                                           | STFSTNYR              | 60.18  | 1.969 | 538.2138058 | 2 | -0.000399  | -0.0378 | 7    | 14   |
| IP100163608 | Isoform 5 of Partitioning defective 3 homolog                             | ERDYAEIQPFR           | 1000   | 3.303 | 553.5708004 | 3 | 0.000225   | 0.135   | 965  | 976  |
| IP100997623 | Protein                                                                   | LCDFGSASHVADNDITPYLVS | 55.24  | 6.084 | 839.7092281 | 3 | -0.000258  | -0.102  | 336  | 357  |
| IP100718985 | Isoform 2 of Glucocorticoid receptor DNA-binding factor 1                 | NEENIYGVPHDSTQK       | 27.96  | 2.422 | 676.2850948 | 3 | 0.00000781 | 0.00385 | 1099 | 1115 |
| IP100377011 | ubiquitin-conjugating enzyme E2 E1 isoform 2                              | GDNIYEW               | 1000   | 1.843 | 566.7272336 | 2 | 0.000116   | 0.102   | 56   | 63   |
| IP100140420 | Staphylococcal nuclease domain-containing protein 1                       | IWRDVIYVAPTALNDQK     | 128.78 | 2.427 | 623.9686275 | 3 | 0.00000595 | 0.00318 | 325  | 339  |
| IP100022521 | Isoform 2 of Dual specificity tyrosine-phosphorylation-regulated kinase 2 | VVYIQSR               | 30.97  | 1.651 | 555.255676  | 2 | 0.0003     | 0.271   | 306  | 313  |
| IP100975721 | Uncharacterized protein                                                   | DYEVGDRDHFVTSR        | 91.31  | 2.966 | 646.9390255 | 3 | -0.001     | -0.516  | 739  | 753  |
| IP100975721 | Uncharacterized protein                                                   | RDYEVGDRDHFVTSR       | 115.9  | 3.768 | 524.4818111 | 4 | 0.000243   | 0.116   | 738  | 753  |
| IP100023974 | Pituitary tumor-transforming gene 1 protein-interacting protein           | YGLFKEENPYR           | 187.3  | 1.978 | 783.8528439 | 2 | -0.000156  | -0.998  | 165  | 176  |
| IP100023974 | Pituitary tumor-transforming gene 1 protein-interacting protein           | KYGLFKEENPYR          | 277.04 | 3.121 | 565.6032711 | 3 | -0.000263  | -0.155  | 164  | 176  |
| IP100099522 | Isoform 1 of Homeodomain-interacting protein kinase 3                     | TVcSTYLQSR            | 30.97  | 1.797 | 647.7792966 | 2 | 0.000476   | 0.368   | 354  | 363  |
| IP100011609 | Isoform II of Ubiquitin-protein ligase E3A                                | DVTYITEK              | 30.97  | 1.911 | 589.2553097 | 2 | -0.000332  | -0.282  | 124  | 132  |
| IP100479469 | Myeloid/lymphoid or mixed-lineage leukemia                                | EYTFPASK              | 74.96  | 1.684 | 585.2503659 | 2 | 0.00088    | 0.753   | 1229 | 1237 |
| IP100022143 | Isoform 1 of Extended synaptotagmin-1                                     | HLSPTVTLVGDSSHK       | 24.95  | 3.029 | 598.2807613 | 3 | -0.000593  | -0.331  | 818  | 833  |
| IP100910417 | Ribosomal protein L15                                                     | QGVYVIR               | 79.9   | 1.57  | 489.7266232 | 2 | 0.000395   | 0.404   | 57   | 63   |
| IP100174976 | Isoform 1 of MAGUK p55 subfamily member 5                                 | DQEVAGRDYHFVSR        | 41.18  | 2.375 | 586.9249263 | 3 | -0.000998  | -0.567  | 520  | 533  |
| IP100032003 | Emerin                                                                    | DSAYQSTHYRPSASR       | 53.49  | 1.733 | 673.309753  | 3 | 0.000382   | 0.19    | 158  | 174  |
| IP100218697 | Isoform 2 of Protein 4.1                                                  | ERLDGENYR             | 1000   | 2.567 | 486.5643306 | 3 | -0.00178   | -1.22   | 619  | 629  |
| IP100956025 | HCC1996054, isoform CRA_d                                                 | AYDHLF                | 1000   | 1.86  | 487.2130734 | 2 | -0.000205  | -0.21   | 4    | 10   |
| IP100015973 | Band 4.1-like protein 2                                                   | VEGDNYR               | 1000   | 2.15  | 572.7560422 | 2 | 0.000233   | 0.203   | 617  | 625  |
| IP100784414 | Isoform 1 of Signal transducer and activator of transcription 3           | YRPESQHEPADGSAAPLYK   | 37.67  | 2.009 | 861.3732906 | 3 | 0.00173    | 0.67    | 686  | 707  |
| IP100429190 | cDNA FLJ161136, highly similar to Ras-related protein Rab-11A             | DDYDYLFK              | 54.16  | 2.232 | 644.245361  | 2 | 0.00047    | 0.365   | 50   | 58   |
| IP100009342 | Ras GTPase-activating-like protein IQGAP1                                 | LQTYAALNSK            | 30.97  | 1.836 | 658.8167721 | 2 | 0.000493   | 0.374   | 1506 | 1516 |
| IP100793886 | Tyrosine-protein kinase Sgk223                                            | EATQPEPIAESTKR        | 37.77  | 1.93  | 600.6123043 | 3 | -0.000564  | -0.313  | 403  | 417  |
| IP100790414 | 10 kDa protein                                                            | TYDYLFK               | 27.96  | 2.305 | 515.2208859 | 2 | 0.00042    | 0.408   | 4    | 10   |
| IP100397519 | Isoform 2 of Clathrin interactor 1                                        | NKDKYGVSSDYSVGGFR     | 130.6  | 2.567 | 632.2949825 | 2 | -0.000829  | -0.438  | 137  | 153  |
| IP100220325 | Isoform Short of Insulin receptor                                         | DIYETDYYR             | 0      | 1.767 | 659.2561642 | 2 | 0.000377   | 0.286   | 1171 | 1179 |

#### KESOE-FGFR3-Myr(-)-hCON

|             |                                                                                |                      |                    |       |             |   |           |        |     |     |
|-------------|--------------------------------------------------------------------------------|----------------------|--------------------|-------|-------------|---|-----------|--------|-----|-----|
| IP100955014 | cyclin-dependent kinase 1 isoform 1                                            | IEKIGEGYGVYK         | 87.07, 74.47       | 2.578 | 572.5946651 | 3 | -0.00171  | -0.998 | 7   | 20  |
| IP100955014 | cyclin-dependent kinase 1 isoform 1                                            | IGEGTYGVYK           | 30.97              | 2.132 | 633.2943722 | 2 | -0.00111  | -0.875 | 10  | 20  |
| IP100955014 | cyclin-dependent kinase 1 isoform 1                                            | IGEGTYGVYK           | 120.71, 102.46     | 2.927 | 673.2746655 | 2 | -0.00125  | -0.93  | 10  | 20  |
| IP100955014 | cyclin-dependent kinase 1 isoform 1                                            | IEKIGEGYGVYK         | 27.96              | 2.387 | 545.9326966 | 3 | -0.00157  | -0.958 | 7   | 20  |
| IP100013174 | Isoform 1 of RNA-binding protein 14                                            | YSGYNDYLR            | 88.93              | 2.288 | 659.261047  | 2 | -0.000957 | -0.727 | 648 | 657 |
| IP100013174 | Isoform 1 of RNA-binding protein 14                                            | LAELSDYRR            | 50.64              | 1.932 | 601.7815549 | 2 | -0.00184  | -1.53  | 608 | 616 |
| IP100013174 | Isoform 1 of RNA-binding protein 14                                            | RLAELSDYRR           | 53.49              | 1.604 | 453.5576473 | 3 | -0.000935 | -0.688 | 607 | 616 |
| IP100013174 | Isoform 1 of RNA-binding protein 14                                            | LAELSDYR             | 60.18              | 2.088 | 523.731384  | 2 | -0.00108  | -1.04  | 608 | 615 |
| IP100013174 | Isoform 1 of RNA-binding protein 14                                            | SLDLYR               | 112.12             | 1.811 | 410.665527  | 2 | -0.000997 | -1.22  | 631 | 636 |
| IP100013174 | Isoform 1 of RNA-binding protein 14                                            | RLPDMSDYAR           | 41.47              | 3.318 | 460.8735958 | 3 | -0.00109  | -0.789 | 637 | 647 |
| IP100152906 | Histone H2B type 1-D                                                           | KESYSVYK             | 23.2               | 1.778 | 673.3076169 | 2 | -0.000618 | -0.459 | 35  | 44  |
| IP100152906 | Histone H2B type 1-D                                                           | ESYSVYK              | 60.18              | 2.623 | 609.2597653 | 2 | -0.00132  | -1.08  | 36  | 44  |
| IP100941201 | Isoform 1 of Peptidyl-prolyl cis-trans isomerase NIMA-interacting 4            | FgyHIMVEGR           | 1000               | 3.986 | 467.8845516 | 3 | -0.00112  | -0.8   | 120 | 130 |
| IP100941201 | Isoform 1 of Peptidyl-prolyl cis-trans isomerase NIMA-interacting 4            | FgyHIMVEGR           | 1,000.00, 1,000.00 | 1.814 | 473.2160335 | 3 | -0.00159  | -1.12  | 120 | 130 |
| IP100941201 | Isoform 1 of Peptidyl-prolyl cis-trans isomerase NIMA-interacting 4            | TKFGYHIMVEGR         | 80.55              | 2.926 | 544.2656856 | 3 | -0.00042  | -0.257 | 118 | 130 |
| IP100000000 | FGFR3 Mutant                                                                   | DVHNLDYKETTNGR       | 70.57              | 4.177 | 635.6107784 | 3 | -0.00144  | -0.757 | 641 | 655 |
| IP100000000 | FGFR3 Mutant                                                                   | DVHNLDYK             | 58.42              | 3.272 | 623.7604367 | 2 | -0.00158  | -1.27  | 641 | 649 |
| IP100000000 | FGFR3 Mutant                                                                   | DVHNLDYKETTNGR       | 79.9               | 1.709 | 681.2999264 | 2 | -0.000644 | -0.341 | 593 | 603 |
| IP100000000 | FGFR3 Mutant                                                                   | DVHNLDYKETTNGR       | 91.31, 69.51       | 2.474 | 662.266296  | 3 | -0.00122  | -0.615 | 641 | 655 |
| IP100000000 | FGFR3 Mutant                                                                   | DVHNLDYKETTNGRLPVK   | 106.06, 91.77      | 2.465 | 606.2765498 | 4 | -0.00203  | -0.84  | 641 | 659 |
| IP100000000 | FGFR3 Mutant                                                                   | DVHNLDYKETTNGRLPVK   | 26.2               | 6.961 | 586.2852778 | 4 | -0.00079  | -0.337 | 641 | 659 |
| IP100010740 | Isoform Long of Splicing factor, proline- and glutamine-rich                   | FAHQHTFEYEQSR        | 117.47             | 4.05  | 614.9215694 | 3 | 0.000232  | 0.126  | 480 | 499 |
| IP100010740 | Isoform Long of Splicing factor, proline- and glutamine-rich                   | QHPPHYQHQQHPPGPPGGPR | 100.00             | 2.03  | 621.5307612 | 4 | -0.00276  | -1.11  | 246 | 267 |
| IP100010740 | Isoform Long of Splicing factor, proline- and glutamine-rich                   | DKLESEMEDVYHEKHNLLR  | 149.03             | 3.514 | 627.7769771 | 4 | -0.00239  | -0.954 | 517 | 536 |
| IP100012074 | Isoform 1 of Heterogeneous nuclear ribonucleoprotein R                         | STAYEDYYPHPPR        | 0                  | 3.796 | 613.5855098 | 3 | -0.00185  | -1     | 428 | 441 |
| IP100012074 | Isoform 1 of Heterogeneous nuclear ribonucleoprotein R                         | LKDYAFVHEDR          | 1000               | 2.905 | 540.5801387 | 2 | -0.00126  | -0.778 | 373 | 384 |
| IP100216190 | Isoform 1 of Glycogen synthase kinase-3 beta                                   | GEVNVYLSR            | 30.97              | 2.172 | 681.2808224 | 2 | -0.00227  | -1.67  | 210 | 220 |
| IP100939558 | cDNA FLJ38696 fs, clone KIDNE2001931, highly similar to HETEROGENEOUS NUDYVLSR |                      | 86.89              | 1.622 | 465.2101132 | 2 | -0.00103  | -1.1   | 191 | 197 |
| IP100939558 | cDNA FLJ38696 fs, clone KIDNE2001931, highly similar to HETEROGENEOUS NUDYVLSR |                      | 61.94              | 1.751 | 629.2246091 | 2 | -0.00103  | -0.822 | 270 | 279 |
| IP100939558 | cDNA FLJ38696 fs, clone KIDNE2001931, highly similar to HETEROGENEOUS NUDYVLSR |                      | 30.97              | 1.811 | 536.6847531 | 2 | -0.000745 | -0.695 | 297 | 304 |
| IP100939558 | cDNA FLJ38696 fs, clone KIDNE2001931, highly similar to HETEROGENEOUS NUDYVLSR |                      | 16.25              | 2.015 | 500.5316463 | 2 | -0.00104  | -0.692 | 205 | 216 |
| IP100939558 | cDNA FLJ38696 fs, clone KIDNE2001931, highly similar to HETEROGENEOUS NUDYVLSR |                      | 30.97              | 1.573 | 482.6926877 | 2 | -0.000176 | -0.183 | 319 | 326 |
| IP100515061 | Histone H2B type 1-J                                                           | KESYSVYK             | 53.49              | 2.333 | 453.8790889 | 3 | -0.00211  | -1.55  | 35  | 44  |
| IP100515061 | Histone H2B type 1-J                                                           | ESYSVYK              | 54.16              | 2.061 | 616.2683102 | 2 | 0.0000689 | 0.056  | 36  | 44  |
| IP100909232 | cDNA FLJ53542, highly similar to Heterogeneous nuclear ribonucleoprotein C     | MySYPAR              | 58.42              | 2.191 | 484.1911313 | 2 | -0.000389 | -0.402 | 123 | 129 |
| IP100797148 | Isoform 2 of Heterogeneous nuclear ribonucleoprotein A1                        | SSGPGYGGGQYFAKPR     | 216.75             | 4.758 | 570.2543331 | 3 | -0.00128  | -0.748 | 232 | 247 |
| IP100797148 | Isoform 2 of Heterogeneous nuclear ribonucleoprotein A1                        | NQGGYGGSSSSSYGSGR    | 105.08             | 3.259 | 887.8366696 | 2 | -0.00141  | -0.796 | 248 | 265 |
| IP100301503 | Isoform 1 of Transformer-2 protein homolog beta                                | RHPPTPGIVMPTFYGSSR   | 20.2               | 3.599 | 578.5252681 | 4 | -0.00333  | -1.44  | 198 | 217 |
| IP100301503 | Isoform 1 of Transformer-2 protein homolog beta                                | AAQDRDQYR            | 1000               | 1.35  | 658.2932126 | 2 | -0.00113  | -0.856 | 252 | 261 |
| IP100301503 | Isoform 1 of Transformer-2 protein homolog beta                                | GYDRDYYSR            | 55.92              | 2.172 | 695.2588498 | 2 | -0.00145  | -1.04  | 229 | 238 |
| IP100844578 | ATP-dependent RNA helicase A                                                   | GANLKDYSR            | 20.98              | 2.018 | 422.8549495 | 3 | -0.00283  | -2.23  | 142 | 151 |
| IP100844578 | ATP-dependent RNA helicase A                                                   | DFVNYLVR             | 1000               | 1.793 | 553.2581174 | 2 | 0.0000832 | 0.0752 | 64  | 71  |
| IP100844578 | ATP-dependent RNA helicase A                                                   | NFLYAWGK             | 1000               | 1.942 | 619.7572629 | 2 | -0.000291 | -0.235 | 6   | 14  |
| IP100604620 | Nucleolin                                                                      | NLPYKVTQDELK         | 64.24              | 1.508 | 509.9200435 | 3 | -0.00175  | -1.14  | 399 | 410 |
| IP100604620 | Nucleolin                                                                      | SISLYTTEGKQNDYR      | 27.96              | 1.983 | 701.3121944 | 3 | -0.00239  | -1.14  | 458 | 474 |
| IP100604620 | Nucleolin                                                                      | SISLYTTEGK           | 30.97              | 1.577 | 620.7785641 | 2 | -0.00102  | -0.825 | 458 | 467 |
| IP100604620 | Nucleolin                                                                      | GLAYIEFK             | 100                |       |             |   |           |        |     |     |

|             |                                                                                          |                     |                 |             |             |          |           |         |        |      |
|-------------|------------------------------------------------------------------------------------------|---------------------|-----------------|-------------|-------------|----------|-----------|---------|--------|------|
| IP100479217 | Isoform Short of Heterogeneous nuclear ribonucleoprotein U                               | EDHGRGFYEIENKYSR    | 27.19           | 3.719       | 593.7551265 | 4        | -0.0015   | -0.631  | 232    | 249  |
| IP100479217 | Isoform Short of Heterogeneous nuclear ribonucleoprotein U                               | GFFEYIENKYSR        | 132.33          | 3.505       | 593.25415   | 3        | -0.00627  | -0.353  | 237    | 249  |
| IP100479217 | Isoform Short of Heterogeneous nuclear ribonucleoprotein U                               | GFFEYIENK           | 123.22          | 1.715       | 686.2794186 | 2        | -0.000143 | -0.0104 | 237    | 246  |
| IP100479217 | Isoform Short of Heterogeneous nuclear ribonucleoprotein U                               | EDHGRGFYEIENK       | 91.01           | 2.404       | 655.938293  | 3        | -0.0029   | -1.47   | 232    | 246  |
| IP100456887 | Heterogeneous nuclear ribonucleoprotein U-like protein 2                                 | YRDYR               | 58.42           | 1.975       | 508.205383  | 2        | -0.000886 | -0.872  | 711    | 716  |
| IP100456887 | Heterogeneous nuclear ribonucleoprotein U-like protein 2                                 | NYGYQGYR            | 58.42           | 2.307       | 632.2457883 | 2        | 0.000225  | 0.178   | 739    | 747  |
| IP100456887 | Heterogeneous nuclear ribonucleoprotein U-like protein 2                                 | FYGRDYENR           | 24.95           | 1.797       | 488.1976314 | 3        | -0.00198  | -1.36   | 701    | 710  |
| IP100456887 | Heterogeneous nuclear ribonucleoprotein U-like protein 2                                 | AYEYER              | 67.96           | 1.622       | 464.6838681 | 2        | -0.000615 | -0.663  | 213    | 218  |
| IP100220717 | Isoform 3 of Putative RNA-binding protein 15                                             | ERDYPFYER           | 50.19           | 1.998       | 677.7768552 | 2        | -0.00104  | -0.769  | 330    | 338  |
| IP100220717 | Isoform 3 of Putative RNA-binding protein 15                                             | IEAVVSR             | 43.29           | 2.07        | 508.7445981 | 2        | -0.000355 | -0.35   | 247    | 254  |
| IP100017297 | Matrin-3                                                                                 | TGFvK               | 105.08          | 1.698       | 428.1591183 | 2        | -0.00088  | -1.03   | 799    | 804  |
| IP100017297 | Matrin-3                                                                                 | NTHCSSLPHYQK        | 148.41          | 3.501       | 517.8854976 | 3        | -0.000749 | -0.483  | 818    | 829  |
| IP100012998 | Isoform 1 of Cleavage and polyadenylation specificity factor subunit 6                   | GAAPNVVYTYTGKR      | 27.96           | 3.16        | 526.2556758 | 3        | -0.00115  | -0.729  | 67     | 80   |
| IP100012998 | Isoform 1 of Cleavage and polyadenylation specificity factor subunit 6                   | DRHDDYR             | 81.61           | 4.057       | 407.1557003 | 3        | -0.00198  | -1.62   | 515    | 522  |
| IP100013891 | Isoform Long of Transformer-2 protein homolog alpha                                      | GVDREYDYR           | 35.84           | 1.841       | 532.1998287 | 3        | -0.00139  | -0.872  | 245    | 255  |
| IP100012340 | Serine/arginine-rich splicing factor 9                                                   | SHEGETSYR           | 0               | 1.995       | 629.7587887 | 2        | -0.000774 | -0.615  | 172    | 181  |
| IP100012340 | Serine/arginine-rich splicing factor 9                                                   | GSPHYSPFRPY         | 74.69           | 1.911       | 512.2221675 | 3        | -0.00117  | -0.765  | 210    | 221  |
| IP100438229 | Isoform 1 of Transcription intermediary factor 1-beta                                    | KLIYFQLHR           | 1000            | 3.354       | 433.2323909 | 3        | -0.000804 | -0.619  | 366    | 374  |
| IP100438229 | Isoform 1 of Transcription intermediary factor 1-beta                                    | DcQLNAHKDHYQFLEDAVR | 1000            | 3.183       | 642.5341182 | 4        | -0.00109  | -0.426  | 231    | 250  |
| IP100438229 | Isoform 1 of Transcription intermediary factor 1-beta                                    | LlyFQLHR            | 1000            | 2.195       | 585.2972409 | 2        | -0.00067  | -0.573  | 367    | 374  |
| IP100032830 | Isoform 1 of Oligoribonuclease, mitochondrial (Fragment)                                 | RWYPEEYFAPK         | 142.88          | 3.864       | 565.5799556 | 3        | -0.00141  | -0.832  | 178    | 189  |
| IP100032830 | Isoform 1 of Oligoribonuclease, mitochondrial (Fragment)                                 | WYPEEYFAPK          | 104.74          | 1.948       | 769.8158566 | 2        | -0.000638 | -0.415  | 179    | 189  |
| IP100032830 | Isoform 1 of Oligoribonuclease, mitochondrial (Fragment)                                 | WYPEEYFAPK          | 85.93           | 2.095       | 556.2443233 | 3        | -0.00221  | -1.32   | 179    | 190  |
| IP100032830 | Isoform 1 of Oligoribonuclease, mitochondrial (Fragment)                                 | RWYPEEYFAPK         | 81.38           | 2.592       | 608.2781368 | 3        | -0.00187  | -1.02   | 178    | 190  |
| IP100011913 | Heterogeneous nuclear ribonucleoprotein A0                                               | GFGFVYQNHDAADK      | 1000            | 3.238       | 599.2530513 | 3        | -0.00472  | -2.63   | 140    | 154  |
| IP100011913 | Heterogeneous nuclear ribonucleoprotein A0                                               | EDYSGGGGGSR         | 30.97           | 2.622       | 646.2513425 | 2        | -0.000967 | -0.748  | 177    | 189  |
| IP100916600 | Uncharacterized protein                                                                  | VFDKDGNGYISAAELR    | 107.96          | 3.826       | 917.9220578 | 2        | -0.00154  | -0.837  | 139    | 154  |
| IP100910458 | Heterogeneous nuclear ribonucleoprotein K                                                | DyDDMSR             | 122.33          | 1.769       | 539.681091  | 2        | -0.00107  | -0.992  | 255    | 262  |
| IP100910458 | Heterogeneous nuclear ribonucleoprotein K                                                | GGDLMAYDR           | 1000            | 1.468       | 617.2576901 | 2        | -0.00137  | -1.11   | 293    | 302  |
| IP100418471 | Vimentin                                                                                 | FANVLDKVR           | 1000            | 2.733       | 402.5286556 | 3        | -0.00171  | -1.42   | 114    | 122  |
| IP100418471 | Vimentin                                                                                 | SLYASSPGGVYATR      | 57.17           | 3.981       | 754.8424069 | 2        | -0.00164  | -1.09   | 51     | 64   |
| IP100418471 | Vimentin                                                                                 | SVSSSSYR            | 27.96           | 1.932       | 476.6920163 | 2        | -0.00132  | -1.38   | 5      | 12   |
| IP100418471 | Vimentin                                                                                 | HLREYQQLNIVK        | 1000            | 2.063       | 536.6020504 | 3        | -0.00433  | -2.69   | 379    | 390  |
| IP100418471 | Vimentin                                                                                 | TYSLGSLRPSYTSR      | 29.21           | 2.51        | 525.9224849 | 3        | -0.00142  | -0.902  | 37     | 50   |
| IP100418471 | Vimentin                                                                                 | SVSSSSYR            | 21.95           | 1.985       | 554.7426755 | 2        | -0.0011   | -0.993  | 5      | 13   |
| IP101015591 | cDNA FLJ55635, highly similar to pre-mRNA-splicing factorATP-dependent RNA hHRDLGDEYPSGK | 86.37               | 3.936           | 522.9030147 | 3           | -0.00223 | -1.42     | 5       | 17     |      |
| IP101015591 | cDNA FLJ55635, highly similar to pre-mRNA-splicing factorATP-dependent RNA hHRDLGDEYPSGK | 27.96               | 2.046           | 637.2709347 | 2           | -0.00158 | -1.24     | 7       | 17     |      |
| IP100031812 | Nuclease-sensitive element-binding protein 1                                             | NGYGFNR             | 1000            | 2.108       | 510.7185055 | 2        | -0.00124  | -1.22   | 70     | 77   |
| IP100031812 | Nuclease-sensitive element-binding protein 1                                             | RNFNR               | 1000            | 1.484       | 475.205797  | 2        | -0.000692 | -0.729  | 283    | 288  |
| IP100006025 | Isoform 1 of Squamous cell carcinoma antigen recognized by T-cells 3                     | GyCVFEKEK           | 137.37          | 3.051       | 511.210815  | 3        | -0.00173  | -0.847  | 747    | 757  |
| IP100006025 | Isoform 1 of Squamous cell carcinoma antigen recognized by T-cells 3                     | GyCVFEK             | 116.83          | 2.288       | 573.222778  | 2        | -0.000161 | -0.14   | 747    | 754  |
| IP100418313 | Interleukin enhancer-binding factor 3 isoform d                                          | NADHSMNYQR          | 47.48           | 1.132       | 493.5223384 | 3        | -0.000961 | -0.65   | 888    | 898  |
| IP100376317 | Isoform 1 of Enhancer of mRNA-decapping protein 4                                        | SLAFHRFPYHLLQQK     | 137.45          | 3.621       | 486.5004573 | 4        | -0.00227  | -1.17   | 855    | 869  |
| IP100218435 | Isoform 2 of U4/U6 small nuclear ribonucleoprotein Prp4                                  | KPHlyQSLEEKER       | 39.33           | 2.964       | 457.9710994 | 4        | -0.0027   | -1.48   | 26     | 39   |
| IP100218435 | Isoform 2 of U4/U6 small nuclear ribonucleoprotein Prp4                                  | KPHlyQSLEEK         | 77.86           | 3.91        | 515.2451168 | 2        | -0.000226 | -0.147  | 26     | 37   |
| IP100414676 | Heat shock protein HSP 90-beta                                                           | EDQTEYLEER          | 60.18           | 2.217       | 696.2719113 | 2        | -0.000929 | -0.668  | 187    | 196  |
| IP100414676 | Heat shock protein HSP 90-beta                                                           | DNSTMGYMMAK         | 56.2            | 1.288       | 664.740112  | 2        | -0.000328 | -0.247  | 613    | 623  |
| IP100784295 | Isoform 1 of Heat shock protein HSP 90-alpha                                             | HlyYITGETK          | 51.06           | 4.481       | 652.7996823 | 2        | -0.00139  | -1.06   | 490    | 499  |
| IP100015924 | Isoform 1 of Tufelin-interacting protein 11                                              | EQKVYYSQYSIKH       | 0               | 2.781       | 613.9478756 | 3        | -0.00385  | -2.09   | 275    | 288  |
| IP100939523 | DEAD (Asp-Glu-Ala-Asp) box polypeptide 46, isoform CRA_a                                 | LNYVPLEKQEEER       | 1000            | 2.62        | 576.2734371 | 3        | -0.000765 | -0.443  | 909    | 921  |
| IP100939523 | DEAD (Asp-Glu-Ala-Asp) box polypeptide 46, isoform CRA_a                                 | ACNKGAYHTTDEDQR     | 43.97           | 3.792       | 662.2983394 | 3        | -0.00135  | -0.684  | 713    | 729  |
| IP100939523 | DEAD (Asp-Glu-Ala-Asp) box polypeptide 46, isoform CRA_a                                 | LNYVPLEK            | 1000            | 1.427       | 528.2622678 | 2        | -0.00122  | -1.15   | 909    | 916  |
| IP101013815 | cDNA FLJ54736, highly similar to Scaffold attachment factor 8                            | cyGVTMSTAEATK       | 195.43          | 2.647       | 887.8574826 | 2        | 0.000148  | 0.0836  | 198    | 212  |
| IP101013815 | cDNA FLJ54736, highly similar to Scaffold attachment factor 8                            | DDAYWFEAK           | 1000            | 2.458       | 587.726196  | 2        | -0.00126  | -1.16   | 469    | 477  |
| IP100013830 | SNW domain-containing protein 1                                                          | LAPAQYR             | 1000            | 1.746       | 506.2549433 | 2        | -0.000864 | -0.855  | 171    | 178  |
| IP100013830 | SNW domain-containing protein 1                                                          | LAEALYIADRK         | 1000            | 1.808       | 671.8413693 | 2        | -0.00241  | -1.8    | 287    | 297  |
| IP100013830 | SNW domain-containing protein 1                                                          | AADKLAPQYR          | 1000            | 2.376       | 466.2374263 | 3        | -0.0025   | -1.79   | 167    | 178  |
| IP100782992 | Isoform 1 of Serine/arginine repetitive matrix protein 2                                 | VPLSAYER            | 60.18           | 2.007       | 507.7367551 | 2        | -0.000441 | -0.435  | 2385   | 2392 |
| IP100304925 | Heat shock 70 kDa protein 1A/1B                                                          | TTPSYVAFDTER        | 49.9            | 3.424       | 784.3365475 | 2        | -0.00296  | -1.89   | 37     | 49   |
| IP100304925 | Heat shock 70 kDa protein 1A/1B                                                          | MVQEAEKYKAEDVQR     | 1000            | 2.437       | 678.3065181 | 3        | -0.00132  | -0.65   | 518    | 533  |
| IP100014344 | Isoform Long of Dual specificity tyrosine-phosphorylation-regulated kinase 1A            | TYQYQSR             | 65.61           | 1.698       | 575.767822  | 2        | -0.00201  | -1.74   | 318    | 325  |
| IP100014344 | Isoform Long of Dual specificity tyrosine-phosphorylation-regulated kinase 1A            | KVYNDGYDDNYDYIVK    | 24.95           | 2.225       | 726.9672847 | 3        | -0.00492  | -2.26   | 134    | 150  |
| IP100644386 | Uncharacterized protein                                                                  | AWEETYYK            | 27.96           | 1.867       | 598.7550046 | 2        | -0.000742 | -0.62   | 585    | 592  |
| IP100798302 | cDNA FLJ59405, highly similar to Eukaryotic translation initiation factor 4B             | ARPATDSFDDYPPR      | 195.26          | 3.419       | 563.2419429 | 3        | -0.00175  | -1.04   | 162    | 175  |
| IP100889791 | cDNA FLJ13224, clone KIDNE2004305, highly similar to ATP-dependent DNA HELVPPDYMPGK      | 84.46               | 1.721           | 800.8499142 | 2           | -0.00182 | -1.14     | 486     | 498    |      |
| IP100922484 | cDNA, FLJ79376, highly similar to Protein G10 homolog                                    | QGYENLCLR           | 1000            | 2.543       | 696.7753293 | 2        | -0.00142  | -1.02   | 95     | 104  |
| IP100922484 | cDNA, FLJ79376, highly similar to Protein G10 homolog                                    | KQGYENLCLR          | 1000            | 3.446       | 507.5513301 | 3        | -0.000917 | -0.603  | 94     | 104  |
| IP100955965 | Isoform 2 of Ubiquitin carboxyl-terminal hydrolase 10                                    | KRPPGYSYLK          | 23.2            | 3.527       | 484.5745235 | 3        | -0.00101  | -0.693  | 202    | 212  |
| IP100955965 | Isoform 2 of Ubiquitin carboxyl-terminal hydrolase 10                                    | RPPGYSYLK           | 1000            | 1.761       | 662.3105466 | 2        | -0.00058  | -0.497  | 203    | 212  |
| IP100955965 | Isoform 2 of Ubiquitin carboxyl-terminal hydrolase 10                                    | KRPPGYSYLK          | 0               | 2.685       | 527.2725216 | 3        | -0.00201  | -1.27   | 201    | 212  |
| IP100290204 | Isoform 1 of U1 small nuclear ribonucleoprotein 70 kDa                                   | GyAFIEYEH           | 320.95          | 3.863       | 498.5412288 | 3        | -0.00219  | -1.47   | 145    | 155  |
| IP100290204 | Isoform 1 of U1 small nuclear ribonucleoprotein 70 kDa                                   | HHNQPyGIAPYR        | 233.02          | 4.115       | 602.603149  | 3        | -0.000995 | -0.551  | 33     | 46   |
| IP100183500 | Isoform 1 of Nuclear cap-binding protein subunit 2                                       | SDSYVELSQYR         | 55.92           | 3.374       | 713.7982175 | 2        | -0.000517 | -0.362  | 11     | 21   |
| IP100477686 | General transcription factor IIF subunit 2                                               | HQYNLK              | 26.2            | 1.962       | 523.2290036 | 2        | -0.000644 | -0.616  | 194    | 200  |
| IP100477686 | General transcription factor IIF subunit 2                                               | AERPAASENMR         | 69.51           | 2.973       | 545.533443  | 3        | -0.00121  | -0.74   | 114    | 126  |
| IP100396378 | Isoform B1 of Heterogeneous nuclear ribonucleoproteins A2/B1                             | NyEYQWK             | 58.42           | 2.131       | 584.2286374 | 2        | -0.00178  | -1.52   | 39     | 46   |
| IP100397358 | Ribosomal protein S27                                                                    | LVQSPNSyFMDVK       | 27.96           | 3.079       | 804.3623044 | 2        | -0.00134  | -0.835  | 88     | 100  |
| IP100397358 | Ribosomal protein S27                                                                    | LVQSPNSyFMDVK       | 30.97, 1,000.00 | 3.161       | 812.3593136 | 2        | -0.00224  | -1.38   | 88     | 100  |
| IP100397358 | Ribosomal protein S27                                                                    | RLVQSPNSyFMDVK      | 27.96           | 3.505       | 588.6111446 | 3        | -0.00144  | -0.818  | 87     | 100  |
| IP100056880 | Zinc finger protein 787                                                                  | RAPAKPyVGLLECK      | 1000            | 2.365       | 609.2874141 | 2        | -0.00306  | -1.68   | 273    | 287  |
| IP100056880 | Zinc finger protein 787                                                                  | IHTGEKPYACLECGR     | 95.68           | 3.533       | 500.4790645 | 4        | -0.000574 | -0.287  | 115    | 130  |
| IP100056880 | Zinc finger protein 787                                                                  | IHTGEKPYACLECGR     | 102.1           | 2.871       | 614.9355465 | 3        | -0.00127  | -0.688  | 115    | 129  |
| IP100005978 | Serine/arginine-rich splicing factor 2                                                   | VGDVYIPR            | 1000            | 2.493       | 499.7391965 | 2        | -0.000759 | -0.76   | 40     | 47   |
| IP100784224 | Similar to Zinc finger RNA-binding protein                                               | HATYPTFEELQAVQK     | 24.95           | 3.806       | 646.3065792 | 3        | -0.00184  | -0.949  | 731    | 746  |
| IP100979518 | Uncharacterized protein                                                                  | HELQANQYEEVKDR      | 1000            | 3.479       | 624.264587  | 2        | -0.00148  | -0.792  | 133    | 146  |
| IP100979518 | Uncharacterized protein                                                                  | LTGIKHELQANQYEEVKDR | 181.76          | 4.133       | 596.5330195 | 4        | -0.00339  | -1.42   | 128    | 146  |
| IP100220381 | Isoform 2 of Transcription factor 20                                                     | QNLTDYPIPR          | 60.18           | 3.016       | 705.344299  | 2        | -0.00245  | -1.74   | 833    | 843  |
| IP100220381 | Isoform 2 of Transcription factor 20                                                     | SfyPYHVNVK          | 57.17           | 1.58        | 723.8444211 | 2        | -0.00121  | -0.836  | 1630</ |      |

|             |                                                                                     |                     |                 |       |             |   |           |         |      |      |
|-------------|-------------------------------------------------------------------------------------|---------------------|-----------------|-------|-------------|---|-----------|---------|------|------|
| IP100790636 | HLA-B associated transcript 1                                                       | GSVSIHSSGFR         | 48.15           | 2.826 | 459.5379634 | 3 | -0.00169  | -1.22   | 37   | 48   |
| IP100790636 | HLA-B associated transcript 1                                                       | LTHLGLQQYVVK        | 27.96           | 2.486 | 514.9290157 | 3 | -0.000929 | -0.602  | 257  | 268  |
| IP100395337 | Isoform 1 of Pre-mRNA 3'-end-processing factor FIP1                                 | QWQYIAR             | 30.97           | 1.608 | 541.2102658 | 2 | -0.00172  | -1.59   | 450  | 456  |
| IP100029081 | Isoform Alpha of DNA ligase 3                                                       | VNKLYPFDVFPDPK      | 30.97           | 1.971 | 944.4681393 | 2 | -0.00157  | -0.833  | 763  | 777  |
| IP100029081 | Isoform Alpha of DNA ligase 3                                                       | 1YYPDFVFPDPK        | 61.94           | 2.637 | 773.8654782 | 2 | -0.000595 | -0.385  | 766  | 777  |
| IP100029081 | Isoform Alpha of DNA ligase 3                                                       | VNKLYPFDVFPDPK      | 23.2            | 2.787 | 672.679565  | 3 | -0.00198  | -0.983  | 763  | 778  |
| IP100023343 | Isoform 1 of Disks large homolog 3                                                  | RNEVDGQDYPHFVSR     | 228.66          | 5.003 | 672.6252437 | 3 | -0.00125  | -0.618  | 664  | 679  |
| IP100472724 | Putative elongation factor 1-alpha-like 3                                           | STTTGHLIYK          | 153.88          | 2.708 | 600.7865597 | 2 | -0.00143  | -1.19   | 21   | 30   |
| IP100472724 | Putative elongation factor 1-alpha-like 3                                           | EHALLAYTLGVK        | 27.96           | 2.187 | 465.5740963 | 3 | -0.00199  | -1.43   | 135  | 146  |
| IP100916818 | Phosphoglycerate kinase                                                             | KELNYFAK            | 1000            | 2.627 | 546.7604977 | 2 | 0.0000439 | 0.0402  | 102  | 109  |
| IP100916818 | Phosphoglycerate kinase                                                             | ELNYFAK             | 1000            | 1.785 | 482.7124936 | 2 | -0.000964 | -1      | 103  | 109  |
| IP100220918 | Isoform 2 of DNA (cytosine-5)-methyltransferase 1                                   | KEPVEDLYPEHYR       | 75.44           | 2.525 | 623.9394527 | 3 | -0.00352  | -1.88   | 977  | 990  |
| IP100220918 | Isoform 2 of DNA (cytosine-5)-methyltransferase 1                                   | KYSYDIK             | 74.96           | 2.013 | 488.7254025 | 2 | -0.00145  | -1.45   | 991  | 997  |
| IP100220918 | Isoform 2 of DNA (cytosine-5)-methyltransferase 1                                   | YSDYIK              | 49.89           | 1.223 | 434.6782223 | 2 | -0.000807 | -0.929  | 992  | 997  |
| IP100021417 | U4/U6.U5 tri-snRNP-associated protein 1                                             | TPYIVLSGSGK         | 48.15           | 1.931 | 601.2972409 | 2 | -0.00047  | -0.391  | 781  | 791  |
| IP100021634 | Kinesin light chain 2                                                               | AEVEEYIYR           | 30.97           | 2.552 | 651.2578122 | 2 | -0.00123  | -0.943  | 340  | 348  |
| IP100021634 | Kinesin light chain 2                                                               | AEVEEYIYR           | 27.96           | 3.365 | 486.5412288 | 3 | -0.00209  | -1.43   | 340  | 349  |
| IP100453473 | Histone H4                                                                          | ISGLIYEETR          | 70.88           | 2.989 | 630.797485  | 2 | -0.000681 | -0.541  | 47   | 56   |
| IP100784090 | T-complex protein 1 subunit theta                                                   | HFSGLEEAIVR         | 198.92          | 2.327 | 694.3051755 | 2 | -0.0022   | -1.59   | 21   | 31   |
| IP100015838 | Cell growth-regulating nuclear protein                                              | VLAQYVTTDEHR        | 54.16           | 3.695 | 604.6084591 | 3 | -0.00121  | -1.16   | 336  | 349  |
| IP100028122 | Isoform 1 of FC4 and SFRS1-interacting protein                                      | MKGYPHWPAR          | 1000            | 3.128 | 441.5337825 | 3 | -0.00133  | -1      | 15   | 24   |
| IP100793920 | CDV3 homolog (Mouse), isoform CRA_a                                                 | LQLDQAVLENQK        | 1000            | 2.285 | 585.9489132 | 3 | -0.000937 | -0.534  | 238  | 251  |
| IP100183626 | polypyrimidine tract-binding protein 1 isoform a                                    | GQPYIQFSNHK         | 86.37           | 1.656 | 756.3555295 | 2 | -0.00169  | -1.12   | 123  | 134  |
| IP100008830 | 60S acidic ribosomal protein P0                                                     | ITQLDDYPK           | 1000            | 2.158 | 649.3259885 | 2 | -0.000675 | -0.52   | 17   | 26   |
| IP100018140 | Isoform 1 of Heterogeneous nuclear ribonucleoprotein Q                              | KLKDYAFHFDER        | 1000            | 2.343 | 441.2142329 | 4 | -0.00327  | -1.86   | 369  | 381  |
| IP100018140 | Isoform 1 of Heterogeneous nuclear ribonucleoprotein Q                              | LKDYAFHFDER         | 1000            | 1.997 | 545.2520748 | 3 | -0.00115  | -0.705  | 370  | 381  |
| IP100420014 | Isoform 1 of US small nuclear ribonucleoprotein 200 kDa helicase                    | MTQNPNYMLQGISHR     | 77.86           | 4.045 | 672.6307979 | 3 | -0.00318  | -1.58   | 1764 | 1779 |
| IP100219420 | Structural maintenance of chromosomes protein 3                                     | LHTEEEKEELAQYK      | 205.08          | 2.278 | 689.9928585 | 3 | -0.0013   | -0.629  | 200  | 215  |
| IP100219420 | Structural maintenance of chromosomes protein 3                                     | GALTTGGYDTR         | 26.2            | 2.711 | 672.2633664 | 2 | -0.00162  | -1.29   | 662  | 672  |
| IP100479209 | cDNA FLJ54590, highly similar to KH domain-containing, RNA-binding, signaltran      | GAYREHPYGRY         | 93.15           | 1.721 | 483.541534  | 3 | -0.00227  | -1.57   | 413  | 423  |
| IP100479209 | cDNA FLJ54590, highly similar to KH domain-containing, RNA-binding, signaltran      | KDDEENYLDLFSHK      | 196.79          | 2.594 | 611.59613   | 3 | -0.00189  | -1.03   | 119  | 132  |
| IP100210740 | Isoform 2 of Nucleophosmin                                                          | AKDKYFRKVDNDEHQLSLR | 323.42          | 6.173 | 664.0475459 | 4 | -0.00192  | -0.723  | 25   | 45   |
| IP100917575 | cDNA FLJ51046, highly similar to 60 kDa heat shock protein, mitochondrial           | CEFDQAYVLLSEK       | 133.51          | 2.311 | 603.9427486 | 3 | -0.000996 | -0.55   | 181  | 194  |
| IP100917575 | cDNA FLJ51046, highly similar to 60 kDa heat shock protein, mitochondrial           | CEFDQAYVLLSEK       | 75.44           | 2.07  | 841.3628537 | 2 | -0.000709 | -0.422  | 181  | 193  |
| IP100917575 | cDNA FLJ51046, highly similar to 60 kDa heat shock protein, mitochondrial           | GYISPYFINTSK        | 53.49           | 1.784 | 735.3396603 | 2 | -0.000331 | -0.225  | 166  | 177  |
| IP100797230 | 32 kDa protein                                                                      | ASGNAYATVSHNPETK    | 79.35           | 3.647 | 590.2678829 | 3 | -0.00273  | -1.54   | 129  | 144  |
| IP100007941 | Protein HEXIM1                                                                      | HWKPYK              | 48.87           | 2.331 | 551.2494504 | 2 | -0.00125  | -1.14   | 163  | 169  |
| IP101014975 | Talin 1                                                                             | ALDYMYLR            | 30.97           | 2.277 | 562.7464596 | 2 | -0.000132 | -0.118  | 67   | 74   |
| IP101014975 | Talin 1                                                                             | ALDYMYLR            | 24.95, 1,000.00 | 1.651 | 570.7433469 | 2 | -0.00127  | -1.12   | 67   | 74   |
| IP100908791 | Uncharacterized protein                                                             | QVVEAVEYIK          | 23.2            | 1.669 | 672.8261716 | 2 | -0.000708 | -0.527  | 207  | 217  |
| IP100908791 | Uncharacterized protein                                                             | DQLYMLK             | 1000            | 1.763 | 600.307922  | 2 | 0.0000926 | 0.0772  | 6    | 14   |
| IP100922360 | cDNA FLJ54488, highly similar to Eukaryotic translation initiation factor 3 subunit | IKNEGMYR            | 1000            | 2.194 | 489.1992795 | 2 | -0.000893 | -0.913  | 773  | 779  |
| IP100922360 | cDNA FLJ54488, highly similar to Eukaryotic translation initiation factor 3 subunit | IQGTGGYFR           | 63.6            | 1.963 | 564.7290036 | 2 | -0.00144  | -1.28   | 757  | 765  |
| IP100026215 | Flap endonuclease 1                                                                 | RLDPNKYPPVENLHK     | 1000            | 3.978 | 522.2617183 | 4 | -0.00433  | -2.07   | 262  | 277  |
| IP100894287 | cDNA FLJ56889, moderately similar to Vigilin                                        | MDYVEINIDHK         | 1000            | 2.658 | 728.8123166 | 2 | -0.00172  | -1.18   | 402  | 412  |
| IP100181728 | Ribosome biogenesis protein BRX1 homolog                                            | KQDLYMWSLNSPHGSAK   | 136.26          | 2.419 | 713.6615596 | 3 | -0.0046   | -2.15   | 123  | 140  |
| IP100181728 | Ribosome biogenesis protein BRX1 homolog                                            | KKQDLYMWSLNSPHGSAK  | 186.31          | 4.811 | 567.5224605 | 4 | -0.00226  | -0.997  | 122  | 140  |
| IP100854834 | echinoderm microtubule-associated protein-like 4 isoform b                          | DVINQGEYIK          | 1000            | 1.951 | 750.8530881 | 2 | -0.000575 | -0.383  | 159  | 170  |
| IP100854834 | echinoderm microtubule-associated protein-like 4 isoform b                          | HKDVINQGEYIK        | 1000            | 2.574 | 589.2880855 | 3 | -0.00442  | -2.39   | 157  | 170  |
| IP100019046 | Isoform 1 of Pre-mRNA-splicing factor RBM22                                         | TPYKYR              | 0               | 1.027 | 504.7311398 | 2 | -0.00117  | -1.16   | 153  | 159  |
| IP100019046 | Isoform 1 of Pre-mRNA-splicing factor RBM22                                         | SDWNKYTYQNWER       | 86.89           | 2.335 | 619.5889278 | 3 | -0.00149  | -0.804  | 110  | 123  |
| IP100303402 | Phosphorylated adapter RNA export protein                                           | QSETNYLLAK          | 60.18           | 2.443 | 705.3211056 | 2 | -0.00104  | -0.738  | 148  | 158  |
| IP100017617 | Probable ATP-dependent RNA helicase DDX5                                            | STCYGGAAPK          | 89.54           | 1.652 | 567.2385251 | 2 | -0.00117  | -1.03   | 518  | 527  |
| IP100017617 | Probable ATP-dependent RNA helicase DDX5                                            | GYSLLK              | 67.96           | 1.221 | 424.2015683 | 2 | -0.00141  | -1.67   | 197  | 203  |
| IP100307733 | Isoform 1 of Histone-Lysine N-methyltransferase SETD2                               | IYYHVITR            | 54.16           | 2.431 | 436.5455247 | 3 | -0.001    | -0.767  | 2405 | 2413 |
| IP100790342 | 60S ribosomal protein L6                                                            | SVFALTNIGYPHK       | 91.31           | 2.714 | 519.5856014 | 3 | 0.000228  | 0.149   | 274  | 286  |
| IP100031801 | Isoform 1 of DNA-binding protein A                                                  | RPYNYR              | 48.15           | 1.818 | 474.7078244 | 2 | -0.0014   | -1.48   | 331  | 336  |
| IP100186290 | Elongation factor 2                                                                 | EDLYLKPQR           | 1000            | 2.061 | 452.2304073 | 3 | -0.00185  | -1.37   | 440  | 449  |
| IP100186290 | Elongation factor 2                                                                 | KEDLYLKPQR          | 1000            | 2.474 | 494.9288631 | 3 | -0.00149  | -1      | 439  | 449  |
| IP100465248 | Isoform alpha-enolase of Alpha-enolase                                              | IGAEVYHLK           | 1000            | 1.009 | 408.5321346 | 3 | -0.00187  | -1.53   | 184  | 193  |
| IP100302302 | Isoform 2 of Homeodomain-interacting protein kinase 1                               | AVCTYLQSR           | 30.97           | 2.648 | 632.7732541 | 2 | -0.00101  | -0.798  | 347  | 356  |
| IP100294794 | RRP12-like protein isoform 2                                                        | GRPDFYAPLNR         | 113.53          | 2.072 | 537.9274288 | 3 | -0.00199  | -1.23   | 1185 | 1197 |
| IP100010204 | Serine/arginine-rich splicing factor 3                                              | AFGYPLR             | 61.94           | 1.717 | 562.252197  | 2 | -0.00126  | -1.12   | 29   | 37   |
| IP100925601 | Uncharacterized protein                                                             | VVAENLYPFVK         | 1000            | 2.418 | 695.3358151 | 2 | -0.000387 | -0.278  | 97   | 107  |
| IP100925601 | Uncharacterized protein                                                             | LAGDKANVWVLR        | 1000            | 2.264 | 524.9172969 | 2 | -0.000286 | -0.182  | 456  | 467  |
| IP100925601 | Uncharacterized protein                                                             | ANVWVLR             | 1000            | 1.788 | 544.7390744 | 2 | -0.0015   | -1.38   | 461  | 467  |
| IP100219875 | Isoform 2ABC of Catenin delta-1                                                     | SLDNNYSPNER         | 30.97           | 1.596 | 745.3005978 | 2 | -0.00266  | -1.78   | 845  | 856  |
| IP100219875 | Isoform 2ABC of Catenin delta-1                                                     | LNGPDHSHLLYSTPR     | 27.96           | 2.311 | 676.6625362 | 3 | 0.00133   | 0.657   | 31   | 47   |
| IP100216659 | Isoform 2 of RNA-binding protein BA                                                 | MREDYDSVEQDQEGPQR   | 21.95           | 3.054 | 768.3016353 | 3 | -0.00347  | -1.51   | 49   | 67   |
| IP100290142 | CTP synthase 1                                                                      | LYGDADYLEER         | 152.04          | 2.031 | 712.2926633 | 2 | -0.000925 | -0.65   | 467  | 477  |
| IP100290142 | CTP synthase 1                                                                      | KLYGDADYLEER        | 145.89          | 2.174 | 776.3395383 | 2 | -0.00218  | -1.4    | 466  | 477  |
| IP100550191 | Uncharacterized protein C9orf78                                                     | ATDDYHYEK           | 27.96           | 1.764 | 611.2265011 | 2 | -0.00145  | -1.19   | 273  | 281  |
| IP100977430 | cDNA, FLJ79286, highly similar to T-complex protein 1 subunit gamma                 | KIGDEYFTTIDCKDKPK   | 37.97           | 2.716 | 719.6585689 | 3 | -0.00194  | -0.897  | 309  | 325  |
| IP100783594 | Isoform 3 of RNA-binding protein with serine-rich domain 1                          | GyAYVEFNDEAEK       | 86.89           | 2.838 | 920.8696896 | 2 | -0.000372 | -0.202  | 167  | 181  |
| IP100221012 | Isoform 1 of Probable ubiquitin carboxyl-terminal hydrolase FAF-X                   | FNDYFEFPR           | 1000            | 2.589 | 657.7636716 | 2 | -0.000108 | -0.0825 | 1812 | 1820 |
| IP100006482 | Isoform Long of Sodium/potassium-transporting ATPase subunit alpha-1                | GLVYTGDR            | 30.97           | 1.997 | 530.2466428 | 2 | -0.00227  | -2.14   | 256  | 264  |
| IP100237671 | Neurofilament light polypeptide                                                     | SAYSSYSAVSSSLSVR    | 30.97           | 2.914 | 914.4113156 | 2 | -0.00152  | -0.832  | 38   | 54   |
| IP101011344 | 37 kDa protein                                                                      | DSYVGEAQSQR         | 77.86           | 2.662 | 478.8683773 | 3 | -0.000845 | -0.589  | 51   | 62   |
| IP101011344 | 37 kDa protein                                                                      | IWHHTFYNELR         | 79.35           | 3.163 | 532.5765377 | 3 | -0.00206  | -1.29   | 85   | 95   |
| IP100644488 | guanylate kinase isoform a                                                          | NPDPCEENKGYVYVTR    | 40.66           | 3.722 | 531.2402949 | 4 | -0.00192  | -0.906  | 63   | 79   |
| IP100923436 | Isoform 4 of Nuclear receptor corepressor 2                                         | SAVYFLYR            | 70.16           | 2.003 | 581.2890622 | 2 | -0.000627 | -0.54   | 2230 | 2238 |
| IP100923436 | Isoform 4 of Nuclear receptor corepressor 2                                         | NFYFLYK             | 124.16          | 1.669 | 538.2183224 | 2 | -0.000107 | -0.0992 | 651  | 657  |
| IP100418169 | Isoform 2 of Annexin A2                                                             | SlyTYIQDQTK         | 58.42           | 2.24  | 751.3344113 | 2 | -0.000729 | -0.485  | 332  | 342  |
| IP100418169 | Isoform 2 of Annexin A2                                                             | LSLEGDHTPPSAVGSVK   | 24.95           | 3.284 | 642.2943721 | 3 | -0.00206  | -1.07   | 29   | 46   |
| IP100003479 | Mitogen-activated protein kinase 1                                                  | VADPDHDTGFLIEYVATR  | 56.46, 69.51    | 2.366 | 768.6508175 | 3 | -0.000956 | -0.415  | 173  | 191  |
| IP100807491 | Isoform 2 of General transcription factor 3C polypeptide 1                          | GyYSPGVSTR          | 67.96           | 2.283 | 640.2893674 | 2 | -0.00152  | -1.19   | 1650 | 1660 |
| IP100021320 | 75K snRNA methylphosphate capping enzyme                                            | KFYGNVYK            | 79.9            | 1.515 | 644.2649533 | 2 | -0.00131  | -1.02   | 412  | 420  |
| IP100910664 | cDNA FLJ52148, highly similar to Apoptosis inhibitor 5                              | YSSLGNFNYER         | 113.07          | 1.904 | 772.3139645 | 2 | -0.00162  | -1.05   | 315  | 326  |
| IP100060715 | BTB/POZ domain-containing protein KCTD12                                            | EAEYFELFELVRR       |                 |       |             |   |           |         |      |      |

|             |                                                                                                    |                        |                 |       |               |   |            |         |      |      |
|-------------|----------------------------------------------------------------------------------------------------|------------------------|-----------------|-------|---------------|---|------------|---------|------|------|
| IP100166845 | Isoform 3 of Tyrosine-protein kinase Fyn                                                           | GAYSLISR               | 61.94           | 1.921 | 473.7235104   | 2 | -0.000731  | -0.772  | 183  | 190  |
| IP100221141 | Isoform CSBP1 of Mitogen-activated protein kinase 14                                               | HTDDEMTGVATR           | 64.24           | 3.021 | 525.8764034   | 3 | -0.00167   | -1.06   | 174  | 186  |
| IP101011934 | 117 kDa protein                                                                                    | KLYVQQLK               | 55.92           | 2.707 | 582.2967526   | 2 | -0.00105   | -0.899  | 776  | 783  |
| IP100413365 | Isoform 1 of Zinc finger protein 318                                                               | MYLIR                  | 61.94           | 1.681 | 413.1717831   | 2 | -0.00129   | -1.56   | 909  | 913  |
| IP100798211 | Uncharacterized protein                                                                            | LGEYEDVSR              | 117.47          | 2.572 | 574.236572    | 2 | -0.00201   | -1.75   | 95   | 103  |
| IP100644618 | Isoform 4 of Myelin protein zero-like protein 1                                                    | SESVVYADIR             | 112.12          | 2.352 | 609.7735593   | 2 | -0.00143   | -1.18   | 134  | 143  |
| IP100022353 | Non-receptor tyrosine-protein kinase TYK2                                                          | LLAQAEQPEYIR           | 1000            | 2.638 | 800.3656003   | 2 | -0.00102   | -0.635  | 282  | 294  |
| IP100015912 | Protein FAM50B                                                                                     | FSAHYDAVEAEK           | 50.19           | 2.411 | 780.3419797   | 2 | -0.00219   | -1.41   | 49   | 61   |
| IP100300060 | WD repeat-containing protein 70                                                                    | AAEDSPYVWSPAYSK        | 95.92           | 3.374 | 875.8716428   | 2 | -0.00107   | -0.609  | 612  | 626  |
| IP100297211 | SWI/SNF-related matrix-associated actin-dependent regulator of chromatin subfamily Q-like member 1 | NVALLSQLVHSPAR         | 47.48           | 2.839 | 550.2782589   | 3 | -0.0021    | -1.27   | 192  | 205  |
| IP100013917 | 40S ribosomal protein S12                                                                          | DVIEYFK                | 1000            | 1.658 | 561.7414548   | 2 | -0.00104   | -0.928  | 122  | 129  |
| IP100464978 | Insulin receptor substrate 2 insertion mutant (Fragment)                                           | SDDYMPMSFASVSPK        | 26.99           | 1.967 | 881.8573605   | 2 | -0.00013   | -0.074  | 674  | 689  |
| IP100464978 | Insulin receptor substrate 2 insertion mutant (Fragment)                                           | APYTGSDGSDQVLLMSSPVRG  | 77.91           | 2.707 | 780.6600948   | 3 | -0.00336   | -1.43   | 814  | 834  |
| IP100985363 | Conserved hypothetical protein                                                                     | IVYLYTK                | 81.61           | 1.77  | 490.2486874   | 2 | -0.00108   | -1.1    | 30   | 36   |
| IP100909544 | cDNA FLJ52848, highly similar to ATP-dependent RNA helicase DDX3X                                  | SDYDGGSR               | 111.84          | 2.47  | 525.2005002   | 2 | -0.00105   | -1      | 146  | 154  |
| IP100298347 | Isoform 2 of Tyrosine-protein phosphatase non-receptor type 11                                     | GHEVYTIK               | 51.06           | 1.628 | 521.2235715   | 2 | -0.00141   | -1.35   | 539  | 546  |
| IP100298347 | Isoform 2 of Tyrosine-protein phosphatase non-receptor type 11                                     | IQNTGDTYDLVGEKE        | 30.97           | 2.781 | 908.3773801   | 2 | -0.00119   | -0.656  | 56   | 70   |
| IP100026089 | Splicing factor 3B subunit 1                                                                       | IYNDKNTYIR             | 24.95           | 2.608 | 498.8924251   | 3 | -0.0015    | -1      | 1287 | 1297 |
| IP100032791 | Ribonuclease P protein subunit p29                                                                 | SVIYHALSK              | 74.63           | 2.011 | 613.3030392   | 2 | 0.0000269  | 0.022   | 3    | 12   |
| IP100216044 | Isoform 1 of RNA-binding protein Raly                                                              | VAGSVHKGAFVQVSNER      | 83.01           | 3.544 | 751.3367916   | 3 | -0.00117   | -0.518  | 48   | 66   |
| IP100025087 | Isoform 1 of Cellular tumor antigen p53                                                            | KKPLRDEYFLLQR          | 98.4            | 2.346 | 596.6419674   | 3 | 0.0000225  | 0.126   | 320  | 333  |
| IP10030275  | Heat shock protein 75 kDa, mitochondrial                                                           | NIYVLCAPNR             | 58.42           | 2.341 | 682.2968136   | 2 | -0.00119   | -0.872  | 496  | 505  |
| IP100221092 | 40S ribosomal protein S16                                                                          | GGGHVAQYAIR            | 1000            | 2.638 | 441.218658    | 3 | -0.0016    | -1.21   | 74   | 85   |
| IP100909921 | cDNA FLJ36146, highly similar to JmjC domain-containing histone demethylase YREB1                  | YREB1                  | 22.23           | 2.236 | 556.5868526   | 3 | -0.00222   | -1.33   | 539  | 550  |
| IP100910763 | Uncharacterized protein                                                                            | DYSGYQR                | 54.16           | 1.345 | 484.6797787   | 2 | 0.000206   | 0.213   | 340  | 346  |
| IP100003847 | Zinc finger protein 324A                                                                           | KPTGVSVIYWER           | 110.85          | 1.854 | 505.5853267   | 2 | -0.000596  | -0.394  | 135  | 146  |
| IP100166500 | E3 SUMO-protein ligase PIAS4                                                                       | TPLAGNIDYVPLVYK        | 84.46           | 2.293 | 899.4457394   | 2 | 0.000527   | 0.293   | 99   | 114  |
| IP100641788 | U1 small nuclear ribonucleoprotein C                                                               | FYDyCYLTHDPSFVR        | 51.52           | 2.806 | 793.6411739   | 3 | -0.00219   | -0.919  | 25   | 42   |
| IP100102661 | TPX2, microtubule-associated, homolog (Xenopus laevis), isoform CRA_a                              | NQEYKVEVNTSLR          | 93.62           | 2.116 | 655.9577022   | 3 | -0.00207   | -1.05   | 274  | 288  |
| IP100456758 | 60S ribosomal protein L27a                                                                         | INFDKHPGVYK            | 91.31           | 3.025 | 555.9203487   | 3 | -0.00143   | -0.859  | 43   | 55   |
| IP101014521 | cDNA FLJ56994, highly similar to Zinc finger protein 460                                           | HQWHTCEKPYVdCQK        | 53.69           | 4.046 | 581.0142207   | 4 | -0.00295   | -1.27   | 397  | 414  |
| IP100893431 | cDNA FLJ53410, highly similar to Eukaryotic translation initiation factor 3 subunit10GyLVK         | IF3S10GyLVK            | 1000            | 2.118 | 524.71228     | 2 | -0.000857  | -0.817  | 446  | 453  |
| IP101010755 | cDNA FLJ57326, highly similar to ATP-dependent RNA helicase DDX1                                   | EKWVYHVCSSR            | 104.99          | 2.51  | 510.8904415   | 3 | -0.000717  | -0.469  | 496  | 506  |
| IP101010755 | cDNA FLJ57326, highly similar to ATP-dependent RNA helicase DDX1                                   | VWVHVCSSR              | 153.29          | 1.867 | 637.2631222   | 2 | -0.000372  | -0.292  | 498  | 506  |
| IP100168859 | myc-associated zinc finger protein isoform 2                                                       | GFTTAAVLR              | 74.63           | 1.709 | 540.2499386   | 2 | -0.000674  | -0.625  | 427  | 435  |
| IP100012795 | Eukaryotic translation initiation factor 3 subunit 1                                               | SYSSGGEDGVR            | 145.62          | 2.849 | 678.584225    | 2 | -0.00191   | -1.41   | 299  | 310  |
| IP100011676 | Neural Wiskott-Aldrich syndrome protein                                                            | VlyDFIEK               | 1000            | 2.188 | 553.7622678   | 2 | -0.000916  | -0.828  | 254  | 261  |
| IP100399170 | Isoform 2 of Regulator of nonsense transcripts 1                                                   | JAYFTLTK               | 48.15           | 1.664 | 516.7623898   | 2 | -0.000272  | -0.263  | 342  | 349  |
| IP100893918 | Valyl-tRNA synthetase                                                                              | GDRIVHQLK              | 1000            | 2.142 | 403.8641353   | 3 | -0.00157   | -1.3    | 424  | 432  |
| IP100893918 | Valyl-tRNA synthetase                                                                              | IYHQLK                 | 1000            | 1.86  | 441.2179257   | 2 | -0.0007    | -0.794  | 427  | 432  |
| IP100893918 | Valyl-tRNA synthetase                                                                              | LHEEGDlyR              | 1000            | 1.936 | 605.2868649   | 2 | -0.00112   | -0.927  | 462  | 470  |
| IP100853433 | Uncharacterized protein                                                                            | IMEYEEK                | 30.97           | 1.338 | 528.2114865   | 2 | -0.000979  | -0.927  | 54   | 60   |
| IP100000728 | Isoform 1 of Ubiquitin carboxyl-terminal hydrolase 15                                              | NSNYLPSYATK            | 60.18           | 2.311 | 830.8395383   | 2 | -0.00054   | -0.325  | 260  | 272  |
| IP100945276 | Uncharacterized protein                                                                            | HNHYFMYR               | 58.42           | 2.132 | 685.2900387   | 2 | -0.000974  | -0.492  | 89   | 97   |
| IP100013654 | Isoform 2 of Dynactin subunit 3                                                                    | YLDPEYIDR              | 162.6           | 1.713 | 632.2685544   | 2 | -0.000743  | -0.588  | 67   | 75   |
| IP100642944 | Poly(A) binding protein, cytoplasmic 4 (Inducible form), isoform CRA_e                             | IVGSKPLVALAQR          | 83.61           | 3.068 | 532.2955318   | 3 | -0.00138   | -0.866  | 357  | 370  |
| IP100554788 | Keratin, type I cytoskeletal 18                                                                    | STFSTNYR               | 60.18           | 1.94  | 528.2135007   | 2 | -0.00065   | -0.616  | 7    | 14   |
| IP100163608 | Isoform 5 of Partitioning defective 3 homolog                                                      | EGHMDALVAQVK           | 1000            | 2.152 | 524.8911129   | 3 | -0.00164   | -1.04   | 1007 | 1019 |
| IP100163608 | Isoform 5 of Partitioning defective 3 homolog                                                      | ERDYAEIQDFHR           | 1000            | 2.073 | 553.57019     | 3 | -0.00161   | -0.969  | 965  | 976  |
| IP100297900 | Probable ATP-dependent RNA helicase DDX10                                                          | LSLKNPEYVWVHEK         | 98.62           | 1.793 | 607.9697261   | 3 | -0.000598  | -0.328  | 266  | 279  |
| IP10163084  | Pre-mRNA-splicing factor SF1                                                                       | RAEYFDGSEVPQNR         | 84.28           | 3.275 | 583.2526241   | 3 | -0.0019    | -1.09   | 466  | 479  |
| IP100976263 | Protein                                                                                            | LCDFGSASHVADNDITPYLVSR | 32.94           | 2.62  | 839.7085567   | 3 | -0.00227   | -0.903  | 336  | 357  |
| IP100008557 | Insulin-like growth factor 2 mRNA-binding protein 1                                                | SGYAFVDCPDHEWAMK       | 20.02           | 2.506 | 664.9270626   | 2 | -0.000754  | -0.378  | 37   | 52   |
| IP100008557 | Insulin-like growth factor 2 mRNA-binding protein 1                                                | SGYAFVDCPDHEWAMK       | 23.99, 1,000.00 | 2.557 | 670.5287886   | 3 | -0.000491  | -0.244  | 37   | 52   |
| IP100177381 | Pre-mRNA-splicing factor CWC22 homolog                                                             | DRDYFDYSR              | 125.88          | 2.041 | 439.503387    | 2 | -0.000415  | -0.316  | 42   | 50   |
| IP100465140 | Transcriptional regulator Kaiso                                                                    | HDDHYELVQGR            | 1000            | 3.824 | 516.8880001   | 3 | -0.000276  | -0.178  | 481  | 492  |
| IP100026167 | NHP2-like protein 1                                                                                | LDDLQVQSSHYK           | 56.2            | 2.333 | 780.8605954   | 2 | -0.000126  | -0.0808 | 22   | 33   |
| IP100965354 | Uncharacterized protein                                                                            | DVGLADRFEYFK           | 1000            | 2.071 | 540.2431636   | 3 | -0.00179   | -1.1    | 98   | 110  |
| IP100718985 | Isoform 2 of Glucocorticoid receptor DNA-binding factor 1                                          | NEENIYVSVHDSTQK        | 27.96           | 3.592 | 676.2845455   | 3 | -0.00164   | -0.809  | 1099 | 1115 |
| IP100170786 | WW domain-binding protein 11                                                                       | LYKENPDIYKELR          | 226.57          | 2.407 | 630.6429439   | 3 | 0.00796    | 4.21    | 95   | 108  |
| IP100306369 | tRNA (cytosine-5)-methyltransferase NSUN2                                                          | QLYHVSFK               | 67.98           | 1.449 | 474.7166135   | 2 | -0.00122   | -1.29   | 559  | 565  |
| IP100306369 | tRNA (cytosine-5)-methyltransferase NSUN2                                                          | KLSSEYISQAK            | 0               | 1.684 | 661.3054196   | 2 | -0.00111   | -0.842  | 650  | 670  |
| IP100377011 | ubiquitin-conjugating enzyme E2 E1 isoform 2                                                       | GDNIYEWR               | 1000            | 2.23  | 566.726196    | 2 | -0.00196   | -1.73   | 56   | 63   |
| IP100646890 | 64 kDa protein                                                                                     | SSDANYPAYESWNR         | 75.44           | 2.55  | 551.8704831   | 2 | -0.000285  | -0.15   | 361  | 375  |
| IP101016009 | cDNA FLJ51486                                                                                      | STSQVNLQPDYINPR        | 231.88          | 2.446 | 962.9619137   | 2 | -0.00112   | -0.584  | 85   | 100  |
| IP100140420 | Staphylococcal nuclease domain-containing protein 1                                                | IWRDyVAPTANLQK         | 155.18          | 2.669 | 623.9675899   | 3 | -0.00311   | -1.66   | 325  | 339  |
| IP100140420 | Staphylococcal nuclease domain-containing protein 1                                                | SEAVVEYVFSGSR          | 74.63           | 2.036 | 755.3350217   | 2 | -0.000308  | -0.204  | 527  | 539  |
| IP100654603 | Isoform 2 of Girdin                                                                                | DSNPATLPR              | 46.21           | 2.242 | 607.266235    | 2 | -0.000881  | -0.726  | 1767 | 1776 |
| IP100607575 | Retinoid X receptor, beta                                                                          | HYGYSEGEK              | 54.16           | 2.37  | 480.5090023   | 3 | -0.0012    | -0.834  | 216  | 226  |
| IP100022521 | Isoform 2 of Dual specificity tyrosine-phosphorylation-regulated kinase 2                          | VTYIQSR                | 27.96           | 1.595 | 555.2550656   | 2 | -0.00092   | -0.83   | 306  | 313  |
| IP100164672 | mRNA-decapping enzyme 1A                                                                           | SASPYHGFTLVNR          | 70.16           | 3.008 | 510.2361446   | 3 | -0.00214   | -1.4    | 60   | 72   |
| IP100006379 | Nucleolar protein 58                                                                               | YGLYHSLVQGTSPK         | 84.93           | 2.477 | 605.3018795   | 3 | 0.000862   | 0.475   | 338  | 353  |
| IP100000874 | Peroxiredoxin-1                                                                                    | SKELYFK                | 100.09          | 2.437 | 484.7100217   | 2 | -0.000808  | -0.835  | 191  | 197  |
| IP100479186 | Isoform M2 of Pyruvate kinase isozymes M1/M2                                                       | LNFSHGTHEYHAETIK       | 43.71           | 3.998 | 491.723022    | 4 | -0.00181   | -0.924  | 74   | 89   |
| IP100479186 | Isoform M2 of Pyruvate kinase isozymes M1/M2                                                       | GDYPLEAVR              | 1000            | 1.353 | 550.2451779   | 2 | -0.0000957 | -0.0871 | 368  | 376  |
| IP100300371 | Isoform 1 of Splicing factor 3B subunit 3                                                          | HIANYSIGQITGHR         | 62.51           | 2.901 | 587.29248     | 3 | -0.00284   | -1.61   | 985  | 999  |
| IP101013558 | cDNA FLJ56464, highly similar to Fetal Alzheimer antigen                                           | GNINNYFK               | 1000            | 2.112 | 525.2258908   | 2 | -0.00177   | -1.69   | 740  | 747  |
| IP100975721 | Uncharacterized protein                                                                            | RDVEVDGRDyHPVTSR       | 90.31           | 3.007 | 524.4812007   | 4 | -0.0022    | -1.05   | 738  | 753  |
| IP100640632 | ROD1 regulator of differentiation 1                                                                | SGPYVQYSHNR            | 69.51           | 2.469 | 524.5716549   | 3 | -0.00141   | -0.898  | 28   | 39   |
| IP100176642 | Serine/threonine-protein kinase 12                                                                 | ENSYFPWYGR             | 0               | 1.356 | 674.771362    | 2 | -0.00143   | -1.06   | 5    | 14   |
| IP100418240 | neuletide isoform 2                                                                                | KPYGNAPYK              | 158.69          | 4.035 | 453.1963802   | 3 | -0.003     | -2.21   | 50   | 59   |
| IP100176637 | Eukaryotic translation initiation factor 2 subunit 2-like protein                                  | LYFLQEQTHSR            | 239.46          | 2.461 | 847.3474118   | 2 | 0.000411   | 0.0835  | 291  | 302  |
| IP100513712 | Isoform 2 of Zinc finger protein 598                                                               | RNEGCVGDEYEEVDR        | 1000            | 2.134 | 634.9339595   | 3 | -0.000998  | -0.524  | 296  | 311  |
| IP100985393 | Protein                                                                                            | TPQEYLR                | 105.44          | 1.233 | 493.7207944   | 2 | -0.00116   | -1.18   | 43   | 49   |
| IP100736859 | Isoform 4 of Heterogeneous nuclear ribonucleoprotein U-like protein 1                              | QNQFYDTQVIKGENSYER     | 18.95           | 2.873 | 852.705505    | 3 | -0.00366   | -1.43   | 7    | 26   |
| IP100411690 | Isoform 2 of La-related protein 1                                                                  | THFDYQFGR              | 84.28           | 2.787 | 471.8589473   | 3 | -0.00173   | -1.23   | 280  | 289  |
| IP100922490 | Isoform 3 of Aryl hydrocarbon receptor nuclear translocator                                        | FSEIHNADMDQSK          | 55.24           | 1.943 | 582.5889888   | 3 | -0.00231   | -1.32   | 543  | 556  |
| IP100006800 | Isoform Long of Autophagy protein 5                                                                | EAEFYLLLR              | 30.97           | 1.793 | 411.722350425 | 2 | 0.000353   | 0.245   | 31   | 41   |
| IP100099522 | Isoform 1 of                                                                                       |                        |                 |       |               |   |            |         |      |      |

|             |                                                                                                |                       |        |       |             |   |            |         |      |      |
|-------------|------------------------------------------------------------------------------------------------|-----------------------|--------|-------|-------------|---|------------|---------|------|------|
| IP100246058 | Programmed cell death 6-interacting protein                                                    | DNDFIYHDRVPLDK        | 1000   | 2.54  | 609.6088253 | 3 | -0.000901  | -0.493  | 314  | 327  |
| IP101014113 | cDNA FLJ50311 fis, clone BRAWH3018548, highly similar to Vinculin                              | SFLDSGVR              | 48.15  | 1.936 | 512.7103268 | 2 | -0.0013    | -1.27   | 743  | 750  |
| IP101013569 | Tight Junction protein ZO-1                                                                    | QYFEQYSR              | 113.53 | 1.872 | 600.7398678 | 2 | -0.000716  | -0.596  | 1190 | 1197 |
| IP100909998 | cDNA FLJ51242, moderately similar to Eukaryotic translation initiation factor 2 s1GyDLSK       | YQYDLSK               | 160.79 | 1.554 | 438.1992795 | 2 | -0.000993  | -1.13   | 81   | 87   |
| IP100909998 | cDNA FLJ51242, moderately similar to Eukaryotic translation initiation factor 2 s1VDKEGKGYDLSK | YQYDLSK               | 67.33  | 1.267 | 492.2445064 | 3 | -0.00186   | -1.26   | 76   | 87   |
| IP100909746 | cDNA FLJ51502, highly similar to 60S ribosomal protein L18a                                    | SSGEIVYCGQVFKE        | 162.6  | 2.38  | 841.8612668 | 2 | 0.000917   | 0.545   | 57   | 70   |
| IP100479307 | Isoform 2 of Myosin-10                                                                         | TGLEDEPRLYLVDR        | 97.01  | 2.058 | 597.2772823 | 3 | -0.00023   | -0.128  | 5    | 18   |
| IP100009328 | Eukaryotic initiation factor 4A-III                                                            | EQYDQVYR              | 88.93  | 1.672 | 583.2504269 | 2 | -0.000977  | -0.0838 | 199  | 206  |
| IP100377261 | Isoform 1 of Far upstream element-binding protein 3                                            | AWEDYK                | 30.97  | 1.562 | 527.6998288 | 2 | -0.000494  | -0.468  | 519  | 525  |
| IP100332552 | Isoform 1 of Zinc finger and BTB domain-containing protein 40                                  | AYQQLSGLWYHNR         | 84.28  | 2.086 | 572.5950313 | 3 | -0.0000826 | -0.0482 | 1014 | 1026 |
| IP100299095 | Sorting nexin-2                                                                                | YLHVGYVPPAPEK         | 54.1   | 2.702 | 554.9473873 | 3 | -0.00331   | -1.99   | 198  | 211  |
| IP100333837 | Isoform 3 of Set1/Ash2 histone methyltransferase complex subunit ASH2                          | EHPDQSGKPEEDYPK       | 85.19  | 2.087 | 640.5946041 | 3 | -0.00226   | -1.18   | 144  | 159  |
| IP100011538 | Cleavage stimulation factor subunit 1                                                          | TQAFVHTELDYVLPDER     | 60.5   | 4.228 | 743.0074459 | 3 | -0.000739  | -0.332  | 357  | 374  |
| IP100651660 | 60S ribosomal protein L3 isoform b                                                             | NNASTDYDLSK           | 60.18  | 2.243 | 711.7752682 | 2 | -0.0000151 | -0.0106 | 252  | 263  |
| IP100550995 | PIH1 domain-containing protein 1                                                               | IQELGDLVTPAPGR        | 30.97  | 2.703 | 805.3848263 | 2 | -0.0012    | -0.745  | 187  | 200  |
| IP100010414 | PDZ and LIM domain protein 2                                                                   | ERYTPPEGEVWTVFPK      | 45.19  | 1.951 | 676.3345333 | 3 | -0.00128   | -0.63   | 313  | 329  |
| IP100011609 | Isoform II of Ubiquitin-protein ligase E3A                                                     | DVTYLTEEK             | 30.97  | 1.728 | 589.2549435 | 2 | -0.00106   | -0.904  | 124  | 132  |
| IP100981806 | Protein                                                                                        | NEYSLTGLNLR           | 61.94  | 2.154 | 703.7916867 | 2 | -0.00204   | -1.45   | 34   | 44   |
| IP100152708 | U3 small nucleolar RNA-associated protein 15 homolog                                           | EILTFKEHSDYR          | 18.95  | 2.829 | 572.9374385 | 3 | -0.00326   | -1.9    | 156  | 168  |
| IP100976019 | Isoform 2 of Regulation of nuclear pre-mRNA domain-containing protein 2                        | LSDTTEYQPLSSYSYHR     | 18.45  | 2.108 | 692.8909566 | 2 | -0.000807  | -0.388  | 826  | 842  |
| IP100647797 | Uncharacterized protein                                                                        | TLHYEGVLVK            | 44.56  | 2.583 | 485.5783538 | 3 | -0.000135  | -0.0925 | 71   | 81   |
| IP100965722 | cDNA FLJ52361, highly similar to T-complex protein 1 subunit epsilon                           | HKLDTVTSVEDYKALQK     | 84.87  | 2.455 | 429.2470698 | 4 | -0.00412   | -2.11   | 209  | 224  |
| IP100797126 | nascent polypeptide-associated complex subunit alpha isoform a                                 | SPASDTYVFGAEK         | 27.96  | 2.634 | 782.8508908 | 2 | 0.00023    | 0.147   | 1977 | 1990 |
| IP100789674 | cDNA FLJ56271, highly similar to Coatomer subunit beta                                         | VHMFHSDYR             | 41.47  | 2.998 | 528.8934932 | 3 | -0.0022    | -1.39   | 63   | 74   |
| IP100792546 | YY1-associated factor 2 isoform 4                                                              | RQPKPSSDEGYWDCVCFTR   | 17.99  | 2.299 | 852.3541256 | 3 | -0.00193   | -0.756  | 12   | 31   |
| IP100479469 | Myeloid/lymphoid or mixed-lineage leukemia                                                     | EYTFPASK              | 60.18  | 1.193 | 585.2497555 | 2 | -0.00034   | -0.291  | 1229 | 1237 |
| IP100018974 | Homeobox protein DLX-2                                                                         | TQYLALPER             | 54.16  | 2.153 | 585.7814328 | 2 | -0.00109   | -0.928  | 174  | 182  |
| IP100025273 | Isoform Long of Trifunctional purine biosynthetic protein adenosine-3                          | GYPGDYTK              | 23.98  | 1.12  | 490.6918942 | 2 | -0.000863  | -0.88   | 343  | 350  |
| IP100478496 | Isoform 1 of Ribonuclease P protein subunit p40                                                | HLVQTHYNYR            | 50.64  | 3.136 | 525.2360836 | 3 | -0.00263   | -1.67   | 31   | 41   |
| IP100856118 | Isoform 2 of Round spermatid basic protein 1-like protein                                      | NLQYLR                | 1000   | 1.633 | 492.2389218 | 2 | -0.00161   | -1.63   | 279  | 285  |
| IP100645510 | Ubiquitin-fold modifier 1                                                                      | ITLTSRPLPYK           | 84.87  | 2.368 | 495.256666  | 3 | -0.00148   | -0.996  | 9    | 20   |
| IP101014295 | 31 kDa protein                                                                                 | MNSYFYLADR            | 51.06  | 2.119 | 655.2675778 | 2 | -0.0015    | -1.14   | 203  | 212  |
| IP100606627 | Coiled-coil domain-containing protein 124                                                      | ELEDAWYKDDKHVMR       | 1000   | 3.307 | 533.2308955 | 4 | -0.00052   | -0.244  | 33   | 48   |
| IP100916540 | 4 kDa protein                                                                                  | LPACVDDGTGYTK         | 30.97  | 3.6   | 810.8427121 | 2 | -0.00296   | -1.83   | 5    | 18   |
| IP100827541 | Isoform 2 of RNA-binding protein 26                                                            | FKVYWHR               | 1000   | 1.853 | 410.2050777 | 3 | -0.00364   | -2.97   | 598  | 605  |
| IP100647664 | Uncharacterized protein                                                                        | cDTCQYFSR             | 50.64  | 2.325 | 722.7550046 | 2 | -0.000573  | -0.397  | 311  | 320  |
| IP100292221 | Ribosome production factor 1                                                                   | YGEVWVHKPR            | 44.56  | 2.137 | 515.2294918 | 3 | -0.000701  | -0.454  | 328  | 338  |
| IP100022143 | Isoform 1 of Extended synaptotagmin-1                                                          | HLSPLATLVGDSSHK       | 24.95  | 3.38  | 598.280273  | 3 | -0.00206   | -1.15   | 818  | 838  |
| IP100013452 | Bifunctional aminoacyl-tRNA synthetase                                                         | SLIGVEYKPSATGAEDKKKK  | 50.92  | 3.355 | 579.5437007 | 4 | -0.0026    | -1.12   | 944  | 964  |
| IP100216691 | Profilin-1                                                                                     | cYEMASHLR             | 122.98 | 2.227 | 416.1629329 | 2 | -0.00184   | -1.48   | 128  | 136  |
| IP100012198 | Uncharacterized protein C1orf50                                                                | ESGQYFSTISPK          | 53.49  | 2.113 | 782.3582761 | 2 | -0.000999  | -0.639  | 126  | 138  |
| IP100982620 | cDNA FLJ61765, highly similar to 4-trimethylaminobutylaldehyde dehydrogenaseVTIEYISLQY         | YIEYISLQY             | 30.97  | 2.212 | 662.3156125 | 2 | -0.000427  | -0.322  | 402  | 411  |
| IP100174976 | Isoform 1 of MAGUK p55 subfamily member 5                                                      | DQEVAGRDYHFVSR        | 79.3   | 2.837 | 586.924255  | 3 | -0.00301   | -1.71   | 520  | 533  |
| IP100945578 | 12 kDa protein                                                                                 | VDFYIASK              | 160.79 | 2.357 | 511.7334592 | 2 | -0.000933  | -0.913  | 44   | 51   |
| IP100719070 | Isoform 3 of Zinc finger CCHC-type with G patch domain-containing protein                      | ITVDNDGYIYK           | 0      | 1.152 | 734.3237302 | 2 | -0.00139   | -0.948  | 249  | 257  |
| IP100471928 | ATP synthase subunit alpha                                                                     | EAYPGDYFVHLSR         | 60.5   | 1.422 | 545.2399898 | 2 | -0.00097   | -0.555  | 285  | 297  |
| IP100980953 | Uncharacterized protein                                                                        | NNCPFSADENRPLAK       | 93.15  | 3.648 | 659.2838131 | 3 | -0.0016    | -0.811  | 956  | 971  |
| IP100797067 | U2 snRNP-specific A' protein                                                                   | LVYIKVQVQR            | 89.77  | 1.644 | 486.6020809 | 3 | -0.00163   | -1.12   | 133  | 143  |
| IP101011073 | cDNA FLJ54446, highly similar to Superkiller viralicid activity 2-like 2                       | SFYQFQHYR             | 89.22  | 1.75  | 452.5240169 | 3 | -0.000926  | -0.683  | 487  | 495  |
| IP100794580 | cDNA FLJ54078, highly similar to Protein arginine N-methyltransferase 5                        | YSQQQAQYK             | 107.02 | 2.057 | 686.302612  | 2 | -0.00123   | -0.895  | 290  | 299  |
| IP100293884 | Isoform 2 of Kinesin-like protein KIF23                                                        | KCSQTKLQDVPYGLYR      | 291.47 | 2.65  | 634.6360469 | 3 | -0.00122   | -1.16   | 16   | 31   |
| IP101012473 | cDNA FLJ57418, highly similar to Short/branched chain specific acyl-CoA dehydrogenaseVYLVNGSK  | YLVNGSK               | 24.95  | 2.244 | 546.9077144 | 3 | 0.00207    | 1.26    | 90   | 103  |
| IP100295857 | Isoform 1 of Coatomer subunit alpha                                                            | GNVYCLDR              | 1000   | 1.585 | 595.7369992 | 2 | -0.000418  | -0.352  | 573  | 583  |
| IP100295857 | Isoform 1 of Coatomer subunit alpha                                                            | GHYNNVSCAVFHR         | 18.95  | 1.929 | 579.9161983 | 3 | 0.000953   | 0.548   | 245  | 260  |
| IP100301058 | Vasodilator-stimulated phosphoprotein                                                          | YVYHNPTANSFR          | 103.45 | 2.699 | 542.9185176 | 3 | -0.00302   | -1.86   | 36   | 48   |
| IP100022334 | Omithine aminotransferase, mitochondrial                                                       | YGAHNHPLPALER         | 79.44  | 3.095 | 606.2892452 | 3 | -0.00154   | -0.848  | 50   | 64   |
| IP100292382 | Isoform 1 of mRNA-decapping enzyme 2                                                           | DYKDDYIELR            | 165.1  | 2.329 | 561.5755001 | 3 | -0.00314   | -1.87   | 155  | 166  |
| IP100981155 | Protein                                                                                        | YTFYHVPHTSDASK        | 37.77  | 2.442 | 621.2638546 | 3 | -0.00191   | -2.1    | 106  | 120  |
| IP100647067 | Isoform 2 of Polypyrimidine tract-binding protein 2                                            | NQPIYIQYNSHK          | 40.26  | 2.057 | 528.912109  | 3 | -0.00055   | -0.347  | 123  | 134  |
| IP100295457 | Isoform 2 of Myosin phosphatase Rho-interacting protein                                        | VRVSGYFSELEK          | 84.46  | 2.079 | 498.5728145 | 3 | -0.00133   | -0.892  | 261  | 272  |
| IP100965993 | cDNA FLJ95176, Homo sapiens CGI-48 protein (CGI-48), mRNA                                      | IQSYLER               | 60.18  | 1.47  | 551.2704465 | 2 | -0.00156   | -1.41   | 264  | 271  |
| IP100020898 | Ribosomal protein S6 kinase alpha-3                                                            | TYEYVLAQGVVHR         | 72.65  | 2.274 | 530.2590938 | 3 | -0.00221   | -1.32   | 526  | 538  |
| IP100979136 | Ribonucleoside-diphosphate reductase                                                           | IIDINYPVPEAGLSNKR     | 54.16  | 3.091 | 749.028564  | 3 | -0.00095   | -1.31   | 450  | 467  |
| IP100003843 | Isoform A1 of Tight Junction protein ZO-2                                                      | IEIAQKHPIDYAVPIK      | 1000   | 2.624 | 639.00592   | 3 | -0.00762   | -3.98   | 1108 | 1123 |
| IP100946673 | cDNA FLJ57866, highly similar to Homo sapiens TAF8 RNA polymerase II, TATA 1PTTYRFPVSDYQVLR    | YQYDLSK               | 37.97  | 2.45  | 635.3033443 | 3 | -0.00124   | -0.653  | 99   | 113  |
| IP100876873 | Uncharacterized protein                                                                        | TETNRYFK              | 88.93  | 1.807 | 541.2337033 | 2 | -0.00114   | -1.06   | 91   | 99   |
| IP100291284 | Isoform 3 of Histone-lysine N-methyltransferase EZH1                                           | QcPcYLAVR             | 1000   | 1.913 | 623.759155  | 2 | -0.000972  | -0.78   | 531  | 539  |
| IP100966516 | Uncharacterized protein                                                                        | AcQSYPLHDVDFVR        | 43.97  | 2.459 | 595.6114498 | 3 | -0.000893  | -0.5    | 81   | 94   |
| IP100983590 | origin recognition complex subunit 3 isoform 3                                                 | IALHTALNNPYLTK        | 21.95  | 3.199 | 625.313293  | 3 | -0.0012    | -0.639  | 454  | 468  |
| IP100021290 | ATP-citrate synthase                                                                           | DCQYVLDLAAK           | 1000   | 2.34  | 622.3023678 | 2 | -0.000816  | -0.656  | 210  | 220  |
| IP100021290 | ATP-citrate synthase                                                                           | EGDYVLFHHEGGVDGVDVAK  | 1000   | 2.113 | 780.005981  | 3 | -0.000934  | -0.399  | 128  | 148  |
| IP101014546 | protein arginine N-methyltransferase 1 isoform 1                                               | TGFSTSPESPYTHWK       | 21.95  | 3.259 | 602.2570186 | 3 | -0.00302   | -1.67   | 299  | 313  |
| IP101013554 | Transcriptional repressor p66-beta                                                             | TTSSAIVMNLASHIQPQVYNR | 60.19  | 2.453 | 781.0369258 | 3 | -0.0061    | -2.61   | 311  | 331  |
| IP100981739 | Uncharacterized protein                                                                        | RLAAAYLDLQR           | 1000   | 2.365 | 476.5731197 | 3 | -0.00122   | -0.853  | 46   | 56   |
| IP100024067 | Isoform 1 of Clathrin heavy chain 1                                                            | FLRENYPYDSR           | 46.21  | 2.535 | 513.8928829 | 3 | -0.000328  | -0.213  | 893  | 907  |
| IP100027705 | Isoform 1 of DNA primase large subunit                                                         | IILSNPPSQGDYHGPFPR    | 41.18  | 2.714 | 713.3217769 | 3 | -0.00361   | -1.69   | 370  | 387  |
| IP100017339 | Splicing factor 3B subunit 4                                                                   | NQDATYVGGLEDK         | 60.18  | 2.28  | 794.847778  | 2 | -0.0021    | -1.32   | 10   | 23   |
| IP100642862 | Peptidyl-prolyl cis-trans isomerase-like 4                                                     | YNNYVLIHNVQR          | 21.95  | 2.03  | 574.9200435 | 3 | -0.00181   | -1.05   | 36   | 47   |
| IP100334400 | Isoform 2 of Plakophilin-4                                                                     | SAVSPDLHTPIYEGR       | 49.77  | 2.651 | 612.2961422 | 3 | -0.00145   | -0.79   | 403  | 418  |
| IP100334400 | Isoform 2 of Plakophilin-4                                                                     | SITTHYVDFYSTEK        | 54.16  | 2.562 | 753.313049  | 2 | -0.00185   | -1.23   | 1121 | 1132 |
| IP100171044 | Schlafen family member 11                                                                      | AKQHLVFPWGGH          | 1000   | 2.381 | 545.2609859 | 3 | -0.000919  | -0.562  | 889  | 901  |
| IP100015973 | Band 4.1-like protein 2                                                                        | VEGDNIYR              | 1000   | 1.925 | 572.7551266 | 2 | -0.0016    | -1.4    | 617  | 625  |
| IP100644506 | cDNA FLJ58756, highly similar to Nuclear pore complex protein Nup93                            | AVYCIIGR              | 1000   | 1.913 | 516.2409665 | 2 | -0.000884  | -0.857  | 266  | 273  |
| IP100438287 | Isoform 2 of Protein LAP2                                                                      | RAQIQEVDYLSYR         | 43.97  | 2.852 | 549.9216304 | 3 | -0.00409   | -2.48   | 1096 | 1108 |
| IP100398779 | Isoform 4 of Plectin                                                                           | GySPYSVSGSGSTAGSR     | 30.97  | 2.466 | 931.8830563 | 2 | -0.00144   | -0.772  | 4473 | 4490 |
| IP100746351 | Isoform 1 of Exosome complex exonuclease RRP44                                                 | SAPYIKR               | 122.33 | 1.601 | 450.7204587 | 2 | -0.00133   | -1.48   | 102  | 108  |
| IP100549205 | Isoform 2 of DNA repair protein RAD50                                                          | GQDIEVEIR             | 1000   | 2.073 | 658.3007199 | 2 | -0.000112  | -0.0849 | 1163 | 1172 |
| IP100645201 | 40S ribosomal protein S8                                                                       | QWESHYALPL            |        |       |             |   |            |         |      |      |

|             |                                                           |                     |        |       |             |   |            |         |      |      |
|-------------|-----------------------------------------------------------|---------------------|--------|-------|-------------|---|------------|---------|------|------|
| IP100219005 | Peptidyl-prolyl cis-trans isomerase FKBP4                 | GEHSIVLKPSPYAFSGVKG | 64.24  | 2.625 | 707.0135494 | 3 | -0.00163   | -0.768  | 214  | 232  |
| IP100878789 | 13 kDa protein                                            | FDLcQYHKPASK        | 48.16  | 2.321 | 574.2571407 | 3 | -0.00022   | -0.128  | 71   | 83   |
| IP100030320 | Probable ATP-dependent RNA helicase DDX6                  | GVYQYAYVYTR         | 27.96  | 1.911 | 765.3371579 | 2 | -0.00124   | -0.808  | 308  | 319  |
| IP100854630 | Uncharacterized protein                                   | SGYTLYHSLHHYK       | 48.15  | 1.557 | 616.941711  | 3 | -0.00154   | -0.835  | 1073 | 1086 |
| IP100301609 | Serine/threonine-protein kinase Nek9                      | AGGGAAEQEELHYIPR    | 1000   | 2.436 | 630.9630123 | 3 | -0.00194   | -1.03   | 40   | 56   |
| IP100852604 | SET binding factor 1                                      | TFLLDSYER           | 60.18  | 1.588 | 669.7846066 | 2 | -0.000638  | -0.477  | 82   | 91   |
| IP100980964 | Isoform 4 of Roundabout homolog 1                         | NGLTSTYAGIR         | 30.97  | 2.289 | 616.7872311 | 2 | -0.00109   | -0.884  | 887  | 897  |
| IP100290566 | T-complex protein 1 subunit alpha                         | DDKHGSYEDAVHSGALND  | 0      | 3.448 | 670.6008297 | 3 | -0.00119   | -0.591  | 539  | 556  |
| IP100290566 | T-complex protein 1 subunit alpha                         | HGSGYEDAVHSGALND    | 21.95  | 2.63  | 551.2172847 | 3 | -0.00282   | -1.71   | 542  | 556  |
| IP100291006 | Malate dehydrogenase, mitochondrial                       | GyLGPQLDCLK         | 1000   | 1.945 | 785.354675  | 2 | -0.00127   | -0.807  | 79   | 91   |
| IP100470361 | Isoform 2 of Kin of IRRE-like protein 1                   | AVLVADYR            | 56.2   | 1.534 | 525.7360837 | 2 | -0.00178   | -1.7    | 635  | 642  |
| IP100004358 | Glycogen phosphorylase, brain form                        | ARPEYMLPVHYGR       | 234.34 | 2.051 | 605.9512325 | 3 | -0.00258   | -1.42   | 193  | 206  |
| IP100012206 | Isoform 1 of F02 and LIM domain protein 4                 | GyTFLEDR            | 1000   | 2.023 | 563.7344257 | 2 | -0.0008081 | -0.0711 | 292  | 299  |
| IP100789249 | Isoform 3 of Spindle and kinetochore-associated protein 3 | ALDGEESDFEDYPMR     | 112.7  | 1.585 | 927.3516232 | 2 | 0.00109    | 0.591   | 28   | 42   |
| IP101010055 | cDNA FLJ58379, highly similar to Annexin A11              | SlyHDSIGDSTGSDYKQ   | 23.2   | 3.26  | 631.9385372 | 3 | -0.00227   | -1.2    | 447  | 462  |
| IP101688885 | Isoform 1 of Putative ATP-dependent RNA helicase DHX57    | NDGyVHPHSSVYQYKR    | 154.89 | 3.802 | 688.9807125 | 3 | -0.00274   | -1.33   | 1258 | 1274 |
| IP100024662 | Chromobox protein homolog 5                               | LTWHAYPEDANKEK      | 65.46  | 2.637 | 637.6156612 | 3 | -0.00139   | -0.729  | 175  | 186  |
| IP100328154 | NEDB8-activating enzyme E1 catalytic subunit              | LPEHcDYER           | 1000   | 1.934 | 465.8752742 | 3 | -0.00312   | -2.23   | 242  | 254  |
| IP101011319 | annexin A6 isoform 2                                      | SlySMIK             | 24.95  | 1.236 | 461.2110898 | 2 | -0.00137   | -1.49   | 268  | 274  |
| IP100019812 | Serine/threonine-protein phosphatase 5                    | TQANDYFK            | 122.05 | 1.562 | 533.7153928 | 2 | -0.00177   | -1.66   | 33   | 40   |
| IP100000606 | Tetratricopeptide repeat protein 4                        | AAQYVGLNFR          | 30.97  | 1.622 | 677.3035275 | 2 | 0.0000349  | 0.00258 | 124  | 134  |
| IP100979595 | Uncharacterized protein                                   | TySLYTDLWK          | 0      | 2.591 | 733.8346554 | 2 | 0.000459   | 0.313   | 189  | 199  |
| IP100013774 | Histone deacetylase 1                                     | YyAVNYPLR           | 0      | 1.542 | 619.7843625 | 2 | -0.000127  | -0.102  | 221  | 229  |
| IP100642048 | Uncharacterized protein                                   | YyRPTVEVDFLQGDCTK   | 0      | 4.016 | 691.2996212 | 3 | -0.000678  | -0.327  | 293  | 308  |

#### K650E-FGFR3-Myr(-)-shN1

|             |                                                                                       |                    |                    |       |             |   |             |          |     |     |
|-------------|---------------------------------------------------------------------------------------|--------------------|--------------------|-------|-------------|---|-------------|----------|-----|-----|
| IP100955014 | cyclin-dependent kinase 1 isoform 1                                                   | IGEGTYGVVYK        | 30.97              | 3.808 | 633.2941891 | 2 | -0.00147    | -1.16    | 10  | 20  |
| IP100955014 | cyclin-dependent kinase 1 isoform 1                                                   | IGEGTYGVVYKGR      | 118.47             | 2.924 | 493.5729976 | 2 | -0.00128    | -0.868   | 10  | 22  |
| IP100955014 | cyclin-dependent kinase 1 isoform 1                                                   | IEKIGEGYGVVYK      | 57.12, 60.19       | 1.6   | 572.5946651 | 3 | -0.00171    | -0.998   | 7   | 20  |
| IP100955014 | cyclin-dependent kinase 1 isoform 1                                                   | IGEGTYGVVYK        | 95.96, 77.52       | 3.015 | 673.2774655 | 2 | -0.00125    | -0.93    | 10  | 20  |
| IP100955014 | cyclin-dependent kinase 1 isoform 1                                                   | IEKIGEGTYGVVYK     | 27.96              | 2.723 | 545.9395748 | 3 | -0.00052    | -0.399   | 7   | 20  |
| IP100013174 | Isoform 1 of RNA-binding protein 14                                                   | LAELSDYR           | 60.18              | 2.139 | 523.7316891 | 2 | -0.000473   | -0.452   | 608 | 615 |
| IP100013174 | Isoform 1 of RNA-binding protein 14                                                   | SSLDYR             | 93.41              | 1.501 | 410.8654355 | 2 | -0.00118    | -1.44    | 631 | 636 |
| IP100013174 | Isoform 1 of RNA-binding protein 14                                                   | VIECDVYKDYAFVHMEK  | 1000               | 1.882 | 721.3284908 | 3 | -0.00067    | -0.31    | 105 | 121 |
| IP100013174 | Isoform 1 of RNA-binding protein 14                                                   | LAELSDYR           | 33.56              | 1.629 | 401.5238643 | 3 | -0.00118    | -0.984   | 608 | 616 |
| IP100013174 | Isoform 1 of RNA-binding protein 14                                                   | RLPDAHSDYAR        | 39.54              | 2.548 | 460.8734432 | 3 | -0.00155    | -1.12    | 637 | 647 |
| IP100013174 | Isoform 1 of RNA-binding protein 14                                                   | YSGSYNDLYR         | 88.93              | 2.879 | 659.2614133 | 2 | -0.000225   | -0.171   | 648 | 657 |
| IP100013174 | Isoform 1 of RNA-binding protein 14                                                   | RLAELSDYR          | 53.49              | 1.473 | 453.5575252 | 3 | -0.0013     | -0.958   | 607 | 616 |
| IP100152906 | Histone H2B type 1-D                                                                  | KESYSYVYK          | 84.46              | 3.467 | 449.2074276 | 3 | -0.00139    | -1.04    | 35  | 44  |
| IP100152906 | Histone H2B type 1-D                                                                  | ESYSYVYK           | 50.64              | 2.112 | 609.2603757 | 2 | -0.0001     | -0.0823  | 36  | 44  |
| IP100941201 | Isoform 1 of Peptidyl-prolyl cis-trans isomerase NIMA-interacting 4                   | FyGHIIIVVEGR       | 1,000.00, 1,000.00 | 2.032 | 473.216003  | 3 | -0.00168    | -1.19    | 120 | 130 |
| IP100941201 | Isoform 1 of Peptidyl-prolyl cis-trans isomerase NIMA-interacting 4                   | FyGHIIIVVEGR       | 1000               | 3.535 | 701.3231198 | 2 | -0.000712   | -0.508   | 120 | 130 |
| IP100941201 | Isoform 1 of Peptidyl-prolyl cis-trans isomerase NIMA-interacting 4                   | TKFGYHIIIVVEGR     | 38.25              | 2.495 | 544.2655025 | 2 | -0.000969   | -0.594   | 118 | 130 |
| IP100000000 | FGFR3 Mutant                                                                          | DVHNLdYK           | 58.42              | 2.965 | 623.7680029 | 2 | -0.000846   | -0.678   | 641 | 649 |
| IP100000000 | FGFR3 Mutant                                                                          | DVHNLdYKETTNGRLPVK | 0                  | 2.925 | 781.377502  | 3 | -0.00157    | -0.671   | 641 | 659 |
| IP100000000 | FGFR3 Mutant                                                                          | DVHNLdYKETTNGRLPVK | 118.47, 125.88     | 3.221 | 808.0327755 | 3 | -0.00208    | -0.859   | 641 | 659 |
| IP100000000 | FGFR3 Mutant                                                                          | DVHNLdYKETTNGR     | 128.78, 110.85     | 3.41  | 662.2665401 | 3 | -0.000488   | -0.246   | 641 | 655 |
| IP100000000 | FGFR3 Mutant                                                                          | DVHNLdYKETTNGR     | 23.2               | 2.96  | 476.9601131 | 4 | -0.00115    | -0.603   | 641 | 655 |
| IP100000000 | FGFR3 Mutant                                                                          | DVLSaYQVQR         | 79.9               | 2.254 | 681.300357  | 2 | 0.000391    | 0.287    | 593 | 603 |
| IP100010740 | Isoform Long of Splicing factor, proline- and glutamine-rich                          | FAHQGTFFEYSQR      | 70.57              | 3.536 | 621.8784787 | 2 | 0.000306    | 0.166    | 480 | 493 |
| IP100012074 | Isoform 1 of Heterogeneous nuclear ribonucleoprotein R                                | STAYEDYVYHPPRR     | 24.95              | 3.73  | 613.8586929 | 3 | -0.0013     | -0.706   | 428 | 441 |
| IP100012074 | Isoform 1 of Heterogeneous nuclear ribonucleoprotein R                                | LKDYAFVHFEDR       | 1000               | 2.863 | 540.5803218 | 3 | -0.000711   | -0.439   | 373 | 384 |
| IP100216190 | Isoform 2 of Glycogen synthase kinase-3 beta                                          | GERPVSYcSR         | 30.97              | 2.573 | 681.2813107 | 2 | -0.0013     | -0.951   | 210 | 220 |
| IP100939558 | cDNA FLJ38696 fs, clone KIDNE2001931, highly similar to HETEROGENEOUS NUDYGHSSRDdYPSR |                    | 24.95              | 2.465 | 574.5563961 | 3 | -0.00219    | -1.27    | 232 | 245 |
| IP100939558 | cDNA FLJ38696 fs, clone KIDNE2001931, highly similar to HETEROGENEOUS NUDYDySSR       |                    | 30.97              | 1.898 | 536.6847531 | 2 | -0.000745   | -0.695   | 297 | 304 |
| IP100939558 | cDNA FLJ38696 fs, clone KIDNE2001931, highly similar to HETEROGENEOUS NUDSYESYGNSR    |                    | 61.94              | 2     | 629.224548  | 2 | -0.00116    | -0.919   | 207 | 219 |
| IP100939558 | cDNA FLJ38696 fs, clone KIDNE2001931, highly similar to HETEROGENEOUS NUDSYSSRDyPSSR  |                    | 35.84              | 2.357 | 500.5317073 | 3 | -0.000855   | -0.57    | 205 | 276 |
| IP100939558 | cDNA FLJ38696 fs, clone KIDNE2001931, highly similar to HETEROGENEOUS NUDSLySSGR      |                    | 30.97              | 2.022 | 462.6933285 | 2 | 0.00111     | 1.15     | 319 | 326 |
| IP100939558 | cDNA FLJ38696 fs, clone KIDNE2001931, highly similar to HETEROGENEOUS NUDVYLSPR       |                    | 81.61              | 1.566 | 465.2100522 | 2 | -0.00115    | -1.23    | 191 | 197 |
| IP100515061 | Histone H2B type 1-J                                                                  | ESYSYVYK           | 60.18              | 1.661 | 616.2684933 | 2 | 0.000435    | 0.353    | 36  | 44  |
| IP100515061 | Histone H2B type 1-J                                                                  | KESYSYVYK          | 53.49              | 2.93  | 453.8793941 | 3 | -0.00119    | -0.878   | 35  | 44  |
| IP100909232 | cDNA FLJ53542, highly similar to Heterogeneous nuclear ribonucleoproteins C           | MySYPAR            | 58.42              | 2.259 | 484.1913144 | 2 | -0.0000228  | -0.0235  | 123 | 129 |
| IP100797148 | Isoform 2 of Heterogeneous nuclear ribonucleoprotein A1                               | SSGGYGGGGYQYAFKPR  | 216.75             | 5.664 | 570.2539669 | 3 | -0.00238    | -1.39    | 232 | 247 |
| IP100797148 | Isoform 2 of Heterogeneous nuclear ribonucleoprotein A1                               | NQGGYGGSSSSSYSGSR  | 88.93              | 2.298 | 887.8370969 | 2 | -0.000558   | -0.314   | 248 | 265 |
| IP100301503 | Isoform 1 of Transformer-2 protein homolog beta                                       | AAQDRDQYR          | 1000               | 2.31  | 658.2933957 | 2 | -0.00076    | -0.578   | 252 | 261 |
| IP100301503 | Isoform 1 of Transformer-2 protein homolog beta                                       | GVDYDRDYSR         | 23.2               | 2.355 | 463.841827  | 2 | -0.0015     | -1.08    | 229 | 238 |
| IP100844578 | ATP-dependent RNA helicase A                                                          | GANKDYYSR          | 42.13              | 3.319 | 422.854073  | 3 | -0.00145    | -1.15    | 142 | 151 |
| IP100844578 | ATP-dependent RNA helicase A                                                          | DFVWLYR            | 1000               | 1.832 | 553.2581784 | 2 | 0.000205    | 0.186    | 64  | 71  |
| IP100844578 | ATP-dependent RNA helicase A                                                          | NFLYAWGKR          | 1000               | 1.914 | 619.7570187 | 2 | -0.000779   | -0.629   | 6   | 14  |
| IP100844578 | ATP-dependent RNA helicase A                                                          | NFLYAWGKR          | 1000               | 2.18  | 465.5408016 | 2 | -0.00134    | -0.959   | 6   | 15  |
| IP100604620 | Nucleolin                                                                             | NLUVYTDQELK        | 78.53              | 2.263 | 509.9199825 | 3 | -0.00193    | -1.26    | 399 | 410 |
| IP100604620 | Nucleolin                                                                             | SISLYVTGK          | 30.97              | 2.291 | 620.7786252 | 2 | -0.000901   | -0.726   | 458 | 467 |
| IP100604620 | Nucleolin                                                                             | SISLYYTGKGGQYDQYR  | 24.95              | 2.639 | 701.3131099 | 3 | -0.000353   | 0.168    | 458 | 474 |
| IP100604620 | Nucleolin                                                                             | GIAYIEFK           | 1000               | 1.762 | 510.7443234 | 2 | -0.00004472 | -0.00462 | 430 | 437 |
| IP100604620 | Nucleolin                                                                             | KFGYVDFESAEDLEK    | 129.43             | 3.173 | 619.6043697 | 3 | -0.00227    | -1.22    | 348 | 362 |
| IP100171903 | Isoform 1 of Heterogeneous nuclear ribonucleoprotein M                                | GGNRFEPANPTK       | 84.46              | 1.126 | 765.8378903 | 2 | -0.00637    | -4.16    | 57  | 69  |
| IP100171903 | Isoform 1 of Heterogeneous nuclear ribonucleoprotein M                                | GGNRFEPANPTKR      | 184.04             | 4.87  | 562.9299923 | 3 | -0.0011     | -0.652   | 57  | 70  |
| IP100171903 | Isoform 1 of Heterogeneous nuclear ribonucleoprotein M                                | FFEPANPTKR         | 98.63              | 2.49  | 434.86795   | 3 | -0.000227   | -0.174   | 61  | 70  |
| IP100171903 | Isoform 1 of Heterogeneous nuclear ribonucleoprotein M                                | DKFNECGHLYADIK     | 1000               | 2.829 | 630.2818599 | 3 | -0.000762   | -0.403   | 671 | 685 |
| IP100215884 | Isoform ASF-1 of Serine/arginine-rich splicing factor 1                               | DGYDYDGLR          | 96.95              | 2.137 | 491.5328365 | 3 | -0.00207    | -1.4     | 75  | 85  |
| IP100215884 | Isoform ASF-1 of Serine/arginine-rich splicing factor 1                               | SHEGETAYR          | 44.63              | 2.384 | 621.7615353 | 2 | -0.000381   | -0.307   | 182 | 191 |
| IP100215884 | Isoform ASF-1 of Serine/arginine-rich splicing factor 1                               | DGYDYDGYR          | 30                 | 1.49  | 602.2033688 | 2 | -0.000814   | -0.676   | 75  | 83  |
| IP100215884 | Isoform ASF-1 of Serine/arginine-rich splicing factor 1                               | KEDMTYAVR          | 0                  | 2.346 | 596.7572018 | 2 | -0.000848   | -0.711   | 165 | 173 |
| IP100479217 | Isoform Short of Heterogeneous nuclear ribonucleoprotein U                            | GyFEYIEENKYSR      | 120.11             | 2.999 | 593.2540279 | 3 | -0.000993   | -0.559   | 237 | 249 |
| IP100479217 | Isoform Short of Heterogeneous nuclear ribonucleoprotein U                            | EDHGRGyFEYIEENKYSR | 30.66              | 4.288 | 573.555537  | 4 | 0.000213    | 0.0899   | 232 | 249 |
| IP100479217 | Isoform Short of Heterogeneous nuclear ribonucleoprotein U                            | EDHGRGyFEYIEENK    | 91.01              | 3.214 | 655.9391475 | 3 | -0.000334   | -0.17    | 232 | 246 |
| IP100479217 | Isoform Short of Heterogeneous nuclear ribonucleoprotein U                            | GyFEYIEENK         | 105.08             | 1.869 | 686.2791745 | 2 | -0.000503   | -0.366   | 237 | 246 |
| IP100456887 | Heterogeneous nuclear ribonucleoprotein U-like protein 2                              | NyYGYQGYR          | 67.96              | 2.315 | 632.2458493 | 2 | 0.000347    | 0.275    | 739 | 747 |
| IP100456887 | Heterogeneous nuclear ribonucleoprotein U-like protein 2                              | FYGRDyEYNR         | 37.97</            |       |             |   |             |          |     |     |



|             |                                                                                            |                          |                 |        |             |   |            |         |      |      |
|-------------|--------------------------------------------------------------------------------------------|--------------------------|-----------------|--------|-------------|---|------------|---------|------|------|
| IP10001298  | Isoform 1 of Cleavage and polyadenylation specificity factor subunit 6                     | GAAPNVVYTYGKR            | 27.96           | 2.958  | 526.2556148 | 3 | -0.00133   | -0.845  | 67   | 80   |
| IP100013891 | Isoform Long of Transformer-2 protein homolog alpha                                        | GDRYEDYDYR               | 47.48           | 1.652  | 532.2001339 | 3 | -0.000475  | -0.298  | 245  | 255  |
| IP100012340 | Serine/arginine-rich splicing factor 9                                                     | SHEGETYIR                | 0               | 2.003  | 629.7584836 | 2 | -0.00138   | -1.1    | 172  | 181  |
| IP100012340 | Serine/arginine-rich splicing factor 9                                                     | GPPIYSPFRPY              | 46.67           | 1.566  | 767.8294675 | 2 | -0.000917  | -0.597  | 210  | 221  |
| IP100012340 | Serine/arginine-rich splicing factor 9                                                     | KEDMEYLR                 | 1000            | 1.614  | 617.7624509 | 2 | -0.00095   | -0.769  | 155  | 163  |
| IP100438229 | Isoform 1 of Transcription intermediary factor 1-beta                                      | KLIVFQLHR                | 1000            | 3.826  | 433.236351  | 3 | -0.0000713 | -0.055  | 366  | 374  |
| IP100438229 | Isoform 1 of Transcription intermediary factor 1-beta                                      | LIVFQLHR                 | 1000            | 2.493  | 585.2969968 | 3 | -0.00116   | -0.99   | 367  | 374  |
| IP100438229 | Isoform 1 of Transcription intermediary factor 1-beta                                      | DQLNAHKDHQYQLEDAVR       | 1000            | 3.804  | 642.5339961 | 4 | -0.00158   | -0.616  | 231  | 250  |
| IP100032830 | Isoform 1 of Oligoribonuclease, mitochondrial (Fragment)                                   | RWYPEEYFAPK              | 118.24          | 2.935  | 565.5798336 | 3 | -0.00178   | -1.05   | 178  | 189  |
| IP100032830 | Isoform 1 of Oligoribonuclease, mitochondrial (Fragment)                                   | WYPEEYFAPK               | 107.3           | 1.698  | 769.8162228 | 2 | 0.0000941  | 0.0612  | 179  | 189  |
| IP100032830 | Isoform 1 of Oligoribonuclease, mitochondrial (Fragment)                                   | RWYPEEYFAPK              | 111.56          | 2.572  | 608.2783809 | 3 | -0.00113   | -0.622  | 178  | 190  |
| IP100011913 | Heterogeneous nuclear ribonucleoprotein A0                                                 | EDYSGGGGGSR              | 27.96           | 1.973  | 646.2512814 | 2 | -0.00109   | -0.843  | 177  | 189  |
| IP100011913 | Heterogeneous nuclear ribonucleoprotein A0                                                 | GFQVYVFNHDAADK           | 1000            | 3.917  | 599.2537838 | 3 | -0.00253   | -1.41   | 140  | 154  |
| IP100011913 | Heterogeneous nuclear ribonucleoprotein A0                                                 | RGFGVYVFNHDAADK          | 1000            | 2.263  | 651.289001  | 3 | 0.00203    | 1.04    | 139  | 154  |
| IP100011913 | Heterogeneous nuclear ribonucleoprotein A0                                                 | GFQVYVFNHDAADKAAVVK      | 1000            | 2.066  | 755.3558956 | 3 | -0.00219   | -0.967  | 140  | 159  |
| IP100011913 | Heterogeneous nuclear ribonucleoprotein A0                                                 | AVPKEDYSGGGGGSR          | 24.95           | 2.598  | 562.9214473 | 3 | -0.000435  | -0.258  | 173  | 189  |
| IP100916600 | Uncharacterized protein                                                                    | VFDKDGNGYISAEALR         | 27.96           | 2.699  | 917.9226071 | 2 | -0.000437  | -0.238  | 139  | 154  |
| IP100916600 | Uncharacterized protein                                                                    | DNGYISAEALR              | 60.18           | 2.746  | 673.2935788 | 2 | 0.000306   | 0.227   | 143  | 154  |
| IP100910458 | Heterogeneous nuclear ribonucleoprotein K                                                  | GGDLMAVDRR               | 1000            | 2.034  | 617.2576291 | 2 | -0.00149   | -1.21   | 293  | 302  |
| IP100910458 | Heterogeneous nuclear ribonucleoprotein K                                                  | RDYODMSPR                | 86.37           | 1.279  | 617.7319333 | 2 | -0.000485  | -0.393  | 254  | 262  |
| IP100418471 | Vimentin                                                                                   | HLREYQQLLVK              | 1000            | 3.871  | 536.6030269 | 3 | -0.0014    | -0.868  | 379  | 390  |
| IP100418471 | Vimentin                                                                                   | FANVDKVR                 | 1000            | 2.964  | 402.5290218 | 3 | -0.000511  | -0.507  | 114  | 122  |
| IP100418471 | Vimentin                                                                                   | SLYASSPGGVYATR           | 17.98           | 3.554  | 754.842529  | 2 | -0.00139   | -0.924  | 51   | 64   |
| IP100418471 | Vimentin                                                                                   | TYSLGSLRPSVTSR           | 29.21           | 2.048  | 525.9248489 | 3 | -0.00142   | -0.902  | 37   | 50   |
| IP100418471 | Vimentin                                                                                   | SVYTTSTR                 | 30.97           | 2.172  | 497.7161252 | 2 | -0.000201  | -0.202  | 29   | 36   |
| IP101015591 | cDNA FLJ55635, highly similar to pre-mRNA-splicing factorATP-dependent RNA hLRLDLDGDEYPSGK |                          | 86.37           | 2.884  | 522.9036251 | 2 | -0.000401  | -0.256  | 5    | 17   |
| IP101015591 | cDNA FLJ55635, highly similar to pre-mRNA-splicing factorATP-dependent RNA hLRLDLDGDEYPSGK |                          | 27.96           | 2.328  | 637.2706906 | 2 | -0.00207   | -1.63   | 7    | 17   |
| IP101015591 | cDNA FLJ55635, highly similar to pre-mRNA-splicing factorATP-dependent RNA hTEMQNTYPEILR   |                          | 30.97           | 2.139  | 648.363342  | 2 | -0.000668  | -0.513  | 481  | 493  |
| IP100031812 | Nuclease-sensitive element-binding protein 1                                               | NFNRYR                   | 1000            | 1.493  | 475.2057187 | 2 | -0.000814  | -0.858  | 284  | 289  |
| IP100031812 | Nuclease-sensitive element-binding protein 1                                               | NGVGFNR                  | 1000            | 1.629  | 510.7186886 | 2 | -0.000874  | -0.857  | 70   | 77   |
| IP100006025 | Isoform 1 of Squamous cell carcinoma antigen recognized by T-cells 3                       | GycYVEFK                 | 98.4            | 2.862  | 511.2111507 | 3 | -0.00029   | -0.189  | 747  | 757  |
| IP100006025 | Isoform 1 of Squamous cell carcinoma antigen recognized by T-cells 3                       | LYNIRAGFK                | 1000            | 0.8822 | 582.3195798 | 2 | 0.00101    | 0.866   | 832  | 841  |
| IP100006025 | Isoform 1 of Squamous cell carcinoma antigen recognized by T-cells 3                       | GycYVEFK                 | 116.83          | 1.951  | 573.2222287 | 2 | -0.00126   | -1.1    | 747  | 754  |
| IP100418313 | Interleukin enhancer-binding factor 3 isoform d                                            | NADHSNRYQYR              | 53.49           | 2.005  | 493.5222774 | 3 | -0.00114   | -0.774  | 888  | 898  |
| IP100376317 | Isoform 1 of Enhancer of mRNA-decapping protein 4                                          | SLAFHRPYPHLLQQR          | 171.52          | 2.63   | 648.3318477 | 3 | -0.000733  | -0.377  | 855  | 869  |
| IP100218435 | Isoform 2 of U4/U6 small nuclear ribonucleoprotein Prp4                                    | KPHIYQGSLEEK             | 77.86           | 4.414  | 515.2448726 | 3 | -0.000959  | -0.621  | 26   | 37   |
| IP100414676 | Heat shock protein HSP 90-beta                                                             | EDQTEYLEER               | 60.18           | 2.286  | 696.2720944 | 2 | -0.000563  | -0.404  | 187  | 196  |
| IP100414676 | Heat shock protein HSP 90-beta                                                             | VILHLKEDQTEYLEER         | 43.97           | 2.133  | 699.0091549 | 3 | 0.000288   | 0.137   | 181  | 196  |
| IP100414676 | Heat shock protein HSP 90-beta                                                             | EKYDQEELNK               | 1000            | 2.038  | 496.8919674 | 3 | -0.00227   | -1.53   | 274  | 284  |
| IP100414676 | Heat shock protein HSP 90-beta                                                             | VILHLKEDQTEYLEER         | 64.24           | 3.816  | 563.5334468 | 4 | -0.00231   | -1.03   | 181  | 197  |
| IP100414676 | Heat shock protein HSP 90-beta                                                             | EDQTEYLEER               | 47.48           | 2.147  | 516.551147  | 3 | -0.000235  | -0.152  | 187  | 197  |
| IP100414676 | Heat shock protein HSP 90-beta                                                             | DNSTMGYMAAK              | 26.2            | 1.514  | 664.7403561 | 2 | 0.000161   | 0.121   | 613  | 623  |
| IP100784295 | Isoform 1 of Heat shock protein HSP 90-alpha                                               | HlyVITGETK               | 27.96           | 2.65   | 435.535461  | 3 | -0.00219   | -1.68   | 490  | 499  |
| IP100784295 | Isoform 1 of Heat shock protein HSP 90-alpha                                               | DNSTMGYMAAK              | 56.2            | 2.072  | 634.7380978 | 2 | -0.000956  | -0.754  | 621  | 631  |
| IP100784295 | Isoform 1 of Heat shock protein HSP 90-alpha                                               | NPDITNEYGEYFK            | 84.46           | 1.958  | 957.3778073 | 2 | -0.000637  | -0.333  | 300  | 314  |
| IP100939523 | DEAD (Asp-Glu-Ala-Asp) box polypeptide 46, isoform CRA_a                                   | AGNKGAYFITTEDQAR         | 43.97           | 3.063  | 662.2982784 | 3 | -0.00154   | -0.777  | 713  | 729  |
| IP100939523 | DEAD (Asp-Glu-Ala-Asp) box polypeptide 46, isoform CRA_a                                   | LNYPVLEK                 | 1000            | 1.493  | 528.2628171 | 2 | -0.000117  | -0.111  | 909  | 919  |
| IP100939523 | DEAD (Asp-Glu-Ala-Asp) box polypeptide 46, isoform CRA_a                                   | LNYPVLEKQEER             | 1000            | 3.079  | 576.2728878 | 3 | -0.00241   | -1.4    | 909  | 921  |
| IP101013815 | cDNA FLJ54736, highly similar to Scaffold attachment factor B                              | cYGFVTMSTAEATK           | 195.43          | 3.172  | 887.8572995 | 2 | -0.000218  | -0.123  | 198  | 212  |
| IP101013815 | cDNA FLJ54736, highly similar to Scaffold attachment factor B                              | DDAYWPEAK                | 1000            | 2.808  | 587.7263791 | 2 | -0.000993  | -0.846  | 469  | 477  |
| IP100013830 | SNW domain-containing protein 1                                                            | LAELYLADRK               | 1000            | 2.891  | 671.8422848 | 2 | -0.000582  | -0.433  | 287  | 297  |
| IP100013830 | SNW domain-containing protein 1                                                            | AADKLAPAQYR              | 1000            | 1.984  | 466.23764   | 3 | -0.00186   | -1.33   | 167  | 178  |
| IP100013830 | SNW domain-containing protein 1                                                            | DKVLYSK                  | 24.95           | 1.917  | 466.7283932 | 2 | -0.000565  | -0.606  | 109  | 115  |
| IP100013830 | SNW domain-containing protein 1                                                            | LAPAQYR                  | 1000            | 1.876  | 506.2554013 | 2 | 0.000051   | 0.0505  | 171  | 178  |
| IP100782992 | Isoform 1 of Serine/arginine repetitive matrix protein 2                                   | VPLSAEYR                 | 24.95           | 1.461  | 507.7366635 | 2 | -0.000625  | -0.616  | 2385 | 2392 |
| IP100782992 | Isoform 1 of Serine/arginine repetitive matrix protein 2                                   | SLSYSPVER                | 30.97           | 1.515  | 559.2504269 | 2 | 0.0002032  | 0.00207 | 2690 | 2698 |
| IP100304925 | Heat shock 70 kDa protein 1A/1B                                                            | TPPYVAFTDTER             | 0               | 1.93   | 784.3363034 | 2 | -0.00344   | -2.2    | 37   | 49   |
| IP100304925 | Heat shock 70 kDa protein 1A/1B                                                            | VQVSYKGETK               | 21.95           | 1.292  | 406.864334  | 3 | -0.00258   | -2.11   | 103  | 112  |
| IP100304925 | Heat shock 70 kDa protein 1A/1B                                                            | MVQEAEKYKAEDVQR          | 1000            | 1.907  | 678.3060299 | 3 | -0.00279   | -1.37   | 518  | 535  |
| IP100014344 | Isoform Long of Dual specificity tyrosine-phosphorylation-regulated kinase 1A              | TYQIQSR                  | 61.75           | 2.444  | 575.7683102 | 2 | -0.00103   | -0.896  | 318  | 323  |
| IP100644386 | Uncharacterized protein                                                                    | AWEEYK                   | 27.96           | 1.364  | 598.7549435 | 2 | -0.000864  | -0.723  | 585  | 592  |
| IP100644386 | Uncharacterized protein                                                                    | AWEEYK                   | 30.97           | 1.562  | 534.7077634 | 2 | -0.000225  | -0.21   | 585  | 591  |
| IP100798302 | cDNA FLJ59405, highly similar to Eukaryotic translation initiation factor 4B               | ARPATDSFDDYPPR           | 232.48          | 3.646  | 563.2421871 | 3 | -0.00102   | -0.602  | 162  | 175  |
| IP100798302 | cDNA FLJ59405, highly similar to Eukaryotic translation initiation factor 4B               | DYDRGYDSR                | 21.27           | 1.815  | 409.4872432 | 3 | -0.00195   | -1.59   | 226  | 234  |
| IP100798302 | cDNA FLJ59405, highly similar to Eukaryotic translation initiation factor 4B               | ARPATDSFDDYPPRR          | 118.47          | 1.787  | 615.2744747 | 3 | -0.000525  | -2.85   | 162  | 176  |
| IP100889791 | cDNA FLJ13224 fs, clone KIDNE2004305, highly similar to ATP-dependent DNA IELVYPPDYPEGK    | KQGYENLCLLR              | 47.48           | 1.384  | 800.8506467 | 2 | -0.000358  | -0.224  | 486  | 498  |
| IP100922484 | cDNA, FLJ79376, highly similar to Protein G10 homolog                                      | KQGYENLCLLR              | 1000            | 2.854  | 507.5514827 | 3 | -0.000459  | -0.302  | 104  | 104  |
| IP100922484 | cDNA, FLJ79376, highly similar to Protein G10 homolog                                      | QGYENLCLLR               | 1000            | 3.879  | 696.7752682 | 2 | -0.00155   | -1.11   | 95   | 104  |
| IP100955965 | Isoform 2 of Ubiquitin carboxyl-terminal hydrolase 10                                      | KRPPGYSYLK               | 0               | 1.352  | 527.2730709 | 3 | -0.000364  | -0.23   | 201  | 212  |
| IP100955965 | Isoform 2 of Ubiquitin carboxyl-terminal hydrolase 10                                      | KRPPGYSYLK               | 70.57           | 4.262  | 484.5745235 | 3 | -0.00101   | -0.693  | 202  | 212  |
| IP100955965 | Isoform 2 of Ubiquitin carboxyl-terminal hydrolase 10                                      | KRPPGYSYLK               | 18.95, 21.95    | 2.548  | 553.9281612 | 3 | -0.00142   | -0.858  | 201  | 212  |
| IP100955965 | Isoform 2 of Ubiquitin carboxyl-terminal hydrolase 10                                      | RPPGYSYLK                | 0               | 2.999  | 662.3104855 | 2 | -0.000078  | -0.59   | 203  | 212  |
| IP100955965 | Isoform 2 of Ubiquitin carboxyl-terminal hydrolase 10                                      | RPPGYSYLK                | 0.00, 0.00      | 1.219  | 702.2935178 | 2 | -0.00105   | -0.746  | 203  | 212  |
| IP100955965 | Isoform 2 of Ubiquitin carboxyl-terminal hydrolase 10                                      | KRPPGYSYLK               | 18.95, 0.00     | 2.522  | 511.2297359 | 3 | -0.00117   | -1.11   | 202  | 212  |
| IP100290204 | Isoform 1 of U1 small nuclear ribonucleoprotein 70 kDa                                     | GyAFIEYPIR               | 172.42          | 2.337  | 498.541473  | 3 | -0.00146   | -0.976  | 145  | 155  |
| IP100290204 | Isoform 1 of U1 small nuclear ribonucleoprotein 70 kDa                                     | EFEVYGIPIR               | 1000            | 1.719  | 439.8796993 | 3 | -0.00108   | -0.819  | 122  | 131  |
| IP100290204 | Isoform 1 of U1 small nuclear ribonucleoprotein 70 kDa                                     | HNQPYCGIAPYR             | 223.91          | 3.21   | 602.603149  | 3 | -0.000995  | -0.551  | 33   | 46   |
| IP100183500 | Isoform 1 of Nuclear cap-binding protein subunit 2                                         | SDSYVELSQYR              | 30.97           | 3.156  | 713.7980954 | 2 | -0.000761  | -0.533  | 11   | 21   |
| IP100477686 | General transcription factor IIF subunit 2                                                 | HQVNLK                   | 52.4            | 2.409  | 523.2289426 | 2 | -0.000766  | -0.733  | 194  | 200  |
| IP100477686 | General transcription factor IIF subunit 2                                                 | AESPAASENVMR             | 96.95           | 3.693  | 545.5532222 | 3 | -0.00158   | -0.964  | 114  | 126  |
| IP100003865 | Isoform 1 of Heat shock cognate 71 kDa protein                                             | EIAEAYLKG                | 1000            | 0.7792 | 537.2492062 | 2 | -0.00154   | -1.43   | 129  | 137  |
| IP100396378 | Isoform B1 of Heterogeneous nuclear ribonucleoproteins A2/B1                               | YHTINGHNAEVR             | 39.54           | 2.482  | 497.5558773 | 3 | -0.00214   | -1.44   | 174  | 185  |
| IP100396378 | Isoform B1 of Heterogeneous nuclear ribonucleoproteins A2/B1                               | NyEYQWKG                 | 58.42           | 1.762  | 584.2290646 | 3 | -0.000922  | -0.79   | 39   | 46   |
| IP100396378 | Isoform B1 of Heterogeneous nuclear ribonucleoproteins A2/B1                               | MGGGPGYGGNYGPGSGGGSGYVGR | 17.99           | 3.715  | 757.295898  | 3 | -0.000583  | -0.257  | 326  | 350  |
| IP100397358 | Ribosomal protein S27                                                                      | LVQSPNYSFMDVK            | 27.96           | 2.799  | 804.3627316 | 2 | -0.000488  | -0.304  | 88   | 100  |
| IP100397358 | Ribosomal protein S27                                                                      | LVQSPNYSFMDVK            | 30.97, 1,000.00 | 3.166  | 812.3594357 | 2 | -0.002     | -1.23   | 88   | 100  |
| IP100397358 | Ribosomal protein S27                                                                      | RLVQSPNYSFMDVK           | 27.96           | 3.597  | 588.6107174 | 3 | -0.0027    |         |      |      |

|             |                                                                                              |                      |                    |        |             |   |            |          |      |      |
|-------------|----------------------------------------------------------------------------------------------|----------------------|--------------------|--------|-------------|---|------------|----------|------|------|
| IP100007928 | Pre-mRNA-processing-splicing factor 8                                                        | TNHVVSDDIK           | 104.79             | 1.838  | 736.3274533 | 2 | -0.000449  | -0.0305  | 2087 | 2098 |
| IP100007928 | Pre-mRNA-processing-splicing factor 8                                                        | ETGYTYLTK            | 30.97              | 2.374  | 632.7972409 | 2 | -0.00017   | -0.134   | 2099 | 2108 |
| IP100007928 | Pre-mRNA-processing-splicing factor 8                                                        | ANPalyVLR            | 1000               | 2.017  | 548.7821042 | 2 | 0.000757   | 0.69     | 1736 | 1744 |
| IP100908896 | Uncharacterized protein                                                                      | DLNlyrSGMSDRH        | 138.94             | 3.275  | 561.2095943 | 3 | -0.000999  | -0.57    | 263  | 275  |
| IP100939124 | Uncharacterized protein                                                                      | IFVGGKEDTEEYVLR      | 60.5               | 2.108  | 654.9785152 | 3 | -0.00173   | -0.882   | 128  | 143  |
| IP100643041 | GTP-binding nuclear protein Ran                                                              | NLQYDLSAK            | 27.96              | 1.789  | 647.7894284 | 2 | -0.00109   | -0.846   | 143  | 152  |
| IP100909378 | cDNA FLJ59219, highly similar to Poly(A)-binding protein 1                                   | IVATKPLyVALAQR       | 133.51             | 4.458  | 541.6392208 | 3 | -0.00161   | -0.995   | 325  | 338  |
| IP100909378 | cDNA FLJ59219, highly similar to Poly(A)-binding protein 1                                   | QAHLTNQyMQR          | 64.24              | 2.052  | 490.55014   | 3 | -0.00136   | -0.923   | 343  | 353  |
| IP100909378 | cDNA FLJ59219, highly similar to Poly(A)-binding protein 1                                   | QlyVGR               | 1000               | 1.479  | 408.1945798 | 2 | -0.000392  | -0.481   | 228  | 233  |
| IP100909378 | cDNA FLJ59219, highly similar to Poly(A)-binding protein 1                                   | TVPQyK               | 105.44             | 1.094  | 408.1884457 | 2 | -0.00146   | -1.79    | 475  | 480  |
| IP100790636 | HLA-B associated transcript 1                                                                | GSyVSHSSGFR          | 42.13              | 2.663  | 459.538055  | 3 | -0.00141   | -1.03    | 37   | 48   |
| IP100790636 | HLA-B associated transcript 1                                                                | LTLHGLQQyVVK         | 24.95              | 2.648  | 514.9293819 | 3 | 0.000169   | 0.11     | 257  | 268  |
| IP100395337 | isoform 1 of Pre-mRNA 3'-end-processing factor FIP1                                          | QWdyYAR              | 27.96              | 1.673  | 541.2107541 | 2 | -0.000743  | -0.687   | 450  | 456  |
| IP100029081 | Isoform Alpha of DNA ligase 3                                                                | VNKlyrPDFVDPK        | 27.96              | 2.563  | 629.9823604 | 3 | 0.0014     | 0.744    | 763  | 777  |
| IP100023343 | Isoform 1 of Disks large homolog 3                                                           | RDEVDGQyHPVVR        | 182.72             | 4.389  | 672.6254879 | 3 | -0.000513  | -0.254   | 664  | 679  |
| IP100472724 | Putative elongation factor 1-alpha-like 3                                                    | STTTGHLyK            | 167.93             | 2.074  | 400.8602291 | 3 | -0.00169   | -1.41    | 21   | 30   |
| IP100472724 | Putative elongation factor 1-alpha-like 3                                                    | FETSKyVTTIDAPGHR     | 16.25              | 3.912  | 692.9980465 | 3 | -0.00124   | -0.596   | 80   | 96   |
| IP100472724 | Putative elongation factor 1-alpha-like 3                                                    | EHALlAyTLGVK         | 27.96              | 2.655  | 465.5740963 | 3 | -0.00199   | -1.43    | 135  | 146  |
| IP100916818 | Phosphoglycerate kinase                                                                      | ELNyFAK              | 1000               | 1.841  | 482.7126767 | 2 | -0.000598  | -0.62    | 103  | 109  |
| IP100916818 | Phosphoglycerate kinase                                                                      | KELNyFAK             | 1000               | 2.73   | 546.7601315 | 2 | -0.000689  | -0.63    | 102  | 109  |
| IP100220918 | Isoform 2 of DNA (cytosine-5)-methyltransferase 1                                            | KYSDyK               | 107.96             | 2.362  | 498.7252687 | 2 | -0.000714  | -0.717   | 991  | 997  |
| IP100220918 | Isoform 2 of DNA (cytosine-5)-methyltransferase 1                                            | KEPVEDLyPEHYR        | 130.6              | 5.01   | 623.9403072 | 3 | -0.000955  | -0.511   | 977  | 990  |
| IP100220918 | Isoform 2 of DNA (cytosine-5)-methyltransferase 1                                            | YSDyK                | 32.22              | 1.504  | 434.6784054 | 2 | -0.000441  | -0.507   | 992  | 997  |
| IP100021417 | U4/U5/U6 tri-snRNP-associated protein 1                                                      | TPyVLSGSGK           | 50.64              | 1.907  | 601.297424  | 2 | -0.000104  | -0.0862  | 781  | 791  |
| IP100021634 | Kinesin light chain 2                                                                        | AEEVeyYR             | 21.95              | 2.768  | 486.5416866 | 3 | -0.000717  | -0.492   | 340  | 349  |
| IP100021634 | Kinesin light chain 2                                                                        | AEEVeyYR             | 30.97              | 2.664  | 651.2579343 | 2 | -0.000983  | -0.755   | 340  | 348  |
| IP100453473 | Histone H4                                                                                   | ISGLyEETR            | 70.88              | 3.405  | 630.7972409 | 2 | -0.00117   | -0.928   | 47   | 56   |
| IP100784090 | T-complex protein 1 subunit theta                                                            | HFSGLEEAyVr          | 201.33             | 3.447  | 463.2059932 | 3 | -0.0024    | -1.73    | 21   | 31   |
| IP100015838 | Cell growth-regulating nuclear protein                                                       | VLAQyTVTDEHR         | 46.67              | 2.863  | 453.7085567 | 4 | -0.00107   | -0.593   | 336  | 349  |
| IP101008793 | RNA-binding protein 10 isoform 5                                                             | ESATADAGyALEKK       | 134.61             | 2.979  | 549.5939327 | 3 | -0.00188   | -1.14    | 751  | 765  |
| IP101008793 | RNA-binding protein 10 isoform 5                                                             | ESATADAGyALEK        | 112.7              | 1.255  | 759.8401486 | 2 | -0.000554  | -0.365   | 751  | 764  |
| IP100028122 | Isoform 1 of PC4 and SFRS1-interacting protein                                               | MKGyYHWPAR           | 1000               | 1.805  | 441.5342403 | 3 | 0.0000443  | 0.0335   | 15   | 24   |
| IP100793920 | CDV3 homolog (Mouse), isoform CRA_a                                                          | EVdySGLR             | 30.97              | 1.675  | 509.7162167 | 2 | -0.000118  | -0.116   | 92   | 98   |
| IP100793920 | CDV3 homolog (Mouse), isoform CRA_a                                                          | LQLDNQyAVLENQK       | 1000               | 2.829  | 585.9488521 | 3 | -0.00112   | -0.638   | 238  | 251  |
| IP100183626 | polypyrimidine tract-binding protein 1 isoform a                                             | GQPyIQyFSNHK         | 89.54              | 2.279  | 756.3554074 | 2 | -0.00194   | -1.28    | 123  | 134  |
| IP100008530 | 60S acidic ribosomal protein P0                                                              | IIQLLDyPK            | 1000               | 3.081  | 649.3264157 | 2 | 0.000018   | 0.139    | 17   | 26   |
| IP100018140 | Isoform 1 of Heterogeneous nuclear ribonucleoprotein Q                                       | KLKDYAFHFDER         | 1000               | 2.787  | 441.2145991 | 4 | -0.00181   | -1.02    | 369  | 381  |
| IP100018140 | Isoform 1 of Heterogeneous nuclear ribonucleoprotein Q                                       | LKDyAFHFDER          | 1000               | 3.623  | 545.2515255 | 3 | -0.0028    | -1.71    | 370  | 381  |
| IP100420014 | Isoform 1 of US small nuclear ribonucleoprotein 200 kDa helicase                             | MTQNPNyMLQGISHR      | 74.96              | 3.22   | 672.630981  | 3 | -0.00263   | -1.31    | 1764 | 1779 |
| IP100420014 | Isoform 1 of US small nuclear ribonucleoprotein 200 kDa helicase                             | mTQNPNyMLQGISHR      | 1,000.00, 81.61    | 4.04   | 677.9635006 | 3 | -0.000101  | 0.00496  | 1764 | 1779 |
| IP100373877 | Isoform 1 of Zinc finger protein 326                                                         | NSEKYGdYr            | 83.65              | 1.75   | 423.5025325 | 3 | -0.00298   | -2.35    | 300  | 309  |
| IP100405914 | Hsx2-interacting protein                                                                     | VLPySNIVr            | 30.97              | 1.591  | 621.3184201 | 2 | -0.000511  | -0.412   | 1294 | 1303 |
| IP100219420 | Structural maintenance of chromosomes protein 3                                              | QKSEKFMPPK           | 1,000.00, 1,000.00 | 1.193  | 461.8563533 | 3 | 0.0112     | 8.06     | 747  | 756  |
| IP100219420 | Structural maintenance of chromosomes protein 3                                              | LHTLEEKEEAQyKQK      | 196.55             | 3.351  | 689.9926754 | 3 | -0.00185   | -0.895   | 200  | 215  |
| IP100219420 | Structural maintenance of chromosomes protein 3                                              | GALTTGGyYDR          | 27.96              | 2.731  | 627.2638547 | 2 | -0.000642  | -0.512   | 662  | 672  |
| IP100219420 | Structural maintenance of chromosomes protein 3                                              | RALEYLYNQELNETR      | 24.95              | 3.614  | 698.3280635 | 3 | -0.00199   | -0.949   | 221  | 236  |
| IP100479209 | cDNA FLJ54590, highly similar to KH domain-containing, RNA-binding, signalranEHPyGRY         |                      | 21.44              | 0.7845 | 501.1979977 | 2 | -0.000561  | -0.056   | 417  | 423  |
| IP100479209 | cDNA FLJ54590, highly similar to KH domain-containing, RNA-binding, signalranGAYRHPyGRY      |                      | 116.16             | 1.721  | 483.5419918 | 3 | -0.000901  | -0.622   | 413  | 423  |
| IP100479209 | cDNA FLJ54590, highly similar to KH domain-containing, RNA-binding, signalranKDEENyLDLFSHK   |                      | 226.5              | 3.511  | 611.5963741 | 3 | -0.00115   | -0.63    | 119  | 132  |
| IP100220740 | Isoform 2 of Nucleophosmin                                                                   | ADKDYHFKNVDENEHQLSLR | 264.57             | 3.713  | 664.0472407 | 4 | -0.00314   | -1.18    | 25   | 45   |
| IP100917575 | cDNA FLJ51046, highly similar to 60 kDa heat shock protein, mitochondrial                    | CEFDQyVLSLEK         | 136.26             | 3.041  | 603.9429317 | 3 | -0.000447  | -0.247   | 181  | 194  |
| IP100917575 | cDNA FLJ51046, highly similar to 60 kDa heat shock protein, mitochondrial                    | GyISPyFTNSK          | 59.15              | 2.234  | 735.3402707 | 2 | 0.00089    | 0.605    | 166  | 177  |
| IP100797230 | 32 kDa protein                                                                               | ASGNyATVISHNPETK     | 54.52              | 3.085  | 590.2683712 | 3 | -0.00126   | -0.714   | 129  | 144  |
| IP100007941 | Protein HEXIM1                                                                               | HWKPyYK              | 23.19              | 1.942  | 551.2496335 | 2 | -0.000885  | -0.803   | 163  | 169  |
| IP101014975 | Talin 1                                                                                      | ALDyYMLR             | 48.87              | 2.663  | 562.7465207 | 2 | -0.0005102 | -0.00906 | 67   | 74   |
| IP101014975 | Talin 1                                                                                      | ALDyYMLR             | 26.20, 1,000.00    | 1.77   | 570.7439572 | 2 | -0.000121  | -0.0457  | 67   | 74   |
| IP100908791 | Uncharacterized protein                                                                      | DQLyNLK              | 1000               | 1.768  | 600.3084103 | 2 | 0.00107    | 0.891    | 6    | 14   |
| IP100908791 | Uncharacterized protein                                                                      | QVVESyEVIK           | 50.64              | 3.282  | 672.8258664 | 2 | -0.00132   | -0.981   | 207  | 217  |
| IP100641212 | cDNA FLJ54733, highly similar to General transcription initiation factor 3C polypeptide 5    | LDAPVdyFRPETYQHR     | 37.97              | 2.838  | 696.3175045 | 3 | -0.00206   | -0.989   | 51   | 66   |
| IP100922360 | cDNA FLJ54488, highly similar to Eukaryotic translation initiation factor 3 subunitKNEGyMR   |                      | 1000               | 2.032  | 489.199371  | 2 | -0.00071   | -0.726   | 773  | 779  |
| IP100922360 | cDNA FLJ54488, highly similar to Eukaryotic translation initiation factor 3 subunitIQTYGyYFR |                      | 30.97              | 1.367  | 564.7293698 | 2 | -0.000712  | -0.631   | 757  | 765  |
| IP100026215 | Flap endonuclease 1                                                                          | RLDPNkyVPVENLHK      | 1000               | 3.604  | 522.2632286 | 4 | -0.00189   | -0.905   | 262  | 277  |
| IP100894287 | cDNA FLJ56889, moderately similar to Vigilin                                                 | MDyVEINIDHK          | 1000               | 2.43   | 486.2106624 | 3 | -0.00219   | -1.5     | 402  | 412  |
| IP100894287 | cDNA FLJ56889, moderately similar to Vigilin                                                 | mDyVEINIDHK          | 1,000.00, 1,000.00 | 2.102  | 493.5426021 | 3 | -0.00129   | -0.873   | 402  | 412  |
| IP100181728 | Ribosome biogenesis protein BRX1 homolog                                                     | KQDyMLWSLNSPHGSPAK   | 192.61             | 3.33   | 713.6619869 | 3 | -0.00332   | -1.55    | 123  | 140  |
| IP100181728 | Ribosome biogenesis protein BRX1 homolog                                                     | KKQDyMLWSLNSPHGSPAK  | 181.64             | 4.567  | 567.5222774 | 4 | -0.00299   | -1.32    | 122  | 140  |
| IP100854834 | echinoderm microtubule-associated protein-like 4 isoform b                                   | TADKHKDyVINQGEyK     | 176.58             | 2.471  | 546.0203853 | 4 | -0.00156   | -0.715   | 153  | 170  |
| IP100854834 | echinoderm microtubule-associated protein-like 4 isoform b                                   | DyVINQGEyK           | 1000               | 3.287  | 750.8530881 | 2 | -0.000575  | -0.383   | 159  | 170  |
| IP100854834 | echinoderm microtubule-associated protein-like 4 isoform b                                   | HKDyVINQGEyK         | 1000               | 2.821  | 589.2894893 | 3 | -0.000086  | -0.00487 | 157  | 170  |
| IP100019046 | Isoform 1 of Pre-mRNA-splicing factor RBM22                                                  | SDWkEYyTQWNER        | 54.16              | 2.459  | 619.589355  | 3 | -0.002111  | -0.114   | 110  | 123  |
| IP100334587 | Isoform 2 of Heterogeneous nuclear ribonucleoprotein A/B                                     | RGGHQMyKPY           | 49.77              | 1.62   | 471.8724666 | 3 | -0.00478   | -3.38    | 322  | 332  |
| IP100303402 | Phosphorylated adapter RNA export protein                                                    | AFQNTATACAPySHyR     | 20.2               | 3.142  | 625.2738033 | 3 | 0.000168   | 0.0897   | 43   | 58   |
| IP100017617 | Probable ATP-dependent RNA helicase DDX5                                                     | STCyGGAAPK           | 122.33             | 2.008  | 567.2382199 | 2 | -0.00178   | -1.57    | 198  | 207  |
| IP100017617 | Probable ATP-dependent RNA helicase DDX5                                                     | GySLLK               | 61.94              | 1.108  | 424.2015683 | 2 | -0.00141   | -1.67    | 517  | 523  |
| IP100307733 | Isoform 1 of Histone-lysine N-methyltransferase SETD2                                        | IYyYHVITR            | 60.18              | 2.095  | 436.5442196 | 3 | -0.00192   | -1.47    | 2405 | 2413 |
| IP100307733 | Isoform 1 of Histone-lysine N-methyltransferase SETD2                                        | NHyYFMALK            | 24.95              | 1.162  | 460.5447078 | 3 | -0.00385   | -2.79    | 1601 | 1610 |
| IP100790342 | 60S ribosomal protein L6                                                                     | SyVFALTYGHPK         | 114.24             | 3.697  | 509.5853721 | 3 | -0.000505  | -0.331   | 274  | 286  |
| IP100031801 | Isoform 1 of DNA-binding protein A                                                           | RPyNYr               | 48.15              | 1.589  | 474.7081601 | 2 | -0.000731  | -0.771   | 331  | 336  |
| IP100186290 | Elongation factor 2                                                                          | KEDyLkPIQR           | 1000               | 3.866  | 494.9289547 | 3 | -0.00121   | -0.818   | 439  | 449  |
| IP100186290 | Elongation factor 2                                                                          | EDLyLkPIQR           | 1000               | 2.868  | 452.2305599 | 3 | -0.00114   | -1.03    | 440  | 449  |
| IP100465248 | Isoform alpha-enolase of Alpha-enolase                                                       | IGAeVyhNLK           | 1000               | 2.682  | 408.5324998 | 3 | -0.000957  | -0.782   | 184  | 193  |
| IP100302302 | Isoform 2 of Homeodomain-interacting protein kinase 1                                        | AVcStyLQSR           | 30.97              | 2.144  | 632.7738034 | 2 | 0.0008899  | 0.0711   | 347  | 356  |
| IP100294794 | RRP12-like protein isoform 2                                                                 | GRPDyYAPyLNR         | 138.72             | 2.744  | 537.927856  | 3 | -0.000709  | -0.44    | 1185 | 1197 |
| IP100010204 | Serine/arginine-rich splicing factor 3                                                       | AFyYGLPR             | 58.42              | 2.487  | 562.2528073 | 2 | -0.000369  | -0.0329  | 29   | 37   |
| IP100925601 | Uncharacterized protein                                                                      | VVAcNyPPVK           | 1000               | 2.102  | 695.3364255 | 2 | 0.000834   | 0.6      | 97   | 107  |
| IP100925601 | Uncharacterized protein                                                                      | AnyWWLR              | 1000               | 1.778  | 544.7399289 | 2 | 0.000206   | 0.189    | 461  | 467  |
| IP100925601 | Uncharacterized protein                                                                      | LAGDKAnyWWLR         | 1000               | 2.677  | 524.9172969 | 3 | -0.000286  | -0.182   | 456  | 467  |
| IP100219875 | Isoform 2ABC of Catenin delta-1                                                              | LNGPQDySHLLySTPR     |                    |        |             |   |            |          |      |      |

|             |                                                                                                    |                      |        |       |             |   |            |          |      |      |
|-------------|----------------------------------------------------------------------------------------------------|----------------------|--------|-------|-------------|---|------------|----------|------|------|
| IP10006482  | Isoform Long of Sodium/potassium-transporting ATPase subunit alpha-1                               | GIWYTGDR             | 30.97  | 2.421 | 530.247009  | 2 | -0.00153   | -1.45    | 256  | 264  |
| IP100237671 | Neurofilament light polypeptide                                                                    | SAYSYSAVSSLSLVR      | 29.21  | 2.509 | 914.4122311 | 2 | 0.000311   | 0.17     | 38   | 54   |
| IP100219929 | Isoform 2 of Protein max                                                                           | ATEYIQMR             | 124.16 | 2.355 | 627.7651364 | 2 | -0.000579  | -0.461   | 58   | 66   |
| IP101011344 | 37 kDa protein                                                                                     | IWHHTFYNELR          | 84.46  | 3.49  | 532.5769649 | 3 | -0.000782  | -0.49    | 85   | 95   |
| IP101011344 | 37 kDa protein                                                                                     | DSYVGDEAQS           | 58.42  | 2.432 | 639.7481686 | 2 | -0.000714  | -0.559   | 51   | 61   |
| IP101011344 | 37 kDa protein                                                                                     | DSYVGDEAQS           | 74.96  | 3.421 | 478.8681026 | 3 | -0.00167   | -1.16    | 51   | 62   |
| IP100644488 | guanylate kinase isoform a                                                                         | NRRPGEGKDYVYFTR      | 40.66  | 3.332 | 531.240478  | 4 | -0.00119   | -0.561   | 63   | 79   |
| IP100923436 | Isoform 4 of Nuclear receptor corepressor 2                                                        | NYFFNYK              | 112.12 | 1.63  | 538.2180783 | 2 | -0.000595  | -0.553   | 651  | 657  |
| IP100418169 | Isoform 2 of Annexin A2                                                                            | AYTFNDAER            | 67.96  | 2.281 | 583.7293088 | 2 | -0.00113   | -0.972   | 47   | 55   |
| IP100418169 | Isoform 2 of Annexin A2                                                                            | LSLEGDHSTPPSAGYVK    | 24.95  | 4.219 | 642.2946773 | 3 | -0.00114   | -0.595   | 29   | 46   |
| IP100418169 | Isoform 2 of Annexin A2                                                                            | SLYYIQDQTK           | 61.94  | 2.814 | 751.3344723 | 2 | -0.000607  | -0.404   | 332  | 342  |
| IP100807491 | Isoform 2 of General transcription factor 3C polypeptide 1                                         | GYSYSPGVSTR          | 67.96  | 2.593 | 640.2899167 | 2 | -0.000418  | -0.327   | 1650 | 1660 |
| IP100024320 | Putative RNA-binding protein 3                                                                     | YDSDRPGYGYGYGR       | 26.2   | 2.256 | 604.2459102 | 3 | -0.000646  | -0.357   | 117  | 131  |
| IP100060715 | BTB/POZ domain-containing protein KCTD12                                                           | EAEYFELPELVR         | 1000   | 1.819 | 787.861694  | 2 | 0.00114    | 0.722    | 116  | 127  |
| IP100060715 | BTB/POZ domain-containing protein KCTD12                                                           | EAEYFELPELVR         | 1000   | 2.036 | 577.6104732 | 3 | 0.000243   | 0.14     | 116  | 128  |
| IP100853115 | NEFM protein                                                                                       | SAKEEIAEYR           | 176.23 | 1.522 | 638.2846677 | 2 | -0.000716  | -0.562   | 312  | 321  |
| IP100853115 | NEFM protein                                                                                       | SAKEEIAEYR           | 189.14 | 2.228 | 477.8924862 | 3 | -0.00152   | -1.06    | 312  | 322  |
| IP100853115 | NEFM protein                                                                                       | VHYLEQQNK            | 1000   | 1.861 | 413.5239864 | 2 | -0.000817  | -0.66    | 119  | 127  |
| IP100853115 | NEFM protein                                                                                       | FAGYIEK              | 1000   | 1.72  | 454.2017514 | 2 | -0.00105   | -1.16    | 112  | 118  |
| IP100719106 | Isoform 2 of Cleavage end polyadenylation specificity factor subunit 7                             | DLLHNEHDDYFQER       | 1000   | 2.32  | 446.2307124 | 4 | 0.0000481  | 0.022    | 431  | 446  |
| IP100376215 | Isoform 2 of DNA-dependent protein kinase catalytic subunit                                        | NWYPR                | 1000   | 1.277 | 408.1654355 | 2 | -0.00108   | -1.33    | 4006 | 4010 |
| IP100376215 | Isoform 2 of DNA-dependent protein kinase catalytic subunit                                        | SyVAVWR              | 26.2   | 1.78  | 488.7001645 | 2 | -0.000423  | -0.433   | 882  | 888  |
| IP100247583 | 60S ribosomal protein L21                                                                          | HGVVPLATYMR          | 0      | 2.507 | 662.316467  | 2 | -0.00342   | -2.58    | 22   | 32   |
| IP100908463 | cDNA FLJ34451, highly similar to Stress-induced-phosphoprotein 1                                   | LAVINPLALEEK         | 1000   | 3.122 | 784.8849484 | 2 | 0.000545   | 0.348    | 328  | 340  |
| IP100908463 | cDNA FLJ34451, highly similar to Stress-induced-phosphoprotein 1                                   | KAAALEAMKDYTK        | 23.2   | 3.179 | 507.2458492 | 3 | -0.00143   | -0.94    | 410  | 422  |
| IP100908463 | cDNA FLJ34451, highly similar to Stress-induced-phosphoprotein 1                                   | AAALEAMKDYTK         | 23.2   | 2.721 | 464.5476375 | 3 | -0.00106   | -0.765   | 411  | 422  |
| IP100328987 | Bystin                                                                                             | GTGEAEYVGR           | 151.06 | 2.432 | 737.2988278 | 2 | -0.000196  | -0.133   | 41   | 53   |
| IP100166845 | Isoform 3 of Tyrosine-protein kinase Fyn                                                           | GAYSLSIR             | 58.42  | 2.298 | 473.723663  | 2 | -0.000426  | -0.45    | 183  | 190  |
| IP100166845 | Isoform 3 of Tyrosine-protein kinase Fyn                                                           | LIEDNEYTR            | 23.98  | 2.256 | 652.2821652 | 2 | -0.000721  | -0.553   | 359  | 368  |
| IP100221141 | Isoform CSBP1 of Mitogen-activated protein kinase 14                                               | HTDEMTGYVATR         | 66.42  | 3.263 | 525.8768306 | 3 | -0.000385  | -0.244   | 174  | 186  |
| IP101011924 | 117 kDa protein                                                                                    | KLYVQLK              | 53.98  | 2.324 | 582.2968747 | 2 | -0.000802  | -0.689   | 776  | 783  |
| IP100413365 | Isoform 1 of Zinc finger protein 318                                                               | MyTLR                | 61.94  | 1.831 | 413.1719052 | 2 | -0.00104   | -1.26    | 909  | 913  |
| IP100798211 | Uncharacterized protein                                                                            | LGEYEDVSR            | 122.33 | 2.561 | 574.2376095 | 2 | 0.0000676  | 0.0589   | 95   | 103  |
| IP100644618 | Isoform 4 of Myelin protein zero-like protein 1                                                    | SESVYADIR            | 105.08 | 2.591 | 609.7743527 | 2 | 0.000154   | 0.126    | 134  | 143  |
| IP100022353 | Non-receptor tyrosine-protein kinase TYK2                                                          | LLAQAEYEPYR          | 1000   | 2.256 | 800.3663327 | 2 | 0.000449   | 0.28     | 282  | 294  |
| IP100015912 | Protein FAM50B                                                                                     | FSAHYDAVEALK         | 50.19  | 2.932 | 780.3424679 | 2 | -0.00122   | -0.779   | 49   | 61   |
| IP100300060 | WD repeat-containing protein 70                                                                    | AAEDSPYVWSPYVK       | 60.18  | 2.288 | 875.8717648 | 2 | -0.000822  | -0.469   | 612  | 626  |
| IP100297211 | SWI/SNF-related matrix-associated actin-dependent regulator of chromatin subfamily Q-like member 1 | QNLQSLVGR            | 98.4   | 2.666 | 622.7874142 | 2 | -0.000723  | -0.581   | 133  | 142  |
| IP100940851 | ELAV-like protein 1                                                                                | NVALLSQLYHSPAR       | 43.97  | 2.885 | 550.2788692 | 3 | -0.000269  | -0.163   | 192  | 205  |
| IP100013917 | 40S ribosomal protein S12                                                                          | DVIEFYK              | 1000   | 1.982 | 561.7415768 | 2 | -0.000798  | -0.711   | 122  | 129  |
| IP100464978 | Insulin receptor substrate 2 insertion mutant (Fragment)                                           | SDDYMPSPASVSAPK      | 26.99  | 2.055 | 881.8572995 | 2 | -0.000253  | -0.143   | 674  | 689  |
| IP100464978 | Insulin receptor substrate 2 insertion mutant (Fragment)                                           | APYTCGGDSQYVHNSPVGVR | 49.77  | 2.449 | 780.6599117 | 3 | -0.00391   | -1.67    | 814  | 834  |
| IP100464978 | Insulin receptor substrate 2 insertion mutant (Fragment)                                           | LYEYSEKK             | 58.42  | 1.581 | 634.7759396 | 2 | -0.00117   | -0.924   | 75   | 83   |
| IP100985363 | Conserved hypothetical protein                                                                     | IvYLYTK              | 86.89  | 2.003 | 490.2490536 | 2 | -0.000344  | -0.351   | 30   | 36   |
| IP100909544 | cDNA FLJ52848, highly similar to ATP-dependent RNA helicase DDX3X                                  | DKDAYSFGSR           | 26.2   | 2.471 | 656.7642209 | 2 | -0.00051   | -0.388   | 109  | 119  |
| IP100909544 | cDNA FLJ52848, highly similar to ATP-dependent RNA helicase DDX3X                                  | SDYDGGISR            | 104.79 | 2.984 | 525.2007443 | 2 | -0.000563  | -0.536   | 146  | 154  |
| IP100909544 | cDNA FLJ52848, highly similar to ATP-dependent RNA helicase DDX3X                                  | GRSDYDGGISR          | 43.97  | 2.565 | 421.5098568 | 3 | -0.000291  | -2.3     | 144  | 154  |
| IP100298347 | Isoform 2 of Tyrosine-protein phosphatase non-receptor type 11                                     | IQNTGQYDLYGEEK       | 30.97  | 2.994 | 908.3775632 | 2 | -0.000825  | -0.454   | 56   | 70   |
| IP100298347 | Isoform 2 of Tyrosine-protein phosphatase non-receptor type 11                                     | GHEYTNK              | 47.96  | 1.845 | 521.2237515 | 2 | -0.00141   | -1.35    | 539  | 546  |
| IP100003438 | DnaI homolog subfamily C member 8                                                                  | ALDVIQAGKEYVEHTVK    | 0      | 1.777 | 660.665649  | 3 | -0.00323   | -1.63    | 119  | 135  |
| IP100016089 | Splicing factor 3B subunit 1                                                                       | IYNDKNTYR            | 24.95  | 2.702 | 488.8926693 | 3 | -0.000769  | -0.514   | 1287 | 1297 |
| IP100022791 | Ribonuclease P protein subunit p29                                                                 | SVYHALSQR            | 74.63  | 1.801 | 613.302551  | 2 | -0.00095   | -0.775   | 3    | 12   |
| IP100328526 | Isoform ARPP-19 of cAMP-regulated phosphoprotein 19                                                | YFDSGDYMAK           | 50.19  | 1.887 | 695.7533708 | 2 | 0.00019    | 0.137    | 59   | 69   |
| IP100328526 | Isoform ARPP-19 of cAMP-regulated phosphoprotein 19                                                | ARYPHLGGKPGGSDFLR    | 225.53 | 2.269 | 495.4967647 | 4 | -0.00194   | -0.982   | 34   | 50   |
| IP100025087 | Isoform 1 of Cellular tumor antigen p53                                                            | KKPLDGEYFLQIR        | 129.43 | 5.021 | 596.6411739 | 3 | -0.00215   | -1.21    | 320  | 333  |
| IP100030275 | Heat shock protein 75 kDa, mitochondrial                                                           | NiYFLCAPNR           | 58.42  | 2.53  | 682.2971799 | 2 | -0.000457  | -0.325   | 496  | 503  |
| IP100221092 | 40S ribosomal protein S16                                                                          | GGGHVAQYVIR          | 1000   | 2.241 | 441.2189022 | 3 | -0.00087   | -0.658   | 74   | 85   |
| IP100909921 | cDNA FLJ60146, highly similar to JmjC domain-containing histone demethylase YREDYEPALYR            | YREDYEPALYR          | 37.87  | 3.28  | 556.5864864 | 3 | -0.00332   | -1.99    | 539  | 550  |
| IP100647915 | 24 kDa protein                                                                                     | GPAYGLSR             | 65.61  | 1.564 | 450.7026669 | 2 | -0.000618  | -0.686   | 26   | 33   |
| IP100647915 | 24 kDa protein                                                                                     | GASQACMTGYGMR        | 50.64  | 2.901 | 732.2947385 | 2 | 0.000325   | 0.154    | 204  | 217  |
| IP100910763 | Uncharacterized protein                                                                            | GKLDYQER             | 1000   | 2.31  | 602.2556149 | 2 | -0.00152   | -1.26    | 73   | 81   |
| IP100910763 | Uncharacterized protein                                                                            | DYSGYQR              | 50.64  | 1.425 | 484.6795041 | 2 | -0.000343  | -0.355   | 340  | 346  |
| IP100910763 | Uncharacterized protein                                                                            | LDDYQER              | 1000   | 2.212 | 509.697601  | 2 | -0.00105   | -1.03    | 75   | 81   |
| IP100003847 | Zinc finger protein 324A                                                                           | KPTGVSVLYWER         | 110.85 | 2.341 | 505.5851131 | 3 | -0.00124   | -0.817   | 135  | 146  |
| IP100166500 | E3 SUMO-protein ligase PIAS4                                                                       | TPLAGPNIDVPLVYK      | 84.46  | 2.462 | 899.4458005 | 2 | 0.000649   | 0.361    | 99   | 114  |
| IP100641788 | U1 small nuclear ribonucleoprotein C                                                               | FYDcYDYLTHSDSPVR     | 40.26  | 2.832 | 793.6418453 | 3 | -0.000171  | -0.072   | 25   | 42   |
| IP100645678 | 60S ribosomal protein L27a                                                                         | INFDKYHPGYFGK        | 98.63  | 4.582 | 555.9201656 | 3 | -0.000198  | -1.19    | 43   | 55   |
| IP100893431 | cDNA FLJ53410, highly similar to Eukaryotic translation initiation factor 3 subunitWTETVYR         | WTETVYR              | 30.97  | 1.896 | 517.7211301 | 2 | -0.000391  | -0.378   | 259  | 265  |
| IP100893431 | cDNA FLJ53410, highly similar to Eukaryotic translation initiation factor 3 subunitINGDYLVK        | INGDYLVK             | 1000   | 2.687 | 452.7119748 | 2 | -0.000147  | -1.4     | 446  | 453  |
| IP101010755 | cDNA FLJ57326, highly similar to ATP-dependent RNA helicase DDX1                                   | VWYHLCSSR            | 122.98 | 2.504 | 425.1774288 | 3 | -0.00216   | -1.69    | 498  | 506  |
| IP100000494 | 60S ribosomal protein L5                                                                           | TdYAR                | 58.42  | 1.914 | 434.6656186 | 2 | -0.000814  | -0.938   | 28   | 33   |
| IP100291939 | Structural maintenance of chromosomes protein 1A                                                   | IEKLEEYITTSK         | 41.47  | 1.485 | 511.9198909 | 3 | -0.0015    | -0.98    | 435  | 446  |
| IP100168859 | myc-associated zinc finger protein isoform 2                                                       | GFTTAAYLR            | 79.9   | 1.514 | 540.2499386 | 2 | -0.000674  | -0.625   | 427  | 435  |
| IP100012795 | Eukaryotic translation initiation factor 3 subunit 1                                               | SYSSGGEDGYVR         | 117.08 | 2.307 | 678.759155  | 2 | -0.000442  | -0.326   | 299  | 310  |
| IP100011676 | Neural Wiskott-Aldrich syndrome protein                                                            | VYDFIEK              | 1000   | 2.206 | 553.762756  | 2 | 0.0000605  | 0.0547   | 254  | 261  |
| IP100399170 | Isoform 2 of Regulator of nonsense transcripts 1                                                   | JAyFTLTK             | 104.79 | 2.619 | 516.7628171 | 2 | 0.000583   | 0.564    | 342  | 349  |
| IP100893918 | Valyl-tRNA synthetase                                                                              | LHEEGILYR            | 1000   | 1.98  | 605.2871701 | 2 | -0.000511  | -0.423   | 462  | 470  |
| IP100893918 | Valyl-tRNA synthetase                                                                              | IYHQLK               | 1000   | 2.094 | 441.2178647 | 2 | -0.000822  | -0.933   | 427  | 432  |
| IP100893918 | Valyl-tRNA synthetase                                                                              | GDRYHQLK             | 1000   | 3.467 | 403.8640438 | 3 | -0.00185   | -1.53    | 424  | 432  |
| IP100853433 | Uncharacterized protein                                                                            | IMEYEEK              | 30.97  | 1.579 | 528.2119748 | 2 | -0.0000198 | -0.00188 | 54   | 60   |
| IP100853433 | Uncharacterized protein                                                                            | IMEYEEK              | 52.4   | 1.858 | 592.259155  | 2 | -0.000642  | -0.542   | 54   | 61   |
| IP100000728 | Isoform 1 of Ubiquitin carboxyl-terminal hydrolase 15                                              | NSNYLPSYATK          | 60.18  | 2.439 | 830.8398434 | 2 | 0.00007    | 0.0422   | 260  | 272  |
| IP100000728 | Isoform 1 of Ubiquitin carboxyl-terminal hydrolase 15                                              | NVDYSEGR             | 30.97  | 1.793 | 590.7187497 | 2 | -0.00155   | -1.31    | 273  | 281  |
| IP100945276 | Uncharacterized protein                                                                            | HNYYFNYR             | 58.42  | 2.772 | 685.2900387 | 2 | -0.000674  | -0.492   | 89   | 97   |
| IP100013654 | Isoform 2 of Dynactin subunit 3                                                                    | YLDPEYIDR            | 196    | 2.253 | 632.2686154 | 2 | -0.000621  | -0.491   | 67   | 75   |
| IP100642944 | Poly(A) binding protein, cytoplasmic 4 (Inducible form), isoform CRA_e                             | IVGSKPLVALAQR        | 74.47  | 2.214 | 532.2957149 | 3 | -0.000832  | -0.522   | 357  | 370  |
| IP100642944 | Poly(A) binding protein, cytoplasmic 4 (Inducible form), isoform CRA_e                             | KAHLNTQYMQR          | 89.92  | 2.311 | 490.5620418 | 3 | -0.00205   | -1.4     | 375  | 385  |
| IP100554788 | Keratins, type I cytoskeletal 18                                                                   | STFSTNYR             | 60.18  | 1.806 | 528.2138669 | 2 | 0.000822   | 0.0779   | 7    | 14   |
| IP100163608 | Isoform 5 of Partitioning defective 3 homolog                                                      | ECHMMDALVAQK         | 1000   | 1.759 | 534.8       |   |            |          |      |      |

|              |                                                                                      |                        |                 |       |             |   |            |         |      |      |
|--------------|--------------------------------------------------------------------------------------|------------------------|-----------------|-------|-------------|---|------------|---------|------|------|
| IP100026167  | NHP2-like protein 1                                                                  | LLDLVQQSChYK           | 70.88           | 2.477 | 780.8604123 | 2 | -0.000492  | -0.315  | 22   | 33   |
| IP100026167  | NHP2-like protein 1                                                                  | KLLDLVQQSChYK          | 64.24           | 2.003 | 563.6069942 | 3 | -0.00316   | -1.87   | 21   | 33   |
| IP100965354  | Uncharacterized protein                                                              | DVGLADRFEeYK           | 1000            | 1.841 | 540.2434078 | 3 | -0.00105   | -0.651  | 98   | 110  |
| IP100718985  | isoform 2 of Glucocorticoid receptor DNA-binding factor 1                            | NEEENySVPHdSTGQK       | 54.16           | 3.12  | 676.2849727 | 3 | -0.000358  | -0.177  | 1099 | 1115 |
| IP100910915  | cDNA FLJ54756, moderately similar to Homo sapiens nitric oxide synthase intera       | NcTAGAVYTYHEK          | 27.96           | 1.869 | 531.8850704 | 3 | -0.00133   | -0.835  | 7    | 19   |
| IP100170786  | WW domain-binding protein 11                                                         | LYEKENPDIYKELR         | 265.61          | 2.766 | 630.6426387 | 3 | 0.00704    | 3.72    | 95   | 108  |
| IP100306369  | tRNA (cytosine-5)-methyltransferase NSUN2                                            | KLSSEYVSAQK            | 0               | 1.991 | 661.3054806 | 2 | -0.00099   | -0.749  | 640  | 650  |
| IP100306369  | tRNA (cytosine-5)-methyltransferase NSUN2                                            | QLYMVSK                | 74.63           | 1.48  | 474.7167966 | 2 | -0.000858  | -0.905  | 559  | 565  |
| IP100377011  | ubiquitin-conjugating enzyme E2 E1 isoform 2                                         | GDNyEWR                | 1000            | 2.365 | 566.7269284 | 2 | -0.000495  | -0.437  | 56   | 63   |
| IP100646890  | 64 kDa protein                                                                       | SSDANyPAYEWSNR         | 24.95           | 1.984 | 951.8715817 | 2 | 0.00191    | 1       | 361  | 375  |
| IP100102997  | Isoform 2 of ATPase WRNIP1                                                           | AGEEHyNCISALHK         | 128.78          | 2.266 | 570.2434078 | 3 | -0.000919  | -0.538  | 470  | 483  |
| IP100160009  | cDNA FLJ51486                                                                        | STSQVNLQPDyINPR        | 143.16          | 1.802 | 962.9620969 | 2 | -0.000758  | -0.394  | 85   | 100  |
| IP100140420  | Staphylococcal nuclease domain-containing protein 1                                  | EyGHYLGK               | 113.53          | 1.706 | 577.2542111 | 2 | -0.000293  | -0.0254 | 108  | 116  |
| IP100140420  | Staphylococcal nuclease domain-containing protein 1                                  | SEAVVEyVFSGSR          | 88.93           | 2.031 | 755.3353879 | 2 | 0.000424   | 0.281   | 527  | 539  |
| IP100140420  | Staphylococcal nuclease domain-containing protein 1                                  | IWRDyVAPTANLDQK        | 148.41          | 3.668 | 623.9676509 | 3 | -0.00292   | -1.56   | 325  | 339  |
| IP100654603  | Isoform 2 of Girdin                                                                  | DSNPyATLPR             | 48.15           | 1.533 | 607.2662961 | 2 | -0.000759  | -0.626  | 1767 | 1776 |
| IP100607575  | Retinoid X receptor, beta                                                            | HYGYSeGcK              | 54.16           | 2.323 | 480.5900023 | 3 | -0.0012    | -0.834  | 216  | 226  |
| IP100477803  | Putative uncharacterized protein DKFZ781L0540 (Fragment)                             | IDIDyQK                | 1000            | 1.694 | 487.7157895 | 2 | -0.0000726 | -0.0745 | 168  | 174  |
| IP100022521  | Isoform 2 of Dual specificity tyrosine-phosphorylation-regulated kinase 2            | VTYIQSR                | 52.4            | 1.903 | 555.250046  | 2 | -0.00104   | -0.94   | 306  | 313  |
| IP100164672  | mRNA-decapping enzyme 1A                                                             | SASPvHGFTVNR           | 98.4            | 2.821 | 510.2362362 | 2 | -0.00187   | -1.22   | 60   | 72   |
| IP100000874  | Peroxiredoxin-1                                                                      | SKEYFSK                | 107.96          | 2.695 | 484.7101437 | 2 | -0.000564  | -0.582  | 191  | 197  |
| IP100479186  | Isoform M2 of Pyruvate kinase isozymes M1/M2                                         | LNFSGHTEyHAETIK        | 18.45           | 3.438 | 491.7228084 | 4 | -0.00267   | -1.36   | 74   | 89   |
| IP100479186  | Isoform M2 of Pyruvate kinase isozymes M1/M2                                         | GDyPLEAVR              | 1000            | 2.193 | 550.2453    | 2 | 0.000148   | 0.135   | 368  | 376  |
| IP100300371  | Isoform 1 of Splicing factor 3B subunit 3                                            | HIANyVIGQITGHR         | 99.5            | 5.155 | 587.2932735 | 3 | -0.000456  | -0.259  | 985  | 999  |
| IP100026970  | FACT complex subunit SPT16                                                           | DLYIRPNIAQK            | 1000            | 1.573 | 470.9102474 | 3 | 0.000286   | 0.188   | 664  | 674  |
| IP100026970  | FACT complex subunit SPT16                                                           | LKDLYIRPNIAQK          | 1000            | 1.357 | 551.3026729 | 3 | -0.00156   | -0.943  | 662  | 674  |
| IP1001013558 | cDNA FLJ36464, highly similar to Fetal Alzheimer antigen                             | GNINNYFK               | 1000            | 2.268 | 525.226257  | 2 | -0.00099   | -0.989  | 740  | 747  |
| IP100975721  | Uncharacterized protein                                                              | RDYEDVGRDyHFVTSR       | 73.89           | 2.594 | 524.481811  | 4 | 0.000243   | 0.116   | 738  | 753  |
| IP100640632  | ROD1 regulator of differentiation 1                                                  | SQPvYIQYSNRH           | 69.51           | 2.702 | 524.5717159 | 3 | -0.00123   | -0.782  | 28   | 39   |
| IP100418240  | nebulin isoform 2                                                                    | KPYCNAHYK              | 163.73          | 3.177 | 453.1965328 | 3 | -0.00254   | -1.87   | 50   | 59   |
| IP100176637  | Eukaryotic translation initiation factor 2 subunit 2-like protein                    | LYFLQcETHSR            | 239.46          | 3.215 | 847.3468014 | 2 | -0.00108   | -0.637  | 291  | 302  |
| IP100333010  | Calcium homeostasis endoplasmic reticulum protein                                    | QVQVALDDPeyYR          | 0               | 2.166 | 601.9409175 | 3 | 0.000776   | 0.153   | 885  | 899  |
| IP100513712  | Isoform 2 of Zinc finger protein 598                                                 | RNEGvVGGEDyEEVDR       | 1000            | 4.535 | 634.9342647 | 3 | -0.0000824 | -0.0433 | 296  | 311  |
| IP100513712  | Isoform 2 of Zinc finger protein 598                                                 | RNEGvVGGEDyEEVDRYSR    | 99.84           | 2.35  | 770.330074  | 3 | -0.000254  | -0.11   | 296  | 314  |
| IP100513712  | Isoform 2 of Zinc finger protein 598                                                 | NEGvVGGEDyEEVDRYSR     | 37.58           | 2.581 | 718.2990718 | 3 | -0.000961  | -0.446  | 297  | 314  |
| IP100985393  | Protein                                                                              | TPQEYLK                | 135.24          | 2.053 | 493.7212826 | 2 | -0.000186  | -0.189  | 43   | 49   |
| IP101015368  | 111 kDa protein                                                                      | LAYVAPTIRK             | 147.48          | 2.363 | 590.8106686 | 2 | 0.000286   | 0.242   | 494  | 503  |
| IP101015368  | 111 kDa protein                                                                      | SGSvSYLEER             | 53.98           | 2.885 | 635.7532956 | 2 | -0.00046   | -0.362  | 908  | 917  |
| IP101015368  | 111 kDa protein                                                                      | TYDEYQR                | 30.97           | 1.879 | 578.2214352 | 2 | -0.000981  | -0.849  | 761  | 768  |
| IP100736859  | Isoform 4 of Heterogeneous nuclear ribonucleoprotein U-like protein 1                | QNQFYDQVTKIQENSGCYER   | 20.2            | 3.425 | 852.7061763 | 3 | -0.00165   | -0.645  | 7    | 26   |
| IP100411690  | Isoform 2 of La-related protein 1                                                    | THFDyQFGYR             | 98.4            | 2.284 | 707.2850949 | 2 | -0.000562  | -0.397  | 280  | 289  |
| IP100922490  | Isoform 3 of Aryl hydrocarbon receptor nuclear translocator                          | FSEIHMINADQSK          | 84.93           | 2.255 | 582.5890499 | 3 | -0.00213   | -1.22   | 543  | 556  |
| IP100006800  | Isoform Long of Autophagy protein 5                                                  | EAEFYLLPR              | 30.97           | 1.768 | 722.3509518 | 2 | 0.00145    | 1.01    | 31   | 41   |
| IP100999522  | Isoform 1 of Homeodomain-interacting protein kinase 3                                | TvCStyLQSR             | 30.97           | 1.987 | 647.7787472 | 2 | -0.000622  | -0.481  | 354  | 363  |
| IP100903344  | cDNA FLJ40239 fs, clone TESTI2023436, highly similar to Peptidyl-prolyl cis-trans-ly | FNHTNNAQSQWERSQNSSSGDK | 50.64           | 5.989 | 717.3203731 | 4 | -0.000599  | -0.178  | 22   | 46   |
| IP100304612  | 60S ribosomal protein L13a                                                           | FAYLGR                 | 1000            | 1.613 | 403.6831967 | 2 | -0.00166   | -2.06   | 135  | 140  |
| IP100219217  | L-lactate dehydrogenase B chain                                                      | MVVESAYEVIK            | 50.64           | 2.221 | 674.3171994 | 2 | -0.000553  | -0.41   | 234  | 244  |
| IP100219217  | L-lactate dehydrogenase B chain                                                      | IVADKDYSVTANSK         | 21.95           | 2.989 | 530.9187008 | 3 | -0.00127   | -0.801  | 78   | 91   |
| IP100219217  | L-lactate dehydrogenase B chain                                                      | mVVESAYEVIK            | 1,000.00, 50.64 | 1.849 | 682.3144528 | 2 | -0.000961  | -0.705  | 234  | 244  |
| IP100021828  | Cystatin-B                                                                           | AKHDELTYE              | 67.96           | 1.959 | 602.2500656 | 2 | -0.00652   | -5.42   | 90   | 98   |
| IP100742900  | mitogen-activated protein kinase 3 isoform 2                                         | JDPEHDTGLFTEyVATR      | 53.49           | 4.152 | 511.3391109 | 3 | -0.00104   | -0.464  | 190  | 208  |
| IP100930688  | Tubulin alpha-1B chain                                                               | LDHKFDLYAK             | 1000            | 2.669 | 487.5599361 | 3 | -0.000968  | -0.663  | 391  | 401  |
| IP100930688  | Tubulin alpha-1B chain                                                               | VGINyQPPTyVPGDGLAK     | 93.41           | 1.828 | 952.9801022 | 2 | -0.000247  | -0.13   | 353  | 370  |
| IP100930688  | Tubulin alpha-1B chain                                                               | FDLMyAK                | 1000            | 1.91  | 484.2038571 | 2 | -0.000237  | -0.245  | 395  | 401  |
| IP100014263  | Isoform Long of Eukaryotic translation initiation factor 4H                          | AySFGGGR               | 67.96           | 1.881 | 491.1946713 | 2 | -0.00161   | -1.64   | 11   | 19   |
| IP100910194  | cDNA FLJ60565, highly similar to Nuclear pore complex protein Nup153                 | SvYFKPSLTPSGEFR        | 20.98           | 2.306 | 598.9540401 | 3 | -0.000356  | -0.198  | 380  | 394  |
| IP100793717  | Protein                                                                              | QLMlyYHR               | 30.97           | 1.709 | 602.2725217 | 2 | -0.00141   | -1.17   | 209  | 216  |
| IP100246058  | Programmed cell death 6-interacting protein                                          | KDNDFyHDRVLDK          | 1000            | 3.427 | 489.4817805 | 4 | -0.00308   | -1.58   | 313  | 327  |
| IP100246058  | Programmed cell death 6-interacting protein                                          | DNDfyHDRVLDK           | 1000            | 2.54  | 609.6087032 | 3 | -0.00127   | -0.694  | 314  | 327  |
| IP100141113  | cDNA FLJ45031 fs, clone BRAWH3018548, highly similar to Vinculin                     | SFLDSvYR               | 46.21           | 1.72  | 512.710571  | 2 | -0.00081   | -0.79   | 743  | 750  |
| IP101013569  | Tight Junction protein ZO-1                                                          | QyFEQYSR               | 117.47          | 1.805 | 600.7397458 | 2 | -0.00096   | -0.8    | 1190 | 1197 |
| IP100909998  | cDNA FLJ51242, moderately similar to Eukaryotic translation initiation factor 2 s    | iyIDLSK                | 195.43          | 1.885 | 438.1990964 | 2 | -0.00136   | -1.55   | 81   | 87   |
| IP100909998  | cDNA FLJ51242, moderately similar to Eukaryotic translation initiation factor 2 s    | vDKEGKyIDLSK           | 85.93           | 1.587 | 492.2450252 | 3 | -0.000301  | -0.204  | 76   | 87   |
| IP100909746  | cDNA FLJ51502, highly similar to 60S ribosomal protein L18a                          | SSGEvYcGQYFEK          | 157.94          | 2.428 | 841.8608395 | 2 | 0.0006622  | 0.037   | 57   | 70   |
| IP100479307  | Isoform 2 of Myosin-10                                                               | TGLEDEPRLyFVDR         | 113.81          | 2.509 | 597.274654  | 3 | 0.00032    | 0.179   | 5    | 18   |
| IP100009328  | Eukaryotic initiation factor 4A-III                                                  | EQYDVyR                | 88.93           | 1.739 | 583.2503659 | 2 | -0.00022   | -0.189  | 199  | 205  |
| IP100377261  | Isoform 1 of Far upstream element-binding protein 3                                  | AWEDyYK                | 30.97           | 1.62  | 527.700256  | 2 | 0.000361   | 0.342   | 519  | 526  |
| IP100332552  | Isoform 1 of Zinc finger and BTB domain-containing protein 40                        | AyQQLSLWYHNR           | 75.44           | 2.214 | 575.5947261 | 3 | -0.000998  | -0.582  | 1014 | 1026 |
| IP100299095  | Sorting nexin-2                                                                      | YLHVGYVPPAEK           | 30.18           | 2.565 | 554.9478145 | 2 | -0.00203   | -1.22   | 198  | 211  |
| IP100333837  | Isoform 3 of Set1/Ash2 histone methyltransferase complex subunit ASH2                | EHPDQSKPPEEDyK         | 106.97          | 2.235 | 640.5949092 | 3 | -0.00135   | -0.703  | 144  | 159  |
| IP100011528  | Cleavage stimulation factor subunit 1                                                | TQAFNHTEDyVLLPDER      | 89.92           | 3.455 | 743.0073848 | 3 | -0.000922  | -0.414  | 357  | 374  |
| IP100289773  | CCAAT/enhancer-binding protein beta                                                  | KPAEYGYVSLGR           | 84.46           | 2.594 | 473.8942562 | 3 | -0.000308  | -0.217  | 133  | 144  |
| IP100010872  | CBX4 protein                                                                         | SGKYyQLNSK             | 24.95           | 2.23  | 477.5504146 | 3 | -0.000133  | -0.0928 | 147  | 157  |
| IP100651660  | 60S ribosomal protein L3 isoform b                                                   | NNASTDYDLSDK           | 50.19           | 2.03  | 711.7750241 | 2 | -0.000503  | -0.354  | 252  | 263  |
| IP100550995  | PIH1 domain-containing protein 1                                                     | IQLGDLyTPAPGR          | 30.97           | 3.162 | 805.3845822 | 2 | -0.00169   | -1.05   | 187  | 200  |
| IP100011609  | Isoform II of Ubiquitin-protein ligase E3A                                           | DVTyLTEEK              | 52.4            | 1.499 | 589.2548825 | 2 | -0.00119   | -1.01   | 124  | 132  |
| IP100743813  | Isoform 1 of Abnormal spindle-like microcephaly-associated protein                   | SnyYSFK                | 67.96           | 1.952 | 551.236694  | 2 | -0.000164  | -0.148  | 459  | 466  |
| IP100981806  | Protein                                                                              | GQyLYMK                | 27.96           | 1.893 | 571.7240597 | 2 | -0.0014    | -1.22   | 62   | 69   |
| IP100152708  | U3 small nucleolar RNA-associated protein 15 homolog                                 | ELTFKEHSdyYR           | 35.48           | 3.3   | 572.9375606 | 3 | -0.00289   | -1.69   | 156  | 168  |
| IP100152708  | U3 small nucleolar RNA-associated protein 15 homolog                                 | FKDTAyCATR             | 47.48           | 1.856 | 487.2079769 | 3 | 0.0000887  | 0.0608  | 79   | 89   |
| IP100152708  | U3 small nucleolar RNA-associated protein 15 homolog                                 | EHSdyYR                | 74.96           | 1.74  | 493.1926572 | 2 | -0.000537  | -0.545  | 162  | 168  |
| IP100647797  | Uncharacterized protein                                                              | TLHyEctVLVK            | 46.67           | 1.87  | 727.8583371 | 2 | -0.00314   | -2.16   | 71   | 81   |
| IP100965722  | cDNA FLJ52361, highly similar to T-complex protein 1 subunit epsilon                 | HKLDVTSVEDyKALQK       | 133.42          | 4.204 | 489.2478023 | 4 | -0.00119   | -0.61   | 209  | 224  |
| IP100965722  | cDNA FLJ52361, highly similar to T-complex protein 1 subunit epsilon                 | HKLDVTSVEDyQK          | 128.78          | 2.382 | 505.2361751 | 3 | -0.00125   | -0.827  | 209  | 220  |
| IP100797126  | nascent polypeptide-associated complex subunit alpha isoform a                       | SPASDYIVTfGEAK         | 30.97           | 3.051 | 782.8504025 | 2 | -0.000747  | -0.477  | 1977 | 1990 |
| IP100789674  | cDNA FLJ56271, highly similar to Coatomer subunit beta                               | VHMFEASHdyR            | 41.47           | 3.552 | 528.8936153 | 3 | -0.00183   | -1.16   | 63   | 74   |
| IP100479469  | Myeloid/lymphoid or mixed-lineage leukemia                                           | EyFTFPASK              | 74.96           | 1.91  | 585.2498166 | 2 | -0.000218  | -0.187  | 1229 | 1237 |
| IP100018974  | Homeobox protein DLX-2                                                               | TQyVALPER              | 81.61           | 1.955 | 585.7814938 | 2 | -0.000964  | -0.823  | 174  | 182  |
| IP100025273  | Isoform Long of Trifunctional purine biosynthetic protein adenosine-3                | QyCYDYK                | 0               | 1.245 | 490.6918637 | 2 | -0.000924  | -0.943  | 343  | 350  |
| IP100478496  | Isoform 1 of Ribonuclease P protein subunit p40                                      | HLVQTHyYNYR            | 50.64           | 3.624 | 525.2366329 | 3 | -0.000978  | -0.621  | 31   | 41   |
| IP100645510  | Ubiquitin-fold modifier 1                                                            | ITLTSDRPLyK            | 71.68           | 2.147 | 495.2573228 | 3 | -0.000105  | -0.0709 | 9    | 20   |
| IP101014295  | 31 kDa protein                                                                       | MNSyPYLADR             | 49.9            | 2.286 | 655.2681271 | 2 | -0.000397  | -0.303  | 203  | 212  |
| IP100060627  | Coiled-coil domain-containing protein 124                                            | ELEDAyWKKDDKHKVHR      | 1000            | 4.548 | 533.2305903 | 4 | -0.00174   | -0.817  | 33   | 48   |
| IP100060627  | Coiled-coil domain-containing protein 124                                            | ELEDAyWK               | 1000            | 1.325 | 567.2317502 | 2 | -0.000512  | -0.0452 | 33   | 40   |
| IP100916540  | 4 kDa protein                                                                        | LPACvDcGTGYK           | 24.95           | 3.608 | 810.8433224 | 2 | -0.00174   | -1.07   | 5    | 18   |
| IP100647664  | Uncharacterized protein                                                              | cDTcQYFSR              | 50.64           | 1.699 | 722.7550046 | 2 | -0.000573  | -0.397  | 311  | 320  |
| IP100022143  | Isoform 1 of Extended synaptotagmin-1                                                | HLSPyATyVGDSSHK        | 20.2            | 3.47  | 598.2805172 | 3 | -0.00133   | -0.739  |      |      |





|             |                                                                                        |                        |        |       |             |   |             |          |      |      |
|-------------|----------------------------------------------------------------------------------------|------------------------|--------|-------|-------------|---|-------------|----------|------|------|
| IP100219446 | Phosphatidylethanolamine-binding protein 1                                             | LYEQLSGK               | 152.42 | 1.412 | 509.2368771 | 2 | 0.00000271  | 0.00266  | 180  | 187  |
| IP101010322 | cDNA FLJ357520, highly similar to Homo sapiens NMD3 homolog (NMD3), mRNA               | TSEMNTDKQYfCR          | 98.63  | 2.945 | 587.2327266 | 3 | 0.000338    | 0.192    | 170  | 182  |
| IP10008868  | Microtubule-associated protein 1B                                                      | TSVDGGVYEEK            | 30.97  | 1.823 | 681.2683102 | 2 | -0.00153    | -1.12    | 1898 | 1908 |
| IP100479905 | NADH dehydrogenase (ubiquinone) 1 beta subcomplex subunit 10                           | NRVYFYHR               | 44.63  | 2.904 | 438.8521724 | 3 | -0.00106    | -0.806   | 53   | 60   |
| IP100916455 | Uncharacterized protein                                                                | EDEKDDQAYKfVSR         | 91.31  | 2.509 | 584.592773  | 3 | -0.00166    | -0.946   | 267  | 280  |
| IP100001672 | HDCMD34P                                                                               | ALEQKPDAAQYfCQR        | 27.96  | 2.307 | 655.611816  | 3 | -0.00179    | -0.913   | 15   | 29   |
| IP100439184 | Isoform 1 of Centromere protein R                                                      | HLDSEYFLK              | 0      | 1.801 | 616.2739865 | 2 | 0.0000215   | 0.0174   | 165  | 173  |
| IP100640783 | Isoform 3 of Nucleolar protein 10                                                      | DGQYLATGTfYKPR         | 128.78 | 1.764 | 554.9349361 | 3 | -0.000368   | -0.221   | 13   | 26   |
| IP100178056 | 44 kDa protein                                                                         | HGEIDYEAIVG            | 1000   | 1.854 | 677.307861  | 2 | -0.00143    | -1.06    | 323  | 333  |
| IP100465436 | Catalase                                                                               | GAGAFQFEVTHDfTK        | 65.46  | 1.825 | 598.2686763 | 3 | -0.00455    | -2.54    | 78   | 93   |
| IP100445401 | Isoform 2 of E3 ubiquitin-protein ligase HUW1                                          | TTSNTLHYfHIEQLDK       | 84.93  | 3.542 | 664.9855953 | 3 | -0.00229    | -1.15    | 216  | 231  |
| IP100465044 | Protein RCC2                                                                           | GNLYSFGfPEYQLGHNSDfGK  | 52.57  | 2.233 | 793.9940792 | 3 | -0.0042     | -1.77    | 273  | 293  |
| IP100179326 | Brain-specific angiogenesis inhibitor 1-associated protein 2-like protein 1            | EIEYfETVfTSR           | 88.93  | 2.211 | 703.3163449 | 2 | -0.000362   | -0.257   | 160  | 170  |
| IP100032533 | WD repeat-containing protein 18                                                        | NyISAWELQR             | 135.92 | 2.545 | 680.3090817 | 2 | 0.000512    | 0.376    | 60   | 69   |
| IP100010951 | Epiplakin                                                                              | KGENyVYfNEATR          | 105.44 | 2.134 | 546.250732  | 3 | -0.000681   | -0.416   | 1762 | 1774 |
| IP100019733 | mRNA export factor                                                                     | NyJfFLR                | 1000   | 1.643 | 453.2182004 | 2 | -0.0000508  | -0.0561  | 351  | 356  |
| IP100514311 | CTTNBP2 N-terminal-like protein                                                        | FTSQGPKfPKVSPNSfPGTDfR | 24.95  | 2.535 | 864.0711666 | 3 | -0.000277   | -0.107   | 512  | 534  |
| IP100470771 | SAMD4B protein                                                                         | SRPEPSfHSR             | 59.15  | 2.703 | 635.5229793 | 3 | -0.0000386  | -0.0298  | 160  | 169  |
| IP100006671 | Zinc finger and BTB domain-containing protein 5                                        | VHTGKfPYAcLK           | 68.07  | 1.784 | 494.898376  | 3 | -0.00231    | -1.56    | 634  | 645  |
| IP100926216 | Uncharacterized protein                                                                | KVfSSTHYfLLPERfPSYfLKR | 17.2   | 2.198 | 605.3018184 | 4 | -0.00213    | -0.88    | 885  | 903  |
| IP100843802 | Isoform 1 of Protein KIAA0284                                                          | EPfSYfEIPfTK           | 0      | 1.552 | 645.786926  | 2 | 0.000000363 | 0.000281 | 223  | 232  |
| IP100979595 | Uncharacterized protein                                                                | TySfYfLTDfLWfK         | 0      | 2.739 | 733.8344113 | 2 | -0.0000289  | -0.0197  | 189  | 199  |
| IP100909251 | cDNA FLJ51165, highly similar to DNA damage-binding protein 1                          | TecNHfYfNfMfALfYfLk    | 16.47  | 2.115 | 655.2872921 | 3 | 0.00143     | 0.73     | 587  | 601  |
| IP100642957 | Breast cancer anti-estrogen resistance 3, isoform CRA_c                                | LSEAYfSR               | 0      | 1.567 | 453.1917416 | 2 | -0.00127    | -1.4     | 117  | 123  |
| IP100893758 | Protein                                                                                | HQSNKfYfSLASfLAK       | 15.97  | 2.01  | 566.2858272 | 3 | -0.000595   | -0.351   | 78   | 92   |
| IP100582831 | Uncharacterized protein                                                                | THfTGERfPYfCTEPfGGfGR  | 0      | 2.512 | 707.6155391 | 3 | -0.00119    | -0.561   | 349  | 365  |
| IP100926927 | Protein                                                                                | HSSGQfNfLNTfIYfETfLK   | 0      | 3.761 | 671.9806514 | 3 | -0.00212    | -1.05    | 218  | 234  |
| IP100013774 | Histone deacetylase 1                                                                  | YyAVfNYfPLR            | 0      | 1.819 | 619.7839352 | 2 | -0.000981   | -0.792   | 221  | 229  |
| IP100219543 | Isoform Delta-2 of Serine/threonine-protein phosphatase 2A 56 kDa regulatory subunit 1 | stfKfSGGfPQfVfK        | 18.95  | 3.175 | 423.8919063 | 3 | -0.000958   | -0.754   | 72   | 82   |
| IP100299608 | Isoform 1 of 26S proteasome non-ATPase regulatory subunit 1                            | SNfKPfSTfYfPAPfLVEfPKK | 15.97  | 2.267 | 781.7086177 | 3 | 0.000411    | 0.176    | 804  | 823  |

#### K50E-FGFR3-Myr(-)-shN2

|             |                                                                                       |                              |                    |       |             |   |            |         |     |     |
|-------------|---------------------------------------------------------------------------------------|------------------------------|--------------------|-------|-------------|---|------------|---------|-----|-----|
| IP100955014 | cyclin-dependent kinase 1 isoform 1                                                   | IGEGTyGVVfYK                 | 30.97              | 2.725 | 633.2947995 | 2 | -0.000253  | -0.2    | 10  | 20  |
| IP100955014 | cyclin-dependent kinase 1 isoform 1                                                   | IGEGTyGVVfYK                 | 123.45, 104.74     | 3.095 | 673.2777707 | 2 | -0.000642  | -0.477  | 10  | 20  |
| IP100955014 | cyclin-dependent kinase 1 isoform 1                                                   | IEKIGEGTyGVVfYK              | 85.89, 69.63       | 2.353 | 572.5950313 | 3 | -0.000614  | -0.358  | 7   | 20  |
| IP100955014 | cyclin-dependent kinase 1 isoform 1                                                   | IGEGTyGVVfYK                 | 109.69             | 2.806 | 493.5728756 | 3 | -0.00165   | -1.12   | 10  | 22  |
| IP100013174 | Isoform 1 of RNA-binding protein 14                                                   | YSGfSYfNDfLYR                | 26.2               | 2.347 | 659.2617795 | 2 | 0.000507   | 0.385   | 648 | 657 |
| IP100013174 | Isoform 1 of RNA-binding protein 14                                                   | VIEdDVfKDYfAFVfHfMEK         | 1000               | 4.497 | 721.3283687 | 3 | -0.00104   | -0.479  | 105 | 121 |
| IP100013174 | Isoform 1 of RNA-binding protein 14                                                   | LAELSDfYR                    | 60.18              | 2.579 | 523.7317502 | 2 | -0.000351  | -0.336  | 608 | 615 |
| IP100013174 | Isoform 1 of RNA-binding protein 14                                                   | RLAELSDfYR                   | 58.41              | 1.981 | 601.7824094 | 2 | -0.00133   | -0.11   | 607 | 615 |
| IP100013174 | Isoform 1 of RNA-binding protein 14                                                   | AQfPVSfLGAfYfR               | 51.44              | 1.54  | 650.3087765 | 2 | -0.0000985 | -0.0758 | 239 | 250 |
| IP100013174 | Isoform 1 of RNA-binding protein 14                                                   | SSLdYR                       | 112.12             | 1.703 | 410.6655575 | 2 | -0.000936  | -1.14   | 631 | 636 |
| IP100013174 | Isoform 1 of RNA-binding protein 14                                                   | VIEdDVfKDYfAFVfHfMEK         | 1,000.00, 1,000.00 | 2.523 | 726.6602169 | 3 | -0.000406  | -0.187  | 105 | 121 |
| IP100013174 | Isoform 1 of RNA-binding protein 14                                                   | RLPDAHSDfYAR                 | 59.15              | 3.673 | 460.8734432 | 3 | -0.00155   | -1.12   | 637 | 647 |
| IP100013174 | Isoform 1 of RNA-binding protein 14                                                   | LPDAHSDfYAR                  | 43.97              | 2.653 | 408.8395687 | 3 | -0.00207   | -1.69   | 638 | 647 |
| IP100013174 | Isoform 1 of RNA-binding protein 14                                                   | ASyDDfPYfK                   | 55.92              | 2.536 | 583.7421872 | 2 | -0.000677  | -0.581  | 586 | 594 |
| IP100013174 | Isoform 1 of RNA-binding protein 14                                                   | RPfTKfSSLdYfR                | 24.95, 78.53       | 2.305 | 490.5443721 | 3 | -0.00169   | -1.15   | 626 | 636 |
| IP100013174 | Isoform 1 of RNA-binding protein 14                                                   | ASyVAPfLAQfPAtYfR            | 0                  | 2.602 | 844.9061886 | 2 | -0.000374  | -0.222  | 224 | 238 |
| IP100013174 | Isoform 1 of RNA-binding protein 14                                                   | RLAELSDfYR                   | 122.33             | 3.26  | 453.5576473 | 3 | -0.000935  | -0.688  | 607 | 616 |
| IP100013174 | Isoform 1 of RNA-binding protein 14                                                   | TQfSSAfLAAYfAAQfPQAAASfYR    | 18.95              | 3.98  | 849.0541988 | 3 | -0.000018  | -0.0708 | 518 | 541 |
| IP100013174 | Isoform 1 of RNA-binding protein 14                                                   | sPTKfSSLdYfR                 | 48.15, 60.34       | 1.702 | 657.262756  | 2 | -0.000371  | -0.282  | 627 | 636 |
| IP100013174 | Isoform 1 of RNA-binding protein 14                                                   | SPfPRASyVAPfLAQfPAtYfR       | 0.00, 0.00         | 2.782 | 736.0079952 | 3 | -0.00162   | -0.735  | 220 | 228 |
| IP100013174 | Isoform 1 of RNA-binding protein 14                                                   | RLPDAHSDfYAR                 | 1,000.00, 1,000.00 | 2.062 | 487.5290828 | 3 | -0.00096   | -0.657  | 637 | 647 |
| IP100152906 | Histone H2B type 1-D                                                                  | ESySVfYfYK                   | 60.18              | 2.484 | 609.2602536 | 2 | -0.000344  | -0.283  | 36  | 44  |
| IP100152906 | Histone H2B type 1-D                                                                  | KEfSYfVfYfYK                 | 84.46              | 3.205 | 449.2074276 | 3 | -0.00139   | -1.04   | 35  | 44  |
| IP100152906 | Histone H2B type 1-D                                                                  | KEfSYfVfYfYK                 | 117.47, 133.40     | 2.401 | 475.8630062 | 2 | -0.00099   | -0.694  | 35  | 44  |
| IP100152906 | Histone H2B type 1-D                                                                  | ESySVfYfYK                   | 32.22, 92.52       | 2.242 | 649.2439572 | 2 | 0.000731   | 0.564   | 36  | 44  |
| IP100152906 | Histone H2B type 1-D                                                                  | KEfSYfVfYfYKfVfLk            | 128.57, 222.32     | 3.951 | 589.2787471 | 3 | -0.00127   | -0.717  | 35  | 47  |
| IP100152906 | Histone H2B type 1-D                                                                  | ESySVfYfYKfVfLk              | 53.49, 94.68       | 2.104 | 546.5808101 | 3 | -0.0000777 | -0.0474 | 36  | 47  |
| IP100941201 | Isoform 1 of Peptidyl-prolyl cis-trans isomerase NIMA-interacting 4                   | FcyHfIIfVEGR                 | 1,000.00, 1,000.00 | 2.221 | 709.320007  | 2 | -0.00185   | -1.31   | 120 | 130 |
| IP100941201 | Isoform 1 of Peptidyl-prolyl cis-trans isomerase NIMA-interacting 4                   | FcyHfIIfVEGR                 | 1000               | 4.56  | 701.3229367 | 2 | -0.00108   | -0.769  | 120 | 130 |
| IP100941201 | Isoform 1 of Peptidyl-prolyl cis-trans isomerase NIMA-interacting 4                   | TKfGfYfHfIIfVEGR             | 76.68              | 3.36  | 544.2653804 | 3 | -0.00134   | -0.819  | 118 | 130 |
| IP100000000 | FGFR3 Mutant                                                                          | DVfHfNfLdYfYK                | 27.96              | 3.002 | 416.1763607 | 3 | -0.00119   | -0.958  | 641 | 649 |
| IP100000000 | FGFR3 Mutant                                                                          | DVfHfNfLdYfYKfETfGRfLfPvK    | 115.90, 95.71      | 4.991 | 606.2761836 | 4 | -0.0035    | -1.44   | 641 | 659 |
| IP100000000 | FGFR3 Mutant                                                                          | DVfHfNfLdYfYKfETfGRfLfPvK    | 38.17              | 5.568 | 586.2850337 | 4 | -0.00177   | -0.754  | 641 | 659 |
| IP100000000 | FGFR3 Mutant                                                                          | DVfHfNfLdYfYKfETfGRfLfPvK    | 27.96              | 3.469 | 635.6110225 | 3 | -0.000709  | -0.372  | 641 | 655 |
| IP100000000 | FGFR3 Mutant                                                                          | MDfKfPANCfHdYfMfMfMR         | 103.45             | 2.293 | 692.6248165 | 3 | 0.000908   | 0.437   | 713 | 728 |
| IP100000000 | FGFR3 Mutant                                                                          | DLfVfSafQVfQAR               | 100.09             | 2.394 | 681.3000485 | 2 | -0.00022   | -0.161  | 593 | 603 |
| IP100000000 | FGFR3 Mutant                                                                          | DVfHfNfLdYfYKfETfGRfLfPvK    | 116.57, 100.54     | 3.168 | 496.9515681 | 4 | -0.00166   | -0.837  | 641 | 655 |
| IP100010740 | Isoform Long of Splicing factor, proline- and glutamine-rich                          | FAfQHGfTFEYfESfQR            | 117.47             | 5.356 | 614.9210201 | 3 | -0.00142   | -0.769  | 480 | 493 |
| IP100010740 | Isoform Long of Splicing factor, proline- and glutamine-rich                          | FAfQHGfTFEYfESfQRfWfK        | 48.63, 48.15       | 3.348 | 746.301086  | 3 | -0.00185   | -0.827  | 480 | 495 |
| IP100010740 | Isoform Long of Splicing factor, proline- and glutamine-rich                          | DKfLESEfMEdAYfHEHQANfLLfR    | 160.69             | 4.765 | 627.7773433 | 4 | -0.000929  | -0.37   | 517 | 536 |
| IP100010740 | Isoform Long of Splicing factor, proline- and glutamine-rich                          | mGfYfMDfPR                   | 100.09, 1,000.00   | 1.354 | 483.1666867 | 2 | -0.000793  | -0.822  | 600 | 606 |
| IP100010740 | Isoform Long of Splicing factor, proline- and glutamine-rich                          | mGfYfMDfPR                   | 1000               | 2.121 | 475.1693722 | 2 | -0.000507  | -0.534  | 600 | 606 |
| IP100010740 | Isoform Long of Splicing factor, proline- and glutamine-rich                          | FAfQHGfTFEYfESfQR            | 120.93, 27.96      | 3.83  | 641.5765377 | 3 | -0.0012    | -0.622  | 480 | 493 |
| IP100010740 | Isoform Long of Splicing factor, proline- and glutamine-rich                          | QHfPpYfHQHfHQfPpGfPpGfGfPpGR | 1000               | 4.484 | 621.5317378 | 4 | 0.00115    | 0.463   | 246 | 267 |
| IP100010740 | Isoform Long of Splicing factor, proline- and glutamine-rich                          | EYfEGfPnKfKfPR               | 1000               | 3.341 | 476.2173763 | 3 | -0.000448  | -0.314  | 696 | 706 |
| IP100010740 | Isoform Long of Splicing factor, proline- and glutamine-rich                          | DKfLESEfMEdAYfHEHQANfLLfR    | 1,000.00, 150.31   | 3.426 | 631.7761836 | 4 | -0.000482  | -0.191  | 517 | 536 |
| IP100010740 | Isoform Long of Splicing factor, proline- and glutamine-rich                          | QRfEESfYfSR                  | 23.19              | 2.56  | 567.7324826 | 2 | -0.000886  | -0.781  | 592 | 599 |
| IP100012074 | Isoform 1 of Heterogeneous nuclear ribonucleoprotein R                                | STAYEdYfYfYfPPfPR            | 27.96, 20.19       | 2.831 | 640.2415157 | 3 | -0.000161  | -0.0839 | 428 | 441 |
| IP100012074 | Isoform 1 of Heterogeneous nuclear ribonucleoprotein R                                | LkDYfAFVfHfEDfR              | 1000               | 2.493 | 540.580505  | 3 | -0.000162  | -0.0998 | 373 | 384 |
| IP100012074 | Isoform 1 of Heterogeneous nuclear ribonucleoprotein R                                | STAYEdYfYfYfPPfPR            | 0                  | 4.483 | 613.5859371 | 3 | -0.000565  | -0.307  | 428 | 441 |
| IP100012074 | Isoform 1 of Heterogeneous nuclear ribonucleoprotein R                                | LcDfSfYfEIRfPK               | 27.96              | 3.071 | 473.2113033 | 3 | -0.000632  | -0.446  | 225 | 235 |
| IP100216190 | Isoform 2 of Glycogen synthase kinase-3 beta                                          | GEPNfVfSfYfCfSR              | 30.97              | 2.586 | 681.2814938 | 2 | -0.000929  | -0.682  | 210 | 220 |
| IP100939558 | cDNA FLJ38696 fs, clone KIDNE2001931, highly similar to HETEROGENEOUS NUDYAPfPPfR     |                              | 1000               | 1.362 | 448.1892697 | 2 | -0.000912  | -1.02   | 220 | 226 |
| IP100939558 | cDNA FLJ38696 fs, clone KIDNE2001931, highly similar to HETEROGENEOUS NUDfSfYfGGfPPfR |                              | 33.98              | 1.58  |             |   |            |         |     |     |

|             |                                                                                              |                    |       |             |   |            |         |      |      |
|-------------|----------------------------------------------------------------------------------------------|--------------------|-------|-------------|---|------------|---------|------|------|
| IP100939558 | cDNA FLJ38696 fis, clone KIDNE2001931, highly similar to HETEROGENEOUS NUGGHMDDGGYSMNFMMSSSR | 54.16              | 3.9   | 710.5891109 | 3 | -0.000439  | -0.0206 | 113  | 131  |
| IP100939558 | cDNA FLJ38696 fis, clone KIDNE2001931, highly similar to HETEROGENEOUS NUVDYSSSR             | 49.9               | 2.546 | 536.68457   | 2 | -0.00111   | -1.04   | 297  | 304  |
| IP100939558 | cDNA FLJ38696 fis, clone KIDNE2001931, highly similar to HETEROGENEOUS NUDYSRSSDYPSSR        | 27.96, 64.24       | 2.748 | 527.1871334 | 3 | -0.000908  | -0.575  | 205  | 216  |
| IP100939558 | cDNA FLJ38696 fis, clone KIDNE2001931, highly similar to HETEROGENEOUS NUVDYSSSRDYGYSR       | 27.96              | 2.595 | 588.8881832 | 3 | -0.00143   | -0.809  | 297  | 311  |
| IP100939558 | cDNA FLJ38696 fis, clone KIDNE2001931, highly similar to HETEROGENEOUS NUDYPSRGGYSDRDDGGYR   | 36.63, 20.98       | 2.039 | 680.2493892 | 3 | -0.00104   | -0.51   | 240  | 255  |
| IP100515061 | Histone H2B type 1-J                                                                         | 111.84, 223.67     | 3.305 | 720.2979733 | 2 | -0.00194   | -1.35   | 35   | 44   |
| IP100515061 | Histone H2B type 1-J                                                                         | 111.84             | 4.234 | 680.3159787 | 2 | 0.000406   | 0.298   | 35   | 44   |
| IP100515061 | Histone H2B type 1-J                                                                         | 68.84, 117.47      | 1.791 | 656.2517087 | 2 | 0.000534   | 0.407   | 36   | 44   |
| IP100515061 | Histone H2B type 1-J                                                                         | 60.18              | 1.589 | 616.2680661 | 2 | -0.000419  | -0.341  | 36   | 44   |
| IP100909232 | cDNA FLJ35342, highly similar to Heterogeneous nuclear ribonucleoproteins C                  | 0                  | 1.652 | 840.3320309 | 2 | -0.00029   | -0.172  | 118  | 129  |
| IP100909232 | cDNA FLJ35342, highly similar to Heterogeneous nuclear ribonucleoproteins C                  | 1,000.00, 30.00    | 1.646 | 492.1890561 | 2 | 0.000546   | 0.555   | 123  | 129  |
| IP100909232 | cDNA FLJ35342, highly similar to Heterogeneous nuclear ribonucleoproteins C                  | 19.53              | 3.822 | 631.3146968 | 3 | -0.00109   | -0.574  | 123  | 138  |
| IP100909232 | cDNA FLJ35342, highly similar to Heterogeneous nuclear ribonucleoproteins C                  | 30.97              | 1.842 | 484.1910397 | 2 | -0.000572  | -0.591  | 123  | 129  |
| IP100909232 | cDNA FLJ35342, highly similar to Heterogeneous nuclear ribonucleoproteins C                  | 58.42, 61.94       | 2.209 | 524.1743771 | 2 | -0.000229  | -0.218  | 123  | 129  |
| IP100909232 | cDNA FLJ35342, highly similar to Heterogeneous nuclear ribonucleoproteins C                  | 54.16, 43.29       | 5.09  | 657.9703365 | 3 | -0.000499  | -0.253  | 123  | 138  |
| IP100909232 | cDNA FLJ35342, highly similar to Heterogeneous nuclear ribonucleoproteins C                  | 48.15, 27.96       | 3.043 | 587.2130123 | 3 | 0.000529   | 0.3     | 118  | 129  |
| IP100797148 | Isoform 2 of Heterogeneous nuclear ribonucleoprotein A1                                      | 156.18             | 3.197 | 654.8785397 | 2 | 0.000628   | 0.367   | 232  | 247  |
| IP100797148 | Isoform 2 of Heterogeneous nuclear ribonucleoprotein A1                                      | 30.97              | 5.62  | 887.8367917 | 2 | -0.00117   | -0.658  | 248  | 265  |
| IP100797148 | Isoform 2 of Heterogeneous nuclear ribonucleoprotein A1                                      | 59.36, 207.03      | 4.028 | 596.9101558 | 3 | -0.000411  | -0.0786 | 232  | 247  |
| IP100301503 | Isoform 1 of Transformer-2 protein homolog beta                                              | 1000               | 3.664 | 439.1982418 | 3 | -0.000651  | -0.495  | 252  | 261  |
| IP100301503 | Isoform 1 of Transformer-2 protein homolog beta                                              | 34.27, 79.67       | 4.343 | 598.518127  | 4 | 0.00177    | 0.742   | 198  | 217  |
| IP100301503 | Isoform 1 of Transformer-2 protein homolog beta                                              | 93.15, 64.24, 0.00 | 2.338 | 503.5211177 | 3 | -0.00119   | -0.786  | 262  | 271  |
| IP100301503 | Isoform 1 of Transformer-2 protein homolog beta                                              | 42.72              | 3.352 | 578.5260615 | 4 | -0.000155  | -0.0673 | 198  | 217  |
| IP100301503 | Isoform 1 of Transformer-2 protein homolog beta                                              | 0                  | 2.311 | 484.1871945 | 2 | -0.000963  | -0.995  | 219  | 224  |
| IP100301503 | Isoform 1 of Transformer-2 protein homolog beta                                              | 0                  | 1.283 | 695.2590329 | 2 | -0.00109   | -0.781  | 229  | 238  |
| IP100301503 | Isoform 1 of Transformer-2 protein homolog beta                                              | 20.20, 23.20       | 2.07  | 490.4952727 | 3 | -0.000725  | -0.493  | 229  | 238  |
| IP100301503 | Isoform 1 of Transformer-2 protein homolog beta                                              | 49.22              | 2.578 | 627.5794674 | 3 | -0.00147   | -0.784  | 225  | 238  |
| IP100301503 | Isoform 1 of Transformer-2 protein homolog beta                                              | 51.21, 44.63       | 2.503 | 654.2352291 | 3 | -0.000521  | -0.266  | 225  | 238  |
| IP100301503 | Isoform 1 of Transformer-2 protein homolog beta                                              | 1000               | 3.121 | 491.2321773 | 3 | 0.0000554  | 0.0376  | 252  | 262  |
| IP100301503 | Isoform 1 of Transformer-2 protein homolog beta                                              | 19.01              | 1.119 | 651.7434689 | 2 | -0.000214  | -0.164  | 220  | 228  |
| IP100301503 | Isoform 1 of Transformer-2 protein homolog beta                                              | 21.43              | 2.756 | 562.2378537 | 2 | -0.000744  | -0.662  | 218  | 224  |
| IP100844578 | ATP-dependent RNA helicase A                                                                 | 1000               | 2.032 | 553.2587887 | 2 | 0.00143    | 1.29    | 64   | 71   |
| IP100844578 | ATP-dependent RNA helicase A                                                                 | 1000               | 2.477 | 697.8076779 | 2 | -0.000561  | -0.402  | 6    | 15   |
| IP100844578 | ATP-dependent RNA helicase A                                                                 | 24.95              | 2.745 | 619.9766842 | 3 | -0.000924  | -0.497  | 249  | 264  |
| IP100844578 | ATP-dependent RNA helicase A                                                                 | 0                  | 2.217 | 602.7757565 | 2 | -0.000139  | -0.115  | 16   | 24   |
| IP100844578 | ATP-dependent RNA helicase A                                                                 | 50.64              | 3.899 | 1121.975341 | 2 | 0.00213    | 0.95    | 121  | 141  |
| IP100844578 | ATP-dependent RNA helicase A                                                                 | 1000               | 2.003 | 619.7579343 | 2 | 0.00105    | 0.849   | 6    | 14   |
| IP100844578 | ATP-dependent RNA helicase A                                                                 | 30.97              | 1.564 | 538.7282712 | 2 | -0.000109  | -0.101  | 24   | 24   |
| IP100844578 | ATP-dependent RNA helicase A                                                                 | 24.95              | 2.005 | 506.1821591 | 2 | -0.000833  | -0.824  | 1167 | 1174 |
| IP100844578 | ATP-dependent RNA helicase A                                                                 | 0                  | 1.511 | 633.7795407 | 2 | -0.00077   | -0.608  | 142  | 151  |
| IP100844578 | ATP-dependent RNA helicase A                                                                 | 53.49              | 1.892 | 716.9916378 | 3 | 0.00154    | 0.715   | 738  | 755  |
| IP100844578 | ATP-dependent RNA helicase A                                                                 | 41.47, 23.20       | 3.199 | 449.5108028 | 3 | -0.0016    | -1.19   | 142  | 151  |
| IP100604620 | Nucleolin                                                                                    | 86.01              | 2.568 | 764.3764035 | 2 | -0.00124   | -0.815  | 399  | 410  |
| IP100604620 | Nucleolin                                                                                    | 60.18              | 4.399 | 701.3126827 | 3 | -0.000929  | -0.442  | 458  | 474  |
| IP100604620 | Nucleolin                                                                                    | 268.73             | 4.574 | 928.9031369 | 2 | -0.000129  | -0.688  | 348  | 362  |
| IP100604620 | Nucleolin                                                                                    | 1000               | 1.837 | 510.7440182 | 2 | -0.000615  | -0.603  | 430  | 437  |
| IP100604620 | Nucleolin                                                                                    | 174.94             | 2.3   | 618.3078    | 2 | -0.0000516 | -0.0418 | 428  | 437  |
| IP100604620 | Nucleolin                                                                                    | 30.97              | 2.218 | 620.7789303 | 2 | -0.000291  | -0.234  | 458  | 467  |
| IP100171903 | Isoform 1 of Heterogeneous nuclear ribonucleoprotein M                                       | 113.53             | 2.155 | 651.797485  | 2 | -0.00128   | -0.984  | 61   | 70   |
| IP100171903 | Isoform 1 of Heterogeneous nuclear ribonucleoprotein M                                       | 83.7               | 1.399 | 573.7463986 | 2 | -0.00235   | -2.05   | 61   | 69   |
| IP100171903 | Isoform 1 of Heterogeneous nuclear ribonucleoprotein M                                       | 88.8               | 2.831 | 422.4490414 | 4 | -0.00113   | -0.768  | 57   | 70   |
| IP100171903 | Isoform 1 of Heterogeneous nuclear ribonucleoprotein M                                       | 1000               | 6.09  | 630.282043  | 3 | -0.000213  | -0.113  | 671  | 685  |
| IP100171903 | Isoform 1 of Heterogeneous nuclear ribonucleoprotein M                                       | 1000               | 2.136 | 549.2413326 | 3 | -0.000344  | -0.209  | 673  | 685  |
| IP100171903 | Isoform 1 of Heterogeneous nuclear ribonucleoprotein M                                       | 84.28              | 3.162 | 510.8966671 | 3 | 0.0000246  | 0.0161  | 67   | 69   |
| IP100215884 | Isoform ASF-1 of Serine/arginine-rich splicing factor 1                                      | 0                  | 1.355 | 596.7578732 | 2 | 0.000495   | 0.415   | 165  | 173  |
| IP100215884 | Isoform ASF-1 of Serine/arginine-rich splicing factor 1                                      | 47.48              | 1.817 | 633.3088375 | 3 | 0.000536   | 0.282   | 29   | 43   |
| IP100215884 | Isoform ASF-1 of Serine/arginine-rich splicing factor 1                                      | 102.11             | 2.586 | 621.7612302 | 2 | -0.000991  | -0.798  | 182  | 191  |
| IP100215884 | Isoform ASF-1 of Serine/arginine-rich splicing factor 1                                      | 123.88             | 2.454 | 602.203613  | 2 | -0.000326  | -0.271  | 71   | 83   |
| IP100215884 | Isoform ASF-1 of Serine/arginine-rich splicing factor 1                                      | 46.67              | 1.975 | 736.7959592 | 2 | -0.000833  | -0.566  | 75   | 85   |
| IP100215884 | Isoform ASF-1 of Serine/arginine-rich splicing factor 1                                      | 81.61, 70.88       | 1.794 | 776.7789914 | 2 | -0.0011    | -0.709  | 75   | 85   |
| IP100215884 | Isoform ASF-1 of Serine/arginine-rich splicing factor 1                                      | 30.97              | 2.353 | 532.7094723 | 2 | -0.00131   | -1.23   | 166  | 173  |
| IP100215884 | Isoform ASF-1 of Serine/arginine-rich splicing factor 1                                      | 83.49              | 3.352 | 749.2891843 | 2 | -0.00165   | -1.1    | 143  | 153  |
| IP100215884 | Isoform ASF-1 of Serine/arginine-rich splicing factor 1                                      | 1,000.00, 24.95    | 1.593 | 403.5055538 | 3 | -0.00133   | -1.1    | 165  | 173  |
| IP100215884 | Isoform ASF-1 of Serine/arginine-rich splicing factor 1                                      | 74.96              | 3.144 | 440.8722225 | 3 | -0.00141   | -1.07   | 165  | 174  |
| IP100215884 | Isoform ASF-1 of Serine/arginine-rich splicing factor 1                                      | 1000               | 2.761 | 538.2082516 | 2 | -0.00115   | -1.07   | 66   | 74   |
| IP100479217 | Isoform Short of Heterogeneous nuclear ribonucleoprotein U                                   | 110.61             | 3.027 | 492.2062984 | 4 | -0.000408  | -0.208  | 232  | 246  |
| IP100479217 | Isoform Short of Heterogeneous nuclear ribonucleoprotein U                                   | 166.75             | 4.121 | 593.2536007 | 3 | -0.000227  | -1.28   | 237  | 249  |
| IP100479217 | Isoform Short of Heterogeneous nuclear ribonucleoprotein U                                   | 1000               | 2.195 | 596.278442  | 3 | -0.000416  | -0.233  | 584  | 597  |
| IP100479217 | Isoform Short of Heterogeneous nuclear ribonucleoprotein U                                   | 153.81, 26.20      | 3.226 | 929.3605344 | 2 | -0.000514  | -0.277  | 237  | 249  |
| IP100479217 | Isoform Short of Heterogeneous nuclear ribonucleoprotein U                                   | 102.06             | 4.668 | 791.3378902 | 3 | -0.000506  | -0.213  | 232  | 249  |
| IP100479217 | Isoform Short of Heterogeneous nuclear ribonucleoprotein U                                   | 185.81             | 2.649 | 686.2791135 | 2 | -0.000625  | -0.455  | 237  | 246  |
| IP100479217 | Isoform Short of Heterogeneous nuclear ribonucleoprotein U                                   | 231.56, 177.09     | 3.127 | 817.9935909 | 3 | 0.000265   | 0.108   | 232  | 249  |
| IP100479217 | Isoform Short of Heterogeneous nuclear ribonucleoprotein U                                   | 1,000.00, 1,000.00 | 2.813 | 682.5947261 | 3 | 0.0007074  | 0.0344  | 232  | 246  |
| IP100456887 | Heterogeneous nuclear ribonucleoprotein U-like protein 2                                     | 61.94              | 1.662 | 464.6840512 | 2 | -0.000249  | -0.268  | 213  | 218  |
| IP100456887 | Heterogeneous nuclear ribonucleoprotein U-like protein 2                                     | 52.4               | 1.265 | 508.2059018 | 2 | 0.000152   | 0.15    | 711  | 716  |
| IP100456887 | Heterogeneous nuclear ribonucleoprotein U-like protein 2                                     | 48.15              | 2.952 | 625.5815425 | 3 | 0.000151   | 0.0806  | 721  | 733  |
| IP100456887 | Heterogeneous nuclear ribonucleoprotein U-like protein 2                                     | 58.42              | 1.949 | 632.2459103 | 2 | 0.000469   | 0.371   | 739  | 747  |
| IP100456887 | Heterogeneous nuclear ribonucleoprotein U-like protein 2                                     | 100.09, 122.33     | 1.382 | 548.1896359 | 2 | 0.00129    | 1.18    | 711  | 716  |
| IP100456887 | Heterogeneous nuclear ribonucleoprotein U-like protein 2                                     | 128.57             | 1.918 | 512.698486  | 2 | 0.00012    | 0.118   | 694  | 700  |
| IP100456887 | Heterogeneous nuclear ribonucleoprotein U-like protein 2                                     | 24.95              | 1.734 | 488.1982723 | 3 | -0.000597  | -0.0408 | 701  | 710  |
| IP100456887 | Heterogeneous nuclear ribonucleoprotein U-like protein 2                                     | 89.54, 132.33      | 1.874 | 771.7767331 | 2 | 0.0000831  | 0.0539  | 701  | 710  |
| IP100456887 | Heterogeneous nuclear ribonucleoprotein U-like protein 2                                     | 21.44              | 3.054 | 537.2197871 | 4 | -0.00125   | -0.584  | 721  | 735  |
| IP100456887 | Heterogeneous nuclear ribonucleoprotein U-like protein 2                                     | 45.79              | 3.092 | 582.575378  | 3 | -0.000743  | -0.425  | 736  | 747  |
| IP100456887 | Heterogeneous nuclear ribonucleoprotein U-like protein 2                                     | 123.87, 60.18      | 1.89  | 672.2291867 | 2 | 0.00069    | 0.514   | 739  | 747  |
| IP100220717 | Isoform 3 of Putative RNA-binding protein 15                                                 | 56.46              | 2.328 | 629.2911983 | 3 | 0.000682   | -0.361  | 600  | 616  |
| IP100220717 | Isoform 3 of Putative RNA-binding protein 15                                                 | 1,000.00, 1,000.00 | 2.791 | 717.7600705 | 2 | -0.000942  | -0.657  | 330  | 338  |
| IP100220717 | Isoform 3 of Putative RNA-binding protein 15                                                 | 192.44             | 3.035 | 452.1871334 | 3 | -0.00118   | -0.869  | 330  | 338  |
| IP100220717 | Isoform 3 of Putative RNA-binding protein 15                                                 | 68.07              | 3.401 | 681.3249508 | 3 | -0.000524  | -0.257  | 600  | 617  |
| IP100220717 | Isoform 3 of Putative RNA-binding protein 15                                                 | 140.13             | 2.245 | 824.8280636 | 2 | -0.00102   | -0.621  | 153  | 170  |
| IP100220717 | Isoform 3 of Putative RNA-binding protein 15                                                 | 30.97              | 2.749 | 591.2657468 | 2 | -0.000858  | -0.726  | 411  | 420  |
| IP100220717 | Isoform 3 of Putative RNA-binding protein 15                                                 | 89.92              | 3.648 | 824.7170406 | 3 | 0.000145   | 0.0587  | 575  | 594  |
| IP100220717 | Isoform 3 of Putative RNA-binding protein 15                                                 | 46.21              | 2.422 | 508.7448117 | 2 | 0.0000718  | 0.0707  | 247  | 254  |
| IP100017297 | Matrin-3                                                                                     | 61.1               | 1.528 | 503.5838924 | 3 | -0.00115   | -0.994  | 164  |      |



|             |                                                                                          |                              |                    |       |             |   |           |         |     |     |
|-------------|------------------------------------------------------------------------------------------|------------------------------|--------------------|-------|-------------|---|-----------|---------|-----|-----|
| IP100017297 | Matrin-3                                                                                 | DSFDDRGLSNPLVDYDHGSR         | 46.27              | 4.674 | 611.2648921 | 4 | -0.000533 | -0.218  | 187 | 207 |
| IP100017297 | Matrin-3                                                                                 | TGFyCK                       | 105.08             | 1.866 | 428.1592709 | 2 | -0.000575 | -0.672  | 799 | 804 |
| IP100017297 | Matrin-3                                                                                 | SQESGyYDRMDYEDDLRL           | 18.44              | 2.881 | 595.240356  | 4 | -0.00188  | -0.79   | 208 | 225 |
| IP100017297 | Matrin-3                                                                                 | rRDSFFGGETSHNHyK             | 102.06             | 4.145 | 693.9395748 | 3 | 0.000982  | 0.472   | 230 | 245 |
| IP100017297 | Matrin-3                                                                                 | SQESGyYDR                    | 30.97              | 2.173 | 592.7163083 | 2 | -0.00133  | -1.13   | 208 | 216 |
| IP100017297 | Matrin-3                                                                                 | DDSSFFGETSHNHyKDFSEYER       | 15.47              | 4.377 | 673.2680659 | 4 | 0.00146   | 0.544   | 232 | 252 |
| IP100017297 | Matrin-3                                                                                 | LcSLfyTNEEVAK                | 30.97              | 2.031 | 827.3657834 | 2 | 0.00015   | 0.0906  | 805 | 817 |
| IP100017297 | Matrin-3                                                                                 | SQESGyYDRMDYEDDLRL           | 0.00, 0.00         | 2.974 | 819.972961  | 3 | -0.00293  | -1.19   | 208 | 225 |
| IP100017297 | Matrin-3                                                                                 | NTHcSSLPHyK                  | 155.18             | 4.354 | 517.8854366 | 3 | -0.000932 | -0.601  | 818 | 829 |
| IP100017297 | Matrin-3                                                                                 | DDSSFFGETSHNHyK              | 51.52              | 3.209 | 588.561462  | 3 | -0.00159  | -0.902  | 232 | 245 |
| IP100017297 | Matrin-3                                                                                 | GPSLNPLVDYDHGSR              | 65.46              | 2.731 | 569.5897213 | 3 | -0.000613 | -0.359  | 193 | 207 |
| IP100413671 | Isoform 2 of Bcl-2-associated transcription factor 1                                     | ETGyVVERPSTTK                | 74.96              | 2.46  | 773.8613888 | 2 | -0.000574 | -0.371  | 461 | 473 |
| IP100413671 | Isoform 2 of Bcl-2-associated transcription factor 1                                     | YFLHDDRDDGVDyWAK             | 328.3              | 3.961 | 698.9577633 | 3 | -0.00249  | -1.19   | 844 | 859 |
| IP100413671 | Isoform 2 of Bcl-2-associated transcription factor 1                                     | EEEWDPeYTPK                  | 26.2               | 2.444 | 751.7896725 | 2 | -0.00151  | -1      | 830 | 840 |
| IP100413671 | Isoform 2 of Bcl-2-associated transcription factor 1                                     | FNDhEGDDEETEDYRQFR           | 83.01, 34.27       | 2.083 | 838.2995601 | 3 | 0.000872  | 0.347   | 392 | 410 |
| IP100413671 | Isoform 2 of Bcl-2-associated transcription factor 1                                     | EySGFAGySR                   | 21.95              | 2.137 | 469.2139583 | 3 | -0.000302 | -0.215  | 783 | 794 |
| IP100413671 | Isoform 2 of Bcl-2-associated transcription factor 1                                     | LKDLFDySPPLHK                | 26.2               | 2.608 | 413.9577632 | 4 | -0.00165  | -0.998  | 503 | 515 |
| IP100413671 | Isoform 2 of Bcl-2-associated transcription factor 1                                     | NTEEGLyK                     | 190.73             | 2.276 | 430.8589168 | 3 | -0.000926 | -0.718  | 428 | 438 |
| IP100413671 | Isoform 2 of Bcl-2-associated transcription factor 1                                     | KYFLHDDRDDGVDyWAK            | 211.93             | 3.496 | 741.6567989 | 3 | -0.00038  | -0.171  | 843 | 859 |
| IP100413671 | Isoform 2 of Bcl-2-associated transcription factor 1                                     | DYKLyK                       | 100.09             | 1.044 | 463.1887814 | 2 | -0.00119  | -1.28   | 727 | 732 |
| IP100413671 | Isoform 2 of Bcl-2-associated transcription factor 1                                     | SSFyPDGGDQETAK               | 81.61              | 2.198 | 791.3090207 | 2 | -0.00101  | -0.639  | 317 | 330 |
| IP100413671 | Isoform 2 of Bcl-2-associated transcription factor 1                                     | DLFDySPPLHK                  | 27.96              | 1.483 | 471.2152095 | 3 | -0.000148 | -0.105  | 505 | 515 |
| IP100413671 | Isoform 2 of Bcl-2-associated transcription factor 1                                     | LKETGyVVERPSTTK              | 81.39              | 4.427 | 596.6362911 | 3 | -0.0014   | -0.785  | 459 | 473 |
| IP100413671 | Isoform 2 of Bcl-2-associated transcription factor 1                                     | yFLHDDRDDGVDyWAK             | 1,000.00, 1,000.00 | 3.087 | 725.6137891 | 3 | -0.000801 | -0.368  | 844 | 859 |
| IP100012998 | Isoform 1 of Cleavage and polyadenylation specificity factor subunit 6                   | GPPTDyGRPPYDyR               | 20.2               | 1.758 | 621.2810665 | 3 | -0.000277 | -0.149  | 377 | 392 |
| IP100012998 | Isoform 1 of Cleavage and polyadenylation specificity factor subunit 6                   | HDDyYR                       | 51.06              | 2.278 | 474.6661984 | 2 | -0.000755 | -0.796  | 517 | 522 |
| IP100012998 | Isoform 1 of Cleavage and polyadenylation specificity factor subunit 6                   | GAAPNVyTYTGKR                | 27.96              | 4.735 | 526.25592   | 3 | -0.000417 | -0.264  | 67  | 80  |
| IP100012998 | Isoform 1 of Cleavage and polyadenylation specificity factor subunit 6                   | GAAPNVyTYTGKR                | 27.96, 23.20       | 2.976 | 552.9115596 | 3 | 0.000171  | 0.103   | 67  | 80  |
| IP100012998 | Isoform 1 of Cleavage and polyadenylation specificity factor subunit 6                   | HDDyYR                       | 43.29              | 2.012 | 411.8277584 | 3 | -0.0014   | -1.14   | 517 | 524 |
| IP100012998 | Isoform 1 of Cleavage and polyadenylation specificity factor subunit 6                   | GAAPNVyTYTGK                 | 30.97              | 3.103 | 710.8295285 | 2 | -0.000195 | -0.137  | 67  | 79  |
| IP100012998 | Isoform 1 of Cleavage and polyadenylation specificity factor subunit 6                   | DRHDDyYR                     | 27.96              | 1.976 | 610.2301633 | 2 | -0.000925 | -0.759  | 515 | 522 |
| IP100012998 | Isoform 1 of Cleavage and polyadenylation specificity factor subunit 6                   | DRHDDyYR                     | 1,000.00, 1,000.00 | 3.042 | 538.8593135 | 3 | -0.00117  | -0.737  | 515 | 524 |
| IP100012998 | Isoform 1 of Cleavage and polyadenylation specificity factor subunit 6                   | GPPTDyGRPPYDyR               | 42.94              | 2.19  | 887.7346798 | 3 | -0.000937 | -0.352  | 377 | 400 |
| IP100013891 | Isoform Long of Transformer-2 protein homolog alpha                                      | GyDRYEDyYR                   | 41.47              | 3.282 | 532.2000728 | 3 | -0.000588 | -0.413  | 245 | 255 |
| IP100013891 | Isoform Long of Transformer-2 protein homolog alpha                                      | YEDyYR                       | 21.95              | 1.582 | 711.7718503 | 2 | -0.000851 | -0.598  | 249 | 257 |
| IP100013891 | Isoform Long of Transformer-2 protein homolog alpha                                      | YGLSLGyVvYDQR                | 156.18             | 2.203 | 823.8831784 | 2 | 0.000505  | 0.307   | 142 | 155 |
| IP100013891 | Isoform Long of Transformer-2 protein homolog alpha                                      | RDSyYR                       | 0                  | 1.928 | 527.7031857 | 2 | -0.00098  | -0.93   | 234 | 240 |
| IP100013891 | Isoform Long of Transformer-2 protein homolog alpha                                      | YEDyYR                       | 24.95              | 1.649 | 552.1898801 | 2 | -0.000391 | -0.355  | 249 | 255 |
| IP100013891 | Isoform Long of Transformer-2 protein homolog alpha                                      | GyDRYEDyYR                   | 35.84, 71.22       | 1.985 | 558.855294  | 3 | -0.00062  | -0.37   | 245 | 255 |
| IP100013891 | Isoform Long of Transformer-2 protein homolog alpha                                      | DSyYR                        | 30.97              | 1.294 | 449.6532284 | 2 | 0.000205  | 0.229   | 245 | 240 |
| IP100013891 | Isoform Long of Transformer-2 protein homolog alpha                                      | GyDRYEDyYR                   | 59.51, 27.96       | 2.08  | 997.3627316 | 2 | 0.00168   | 0.843   | 245 | 257 |
| IP100013891 | Isoform Long of Transformer-2 protein homolog alpha                                      | YEDyYR                       | 38.56, 17.99       | 1.251 | 501.50592   | 3 | -0.000948 | -0.631  | 249 | 257 |
| IP100013891 | Isoform Long of Transformer-2 protein homolog alpha                                      | GFAFyYER                     | 1000               | 2.554 | 608.2668454 | 2 | 0.00194   | 1.6     | 161 | 169 |
| IP100013891 | Isoform Long of Transformer-2 protein homolog alpha                                      | GyDRYEDyYR                   | 28.54              | 1.908 | 638.5883175 | 3 | -0.000324 | -0.169  | 245 | 257 |
| IP100012340 | Serine/arginine-rich splicing factor 9                                                   | KEDMEyALR                    | 1000               | 2.053 | 617.762756  | 2 | -0.000339 | -0.275  | 155 | 163 |
| IP100012340 | Serine/arginine-rich splicing factor 9                                                   | DAEDAyGR                     | 1000               | 1.503 | 545.2160641 | 2 | -0.00122  | -1.12   | 64  | 72  |
| IP100012340 | Serine/arginine-rich splicing factor 9                                                   | GSPhyFSPPRY                  | 79.35              | 3.916 | 512.2227779 | 3 | 0.000657  | 0.428   | 210 | 221 |
| IP100012340 | Serine/arginine-rich splicing factor 9                                                   | SHEGETSyR                    | 53.98              | 2.478 | 629.7586667 | 2 | -0.00102  | -0.809  | 172 | 181 |
| IP100012340 | Serine/arginine-rich splicing factor 9                                                   | NGyDyGQR                     | 86.98              | 2.048 | 606.7109982 | 2 | -0.00042  | -0.347  | 73  | 81  |
| IP100012340 | Serine/arginine-rich splicing factor 9                                                   | EKLEDFyKYGR                  | 47.48              | 2.711 | 585.9385982 | 3 | 0.000418  | 0.238   | 27  | 39  |
| IP100012340 | Serine/arginine-rich splicing factor 9                                                   | GPhyFSPPRY                   | 125.90, 81.39      | 2.649 | 538.8784175 | 3 | 0.00124   | 0.771   | 210 | 221 |
| IP100438229 | Isoform 1 of Transcription intermediary factor 1-beta                                    | LiyQLHR                      | 1000               | 2.229 | 585.2951047 | 2 | -0.00494  | -4.23   | 367 | 374 |
| IP100438229 | Isoform 1 of Transcription intermediary factor 1-beta                                    | DcQLNAHKDHQyQLEDAVR          | 1000               | 5.378 | 856.3760372 | 3 | -0.00163  | -0.635  | 231 | 250 |
| IP100438229 | Isoform 1 of Transcription intermediary factor 1-beta                                    | VFGSTTADyNLVIER              | 50.19              | 2.625 | 1016.987793 | 2 | 0.00433   | 2.13    | 508 | 524 |
| IP100438229 | Isoform 1 of Transcription intermediary factor 1-beta                                    | KLiyQLHR                     | 1000               | 3.076 | 433.2326961 | 3 | 0.000112  | 0.0861  | 366 | 374 |
| IP100438229 | Isoform 1 of Transcription intermediary factor 1-beta                                    | DIVENyMR                     | 1000               | 2.41  | 633.766235  | 2 | 0.00162   | 1.28    | 138 | 136 |
| IP100438229 | Isoform 1 of Transcription intermediary factor 1-beta                                    | DHQyQLEDAVR                  | 1000               | 3.693 | 534.2321773 | 3 | 0.00106   | 0.659   | 239 | 250 |
| IP100438229 | Isoform 1 of Transcription intermediary factor 1-beta                                    | DIVENyMR                     | 1,000.00, 1,000.00 | 1.665 | 641.7625729 | 2 | -0.000621 | -0.484  | 128 | 136 |
| IP100438229 | Isoform 1 of Transcription intermediary factor 1-beta                                    | QGSSSQPMVEyQEGSGDDPySAE27.96 | 4.682              | 4.682 | 1213.173828 | 3 | -0.00109  | -0.301  | 435 | 469 |
| IP100032830 | Isoform 1 of Oligoribonuclease, mitochondrial (Fragment)                                 | RWYPEyEFAPK                  | 53.49              | 1.894 | 847.8662717 | 2 | -0.000908 | -0.536  | 189 | 187 |
| IP100032830 | Isoform 1 of Oligoribonuclease, mitochondrial (Fragment)                                 | RWYPEyEFAPK                  | 127.86             | 3.484 | 608.2780147 | 3 | -0.00223  | -1.22   | 178 | 190 |
| IP100032830 | Isoform 1 of Oligoribonuclease, mitochondrial (Fragment)                                 | WYPEyEFAPK                   | 59.15              | 1.349 | 769.8168942 | 2 | 0.00144   | 0.934   | 179 | 189 |
| IP100011913 | Heterogeneous nuclear ribonucleoprotein A0                                               | AVPKEDySGGGGGSSR             | 48.15              | 3.092 | 562.9213253 | 3 | -0.000801 | -0.475  | 173 | 189 |
| IP100011913 | Heterogeneous nuclear ribonucleoprotein A0                                               | EDySGGGGGSSR                 | 27.96              | 2.609 | 646.2515866 | 2 | -0.000478 | -0.37   | 177 | 189 |
| IP100011913 | Heterogeneous nuclear ribonucleoprotein A0                                               | GFGFyFQNHDAADK               | 1000               | 2.84  | 898.3776852 | 2 | -0.000681 | -0.379  | 140 | 154 |
| IP100011913 | Heterogeneous nuclear ribonucleoprotein A0                                               | RGFGFyFQNHDAADK              | 1000               | 3.232 | 651.2883907 | 3 | 0.000196  | 0.1     | 139 | 154 |
| IP100011913 | Heterogeneous nuclear ribonucleoprotein A0                                               | GFGFyFQNHDAADKAAVVK          | 1000               | 2.17  | 566.7690425 | 4 | -0.00153  | -0.676  | 140 | 159 |
| IP100413672 | Isoform 3 of Bcl-2-associated transcription factor 1                                     | GTFHDDRDDGVDyWAK             | 308.22             | 4.506 | 659.5985714 | 3 | -0.00186  | -0.942  | 795 | 810 |
| IP100916600 | Uncharacterized protein                                                                  | VFDKDGyVISAELR               | 104.79             | 5.173 | 471.9221188 | 2 | -0.00141  | -0.771  | 139 | 154 |
| IP100916600 | Uncharacterized protein                                                                  | DNGyVISAELR                  | 72.58              | 2.756 | 673.2932126 | 2 | -0.000426 | -0.317  | 143 | 154 |
| IP100910458 | Heterogeneous nuclear ribonucleoprotein K                                                | GGDLMyDRR                    | 1000               | 2.827 | 617.2578732 | 2 | -0.00101  | -0.615  | 293 | 302 |
| IP100910458 | Heterogeneous nuclear ribonucleoprotein K                                                | GGDLMyDR                     | 1000               | 2.114 | 539.2075192 | 2 | -0.000613 | -0.569  | 293 | 301 |
| IP100910458 | Heterogeneous nuclear ribonucleoprotein K                                                | RyDDMSPR                     | 160.79             | 2.001 | 617.7315671 | 2 | -0.00122  | -0.986  | 254 | 262 |
| IP100910458 | Heterogeneous nuclear ribonucleoprotein K                                                | DyDDMSPR                     | 137.37             | 2.623 | 539.6814572 | 2 | -0.000337 | -0.313  | 255 | 262 |
| IP100910458 | Heterogeneous nuclear ribonucleoprotein K                                                | GGDLMyDRR                    | 1,000.00, 1,000.00 | 1.079 | 625.255737  | 2 | -0.000193 | -0.154  | 293 | 302 |
| IP100910458 | Heterogeneous nuclear ribonucleoprotein K                                                | IPTLEyQHyK                   | 49.77              | 1.351 | 538.5921627 | 3 | -0.000989 | -0.613  | 104 | 115 |
| IP100418471 | Vimentin                                                                                 | TySLGSLRPSTSR                | 26.2               | 1.747 | 525.9230342 | 3 | 0.000226  | 0.144   | 37  | 50  |
| IP100418471 | Vimentin                                                                                 | SLyASSPQyYATR                | 57.17              | 3.139 | 754.8434445 | 2 | 0.000437  | 0.29    | 51  | 64  |
| IP100418471 | Vimentin                                                                                 | FANyDKyR                     | 1000               | 2.209 | 402.5288692 | 2 | -0.00107  | -0.887  | 114 | 122 |
| IP100418471 | Vimentin                                                                                 | SyVTTSTR                     | 27.96              | 2.098 | 497.7161557 | 2 | -0.00014  | -0.141  | 29  | 36  |
| IP101015591 | cDNA FLJ55635, highly similar to pre-mRNA-splicing factorATP-dependent RNA hLRLDGEDyPSGK |                              | 27.96              | 2.332 | 637.2709598 | 2 | -0.00146  | -1.15   | 7   | 17  |
| IP101015591 | cDNA FLJ55635, highly similar to pre-mRNA-splicing factorATP-dependent RNA hLRLDGEDyPSGK |                              | 89.54              | 5.078 | 522.903442  | 3 | -0.000951 | -0.607  | 5   | 17  |
| IP101015591 | cDNA FLJ55635, highly similar to pre-mRNA-splicing factorATP-dependent RNA hTEMQDNTyPEIL |                              | 30.97              | 1.968 | 845.3630978 | 2 | -0.00136  | -0.802  | 481 | 493 |
| IP101015591 | cDNA FLJ55635, highly similar to pre-mRNA-splicing factorATP-dependent RNA hLQSKySYQ     |                              | 26.2               | 2.691 | 613.2614743 | 2 | 0.000897  | 0.732   | 776 | 784 |
| IP101015591 | cDNA FLJ55635, highly similar to pre-mRNA-splicing factorATP-dependent RNA hLRLDGEDyPSGK |                              | 81.07              | 2.484 | 424.4529414 | 4 | -0.00234  | -1.38   | 5   | 18  |
| IP100031812 | Nuclease-sensitive element-binding protein 1                                             | RRFPyMR                      | 1,000.00, 1,000.00 | 1.488 | 482.3659502 | 3 | -0.00134  | -0.925  | 191 | 199 |
| IP100031812 | Nuclease-sensitive element-binding protein 1                                             | NGyGFNR                      | 1000               | 2.438 | 510.7190854 | 2 | -0.000808 | -0.0792 | 70  | 77  |
| IP100031812 | Nuclease-sensitive element-binding protein 1                                             | RNFyR                        | 1000               | 1.38  | 475.206207  | 2 | 0.000162  | 0.171   | 283 | 288 |
| IP100031812 | Nuclease-sensitive element-binding protein 1                                             | RPQySNPQyQyVEGADNQyGAEQGRFO  | 6.132              | 4.132 | 836.6300044 | 4 | -0.000394 | -0.116  | 205 | 224 |
| IP100006025 | Isoform 1 of Squamous cell carcinoma antigen recognized by T-cells 3                     | GyYVEFKK                     | 1,000.00, 1,000.00 | 2.938 | 806.2960812 | 2 | -0.000059 | -0.0533 | 747 | 757 |
| IP100006025 | Isoform 1 of Squamous cell carcinoma antigen recognized by T-cells 3                     | GyYVEFKK                     | 39.54              | 1.777 | 511.2110897 | 3 | -0.000473 | -0.309  | 747 | 757 |
| IP100006025 | Isoform 1 of Squamous cell carcinoma antigen recognized by T-cells 3                     | GyYVEFK                      | 116.83             | 2.237 | 573.2230221 | 2 | 0.000327  | 0.286   | 747 | 754 |
| IP100006025 | Isoform 1 of Squamous cell carcinoma antigen recognized by T-cells 3                     | LVNRAQPK                     | 1000               | 0.939 | 582.3193356 | 2 | 0.00052   | 0.447   | 832 | 841 |
| IP100006025 | Isoform 1 of Squamous cell carcinoma antigen recognized by T-cells 3                     | AVAAATyK                     | 30.97              | 1.839 | 437.7073361 | 2 | -0.000679 | -0.777  | 42  | 49  |
| IP100418313 | interleukin enhancer-binding factor 3 isoform d                                          | NADHSMNyQR                   | 97.75              | 3.355 | 739.796628  | 2 | -0.000826 | -0.559  | 888 | 898 |
| IP100418313 | interleukin enhancer-binding factor 3 isoform d                                          | NADHSMNyQR                   | 101.03, 129.88     | 3.329 |             |   |           |         |     |     |

|             |                                                                                              |                                     |                    |       |             |   |            |           |      |      |
|-------------|----------------------------------------------------------------------------------------------|-------------------------------------|--------------------|-------|-------------|---|------------|-----------|------|------|
| IP100418313 | interleukin enhancer-binding factor 3 isoform d                                              | AyAALALEK                           | 1000               | 3.098 | 550.7736203 | 2 | 0.000089   | 0.0809    | 582  | 591  |
| IP100376317 | Isoform 1 of Enhancer of mRNA-decapping protein 4                                            | SLAFHRPvLLQQR                       | 180.21             | 2.113 | 648.3316036 | 3 | -0.00147   | -0.754    | 855  | 869  |
| IP100218435 | Isoform 2 of U4/U6 small nuclear ribonucleoprotein Prp4                                      | KPHlyYGSLEEKER                      | 63.6               | 5.829 | 457.9715877 | 4 | -0.000751  | -0.411    | 26   | 39   |
| IP100218435 | Isoform 2 of U4/U6 small nuclear ribonucleoprotein Prp4                                      | LWIAAySLPR                          | 0                  | 1.995 | 656.8275754 | 2 | 0.0018     | 1.37      | 178  | 187  |
| IP100218435 | Isoform 2 of U4/U6 small nuclear ribonucleoprotein Prp4                                      | KPHlyYGSLEEK                        | 74.96              | 4.536 | 515.2452999 | 3 | 0.000323   | 0.209     | 26   | 37   |
| IP100218435 | Isoform 2 of U4/U6 small nuclear ribonucleoprotein Prp4                                      | KPHlyYGSLEEKER                      | 53.24, 59.15       | 2.645 | 636.9483028 | 3 | -0.0007    | -0.367    | 26   | 39   |
| IP100218435 | Isoform 2 of U4/U6 small nuclear ribonucleoprotein Prp4                                      | SKEEYQYTWYHGGNSLX                   | 93.29              | 4.453 | 768.6705318 | 3 | 0.00157    | -0.686    | 157  | 174  |
| IP100414676 | Heat shock protein HSP 90-beta                                                               | DNSTMGvMMAK                         | 90.37              | 2.133 | 664.7395016 | 2 | -0.00155   | -1.17     | 613  | 623  |
| IP100414676 | Heat shock protein HSP 90-beta                                                               | EkyJDQEELNK                         | 1000               | 1.759 | 744.8349606 | 2 | -0.00043   | -0.289    | 274  | 284  |
| IP100414676 | Heat shock protein HSP 90-beta                                                               | EDQTEYLEER                          | 60.18              | 1.908 | 696.2721554 | 2 | -0.000441  | -0.317    | 187  | 196  |
| IP100784295 | Isoform 1 of Heat shock protein HSP 90-alpha                                                 | DNSTMGvMAAK                         | 56.2               | 2.084 | 634.738342  | 2 | -0.000468  | -0.369    | 621  | 631  |
| IP100784295 | Isoform 1 of Heat shock protein HSP 90-alpha                                                 | HyYITGETK                           | 53.98              | 3.959 | 652.8001706 | 2 | -0.00041   | -0.315    | 490  | 499  |
| IP100470590 | splicing factor 3A subunit 1 isoform 2                                                       | ASKLPPAPAPvDELYVSPITGEGK            | 53.24              | 2.474 | 819.7496334 | 3 | 0.00102    | 0.417     | 332  | 354  |
| IP100470590 | splicing factor 3A subunit 1 isoform 2                                                       | FNFLNRPDPvHAYYR                     | 57.6               | 2.606 | 670.9569698 | 3 | 0.00133    | 0.663     | 81   | 95   |
| IP100470590 | splicing factor 3A subunit 1 isoform 2                                                       | ASKLPPAPAPvDELYVSPITGEGKIPASK       | 30.66              | 4.321 | 739.1386714 | 4 | -0.00202   | -0.683    | 332  | 359  |
| IP100470590 | splicing factor 3A subunit 1 isoform 2                                                       | EKQSDVDEVPvAGLDIESLK                | 53.4               | 2.917 | 768.3494869 | 3 | -0.000716  | -0.311    | 383  | 402  |
| IP100015924 | Isoform 1 of Tuffelin-interacting protein 11                                                 | VvYYSQISIKH                         | 24.95              | 3.25  | 485.5504451 | 3 | 0.0000588  | 0.0404    | 278  | 288  |
| IP100015924 | Isoform 1 of Tuffelin-interacting protein 11                                                 | YsYkVTEELK                          | 49.9               | 2.671 | 670.3129269 | 2 | -0.000698  | -0.521    | 238  | 247  |
| IP100015924 | Isoform 1 of Tuffelin-interacting protein 11                                                 | EQKYVYYSQISIKH                      | 16.69              | 2.103 | 460.7135005 | 4 | -0.0013    | -0.706    | 275  | 288  |
| IP100015924 | Isoform 1 of Tuffelin-interacting protein 11                                                 | VvYYSQISIKH                         | 70.16, 50.64       | 3.072 | 512.205627  | 2 | -0.000727  | -0.474    | 278  | 288  |
| IP100015924 | Isoform 1 of Tuffelin-interacting protein 11                                                 | RKDFQvEAMQR                         | 1000               | 2.213 | 560.914376  | 3 | -0.00196   | -1.17     | 740  | 751  |
| IP100015924 | Isoform 1 of Tuffelin-interacting protein 11                                                 | EQKYVYYSQISIKH                      | 27.96, 27.96       | 2.708 | 604.6050411 | 3 | 0.00132    | 0.685     | 275  | 288  |
| IP100015924 | Isoform 1 of Tuffelin-interacting protein 11                                                 | KDFQvEAMQR                          | 1000               | 2.376 | 508.878265  | 3 | -0.000382  | -0.25     | 741  | 751  |
| IP100939523 | DEAD (Asp-Glu-Ala-Asp) box polypeptide 46, isoform CRA_a                                     | LQNSvQPTNK                          | 30.97              | 1.985 | 636.7848508 | 2 | -0.00075   | -0.589    | 1017 | 1026 |
| IP100939523 | DEAD (Asp-Glu-Ala-Asp) box polypeptide 46, isoform CRA_a                                     | LnyVPLEK                            | 1000               | 3.467 | 528.2631222 | 2 | 0.000493   | 0.467     | 909  | 916  |
| IP100939523 | DEAD (Asp-Glu-Ala-Asp) box polypeptide 46, isoform CRA_a                                     | GyAYvTTFEDQAR                       | 67.96              | 2.741 | 807.845947  | 2 | -0.000158  | -0.0976   | 717  | 729  |
| IP100939523 | DEAD (Asp-Glu-Ala-Asp) box polypeptide 46, isoform CRA_a                                     | LnyVPLEKvQEEER                      | 1000               | 1.433 | 863.906738  | 2 | 0.000224   | 0.13      | 909  | 921  |
| IP100939523 | DEAD (Asp-Glu-Ala-Asp) box polypeptide 46, isoform CRA_a                                     | AGNKvGYvTTFEDQAR                    | 70.16              | 3.772 | 662.2985836 | 3 | -0.000626  | -0.315    | 713  | 729  |
| IP100939523 | DEAD (Asp-Glu-Ala-Asp) box polypeptide 46, isoform CRA_a                                     | LnyVPLEKvQEEERvQGGNESFK             | 183.99             | 3.193 | 705.0742183 | 4 | -0.000129  | -0.0456   | 909  | 919  |
| IP101013815 | cDNA FLJ54736, highly similar to Scaffold attachment factor B                                | DDAYvWPEAK                          | 1000               | 3.227 | 587.7268674 | 2 | -0.000168  | -0.0143   | 469  | 477  |
| IP101013815 | cDNA FLJ54736, highly similar to Scaffold attachment factor B                                | cyGvTMTvSTAEATK                     | 207.76, 1,000.00   | 2.354 | 895.8553464 | 2 | 0.000961   | 0.537     | 198  | 212  |
| IP101013815 | cDNA FLJ54736, highly similar to Scaffold attachment factor B                                | cyGvTMTvSTAEATK                     | 233.67             | 4.448 | 887.857174  | 2 | -0.000462  | -0.26     | 198  | 212  |
| IP100013830 | SNW domain-containing protein 1                                                              | AADKLvPAQyIR                        | 1000               | 2.013 | 466.2379146 | 3 | -0.00103   | -0.739    | 167  | 178  |
| IP100013830 | SNW domain-containing protein 1                                                              | LAPAQyIR                            | 1000               | 1.949 | 506.2553097 | 2 | -0.000132  | -0.131    | 171  | 178  |
| IP100013830 | SNW domain-containing protein 1                                                              | LAEALvIADRK                         | 1000               | 3.613 | 671.8421628 | 2 | -0.000826  | -0.615    | 287  | 297  |
| IP100013830 | SNW domain-containing protein 1                                                              | TSNEvYQvDQR                         | 175.49             | 2.123 | 660.2672116 | 2 | -0.000328  | -0.249    | 401  | 410  |
| IP100013830 | SNW domain-containing protein 1                                                              | DKVlySK                             | 53.98              | 1.858 | 466.7283017 | 2 | -0.000748  | -0.802    | 109  | 115  |
| IP100782992 | Isoform 1 of Serine/arginine repetitive matrix protein 2                                     | GERPDvKGEELER                       | 1000               | 2.67  | 553.2458492 | 3 | -0.000629  | -0.379    | 31   | 43   |
| IP100782992 | Isoform 1 of Serine/arginine repetitive matrix protein 2                                     | VPLSAvER                            | 77.86              | 2.285 | 507.736633  | 2 | -0.000686  | -0.676    | 2385 | 2392 |
| IP100782992 | Isoform 1 of Serine/arginine repetitive matrix protein 2                                     | GSvGTNGvVQR                         | 51.44              | 1.423 | 559.7351071 | 2 | -0.000837  | -0.749    | 121  | 129  |
| IP100782992 | Isoform 1 of Serine/arginine repetitive matrix protein 2                                     | RGERPDvKGEELER                      | 1000               | 3.801 | 454.2111507 | 4 | -0.0025    | -1.38     | 30   | 43   |
| IP100782992 | Isoform 1 of Serine/arginine repetitive matrix protein 2                                     | FQSDSSvPYvDvSNLLGQSR                | 30.97              | 5.186 | 1178.012207 | 2 | 0.00236    | 1         | 1138 | 1158 |
| IP100782992 | Isoform 1 of Serine/arginine repetitive matrix protein 2                                     | AAFvGISvDvSvYvDvSvFvDvPvQR          | 21.95              | 4.204 | 752.3304439 | 3 | -0.00144   | -0.641    | 137  | 156  |
| IP100782992 | Isoform 1 of Serine/arginine repetitive matrix protein 2                                     | SLSvYvPvER                          | 32.22              | 2.073 | 559.2503047 | 2 | -0.000242  | -0.216    | 2690 | 2698 |
| IP100304925 | Heat shock 70 kDa protein 1A/1B                                                              | MVQEAvKYvKAEDvEQR                   | 1000               | 2.295 | 678.3075557 | 3 | 0.00179    | 0.881     | 518  | 538  |
| IP100304925 | Heat shock 70 kDa protein 1A/1B                                                              | TPvSvVAFTvDTER                      | 61.94              | 2.702 | 784.3381955 | 2 | 0.000339   | 0.217     | 37   | 49   |
| IP100014344 | Isoform Long of Dual specificity tyrosine-phosphorylation-regulated kinase 1A                | TYvYvQvSR                           | 29.21              | 2.086 | 575.7685544 | 2 | -0.000543  | -0.472    | 318  | 325  |
| IP100644386 | Uncharacterized protein                                                                      | IGvDvAGTvSvNSvNDvYvGvYvGvQK         | 62.73              | 2.817 | 1027.429321 | 2 | 0.0000994  | 0.044     | 45   | 64   |
| IP100644386 | Uncharacterized protein                                                                      | AWEEvYK                             | 27.96              | 1.571 | 534.7075803 | 2 | -0.000591  | -0.553    | 585  | 591  |
| IP100644386 | Uncharacterized protein                                                                      | AWEEvYKK                            | 51.06              | 2.295 | 598.7551877 | 2 | -0.000376  | -0.314    | 585  | 592  |
| IP100644386 | Uncharacterized protein                                                                      | AWEEvYKK                            | 1,000.00, 1,000.00 | 1.345 | 638.7380978 | 2 | -0.000887  | -0.695    | 585  | 592  |
| IP100798302 | cDNA FLJ59405, highly similar to Eukaryotic translation initiation factor 4B                 | ARvPATvDvSvDvDvPPR                  | 163.22             | 3.552 | 563.2423702 | 3 | -0.000466  | -0.276    | 162  | 175  |
| IP100889791 | cDNA FLJ31224 fs, clone KIDNE2004305, highly similar to ATP-dependent DNA HELvYvDvYvDvYvPEGK | KQvYvENvLcLcLR                      | 110.19             | 2.393 | 800.8502194 | 2 | -0.00121   | -0.758    | 486  | 498  |
| IP100922484 | cDNA, FLJ79376, highly similar to Protein G10 homolog                                        | KQvYvENvLcLcLR                      | 1000               | 2.115 | 760.8231198 | 2 | -0.000843  | -0.554    | 94   | 104  |
| IP100922484 | cDNA, FLJ79376, highly similar to Protein G10 homolog                                        | QvYvENvLcLcLR                       | 1000               | 3.458 | 696.7581176 | 2 | -0.000447  | -0.321    | 95   | 104  |
| IP100479786 | Isoform 1 of Far upstream element-binding protein 2                                          | ERvDvQvGvFvDvRvNEvYvGvSR            | 37.97              | 3.394 | 641.598022  | 3 | -0.0000105 | -0.000544 | 305  | 320  |
| IP100479786 | Isoform 1 of Far upstream element-binding protein 2                                          | DvQvGvFvDvRvNEvYvGvSR               | 18.95              | 2.113 | 546.5498653 | 3 | -0.000781  | -0.477    | 307  | 312  |
| IP100955965 | Isoform 2 of Ubiquitin carboxyl-terminal hydrolase 10                                        | RPPvGvYSYLK                         | 0                  | 2.493 | 662.3114621 | 2 | 0.000117   | 0.886     | 203  | 220  |
| IP100955965 | Isoform 2 of Ubiquitin carboxyl-terminal hydrolase 10                                        | KKRvPvGvYSYLK                       | 0                  | 1.836 | 527.2728878 | 3 | -0.000913  | -0.578    | 201  | 212  |
| IP100955965 | Isoform 2 of Ubiquitin carboxyl-terminal hydrolase 10                                        | KRvPvGvYSYLK                        | 65.93              | 3.053 | 484.5747066 | 3 | -0.000457  | -0.315    | 202  | 212  |
| IP100290204 | Isoform 1 of U1 small nuclear ribonucleoprotein 70 kDa                                       | HHNvQvYvGvIvPvTR                    | 165.76             | 2.972 | 452.2037044 | 4 | -0.00345   | -1.91     | 33   | 46   |
| IP100290204 | Isoform 1 of U1 small nuclear ribonucleoprotein 70 kDa                                       | GvYvAFvIEvHEvR                      | 217.31             | 2.57  | 498.5415645 | 3 | -0.00118   | -0.792    | 145  | 155  |
| IP100290204 | Isoform 1 of U1 small nuclear ribonucleoprotein 70 kDa                                       | DDvTSvRvDvRvPvSvPLvPvHR             | 0                  | 4.374 | 544.4964595 | 4 | 0.0000363  | 0.0167    | 214  | 231  |
| IP100183500 | Isoform 1 of Nuclear cap-binding protein subunit 2                                           | DEvYvRvDvYvDvAGR                    | 95.21              | 2.132 | 489.8567196 | 3 | 0.000182   | 0.124     | 136  | 146  |
| IP100183500 | Isoform 1 of Nuclear cap-binding protein subunit 2                                           | SDSvYvVELSvYvQR                     | 24.95              | 3.645 | 476.201324  | 2 | -0.000804  | -0.564    | 11   | 21   |
| IP100183500 | Isoform 1 of Nuclear cap-binding protein subunit 2                                           | SDSvYvVELSvYvQRvDvGvYvQR            | 44.63, 17.99       | 3.455 | 730.6281124 | 3 | -0.000771  | -0.352    | 11   | 26   |
| IP100183500 | Isoform 1 of Nuclear cap-binding protein subunit 2                                           | DEvYvRvDvYvDvAGRvGvHvK              | 18.95              | 1.976 | 643.9307857 | 3 | -0.000419  | -0.217    | 136  | 151  |
| IP100477686 | General transcription factor IIF subunit 2                                                   | AEvRvPAvSENvYvMR                    | 91.01              | 4.62  | 545.5535884 | 3 | -0.000477  | -0.292    | 114  | 126  |
| IP100477686 | General transcription factor IIF subunit 2                                                   | AEvRvPAvSENvYvMR                    | 79.56, 1,000.00    | 2.57  | 550.8848873 | 3 | -0.0015    | -0.906    | 114  | 126  |
| IP100477686 | General transcription factor IIF subunit 2                                                   | HvYvYvNvLK                          | 48.87              | 2.897 | 523.2293698 | 2 | 0.0000881  | 0.0842    | 194  | 200  |
| IP100396378 | Isoform B1 of Heterogeneous nuclear ribonucleoproteins A2/B1                                 | NMGvPvGvGGvNvYvGvGGvSvGGvYvGvR      | 100.79             | 3.122 | 1135.440796 | 2 | 0.00114    | 0.502     | 326  | 350  |
| IP100396378 | Isoform B1 of Heterogeneous nuclear ribonucleoproteins A2/B1                                 | NvYvEQvGvK                          | 58.42              | 2.645 | 584.2290646 | 2 | -0.000922  | -0.79     | 39   | 46   |
| IP100396378 | Isoform B1 of Heterogeneous nuclear ribonucleoproteins A2/B1                                 | YvHTvNGvHvAEvR                      | 37.97              | 3.116 | 497.5590768 | 3 | -0.00205   | -1.38     | 174  | 185  |
| IP100396378 | Isoform B1 of Heterogeneous nuclear ribonucleoproteins A2/B1                                 | GvFGvDvGvYvGvGGvGvNvGvGGvSvGGvYvGvR | 23.2               | 2.609 | 859.0067134 | 3 | -0.00244   | -0.946    | 239  | 266  |
| IP100396378 | Isoform B1 of Heterogeneous nuclear ribonucleoproteins A2/B1                                 | NMGvPvGvGGvNvYvGvGGvSvGGvYvGvR      | 1,000.00, 48.16    | 2.865 | 762.627502  | 3 | -0.000686  | -0.3      | 326  | 350  |
| IP100397358 | Ribosomal protein S27                                                                        | LVvQvSvNvSvYvFvMvDvK                | 27.96              | 2.948 | 804.3626706 | 2 | -0.00061   | -0.38     | 88   | 100  |
| IP100397358 | Ribosomal protein S27                                                                        | RLvQvSvNvSvYvFvMvDvK                | 30.97, 1,000.00    | 3.154 | 812.3600461 | 2 | -0.000774  | -0.477    | 88   | 100  |
| IP100397358 | Ribosomal protein S27                                                                        | RLvQvSvNvSvYvFvMvDvK                | 23.2               | 2.969 | 588.6114498 | 3 | -0.000527  | -0.299    | 87   | 100  |
| IP100056880 | Zinc finger protein 787                                                                      | RvHTvGvEKvYvAcLEvGvKvR              | 63.76              | 3.213 | 539.5037227 | 4 | -0.00304   | -1.41     | 114  | 130  |
| IP100056880 | Zinc finger protein 787                                                                      | IvHTvGvEKvYvAcLEvGvKvR              | 142.11             | 5.483 | 500.479156  | 4 | -0.000208  | -0.104    | 115  | 130  |
| IP100056880 | Zinc finger protein 787                                                                      | RvAPvAKvYvAcLEvGvKvR                | 1000               | 3.264 | 609.2877193 | 3 | -0.00215   | -1.18     | 273  | 287  |
| IP100056880 | Zinc finger protein 787                                                                      | IvHTvGvEKvYvAcLEvGvKvR              | 82.96              | 3.014 | 614.9357906 | 3 | -0.000535  | -0.291    | 115  | 129  |
| IP100056880 | Zinc finger protein 787                                                                      | APvAPkYvAcLEvGvKvR                  | 1000               | 2.256 | 557.2543331 | 3 | -0.00121   | -0.723    | 274  |      |

|             |                                                                   |                        |                    |       |             |   |            |         |      |      |
|-------------|-------------------------------------------------------------------|------------------------|--------------------|-------|-------------|---|------------|---------|------|------|
| IP100979518 | Uncharacterized protein                                           | HELQANCYEVEKDR         | 1000               | 2.625 | 624.2649532 | 3 | -0.000382  | -0.204  | 133  | 146  |
| IP100979518 | Uncharacterized protein                                           | LTGIKHELQANCYEVEK      | 151.67             | 2.167 | 704.66748   | 3 | 0.0029     | 1.37    | 128  | 144  |
| IP100979518 | Uncharacterized protein                                           | HELQANCYEVEK           | 1000               | 1.963 | 533.8887935 | 3 | -0.000761  | -0.476  | 133  | 144  |
| IP100220381 | Isoform 2 of Transcription factor 20                              | SFYPIHVVNK             | 42.24              | 3.179 | 482.8988338 | 3 | -0.00138   | -0.951  | 1630 | 1640 |
| IP100220381 | Isoform 2 of Transcription factor 20                              | QINLTDYPIPR            | 60.18              | 2.979 | 705.3450314 | 2 | -0.000989  | -0.701  | 833  | 843  |
| IP100220381 | Isoform 2 of Transcription factor 20                              | SPSQYHDFAEK            | 54.52              | 1.752 | 463.5233384 | 3 | -0.00106   | -0.764  | 1005 | 1015 |
| IP100220381 | Isoform 2 of Transcription factor 20                              | GRSPSQYHDFAEK          | 59.15              | 2.109 | 534.5633541 | 3 | -0.000614  | -0.384  | 1003 | 1015 |
| IP100104050 | Thyroid hormone receptor-associated protein 3                     | yyLHDDR                | 1,000.00, 1,000.00 | 1.813 | 571.191528  | 2 | -0.000527  | -0.462  | 880  | 886  |
| IP100104050 | Thyroid hormone receptor-associated protein 3                     | SGKWEGLVYAPPGKEK       | 165.96             | 4.325 | 609.3014522 | 3 | -0.00052   | -0.285  | 468  | 483  |
| IP100104050 | Thyroid hormone receptor-associated protein 3                     | NREEEDPEYTPK           | 67.96              | 2.483 | 886.8619382 | 2 | -0.000975  | -0.55   | 864  | 876  |
| IP100104050 | Thyroid hormone receptor-associated protein 3                     | ASESSKPWPDATYGTCSASR   | 27.96              | 4.796 | 712.3076778 | 3 | -0.000943  | -0.442  | 216  | 235  |
| IP100104050 | Thyroid hormone receptor-associated protein 3                     | SNWQNYR                | 156.95             | 1.877 | 524.2064816 | 2 | 0.000312   | 0.298   | 109  | 115  |
| IP100007928 | Pre-mRNA-processing-splicing factor 8                             | ETGYTYLLK              | 30.97              | 1.942 | 632.7969968 | 2 | -0.00058   | -0.52   | 2099 | 2108 |
| IP100007928 | Pre-mRNA-processing-splicing factor 8                             | HLIYYR                 | 52.4               | 2.045 | 472.7233884 | 2 | -0.000575  | -0.609  | 610  | 615  |
| IP100007928 | Pre-mRNA-processing-splicing factor 8                             | TNHLVSSDDIK            | 41.76              | 1.605 | 491.2205806 | 3 | -0.00103   | -0.703  | 2087 | 2098 |
| IP100007928 | Pre-mRNA-processing-splicing factor 8                             | HGDEITSTTSNYETQTFSK    | 53.49              | 5.041 | 809.3517452 | 3 | -0.000641  | -0.264  | 2050 | 2070 |
| IP100908896 | Uncharacterized protein                                           | DLNlyfSGMSDHR          | 164.95             | 3.327 | 561.2097774 | 3 | -0.00041   | -0.244  | 263  | 275  |
| IP100908896 | Uncharacterized protein                                           | DLNlyfSGMSDHR          | 127.58, 1,000.00   | 2.345 | 566.5412593 | 3 | -0.000879  | -0.518  | 263  | 275  |
| IP100939124 | Uncharacterized protein                                           | SSGSPYGGYGGGGGGGGyGSR  | 0                  | 3.825 | 995.8823849 | 3 | -0.0000817 | -0.041  | 321  | 342  |
| IP100939124 | Uncharacterized protein                                           | IFVGGIKEDTEEYNLR       | 60.5               | 4.427 | 654.9785762 | 3 | -0.00155   | -0.789  | 128  | 143  |
| IP100939124 | Uncharacterized protein                                           | KIFVGGIKEDTEEYNLR      | 48.63              | 4.614 | 697.6770626 | 3 | -0.00109   | -0.521  | 127  | 143  |
| IP100939124 | Uncharacterized protein                                           | EDTEEYNLR              | 50.19              | 1.575 | 624.7428586 | 2 | -0.000734  | -0.588  | 135  | 143  |
| IP100939124 | Uncharacterized protein                                           | EDTEEYNLRDyFEK         | 50.51              | 2.063 | 644.2631221 | 3 | -0.00121   | -0.627  | 135  | 148  |
| IP100643041 | GTP-binding nuclear protein Ran                                   | NLQyYDSAK              | 48.87              | 2.189 | 647.7897338 | 2 | -0.000484  | -0.374  | 143  | 152  |
| IP100909378 | cDNA FLJ59219, highly similar to Poly(A)-binding protein 1        | QAHLTNQyMQR            | 43.77              | 1.791 | 490.5503231 | 3 | -0.000807  | -0.549  | 343  | 353  |
| IP100909378 | cDNA FLJ59219, highly similar to Poly(A)-binding protein 1        | TVPPQK                 | 105.44             | 1.271 | 408.188934  | 2 | -0.000484  | -0.593  | 475  | 480  |
| IP100909378 | cDNA FLJ59219, highly similar to Poly(A)-binding protein 1        | IVATKPLVALAQR          | 74.45              | 2.182 | 481.9550778 | 2 | -0.0013    | -0.799  | 325  | 338  |
| IP100790636 | HLA-B associated transcript 1                                     | GSYVSHSSGFR            | 0                  | 1.958 | 688.8031613 | 3 | -0.00143   | -1.04   | 37   | 48   |
| IP100790636 | HLA-B associated transcript 1                                     | LTLHGLQQYHSSK          | 27.96              | 3.04  | 514.9293819 | 3 | 0.000169   | 0.11    | 257  | 268  |
| IP100395337 | Isoform 1 of Pre-mRNA 3'-end-processing factor FIP1               | QWdYyAR                | 30.97              | 2.389 | 541.2107541 | 2 | -0.000743  | -0.687  | 450  | 456  |
| IP100395337 | Isoform 1 of Pre-mRNA 3'-end-processing factor FIP1               | TGAPQYGSYGTAPVNLNK     | 30.97              | 2.865 | 1023.984375 | 2 | 0.0019     | 0.934   | 105  | 123  |
| IP100395337 | Isoform 1 of Pre-mRNA 3'-end-processing factor FIP1               | QWdYyARR               | 23.2               | 2.268 | 413.1767269 | 3 | -0.000996  | -0.805  | 450  | 457  |
| IP100395337 | Isoform 1 of Pre-mRNA 3'-end-processing factor FIP1               | QWdYyAR                | 1,000.00, 1,000.00 | 1.463 | 581.1941525 | 2 | -0.000278  | -0.239  | 450  | 456  |
| IP100029081 | Isoform Alpha of DNA ligase 3                                     | VNKlyfPFDVFPDK         | 27.96              | 2.683 | 629.9818111 | 3 | -0.000243  | -0.129  | 763  | 777  |
| IP100029081 | Isoform Alpha of DNA ligase 3                                     | 1yPFDVFPDK             | 67.96              | 1.877 | 773.8667599 | 2 | 0.00197    | 1.27    | 766  | 777  |
| IP100023343 | Isoform 1 of Disks large homolog 3                                | RNEVDVQDyHfVFSR        | 236.01             | 5.497 | 672.6251827 | 3 | -0.00143   | -0.709  | 664  | 679  |
| IP100023343 | Isoform 1 of Disks large homolog 3                                | DNEVDVQDyHfVFSR        | 85.89              | 2.72  | 620.5913082 | 3 | -0.00195   | -1.05   | 665  | 679  |
| IP100472724 | Putative elongation factor 1-alpha-like 3                         | EHALLAYTLGVK           | 24.95              | 2.587 | 465.5746151 | 3 | -0.000431  | -0.309  | 135  | 146  |
| IP100472724 | Putative elongation factor 1-alpha-like 3                         | STTTGHLyK              | 172.74             | 2.457 | 400.805648  | 3 | -0.000862  | -0.568  | 21   | 30   |
| IP100916818 | Phosphoglycerate kinase                                           | KELNFAK                | 1000               | 2.409 | 546.7601926 | 2 | -0.000566  | -0.518  | 102  | 109  |
| IP100916818 | Phosphoglycerate kinase                                           | ELNFAK                 | 1000               | 1.691 | 482.7128293 | 2 | -0.000293  | -0.304  | 103  | 109  |
| IP100220918 | Isoform 2 of DNA (cytosine-5)-methyltransferase 1                 | YSDyK                  | 58.82              | 1.499 | 434.6781918 | 2 | -0.000868  | -0.999  | 992  | 997  |
| IP100220918 | Isoform 2 of DNA (cytosine-5)-methyltransferase 1                 | KEPVDDELyPEHYR         | 130.6              | 3.659 | 623.9403072 | 3 | -0.000955  | -0.511  | 977  | 990  |
| IP100220918 | Isoform 2 of DNA (cytosine-5)-methyltransferase 1                 | KYSDyK                 | 107.96             | 2.549 | 498.7256772 | 2 | -0.000897  | -0.9    | 991  | 997  |
| IP100021417 | U4/U6.U5 tri-snRNP-associated protein 1                           | TPyTLVLSGSGK           | 77.86              | 2.748 | 601.2976071 | 2 | 0.000263   | 0.219   | 781  | 791  |
| IP100021417 | U4/U6.U5 tri-snRNP-associated protein 1                           | MAIDDKySR              | 27.96              | 1.728 | 589.7496335 | 2 | -0.000385  | -0.326  | 679  | 687  |
| IP100021417 | U4/U6.U5 tri-snRNP-associated protein 1                           | DDGyEAASSK             | 144.55             | 2.766 | 597.2216183 | 2 | -0.00101   | -0.85   | 99   | 109  |
| IP100021417 | U4/U6.U5 tri-snRNP-associated protein 1                           | RDDGyEAASSK            | 174.94             | 1.775 | 675.2702334 | 2 | -0.00128   | -0.952  | 98   | 109  |
| IP100021417 | U4/U6.U5 tri-snRNP-associated protein 1                           | LASEYLTPPEMFFKK        | 0                  | 4.086 | 655.9812618 | 3 | -0.000491  | -0.25   | 386  | 404  |
| IP100021417 | U4/U6.U5 tri-snRNP-associated protein 1                           | SLPSAVyEDK             | 79.9               | 1.107 | 731.3206174 | 2 | -0.000382  | -0.261  | 667  | 678  |
| IP100021634 | Kinesin light chain 2                                             | AEEVYyYR               | 30.97              | 2.564 | 651.2586056 | 2 | 0.00036    | 0.276   | 340  | 348  |
| IP100453473 | Histone H4                                                        | ISGLyEETR              | 70.88              | 3.416 | 630.797363  | 2 | -0.000926  | -0.734  | 47   | 56   |
| IP100453473 | Histone H4                                                        | RISGLyEETR             | 59.15              | 1.187 | 708.8480221 | 2 | -0.000707  | -0.499  | 46   | 56   |
| IP100453473 | Histone H4                                                        | TVTAMDVVALKR           | 235.22             | 3.606 | 516.2625728 | 3 | 0.00154    | 0.997   | 81   | 93   |
| IP100453473 | Histone H4                                                        | KVTAMDVVALKR           | 315.79             | 3.78  | 558.9600216 | 3 | -0.00111   | -0.664  | 80   | 93   |
| IP100784090 | T-complex protein 1 subunit theta                                 | HFSGLEAVyK             | 151.15             | 2.18  | 463.2064815 | 3 | -0.000932  | -0.672  | 21   | 31   |
| IP100015838 | Cell growth-regulating nuclear protein                            | VLAQyTYTDEHHR          | 54.16              | 5.224 | 604.6093135 | 3 | 0.000464   | 0.256   | 336  | 349  |
| IP100015838 | Cell growth-regulating nuclear protein                            | KVLAQyTYTDEHHR         | 46.67              | 4.094 | 485.7323604 | 3 | -0.00086   | -0.443  | 335  | 349  |
| IP101008793 | RNA-binding protein 10 isoform 5                                  | ESATADAGyALEKK         | 190.74             | 4.144 | 549.5941158 | 3 | -0.00133   | -0.807  | 751  | 765  |
| IP101008793 | RNA-binding protein 10 isoform 5                                  | RPYQMEyERR             | 107.43             | 2.062 | 541.5641475 | 3 | -0.00193   | -1.19   | 61   | 71   |
| IP101008793 | RNA-binding protein 10 isoform 5                                  | ESATADAGyALEK          | 115.81             | 3.365 | 759.8397214 | 2 | -0.00141   | -0.928  | 751  | 764  |
| IP101008793 | RNA-binding protein 10 isoform 5                                  | SRDHDyRMDyR            | 93.27              | 2.288 | 427.9188228 | 4 | -0.00221   | -1.29   | 96   | 107  |
| IP101008793 | RNA-binding protein 10 isoform 5                                  | SRDHDyRMDyR            | 56.55, 101.53      | 2.143 | 596.8782955 | 3 | -0.00112   | -0.627  | 96   | 107  |
| IP100028122 | Isoform 1 of PC4 and SFRS1-interacting protein                    | MKGyPHWPAP             | 1000               | 1.842 | 441.5339656 | 3 | -0.00078   | -0.589  | 15   | 24   |
| IP100793920 | CDV3 homolog (Mouse), isoform CRA_a                               | EDVYSGLR               | 30.97              | 2.024 | 509.7159116 | 2 | -0.000728  | -0.715  | 92   | 99   |
| IP100793920 | CDV3 homolog (Mouse), isoform CRA_a                               | LQLDNQyAVLENLQ         | 1000               | 3.007 | 585.9480587 | 3 | -0.0035    | -1.99   | 238  | 251  |
| IP100793920 | CDV3 homolog (Mouse), isoform CRA_a                               | KTPQQPPEySDTQFPLSQSTAK | 54.16              | 4.94  | 867.4145504 | 3 | -0.000925  | -0.356  | 181  | 203  |
| IP100183626 | polypyrimidine tract-binding protein 1 isoform a                  | GQPyIQFySHK            | 75.44              | 3.201 | 504.5272723 | 3 | -0.00241   | -1.59   | 123  | 134  |
| IP100008530 | 60S acidic ribosomal protein P0                                   | IIQLDDyPK              | 1000               | 3.29  | 649.3265378 | 2 | 0.000424   | 0.327   | 17   | 26   |
| IP100465294 | Cell division cycle 5-like protein                                | ARIWYELDPSIK           | 210.63             | 2.927 | 548.5926509 | 3 | -0.000124  | -0.0753 | 48   | 59   |
| IP100465294 | Cell division cycle 5-like protein                                | DKLNINFDGMDySDPSyVK    | 27.96              | 3.094 | 817.6856685 | 3 | -0.00167   | -0.682  | 446  | 466  |
| IP100465294 | Cell division cycle 5-like protein                                | WyEWLDPSIK             | 138.13             | 2.206 | 708.8171994 | 2 | 0.00235    | 1.66    | 50   | 59   |
| IP100465294 | Cell division cycle 5-like protein                                | ILLGGyQSR              | 46.21              | 2.085 | 543.771301  | 2 | -0.00025   | -0.23   | 719  | 727  |
| IP100465294 | Cell division cycle 5-like protein                                | WyEWLDPSIKK            | 161.44             | 2.23  | 515.5785518 | 3 | 0.000779   | 0.504   | 50   | 60   |
| IP100465294 | Cell division cycle 5-like protein                                | GVDyNAEIPFEK           | 1000               | 3.579 | 731.3190304 | 2 | -0.000191  | -0.13   | 207  | 218  |
| IP100018140 | Isoform 1 of Heterogeneous nuclear ribonucleoprotein Q            | VTEGLTDVILyHQDDKK      | 39.19              | 2.092 | 717.6845089 | 3 | -0.00005   | -0.0232 | 266  | 283  |
| IP100018140 | Isoform 1 of Heterogeneous nuclear ribonucleoprotein Q            | VTEGLTDVILyHQDDKK      | 146.9              | 2.794 | 674.9852291 | 3 | -0.00289   | -1.43   | 266  | 282  |
| IP100018140 | Isoform 1 of Heterogeneous nuclear ribonucleoprotein Q            | LKDyAFHFDER            | 1000               | 2.786 | 545.2520748 | 3 | -0.00115   | -0.705  | 370  | 381  |
| IP100018140 | Isoform 1 of Heterogeneous nuclear ribonucleoprotein Q            | KLKdYAFHFDER           | 1000               | 3.439 | 441.2147517 | 4 | -0.00119   | -0.678  | 369  | 381  |
| IP100018140 | Isoform 1 of Heterogeneous nuclear ribonucleoprotein Q            | SENQEFyQDTFQyQWK       | 43.77              | 2.583 | 705.6220699 | 3 | 0.000733   | 0.347   | 608  | 623  |
| IP100018140 | Isoform 1 of Heterogeneous nuclear ribonucleoprotein Q            | VTEGLTDVILyHQDDKKK     | 153.24             | 3.529 | 570.5385737 | 4 | -0.00211   | -0.924  | 266  | 284  |
| IP100420014 | Isoform 1 of US small nuclear ribonucleoprotein 200 kDa helicase  | MTQNPNyNLQGISHR        | 48.15              | 3.095 | 672.6320797 | 3 | 0.000662   | 0.329   | 1764 | 1779 |
| IP100420014 | Isoform 1 of US small nuclear ribonucleoprotein 200 kDa helicase  | SLQyEYK                | 41.11              | 1.441 | 505.7156064 | 2 | -0.000239  | -0.236  | 8    | 14   |
| IP100420014 | Isoform 1 of US small nuclear ribonucleoprotein 200 kDa helicase  | RMTQNPNyNLQGISHR       | 54.16              | 1.972 | 724.6651607 | 3 | -0.00119   | -0.55   | 1763 | 1779 |
| IP100373877 | Isoform 1 of Zinc finger protein 326                              | FGPYESyDSR             | 23.19              | 2.021 | 650.7481686 | 2 | -0.000214  | -0.165  | 71   | 80   |
| IP100373877 | Isoform 1 of Zinc finger protein 326                              | YDGYR                  | 117.47             | 1.562 | 405.644714  | 2 | -0.000823  | -1.02   | 304  | 309  |
| IP100373877 | Isoform 1 of Zinc finger protein 326                              | NSEKYGdGyR             | 53.49              | 2.027 | 634.7507931 | 2 | -0.00117   | -0.919  | 300  | 309  |
| IP100373877 | Isoform 1 of Zinc finger protein 326                              | NQGGSSWEPySR           | 0                  | 3.051 | 759.8047482 | 2 | 0.000245   | 0.161   | 126  | 138  |
| IP100045914 | Mx2-interacting protein                                           | TLQGLyYASR             | 37.97              | 3.09  | 463.5504146 | 2 | -0.000833  | -0.6    | 177  | 187  |
| IP100045914 | Mx2-interacting protein                                           | VLPySNITVR             | 30.97              | 2.073 | 621.316176  | 2 | -0.001     | -0.805  | 1294 | 1303 |
| IP100045914 | Mx2-interacting protein                                           | LHPyTVPR               | 22.52              | 1.241 | 531.7601926 | 2 | -0.00127   | -1.19   | 3186 | 3193 |
| IP100045914 | Mx2-interacting protein                                           | NKPySFALDK             | 24.95              | 2.476 | 656.8028561 | 2 | -0.0000393 | -0.0299 | 1429 | 1438 |
| IP100045914 | Mx2-interacting protein                                           | DyRDDITR               | 116.16             | 1.911 | 416.1871029 | 3 | -0.00147   | -1.18   | 218  | 226  |
| IP100045914 | Mx2-interacting protein                                           | SyVATMGDHENR           | 51.95              | 2.447 | 487.1945797 | 3 | 0.000362   | 0.248   | 1906 | 1917 |
| IP100045914 | Mx2-interacting protein                                           | ASALyESSR              | 54.16              | 2.254 | 532.2268062 | 2 | -0.000239  | -0.225  | 1395 | 1403 |
| IP101014931 | cDNA FLJ55677, highly similar to DNA mismatch repair protein MSH6 | QSTLYSFFPK             | 30.97              | 3.114 | 649.2978512 | 2 | 0.000851   | 0.656   | 4    | 13   |
| IP101014931 | cDNA FLJ55677, highly similar to DNA mismatch repair protein MSH6 | AIMyEETYSK             | 88.93              | 2.34  | 708.294006  | 2 | -0.000439  | -0.31   |      |      |

|             |                                                                                            |                     |                    |             |             |           |            |         |      |      |
|-------------|--------------------------------------------------------------------------------------------|---------------------|--------------------|-------------|-------------|-----------|------------|---------|------|------|
| IP101014931 | cDNA FLJ55677, highly similar to DNA mismatch repair protein MSH6                          | GQTQYSLVLEGPSENYK   | 30.97              | 3.004       | 1027.934082 | 2         | -0.000612  | 0.298   | 390  | 407  |
| IP100219420 | Structural maintenance of chromosomes protein 3                                            | GALTTGGYDTRK        | 26.2               | 1.629       | 691.3115842 | 2         | -0.000183  | -0.133  | 662  | 673  |
| IP100219430 | Structural maintenance of chromosomes protein 3                                            | SNPYIVK             | 24.95              | 1.676       | 532.2469479 | 2         | -0.000456  | -0.428  | 133  | 140  |
| IP100219420 | Structural maintenance of chromosomes protein 3                                            | GALTTGGYDTR         | 27.96              | 2.791       | 627.2637936 | 2         | -0.000764  | -0.61   | 662  | 672  |
| IP100219420 | Structural maintenance of chromosomes protein 3                                            | LHTLEEKEELAGYQK     | 108.43             | 2.296       | 689.9934078 | 3         | 0.000347   | 0.168   | 200  | 215  |
| IP100479209 | cDNA FLJ54590, highly similar to KH domain-containing, RNA-binding, signalranGAYREHPYGR    | 140.13              | 1.864              | 483.5416866 | 3           | -0.00182  | -1.25      | 413     | 423  |      |
| IP100479209 | cDNA FLJ54590, highly similar to KH domain-containing, RNA-binding, signalranGAYREHPYGR    | 134.61              | 2.353              | 429.187408  | 3           | -0.00135  | -1.05      | 413     | 422  |      |
| IP100479209 | cDNA FLJ54590, highly similar to KH domain-containing, RNA-binding, signalranKDEENYLDLFSHK | 287.14              | 5.053              | 611.5964351 | 3           | -0.000971 | -0.53      | 119     | 132  |      |
| IP100337315 | Isoform 1 of E3 ubiquitin-protein ligase RBBP6                                             | EDYVGGQSHR          | 167.84             | 2.401       | 409.8311458 | 3         | -0.00184   | -1.5    | 881  | 890  |
| IP100337315 | Isoform 1 of E3 ubiquitin-protein ligase RBBP6                                             | NVPQGETEREYFNR      | 47.5               | 1.548       | 606.9319454 | 3         | -0.00104   | -0.572  | 785  | 798  |
| IP100337315 | Isoform 1 of E3 ubiquitin-protein ligase RBBP6                                             | AMMSQSGHEYDIPNYMK   | 30.38              | 2.418       | 694.6114498 | 3         | 0.00137    | 0.659   | 133  | 149  |
| IP100337315 | Isoform 1 of E3 ubiquitin-protein ligase RBBP6                                             | EEFYREQR            | 1000               | 1.573       | 412.8400264 | 3         | -0.000597  | -0.483  | 639  | 646  |
| IP100337315 | Isoform 1 of E3 ubiquitin-protein ligase RBBP6                                             | DRDYVLEKENPEK       | 0                  | 3.014       | 601.2718502 | 3         | -0.00123   | -0.68   | 1405 | 1418 |
| IP100337315 | Isoform 1 of E3 ubiquitin-protein ligase RBBP6                                             | TKDRDYSVLEK         | 0                  | 1.404       | 478.5610347 | 3         | -0.000472  | -0.329  | 1403 | 1413 |
| IP100337315 | Isoform 1 of E3 ubiquitin-protein ligase RBBP6                                             | LGVLVSPQQIR         | 203.88             | 1.89        | 725.8770138 | 2         | 0.0000761  | 0.0525  | 511  | 522  |
| IP100410040 | Isoform 2 of Periphilin-1                                                                  | yySHVDYR            | 50.64, 58.42       | 2.697       | 631.7178952 | 2         | -0.000393  | -0.311  | 59   | 66   |
| IP100410040 | Isoform 2 of Periphilin-1                                                                  | SFYSYHYAR           | 53.98              | 1.677       | 599.2399289 | 2         | -0.000794  | -0.663  | 117  | 125  |
| IP100410040 | Isoform 2 of Periphilin-1                                                                  | YeyERIPR            | 66.42              | 1.688       | 402.5165706 | 3         | -0.00156   | -1.3    | 14   | 21   |
| IP100410040 | Isoform 2 of Periphilin-1                                                                  | KSFYSYHYAR          | 0                  | 2.556       | 442.5279232 | 3         | 0.000293   | 0.221   | 116  | 125  |
| IP100410040 | Isoform 2 of Periphilin-1                                                                  | RDEMWSGREGYER       | 41.47              | 2.29        | 662.5999141 | 3         | -0.00123   | -0.622  | 5    | 18   |
| IP100410040 | Isoform 2 of Periphilin-1                                                                  | YySHVDYR            | 27.96              | 2.971       | 591.7350461 | 2         | 0.000241   | 0.203   | 59   | 66   |
| IP100220740 | Isoform 2 of Nucleophosmin                                                                 | ADKDYHFVNDNEHQSLSR  | 391.76             | 6.963       | 664.047668  | 4         | -0.00143   | -0.539  | 25   | 45   |
| IP100220740 | Isoform 2 of Nucleophosmin                                                                 | FINYK               | 1000               | 1.414       | 432.2069089 | 2         | -0.000834  | -0.966  | 239  | 244  |
| IP100917575 | cDNA FLJ51046, highly similar to 60 kDa heat shock protein, mitochondrial                  | CEFDQAYVLLSEKK      | 176.23             | 3.123       | 603.9426876 | 3         | -0.00118   | -0.652  | 181  | 194  |
| IP100917575 | cDNA FLJ51046, highly similar to 60 kDa heat shock protein, mitochondrial                  | GYSYPIFNTSK         | 81.61              | 2.062       | 735.3400876 | 2         | 0.000524   | 0.356   | 166  | 177  |
| IP100797230 | 32 kDa protein                                                                             | ASGNyATVISHNPETK    | 83.7               | 5.467       | 590.2689205 | 3         | 0.000385   | 0.218   | 129  | 144  |
| IP100797230 | 32 kDa protein                                                                             | ASGNyATVISHNPETK    | 59.15              | 4.52        | 632.9665523 | 3         | -0.00172   | -0.907  | 129  | 145  |
| IP100007941 | Protein HEXIM1                                                                             | HWKPYKLTWEEK        | 67.33, 72.94       | 2.559       | 656.6218868 | 3         | 0.0000523  | 0.0266  | 163  | 175  |
| IP100007941 | Protein HEXIM1                                                                             | TGLYSKR             | 58.42              | 2.239       | 452.7181088 | 2         | -0.00103   | -1.14   | 222  | 228  |
| IP100007941 | Protein HEXIM1                                                                             | HWKPYK              | 48.87              | 2.483       | 551.2499997 | 2         | -0.000152  | -0.138  | 163  | 169  |
| IP100007941 | Protein HEXIM1                                                                             | DFSETYER            | 30.97              | 1.312       | 563.7081906 | 2         | -0.00087   | -0.773  | 266  | 273  |
| IP101014975 | Talin 1                                                                                    | ALDYMYLR            | 48.87              | 2.373       | 562.7468869 | 2         | 0.000722   | 0.642   | 67   | 74   |
| IP100908791 | Uncharacterized protein                                                                    | QVVSAYEVIK          | 44.63              | 2.038       | 672.8265988 | 2         | 0.000146   | 0.109   | 207  | 217  |
| IP100908791 | Uncharacterized protein                                                                    | DQLYNLK             | 1000               | 1.875       | 600.3085324 | 2         | 0.00131    | 1.09    | 6    | 14   |
| IP100908791 | Uncharacterized protein                                                                    | DQLYNLKKEEQTPQNK    | 93.12              | 2.421       | 718.6885982 | 3         | 0.00142    | 0.658   | 6    | 22   |
| IP100641212 | cDNA FLJ54733, highly similar to General transcription factor 3C polypeptide 5             | RSTYNSLPITVK        | 0                  | 1.824       | 811.4030759 | 2         | -0.0008    | -0.493  | 217  | 229  |
| IP100641212 | cDNA FLJ54733, highly similar to General transcription factor 3C polypeptide 5             | LDAPVDFYRPETQHR     | 37.77              | 3.382       | 522.490356  | 4         | -0.000978  | -0.468  | 51   | 66   |
| IP100641212 | cDNA FLJ54733, highly similar to General transcription factor 3C polypeptide 5             | HGAPSDLPVK          | 93.05              | 2.624       | 632.292297  | 2         | -0.000857  | -0.679  | 204  | 212  |
| IP100641212 | cDNA FLJ54733, highly similar to General transcription factor 3C polypeptide 5             | JYQVLDLR            | 1000               | 2.495       | 567.2734982 | 2         | -0.000555  | -0.49   | 190  | 199  |
| IP100641212 | cDNA FLJ54733, highly similar to General transcription factor 3C polypeptide 5             | STYNSLPITVK         | 58.42              | 3.42        | 733.352905  | 2         | -0.000416  | -0.0284 | 218  | 227  |
| IP100923260 | cDNA FLJ54488, highly similar to Eukaryotic translation initiation factor 3 subunit1       | QTYGGYFR            | 46.67              | 1.338       | 564.7291257 | 2         | -0.0012    | -1.06   | 757  | 765  |
| IP10026215  | Flap endonuclease 1                                                                        | RDPNkyPVPENWLHK     | 1000               | 4.367       | 522.2627559 | 4         | -0.000178  | -0.0854 | 262  | 277  |
| IP100894287 | cDNA FLJ56889, moderately similar to Vigilin                                               | MDYVEINIDK          | 1000               | 2.698       | 728.8124997 | 2         | -0.00135   | -0.928  | 402  | 412  |
| IP100181728 | Ribosome biogenesis protein BRX1 homolog                                                   | KKQDLYMWSLNSPHGPSAK | 129.36             | 2.421       | 756.3605953 | 3         | -0.00249   | -1.1    | 122  | 140  |
| IP100181728 | Ribosome biogenesis protein BRX1 homolog                                                   | QDLYMWSLNSPHGPSAK   | 163.22             | 3.036       | 670.9650264 | 3         | 0.000803   | 0.399   | 3    | 24   |
| IP100181728 | Ribosome biogenesis protein BRX1 homolog                                                   | KQDLYMWSLNSPHGPSAK  | 192.61             | 2.909       | 713.662109  | 3         | -0.00295   | -1.38   | 123  | 140  |
| IP100854834 | echinoderm microtubule-associated protein-like 4 isoform b                                 | DVITNQEYGEIK        | 1000               | 1.807       | 750.8533932 | 2         | 0.0000349  | 0.0233  | 159  | 170  |
| IP100019046 | Isoform 1 of Pre-mRNA-splicing factor RBM22                                                | SDVNKEYYQNMER       | 53.49, 27.96       | 2.879       | 646.2443843 | 3         | -0.00146   | -0.751  | 110  | 123  |
| IP100019046 | Isoform 1 of Pre-mRNA-splicing factor RBM22                                                | SDVNKEYYQNMER       | 60.18, 1,000.00    | 2.13        | 624.9210201 | 3         | -0.000131  | -0.0701 | 110  | 123  |
| IP100019046 | Isoform 1 of Pre-mRNA-splicing factor RBM22                                                | SDVNKEYYQNMER       | 81.61              | 5.438       | 619.589294  | 3         | -0.000395  | -0.212  | 110  | 123  |
| IP100019046 | Isoform 1 of Pre-mRNA-splicing factor RBM22                                                | DryYGINDPVADK       | 23.2               | 2.818       | 535.9032589 | 3         | -0.00111   | -0.685  | 200  | 212  |
| IP100019046 | Isoform 1 of Pre-mRNA-splicing factor RBM22                                                | TPFYKR              | 22.52              | 1.548       | 504.7314755 | 2         | -0.000501  | -0.496  | 153  | 159  |
| IP100334587 | Isoform 2 of Heterogeneous nuclear ribonucleoprotein A/B                                   | EVYQQQYVGGGR        | 43.29              | 1.996       | 790.3305051 | 2         | -0.00114   | -0.723  | 233  | 245  |
| IP100334587 | Isoform 2 of Heterogeneous nuclear ribonucleoprotein A/B                                   | DLKDYFTK            | 43.29              | 1.193       | 555.2495114 | 2         | -0.00103   | -0.927  | 85   | 92   |
| IP100334587 | Isoform 2 of Heterogeneous nuclear ribonucleoprotein A/B                                   | GGHQNNYKPY          | 74.63              | 1.354       | 629.2564084 | 2         | -0.000435  | -0.346  | 323  | 332  |
| IP100334587 | Isoform 2 of Heterogeneous nuclear ribonucleoprotein A/B                                   | RGGHQNNYKPY         | 101.06             | 4.268       | 471.8736568 | 3         | -0.00121   | -0.853  | 322  | 332  |
| IP100303402 | Phosphorylated adapter RNA export protein                                                  | QSETNYLLAK          | 60.18              | 3.132       | 705.3219601 | 2         | 0.000669   | 0.474   | 148  | 158  |
| IP100303402 | Phosphorylated adapter RNA export protein                                                  | QSETNYLLAK          | 30.97, 88.93       | 2.246       | 745.304443  | 2         | -0.000697  | -0.468  | 148  | 158  |
| IP100303402 | Phosphorylated adapter RNA export protein                                                  | AFQNTATACAPVSHYR    | 39.54              | 4.45        | 625.2729488 | 3         | -0.0024    | -1.28   | 43   | 58   |
| IP101010257 | Similar to YLP motif containing 1                                                          | GPASQYITPSTLSLSPR   | 60.18              | 2.488       | 944.9470212 | 2         | 0.00149    | 0.789   | 528  | 544  |
| IP101010257 | Similar to YLP motif containing 1                                                          | DREPYFDR            | 1000               | 2.04        | 589.2379147 | 2         | -0.000221  | -0.0188 | 1404 | 1411 |
| IP101010257 | Similar to YLP motif containing 1                                                          | MEDYQLPDDYDTR       | 202.1              | 2.08        | 927.3699387 | 2         | 0.00122    | 0.656   | 1790 | 1803 |
| IP101010257 | Similar to YLP motif containing 1                                                          | ERDREPYFDR          | 1000               | 2.131       | 488.2093807 | 3         | 0.000765   | 0.523   | 1402 | 1411 |
| IP101010257 | Similar to YLP motif containing 1                                                          | GVIDYDRDRFDR        | 1000               | 1.838       | 536.238525  | 3         | -0.0018    | -1.12   | 1437 | 1448 |
| IP100017617 | Probable ATP-dependent RNA helicase DDX5                                                   | DRENYDRGYSLLK       | 14.23              | 1.916       | 599.2719112 | 3         | -0.00164   | -0.915  | 510  | 523  |
| IP100017617 | Probable ATP-dependent RNA helicase DDX5                                                   | GYSLLK              | 58.42              | 2.123       | 424.2018735 | 2         | -0.000805  | -0.95   | 517  | 523  |
| IP100017617 | Probable ATP-dependent RNA helicase DDX5                                                   | TGTAYTFFPNPK        | 53.98              | 2.378       | 827.8809201 | 2         | 0.00209    | 1.26    | 438  | 451  |
| IP100017617 | Probable ATP-dependent RNA helicase DDX5                                                   | STGYGGAPK           | 86.37              | 1.614       | 567.2387692 | 2         | -0.000678  | -0.599  | 198  | 207  |
| IP100017617 | Probable ATP-dependent RNA helicase DDX5                                                   | GYSLLK              | 67.96              | 1.643       | 502.2521054 | 2         | -0.00144   | -1.44   | 517  | 524  |
| IP100307733 | Isoform 1 of Histone-lysine N-methyltransferase SETD2                                      | ITYYHVTR            | 54.16              | 2.845       | 436.5445552 | 3         | -0.000911  | -0.697  | 2405 | 2413 |
| IP100307733 | Isoform 1 of Histone-lysine N-methyltransferase SETD2                                      | NHYYFMALK           | 61.94              | 2.359       | 690.3148801 | 2         | -0.000391  | -0.284  | 1601 | 1610 |
| IP100307733 | Isoform 1 of Histone-lysine N-methyltransferase SETD2                                      | SHYYDSDRR           | 60.18              | 1.447       | 639.748779  | 2         | -0.000694  | -0.543  | 425  | 433  |
| IP100790342 | 60S ribosomal protein L6                                                                   | SVFALNTGYPHK        | 103.45             | 2.893       | 509.589676  | 3         | 0.00133    | 0.869   | 274  | 286  |
| IP100031801 | Isoform 1 of DNA-binding protein A                                                         | RPQYRPQYR           | 44.63              | 1.179       | 448.5500484 | 3         | -0.00293   | -2.18   | 225  | 233  |
| IP100031801 | Isoform 1 of DNA-binding protein A                                                         | RPYNYR              | 23.2               | 1.704       | 474.707977  | 2         | -0.0011    | -1.16   | 331  | 336  |
| IP100186290 | Elongation factor 2                                                                        | EDLYLKPQIR          | 1000               | 2.417       | 452.2306514 | 3         | -0.00112   | -0.828  | 440  | 449  |
| IP100186290 | Elongation factor 2                                                                        | KEDLYLKPQIR         | 1000               | 3.378       | 494.9289241 | 3         | -0.0013    | -0.88   | 439  | 449  |
| IP100465248 | Isoform alpha-enolase of Alpha-enolase                                                     | IGAIFYHLNK          | 1000               | 2.211       | 612.2952267 | 2         | 0.00000193 | 0.00157 | 184  | 191  |
| IP100302302 | Isoform 2 of Homeodomain-interacting protein kinase 1                                      | AVSTYLLQSR          | 30.97              | 2.713       | 632.7734982 | 2         | -0.00052   | -0.412  | 347  | 356  |
| IP100645010 | Uncharacterized protein                                                                    | FAQPGSFYAYAMR       | 53.49, 1,000.00    | 2.089       | 597.9080806 | 3         | -0.00025   | -0.195  | 165  | 178  |
| IP100645010 | Uncharacterized protein                                                                    | FAQPGSFYAYAMR       | 54.16              | 2.259       | 888.3613278 | 2         | 0.000804   | 0.453   | 165  | 178  |
| IP100645010 | Uncharacterized protein                                                                    | FAQPGSFYAYAMR       | 74.63, 66.86       | 1.649       | 928.3446652 | 2         | 0.00115    | 0.618   | 165  | 178  |
| IP100294794 | RRP12-like protein isoform 2                                                               | GRPDYAYPLNR         | 0                  | 1.15        | 806.3881833 | 2         | -0.000805  | -0.0527 | 1185 | 1197 |
| IP100294794 | RRP12-like protein isoform 2                                                               | KGRPDYAYPLNR        | 81.39              | 2.38        | 580.6263424 | 3         | -0.00025   | -0.143  | 1184 | 1197 |
| IP100294794 | RRP12-like protein isoform 2                                                               | GRPDYAYPLNR         | 1,000.00, 1,000.00 | 2.335       | 564.5827633 | 3         | -0.00232   | -1.37   | 1185 | 1197 |
| IP100010204 | Serine/arginine-rich splicing factor 3                                                     | AFGYGLR             | 58.42              | 2.535       | 562.2525632 | 2         | -0.000525  | -0.467  | 29   | 37   |
| IP100815713 | Uncharacterized protein                                                                    | ELLPLIYHLNR         | 1000               | 3.358       | 532.9612423 | 3         | 0.00115    | 0.72    | 9    | 20   |
| IP100925601 | Uncharacterized protein                                                                    | LAGDKANYYWVLR       | 10                 |             |             |           |            |         |      |      |

|             |                                                                                               |                                                                                               |                  |       |             |   |            |         |      |      |
|-------------|-----------------------------------------------------------------------------------------------|-----------------------------------------------------------------------------------------------|------------------|-------|-------------|---|------------|---------|------|------|
| IP100216659 | Isoform 2 of RNA-binding protein 8A                                                           | mREDYDSVEQDGEFGPQR                                                                            | 1,000.00, 17.99  | 3.825 | 773.6333614 | 3 | -0.00321   | -1.38   | 49   | 67   |
| IP100003768 | Isoform 1 of Pescadillo homolog                                                               | GSATNIVTR                                                                                     | 60.18            | 2.233 | 531.734985  | 2 | 0.0000185  | 0.0174  | 12   | 20   |
| IP100003768 | Isoform 1 of Pescadillo homolog                                                               | EGDYVPPEKK                                                                                    | 1000             | 1.254 | 677.8184811 | 2 | -0.000689  | -0.509  | 431  | 441  |
| IP100003768 | Isoform 1 of Pescadillo homolog                                                               | EKLYQK                                                                                        | 74.96            | 1.515 | 526.2469479 | 2 | -0.000556  | -0.528  | 544  | 550  |
| IP100003768 | Isoform 1 of Pescadillo homolog                                                               | EGDYVPPEK                                                                                     | 1000             | 1.114 | 557.2288815 | 2 | -0.000789  | -0.708  | 431  | 439  |
| IP100290142 | CTP synthase 1                                                                                | LYGDADYLEER                                                                                   | 144.55           | 2.198 | 712.2925412 | 2 | -0.00117   | -0.821  | 467  | 477  |
| IP100290142 | CTP synthase 1                                                                                | KLYGDADYLEER                                                                                  | 183.68           | 2.985 | 776.3400876 | 2 | -0.00108   | -0.694  | 466  | 477  |
| IP100550191 | Uncharacterized protein C9orf78                                                               | ATDDYHYEK                                                                                     | 0                | 1.654 | 611.2268063 | 2 | -0.000839  | -0.687  | 273  | 281  |
| IP100550191 | Uncharacterized protein C9orf78                                                               | ATDDYHYEKF                                                                                    | 24.95            | 2.248 | 499.5415035 | 3 | -0.00117   | -0.779  | 273  | 283  |
| IP100550191 | Uncharacterized protein C9orf78                                                               | ATDDYHYEKF                                                                                    | 82.82, 117.70    | 2.289 | 526.1978756 | 3 | 0.00162    | 1.03    | 273  | 283  |
| IP100550191 | Uncharacterized protein C9orf78                                                               | NAEDLVLPENIR                                                                                  | 1000             | 2.472 | 908.386047  | 2 | 0.00168    | 0.924   | 141  | 154  |
| IP100977430 | cDNA, FLJ79286, highly similar to T-complex protein 1 subunit gamma                           | KIGDEYFTTDDKDKP                                                                               | 61.15            | 4.021 | 719.6591182 | 3 | -0.000287  | -0.133  | 309  | 325  |
| IP100655641 | Isoform 2 of Transcription elongation factor SPT5                                             | DQREELGGEYMKK                                                                                 | 20.19            | 3.682 | 475.2060847 | 4 | -0.00366   | -1.93   | 127  | 140  |
| IP100655641 | Isoform 2 of Transcription elongation factor SPT5                                             | DQREELGGEYMK                                                                                  | 50.64            | 4.226 | 590.5750118 | 3 | -0.000141  | -0.0798 | 127  | 139  |
| IP100655641 | Isoform 2 of Transcription elongation factor SPT5                                             | EELGGEYMKK                                                                                    | 24.95            | 2.009 | 500.2104183 | 3 | -0.00222   | -1.48   | 130  | 140  |
| IP100655641 | Isoform 2 of Transcription elongation factor SPT5                                             | RRGGMTSTYGR                                                                                   | 27.96            | 2.19  | 421.5161739 | 3 | -0.00255   | -2.02   | 753  | 763  |
| IP100783594 | Isoform 3 of RNA-binding protein with serine-rich domain 1                                    | MHPHLSKGYAVFENPEAEK                                                                           | 15.47            | 5.275 | 668.5438838 | 4 | -0.00207   | -0.774  | 160  | 181  |
| IP100783594 | Isoform 3 of RNA-binding protein with serine-rich domain 1                                    | GAYVEFENPEAEK                                                                                 | 86.89            | 3.747 | 920.8698727 | 2 | -0.0000608 | -0.033  | 167  | 181  |
| IP100221012 | Isoform 1 of Probable ubiquitin carboxyl-terminal hydrolase FAF-X                             | FNDYFEFPR                                                                                     | 1000             | 1.949 | 657.764465  | 2 | 0.00148    | 1.12    | 1812 | 1820 |
| IP100006482 | Isoform Long of Sodium/potassium-transporting ATPase subunit alpha-1                          | GIWYTGDR                                                                                      | 30.97            | 2.855 | 530.2476193 | 2 | -0.000313  | -0.295  | 256  | 264  |
| IP100237671 | Neurofilament light polypeptide                                                               | SAYSSYAPVSSSLVSR                                                                              | 27.96            | 3.678 | 914.4127804 | 2 | 0.00141    | 0.771   | 38   | 54   |
| IP100237671 | Neurofilament light polypeptide                                                               | SAYGLQTSYVLMSTR                                                                               | 27.96            | 1.885 | 901.396423  | 2 | 0.00179    | 0.996   | 422  | 437  |
| IP100219929 | Isoform 2 of Protein max                                                                      | ATEYIQYMR                                                                                     | 124.16           | 2.587 | 627.7653195 | 2 | -0.000213  | -0.169  | 58   | 66   |
| IP100219929 | Isoform 2 of Protein max                                                                      | ATEYIQYMR                                                                                     | 124.16, 1,000.00 | 2.077 | 635.762634  | 2 | -0.000499  | -0.392  | 58   | 66   |
| IP100219929 | Isoform 2 of Protein max                                                                      | SSAQLQTNYPSSDNLSTYNAK                                                                         | 54.16            | 2.911 | 1185.020385 | 2 | 0.00312    | 1.32    | 98   | 118  |
| IP101011344 | 37 kDa protein                                                                                | IWHHTFYNELR                                                                                   | 84.46            | 3.897 | 532.5772701 | 3 | 0.000134   | 0.0838  | 85   | 95   |
| IP100644488 | guanylate kinase isoform a                                                                    | NRRPGEVFKDYVFFTR                                                                              | 38.17            | 4.198 | 531.2407832 | 4 | 0.0000313  | 0.0147  | 63   | 79   |
| IP100923436 | Isoform 4 of Nuclear receptor corepressor 2                                                   | NFYFNYK                                                                                       | 124.16           | 1.905 | 531.2185055 | 2 | 0.00026    | 0.241   | 651  | 657  |
| IP100923436 | Isoform 4 of Nuclear receptor corepressor 2                                                   | SAVYPLLYR                                                                                     | 124.16           | 2.097 | 581.2893674 | 2 | -0.000168  | -0.0145 | 2230 | 2238 |
| IP100418169 | Isoform 2 of Annexin A2                                                                       | SLYVYQQDQTK                                                                                   | 61.94            | 3.164 | 751.3347165 | 2 | -0.000119  | -0.079  | 332  | 342  |
| IP100005648 | Scaffold attachment factor B2                                                                 | DDAYWPEGK                                                                                     | 1000             | 2.528 | 580.7189938 | 2 | -0.000164  | -0.141  | 738  | 746  |
| IP100005648 | Scaffold attachment factor B2                                                                 | DDAYWPEGRK                                                                                    | 1000             | 1.776 | 439.5153804 | 3 | -0.000935  | -0.71   | 738  | 747  |
| IP100009071 | Isoform 3 of Serine/arginine-rich splicing factor 10                                          | YDDYDR                                                                                        | 105.08           | 1.419 | 463.6502988 | 2 | -0.000654  | -0.706  | 110  | 115  |
| IP100009071 | Isoform 3 of Serine/arginine-rich splicing factor 10                                          | YDDYDRYR                                                                                      | 69.51            | 1.667 | 415.8242183 | 2 | -0.000822  | -0.66   | 110  | 117  |
| IP100009071 | Isoform 3 of Serine/arginine-rich splicing factor 10                                          | SFDYNYR                                                                                       | 27.96            | 1.424 | 522.695068  | 2 | -0.000415  | -0.398  | 133  | 139  |
| IP100009071 | Isoform 3 of Serine/arginine-rich splicing factor 10                                          | GFAYVQFEDVR                                                                                   | 1000             | 2.169 | 705.8092038 | 2 | 0.00106    | 0.749   | 52   | 62   |
| IP100009071 | Isoform 3 of Serine/arginine-rich splicing factor 10                                          | SFDYNYRR                                                                                      | 20.2             | 1.6   | 400.8327938 | 3 | -0.0011    | -0.912  | 133  | 140  |
| IP100009071 | Isoform 3 of Serine/arginine-rich splicing factor 10                                          | SRSFDYNYRR                                                                                    | 18.44, 30.66     | 1.193 | 508.5329586 | 2 | -0.0000324 | -0.0212 | 131  | 140  |
| IP100003479 | Mitogen-activated protein kinase 1                                                            | VADPDHDTGFLVEVATR                                                                             | 30.38, 43.77     | 1.896 | 768.6511837 | 3 | 0.000143   | 0.062   | 173  | 191  |
| IP101010914 | Rearranged L-myc fusion sequence variant (Fragment)                                           | GESHEVFTSK                                                                                    | 43.77            | 1.834 | 455.1906734 | 3 | -0.000756  | -0.555  | 343  | 353  |
| IP101010914 | Rearranged L-myc fusion sequence variant (Fragment)                                           | FTCGDGGGTYK                                                                                   | 27.96            | 2.037 | 790.2833859 | 2 | -0.00111   | -0.703  | 648  | 660  |
| IP101010914 | Rearranged L-myc fusion sequence variant (Fragment)                                           | HKDYDDFLR                                                                                     | 77.86            | 2.708 | 484.5382381 | 3 | -0.000762  | -0.525  | 1163 | 1172 |
| IP101010914 | Rearranged L-myc fusion sequence variant (Fragment)                                           | SNYSQHYVYR                                                                                    | 24.95            | 2.141 | 698.7883908 | 2 | 0.00043    | 0.308   | 1153 | 1162 |
| IP100807491 | Isoform 2 of General transcription factor 3C polypeptide 1                                    | SMEVPKAQASHNTYLLMR                                                                            | 17.99            | 3.714 | 719.3387447 | 3 | -0.00284   | -1.32   | 1632 | 1649 |
| IP100807491 | Isoform 2 of General transcription factor 3C polypeptide 1                                    | GYSYSGVSTR                                                                                    | 61.94            | 2.312 | 640.2899777 | 2 | -0.000296  | -0.231  | 1650 | 1660 |
| IP100807491 | Isoform 2 of General transcription factor 3C polypeptide 1                                    | NHPYIVPGLGR                                                                                   | 1000             | 2.804 | 467.9065515 | 3 | 0.000678   | 0.484   | 778  | 789  |
| IP100021320 | 75K snRNA methylphosphate capping enzyme                                                      | DAPQYVELNAINCR                                                                                | 69.63            | 2.467 | 614.6007686 | 2 | -0.00284   | -1.54   | 311  | 325  |
| IP100021320 | 75K snRNA methylphosphate capping enzyme                                                      | KFYQYNYK                                                                                      | 79.9             | 2.176 | 644.2656247 | 2 | 0.0000325  | 0.0253  | 412  | 420  |
| IP100021320 | 75K snRNA methylphosphate capping enzyme                                                      | FQYQYNYK                                                                                      | 79.9             | 1.79  | 580.7177731 | 2 | -0.000671  | -0.578  | 413  | 420  |
| IP100910664 | cDNA FLJ52148, highly similar to Apoptosis inhibitor 5                                        | QYNNPSSGK                                                                                     | 89.54            | 2.36  | 542.2477414 | 2 | -0.000688  | -0.0635 | 306  | 314  |
| IP100910664 | cDNA FLJ52148, highly similar to Apoptosis inhibitor 5                                        | YSSNLGNFYER                                                                                   | 0.00, 229.88     | 3.03  | 812.2979123 | 2 | -0.000585  | -0.036  | 315  | 326  |
| IP100910664 | cDNA FLJ52148, highly similar to Apoptosis inhibitor 5                                        | NYGILADATEQVGHK                                                                               | 183.36           | 2.81  | 608.6162716 | 3 | 0.0000381  | 0.0209  | 10   | 25   |
| IP100910664 | cDNA FLJ52148, highly similar to Apoptosis inhibitor 5                                        | YSSNLGNFYER                                                                                   | 194.35           | 3.831 | 772.3145749 | 2 | -0.000402  | -0.26   | 315  | 326  |
| IP100024320 | Putative RNA-binding protein 3                                                                | YDSRPPGGYGGYGR                                                                                | 26.20, 24.95     | 2.242 | 630.9011837 | 3 | -0.00116   | -0.612  | 117  | 131  |
| IP100024320 | Putative RNA-binding protein 3                                                                | YDSRPPGGYGGYGR                                                                                | 0                | 3.013 | 604.245483  | 3 | -0.00193   | -1.06   | 117  | 131  |
| IP100060715 | BTB/POZ domain-containing protein KCTD12                                                      | EAEYFELPELVR                                                                                  | 1000             | 2.629 | 787.8623044 | 2 | 0.00236    | 1.5     | 116  | 127  |
| IP100060715 | BTB/POZ domain-containing protein KCTD12                                                      | EAEYFELPELVR                                                                                  | 1000             | 2.185 | 577.6107784 | 3 | 0.00116    | 0.669   | 116  | 128  |
| IP100853115 | NEFM protein                                                                                  | FAGYIEK                                                                                       | 1000             | 1.541 | 454.201904  | 2 | -0.000744  | -0.819  | 112  | 118  |
| IP100719106 | Isoform 2 of Cleavage and polyadenylation specificity factor subunit 7                        | TPAILTYGSLR                                                                                   | 0                | 2.75  | 717.8558957 | 2 | 0.00044    | 0.307   | 67   | 78   |
| IP100719106 | Isoform 2 of Cleavage and polyadenylation specificity factor subunit 7                        | DLHNEHRDDYFQER                                                                                | 1000             | 2.78  | 727.9713741 | 2 | -0.000854  | -0.392  | 431  | 446  |
| IP100719106 | Isoform 2 of Cleavage and polyadenylation specificity factor subunit 7                        | HDDYFQER                                                                                      | 1000             | 2.262 | 595.2194211 | 2 | -0.000609  | -0.512  | 439  | 446  |
| IP100376215 | Isoform 2 of DNA-dependent protein kinase catalytic subunit                                   | SYVAVDR                                                                                       | 30.97            | 1.516 | 488.700195  | 2 | -0.000362  | -0.37   | 882  | 888  |
| IP100376215 | Isoform 2 of DNA-dependent protein kinase catalytic subunit                                   | NWYPR                                                                                         | 1000             | 1.386 | 408.1657101 | 2 | -0.000531  | -0.652  | 4006 | 4010 |
| IP100376215 | Isoform 2 of DNA-dependent protein kinase catalytic subunit                                   | LSLMyAR                                                                                       | 132.02           | 1.86  | 467.2171017 | 2 | -0.000548  | -0.587  | 2739 | 2745 |
| IP100247583 | 60S ribosomal protein L21                                                                     | KHGVPLATYMR                                                                                   | 20.98            | 2.636 | 484.5795894 | 3 | -0.000408  | -0.281  | 21   | 32   |
| IP100247583 | 60S ribosomal protein L21                                                                     | HGVPLATYMR                                                                                    | 0                | 2.912 | 662.3179318 | 2 | -0.000488  | -0.369  | 22   | 32   |
| IP100247583 | 60S ribosomal protein L21                                                                     | HGVPLATYMR                                                                                    | 0.00, 1,000.00   | 1.153 | 670.3159177 | 2 | 0.000569   | 0.425   | 22   | 32   |
| IP100908463 | cDNA FLJ54451, highly similar to Stress-induced-phosphoprotein 1                              | LAVINPDLALEEK                                                                                 | 1000             | 3.086 | 784.8846432 | 2 | -0.000105  | -0.0415 | 328  | 340  |
| IP100328987 | Bystin                                                                                        | GTGEAEVEYVGR                                                                                  | 304.3            | 4.158 | 737.2984006 | 2 | -0.0015    | -0.713  | 41   | 53   |
| IP100328987 | Bystin                                                                                        | GRTGCAEEVEYVGR                                                                                | 58.32            | 1.814 | 843.8579709 | 2 | -0.00451   | -2.67   | 39   | 53   |
| IP100166845 | Isoform 3 of Tyrosine-protein kinase Fyn                                                      | LIEDNEYAR                                                                                     | 22.52            | 1.45  | 652.2825925 | 2 | 0.000133   | 0.102   | 359  | 368  |
| IP100221141 | Isoform CSBP1 of Mitogen-activated protein kinase 14                                          | HTDDEMTGYVATR                                                                                 | 81.39            | 2.612 | 525.8770137 | 3 | 0.000165   | 0.104   | 174  | 186  |
| IP101011924 | 117 kDa protein                                                                               | TYLEK                                                                                         | 30.97            | 1.361 | 448.6937253 | 2 | -0.0011    | -1.23   | 992  | 997  |
| IP101011924 | 117 kDa protein                                                                               | KLYYQQLK                                                                                      | 55.92            | 3.265 | 582.2907058 | 2 | -0.000436  | -0.375  | 776  | 783  |
| IP101011924 | 117 kDa protein                                                                               | SRITYLEK                                                                                      | 42.13            | 2.277 | 570.2604977 | 2 | -0.000656  | -0.576  | 990  | 997  |
| IP100413365 | Isoform 1 of Zinc finger protein 318                                                          | LESLEETNPEYAK                                                                                 | 84.46            | 2.768 | 801.8501584 | 2 | -0.00163   | -1.02   | 579  | 591  |
| IP100413365 | Isoform 1 of Zinc finger protein 318                                                          | MYTLR                                                                                         | 61.94            | 1.772 | 413.1718747 | 2 | -0.0011    | -1.34   | 909  | 913  |
| IP100413365 | Isoform 1 of Zinc finger protein 318                                                          | KIYELAVWIDENKK                                                                                | 1000             | 2.65  | 572.6188961 | 3 | -0.0000884 | -0.0515 | 1952 | 1964 |
| IP100798211 | Uncharacterized protein                                                                       | LGEYEDVSR                                                                                     | 152.42           | 2.646 | 574.2370602 | 2 | -0.00103   | -0.899  | 95   | 103  |
| IP100798211 | Uncharacterized protein                                                                       | LGEYEDVSRVEK                                                                                  | 100.69           | 3.061 | 501.8961177 | 3 | -0.000623  | -0.415  | 95   | 106  |
| IP100644618 | Isoform 4 of Myelin protein zero-like protein 1                                               | SESVYADIR                                                                                     | 127.17           | 2.598 | 609.7744748 | 2 | 0.000398   | 0.327   | 134  | 143  |
| IP100022353 | Non-receptor tyrosine-protein kinase TYK2                                                     | LLAQAEQEPYR                                                                                   | 1000             | 2.743 | 800.3659665 | 2 | -0.000284  | -0.177  | 282  | 294  |
| IP100015912 | Protein FAMS0B                                                                                | FSAHYDAVEAEK                                                                                  | 70.9             | 4.383 | 520.5644527 | 2 | -0.000618  | -0.397  | 49   | 61   |
| IP100015912 | Protein FAMS0B                                                                                | WDKYITR                                                                                       | 55.92            | 2.088 | 531.2449948 | 2 | -0.0000619 | -0.0584 | 319  | 325  |
| IP100300060 | WD repeat-containing protein 70                                                               | AAEDSPWVSPAYSK                                                                                | 74.63            | 2.419 | 875.8723752 | 2 | 0.000399   | 0.228   | 612  | 626  |
| IP100297211 | SWI/SNF-related matrix-associated actin-dependent regulator of chromatin subfamily Q member 1 | SWI/SNF-related matrix-associated actin-dependent regulator of chromatin subfamily Q member 1 | 84.46            | 2.911 | 622.7877194 | 2 | -0.000113  | -0.0906 | 133  | 142  |
| IP100297211 | SWI/SNF-related matrix-associated actin-dependent regulator of chromatin subfamily Q member 1 | SWI/SNF-related matrix-associated actin-dependent regulator of chromatin subfamily Q member 1 | 155.62           | 2.589 | 466.5471187 | 2 | 0.00028    | 0.2     | 739  | 749  |
| IP100940851 | ELAV-like protein 1                                                                           | NVALL                                                                                         |                  |       |             |   |            |         |      |      |

|             |                                                                                             |                      |                    |        |              |   |            |         |      |      |
|-------------|---------------------------------------------------------------------------------------------|----------------------|--------------------|--------|--------------|---|------------|---------|------|------|
| IP100018203 | isoform SRP55-2 of Serine/arginine-rich splicing factor 6                                   | NGYGFVEFSDR          | 223                | 2.374  | 750.2960812  | 2 | -0.0000891 | -0.0594 | 35   | 46   |
| IP100018203 | isoform SRP55-2 of Serine/arginine-rich splicing factor 6                                   | DGYSYGR              | 61.94              | 1.807  | 492.6762387  | 2 | -0.00177   | -1.8    | 78   | 85   |
| IP100911038 | apoptotic chromatin condensation inducer in the nucleus isoform 3                           | STLADYSAQK           | 30.97              | 1.735  | 582.2532956  | 2 | 0.00014    | 0.12    | 467  | 476  |
| IP100911038 | apoptotic chromatin condensation inducer in the nucleus isoform 3                           | FLcAdyAEQDELHYHR     | 125.39             | 3.956  | 708.9505611  | 3 | -0.00156   | -0.734  | 1041 | 1056 |
| IP100911038 | apoptotic chromatin condensation inducer in the nucleus isoform 3                           | FLcAdyAEQDELHYHR     | 1,000.00, 1,000.00 | 3.259  | 735.6063839  | 3 | -0.000422  | -0.191  | 1041 | 1056 |
| IP100911038 | apoptotic chromatin condensation inducer in the nucleus isoform 3                           | STLADySAQKDLPEPSDR   | 23.2               | 3.825  | 702.3071895  | 3 | -0.00191   | -0.906  | 467  | 484  |
| IP100985363 | Conserved hypothetical protein                                                              | IvYLYTK              | 116.83             | 2.222  | 490.2492367  | 2 | 0.0000219  | 0.0224  | 30   | 36   |
| IP100999544 | cDNA FLJ52848, highly similar to ATP-dependent RNA helicase DDX3X                           | GRSDyDGIGSR          | 41.47              | 1.823  | 421.5101009  | 3 | -0.00217   | -1.72   | 144  | 154  |
| IP100744918 | Isoform 2 of Wings apart-like protein homolog                                               | REDKELYTVVQHVK       | 67.98              | 5.464  | 456.7320552  | 4 | -0.00108   | -0.593  | 664  | 677  |
| IP100744918 | Isoform 2 of Wings apart-like protein homolog                                               | EDKELYTVVQHVK        | 43.29              | 3.096  | 556.6067501  | 3 | -0.000126  | -0.0758 | 665  | 677  |
| IP100744918 | Isoform 2 of Wings apart-like protein homolog                                               | ELYTVVQHVK           | 30.97              | 2.086  | 648.3242795  | 2 | 0.000607   | 0.469   | 668  | 677  |
| IP100298347 | Isoform 2 of Tyrosine-protein phosphatase non-receptor type 11                              | IQNTGDYDLGGGEK       | 30.97              | 3.089  | 908.3779294  | 2 | -0.0000928 | -0.0511 | 56   | 70   |
| IP100003438 | DnaJ homolog subfamily C member 8                                                           | ALDVIQAGKEYVEHTVK    | 43.71              | 3.14   | 495.7515864  | 4 | -0.00166   | -0.836  | 119  | 135  |
| IP100003438 | DnaJ homolog subfamily C member 8                                                           | AFAVDKkAYK           | 1000               | 2.479  | 611.2812497  | 2 | -0.00105   | -0.861  | 99   | 108  |
| IP100026089 | Splicing factor 3B subunit 1                                                                | TYMDVNR              | 47.96              | 2.372  | 498.1904904  | 2 | -0.0000707 | -0.0711 | 151  | 157  |
| IP100026089 | Splicing factor 3B subunit 1                                                                | IYNDKNTYR            | 23.2               | 3.055  | 498.8927913  | 3 | -0.000403  | -0.269  | 1287 | 1297 |
| IP100032791 | Ribonuclease P protein subunit p29                                                          | SVIYHALSQK           | 112.12             | 2.969  | 613.3030392  | 2 | 0.0000269  | 0.022   | 3    | 12   |
| IP100032791 | Ribonuclease P protein subunit p29                                                          | AVVLEyFR             | 24.95              | 2.092  | 589.287048   | 2 | 0.000445   | 0.377   | 55   | 63   |
| IP100216044 | Isoform 1 of RNA-binding protein Raly                                                       | VAGCSVHKyAFVQYSNER   | 144.66             | 5.597  | 751.3367916  | 3 | -0.00117   | -0.518  | 48   | 66   |
| IP100216044 | Isoform 1 of RNA-binding protein Raly                                                       | AASAlYR              | 100.09             | 1.652  | 416.191589   | 2 | -0.00117   | -1.41   | 104  | 110  |
| IP100216044 | Isoform 1 of RNA-binding protein Raly                                                       | GyAFVQYSNER          | 252.88             | 3.15   | 707.2948262  | 2 | -0.00179   | -1.26   | 56   | 66   |
| IP100328526 | Isoform ARPP-19 of cAMP-regulated phosphoprotein 19                                         | GQKVFDSGDYVMAK       | 110.85             | 3.609  | 568.5646358  | 3 | 0.000431   | 0.253   | 56   | 69   |
| IP100328526 | Isoform ARPP-19 of cAMP-regulated phosphoprotein 19                                         | YFDSGDYVMAK          | 74.63              | 1.858  | 695.7556149  | 2 | 0.000678   | 0.488   | 59   | 69   |
| IP101015447 | 47 kDa protein                                                                              | NGYGFVEFDDL          | 1000               | 1.974  | 756.3150021  | 2 | 0.00125    | 0.829   | 35   | 46   |
| IP101015447 | 47 kDa protein                                                                              | DADDAYVLENGKDLGER    | 1000               | 3.927  | 707.2933345  | 3 | -0.000338  | -0.16   | 47   | 64   |
| IP100025087 | Isoform 1 of Cellular tumor antigen p53                                                     | KKPLDGEYFLQIR        | 128.57             | 3.458  | 596.6416011  | 3 | -0.00073   | -0.488  | 320  | 333  |
| IP100030275 | Heat shock protein 75 kDa, mitochondrial                                                    | NiYlCAPNR            | 61.94              | 2.143  | 682.2978512  | 2 | 0.000886   | 0.649   | 496  | 505  |
| IP100221092 | 40S ribosomal protein S16                                                                   | VKGGHVAQyAIR         | 1000               | 1.918  | 516.93988    | 3 | -0.00134   | -0.863  | 72   | 85   |
| IP100221092 | 40S ribosomal protein S16                                                                   | GGGHVAQyAIR          | 1000               | 3.106  | 441.2189022  | 3 | -0.00087   | -0.658  | 74   | 85   |
| IP100909921 | cDNA FLJ60146, highly similar to JimC domain-containing histone demethylation YREDYEPALYR   | YREDYEPALYR          | 47.48              | 1.45   | 834.3769528  | 2 | -0.00105   | -0.627  | 539  | 550  |
| IP100909921 | cDNA FLJ60146, highly similar to JimC domain-containing histone demethylation YREDYEPALYR   | YREDYEPALYR          | 19.23, 179.75      | 2.783  | 583.2417598  | 3 | -0.00383   | -2.19   | 539  | 550  |
| IP100647915 | 24 kDa protein                                                                              | GASQAGMTGyGMPR       | 50.64              | 2.974  | 732.2941281  | 2 | -0.000995  | -0.68   | 204  | 217  |
| IP100647915 | 24 kDa protein                                                                              | GPAYGLSR             | 93.05              | 1.846  | 450.7025449  | 2 | -0.000862  | -0.957  | 26   | 33   |
| IP100019996 | SAFB-like transcription modulator isoform b                                                 | RDDPyWSENK           | 95.92              | 2.238  | 695.2775265  | 2 | -0.000498  | -0.359  | 718  | 727  |
| IP100019996 | SAFB-like transcription modulator isoform b                                                 | RDDPyWSENK           | 104.74             | 2.502  | 506.5525508  | 3 | -0.000724  | -0.477  | 718  | 728  |
| IP100019996 | SAFB-like transcription modulator isoform b                                                 | REDPSFERyPK          | 107.72             | 1.121  | 801.8927913  | 3 | -0.000703  | -0.467  | 793  | 803  |
| IP100910763 | Uncharacterized protein                                                                     | DYSGyQR              | 54.16              | 1.51   | 484.6792905  | 2 | -0.000771  | -0.796  | 340  | 346  |
| IP100003847 | Zinc finger protein 324A                                                                    | KPTGVSVIyWER         | 159.98             | 2.988  | 505.5850826  | 3 | -0.00133   | -0.877  | 135  | 146  |
| IP100003847 | Zinc finger protein 324A                                                                    | ERKPTGVSVIyWER       | 132.33             | 2.758  | 600.6329342  | 3 | -0.00147   | -0.819  | 133  | 146  |
| IP100004273 | Isoform 1 of RNA-binding protein 25                                                         | DREDEEDAYER          | 1000               | 2.458  | 448.6758418  | 4 | -0.00253   | -1.41   | 432  | 444  |
| IP100004273 | Isoform 1 of RNA-binding protein 25                                                         | EFLDYDDDRDDyPKYR     | 24.95              | 3.484  | 778.6461788  | 3 | -0.00144   | -0.617  | 498  | 514  |
| IP100004273 | Isoform 1 of RNA-binding protein 25                                                         | DREDEEDAYER          | 1000               | 4.238  | 545.865356   | 3 | -0.000909  | -0.555  | 432  | 443  |
| IP100419258 | High mobility group protein B1                                                              | YEKDIAYR             | 201.33             | 2.647  | 403.5165706  | 3 | -0.00126   | -1.05   | 155  | 163  |
| IP100419258 | High mobility group protein B1                                                              | RPPSAFFLFCSEyRk      | 47.48              | 3.751  | 694.6614986  | 3 | 0.00155    | 0.746   | 97   | 112  |
| IP100419258 | High mobility group protein B1                                                              | MSSyAFFVQYR          | 30.97              | 2.904  | 788.8210446  | 2 | 0.00117    | 0.87    | 13   | 24   |
| IP100292975 | RNA-binding protein 27                                                                      | MiYSSNLK             | 53.98              | 1.408  | 561.7494504  | 2 | 0.000449   | 0.4     | 787  | 795  |
| IP100292975 | RNA-binding protein 27                                                                      | DYDRyYER             | 23.98              | 1.776  | 630.2403561  | 2 | -0.000539  | -0.428  | 145  | 152  |
| IP100292975 | RNA-binding protein 27                                                                      | EkyDWR               | 1000               | 0.9311 | 488.7005307  | 2 | 0.00021    | 0.215   | 158  | 163  |
| IP100292975 | RNA-binding protein 27                                                                      | DYDRyYERNELYR        | 20.19              | 3.029  | 484.457458   | 4 | -0.00107   | -0.553  | 145  | 157  |
| IP100292975 | RNA-binding protein 27                                                                      | WRDyDR               | 1000               | 1.346  | 495.6952817  | 2 | -0.000788  | -0.796  | 143  | 148  |
| IP10166500  | E3 SUMO-protein ligase PIAS4                                                                | TLGAPNHIDyPVLYGK     | 117.47             | 4.448  | 899.4458005  | 3 | 0.000649   | 0.361   | 99   | 114  |
| IP100641788 | U1 small nuclear ribonucleoprotein C                                                        | FICdyCDYTLTHDPSVVR   | 77.91              | 3.428  | 793.6425167  | 3 | 0.00184    | 0.775   | 25   | 42   |
| IP100641788 | U1 small nuclear ribonucleoprotein C                                                        | ENWKDYQK             | 0                  | 1.164  | 633.7745969  | 2 | 0.000542   | 0.428   | 53   | 61   |
| IP10102661  | TPX2, microtubule-associated, homolog (Xenopus laevis), isoform CRA_a                       | AQPVPYHGYVFPKQPIPEAR | 1000               | 2.529  | 737.7098995  | 3 | 0.00222    | 1       | 549  | 567  |
| IP10102661  | TPX2, microtubule-associated, homolog (Xenopus laevis), isoform CRA_a                       | NQEYKEVNTFSLELR      | 175.07             | 3.679  | 655.9581295  | 3 | -0.000788  | -0.401  | 274  | 288  |
| IP10102661  | TPX2, microtubule-associated, homolog (Xenopus laevis), isoform CRA_a                       | KANLQALVTLPLKVPDNTYK | 17.78              | 3.989  | 621.822466   | 4 | -0.00112   | -0.449  | 63   | 83   |
| IP100456758 | 60S ribosomal protein L27a                                                                  | INFDKYPHGyGK         | 109.69             | 2.964  | 555.9205928  | 3 | -0.000688  | -0.419  | 43   | 55   |
| IP101014521 | cDNA FLJ56994, highly similar to Zinc finger protein 460                                    | HQWHTGKPYVCLQCGK     | 70.97              | 4.261  | 581.0142207  | 4 | -0.00295   | -1.27   | 397  | 414  |
| IP101014521 | cDNA FLJ56994, highly similar to Zinc finger protein 460                                    | HFSHTGKPYVEyCGEK     | 40.75              | 3.365  | 565.2399898  | 4 | -0.00487   | -2.16   | 425  | 444  |
| IP101014521 | cDNA FLJ56994, highly similar to Zinc finger protein 460                                    | HFNHTGKPYECLQCGK     | 51.64              | 2.249  | 575.2516475  | 4 | -0.000842  | -0.367  | 369  | 386  |
| IP100893431 | cDNA FLJ53410, highly similar to Eukaryotic translation initiation factor 3 subunitINGDYLYK | INGDYLYK             | 1000               | 2.534  | 524.7125241  | 2 | -0.000369  | -0.352  | 446  | 453  |
| IP101010755 | cDNA FLJ57326, highly similar to ATP-dependent RNA helicase DDX1                            | EKWVHYVCSRS          | 103.45             | 2.812  | 510.890472   | 3 | -0.000626  | -0.409  | 498  | 506  |
| IP101010755 | cDNA FLJ57326, highly similar to ATP-dependent RNA helicase DDX1                            | VWYHVCSRS            | 122.98             | 2.153  | 425.1776424  | 3 | -0.00151   | -1.19   | 496  | 506  |
| IP100889541 | Isoform 4 of Probable ATP-dependent RNA helicase DDX17                                      | ALPDLyPFGTMR         | 24.95              | 2.345  | 779.3632199  | 2 | 0.000688   | 0.442   | 69   | 81   |
| IP100889541 | Isoform 4 of Probable ATP-dependent RNA helicase DDX17                                      | TSSANPNMLyQDECDR     | 56.83              | 2.532  | 784.6510006  | 3 | -0.00134   | -0.57   | 569  | 587  |
| IP100000494 | 60S ribosomal protein L5                                                                    | TdyYAR               | 58.41              | 2.105  | 434.6656796  | 2 | -0.000692  | -0.797  | 28   | 33   |
| IP100000494 | 60S ribosomal protein L5                                                                    | TdyYARK              | 58.42              | 1.147  | 498.7413109  | 2 | -0.000844  | -0.847  | 28   | 34   |
| IP100000494 | 60S ribosomal protein L5                                                                    | EGKTDyYAR            | 27.96              | 1.853  | 591.74533    | 2 | -0.000552  | -0.466  | 25   | 33   |
| IP100291939 | Structural maintenance of chromosomes protein 1A                                            | AEEDTFNHYR           | 81.39              | 2.253  | 745.2936398  | 2 | 0.00453    | 3.04    | 178  | 188  |
| IP100291939 | Structural maintenance of chromosomes protein 1A                                            | EMWKAEDTFQFHYR       | 103.45             | 2.841  | 659.6119381  | 3 | -0.00126   | -0.639  | 174  | 188  |
| IP100168859 | myc-associated zinc finger protein isoform 2                                                | MLSSAyISDHMK         | 47.48              | 2.044  | 488.2092281  | 3 | 0.000808   | 0.552   | 400  | 411  |
| IP100168859 | myc-associated zinc finger protein isoform 2                                                | LSHSDKPYQCPVQQR      | 80.48              | 3.12   | 737.9824215  | 3 | -0.000243  | -0.11   | 299  | 315  |
| IP100168859 | myc-associated zinc finger protein isoform 2                                                | MShYHR               | 58.42              | 1.752  | 436.6780698  | 2 | -0.000612  | -0.702  | 322  | 327  |
| IP100168859 | myc-associated zinc finger protein isoform 2                                                | GFTTAYLR             | 67.98              | 2.132  | 540.2499386  | 2 | -0.000674  | -0.625  | 427  | 435  |
| IP100012795 | Eukaryotic translation initiation factor 3 subunit 1                                        | SYSSGGEDyVR          | 117.08             | 2.748  | 678.7590939  | 2 | -0.000564  | -0.416  | 299  | 310  |
| IP100011676 | Neural Wiskott-Aldrich syndrome protein                                                     | VlyDFIEK             | 1000               | 1.826  | 553.7625119  | 2 | -0.000428  | -0.387  | 254  | 261  |
| IP100399170 | Isoform 2 of Regulator of nonsense transcripts 1                                            | IAYFTLTK             | 50.64              | 1.624  | 516.7629391  | 2 | 0.000827   | 0.801   | 342  | 349  |
| IP100893918 | Valyl-tRNA synthetase                                                                       | GDRlyHQLK            | 1000               | 2.222  | 403.8641964  | 3 | -0.00139   | -1.15   | 424  | 432  |
| IP100853433 | Uncharacterized protein                                                                     | IMEYEEK              | 30.97              | 1.56   | 528.2116696  | 2 | -0.000612  | -0.58   | 54   | 60   |
| IP100853433 | Uncharacterized protein                                                                     | IMEYEEK              | 52.4               | 1.793  | 592.2590939  | 2 | -0.000764  | -0.645  | 54   | 61   |
| IP100000728 | Isoform 1 of Ubiquitin carboxyl-terminal hydrolase 15                                       | NSNyLPSyTAYK         | 95.92              | 3.156  | 830.8403317  | 2 | 0.00105    | 0.63    | 260  | 272  |
| IP100000728 | Isoform 1 of Ubiquitin carboxyl-terminal hydrolase 15                                       | NyDYSEGR             | 30.97              | 1.637  | 590.7195431  | 2 | 0.0000347  | 0.0294  | 273  | 281  |
| IP100945276 | Uncharacterized protein                                                                     | HNYyFENYR            | 24.95              | 2.281  | 457.1958614  | 3 | -0.000992  | -0.725  | 89   | 97   |
| IP100013654 | Isoform 2 of Dynactin subunit 3                                                             | YLDEyIDR             | 162.6              | 1.86   | 632.2683173  | 2 | -0.00111   | -0.878  | 67   | 75   |
| IP100642944 | Poly(A) binding protein, cytoplasmic 4 (Inducible form), isoform CRA_e                      | KAHLNTQyMQR          | 49.77              | 1.568  | 490.5621029  | 3 | -0.00117   | -1.27   | 375  | 385  |
| IP100642944 | Poly(A) binding protein, cytoplasmic 4 (Inducible form), isoform CRA_e                      | IYVSKPLyVALAQR       | 103.33             | 3.269  | 532.2957149  | 3 | -0.000832  | -0.522  | 357  | 370  |
| IP100554788 | Keratin, type I cytoskeletal 18                                                             | STFSTNYR             | 54.16              | 1.938  | 528.21133786 | 2 | -0.000894  | -0.847  | 7    | 14   |
| IP100794894 | Protein                                                                                     | LDHyAIIK             | 1000               |        |              |   |            |         |      |      |

|             |                                                                                |                         |               |       |             |   |            |          |      |      |
|-------------|--------------------------------------------------------------------------------|-------------------------|---------------|-------|-------------|---|------------|----------|------|------|
| IP100549296 | Isoform 1 of SAP30-binding protein                                             | NPSIYEK                 | 60.18         | 1.343 | 465.7024228 | 2 | -0.000406  | -0.436   | 161  | 167  |
| IP100297900 | Probable ATP-dependent RNA helicase DDX10                                      | NPEYVWVHEK              | 1000          | 2.061 | 460.8711238 | 3 | -0.00121   | -0.873   | 270  | 279  |
| IP100297900 | Probable ATP-dependent RNA helicase DDX10                                      | LSLKNPEYVWVHEK          | 192.51        | 3.342 | 607.9703365 | 3 | 0.00123    | 0.677    | 266  | 279  |
| IP100163084 | Pre-mRNA-splicing factor SF1F                                                  | AEYFDGSEPPQNR           | 195.43        | 3.593 | 796.3253171 | 2 | -0.000217  | -0.137   | 467  | 479  |
| IP100163084 | Pre-mRNA-splicing factor SF1F                                                  | RAEYFDGSEPPQNR          | 142.88        | 3.893 | 583.2531734 | 3 | -0.000256  | -0.147   | 466  | 479  |
| IP100976263 | Protein                                                                        | LCDFGASHVANDNDITPYLVSR  | 57.6          | 5.343 | 839.709045  | 3 | -0.000807  | -0.321   | 336  | 357  |
| IP100008557 | Insulin-like growth factor 2 mRNA-binding protein 1                            | SGYAFVDCPDEHWAMK        | 20.98         | 4.001 | 664.9273677 | 3 | 0.000161   | 0.081    | 37   | 37   |
| IP100177381 | Pre-mRNA-splicing factor CWC22 homolog                                         | DRDYFDYSR               | 105.08        | 2.55  | 658.7511594 | 2 | -0.000433  | -0.329   | 42   | 50   |
| IP100215790 | 60S ribosomal protein L3B                                                      | YLYTLVITDKKE            | 29.21         | 3.017 | 783.3967282 | 2 | -0.0014    | -0.891   | 41   | 52   |
| IP100215790 | 60S ribosomal protein L3B                                                      | YLYTLVITDKKE            | 112.12, 61.94 | 2.656 | 823.3810422 | 2 | 0.000901   | 0.548    | 41   | 52   |
| IP100465140 | Transcriptional regulator Kaiso                                                | HDDHYELVDGR             | 1000          | 3.703 | 516.887939  | 3 | -0.000459  | -0.297   | 481  | 492  |
| IP100465140 | Transcriptional regulator Kaiso                                                | QVAYLSDR                | 68.84         | 1.833 | 548.2294308 | 2 | -0.00019   | -0.173   | 597  | 604  |
| IP100026167 | NHP2-like protein 1                                                            | LLDLVQQSclhYK           | 70.88         | 3.122 | 780.8610226 | 2 | 0.000728   | 0.467    | 22   | 33   |
| IP100026167 | NHP2-like protein 1                                                            | KLLDLVQQSclhYK          | 69.51         | 2.026 | 563.6080928 | 3 | 0.000137   | 0.0809   | 21   | 33   |
| IP100965354 | Uncharacterized protein                                                        | DVGLADRFEeYK            | 1000          | 1.511 | 540.2430416 | 3 | -0.00215   | -1.33    | 98   | 110  |
| IP100718985 | Isoform 2 of Glucocorticoid receptor DNA-binding factor 1                      | NEENIYSPVHDSTQGK        | 54.16         | 3.532 | 676.2841182 | 3 | -0.00292   | -1.44    | 1099 | 1115 |
| IP100910915 | cDNA FLJ54756, moderately similar to Homo sapiens nitric oxide synthase intera | NCTAGAVTYTHEK           | 27.96         | 2.096 | 531.885497  | 3 | -0.000449  | -0.0307  | 7    | 19   |
| IP100910915 | cDNA FLJ54756, moderately similar to Homo sapiens nitric oxide synthase intera | NCTAGAVTYTHEK           | 27.96         | 2.89  | 574.5836177 | 3 | -0.000689  | -0.4     | 7    | 20   |
| IP100221394 | H/ACA ribonucleoprotein complex subunit 4                                      | QEVVDYSESAK             | 79.9          | 1.621 | 763.8244626 | 2 | -0.000526  | -0.345   | 414  | 425  |
| IP100221394 | H/ACA ribonucleoprotein complex subunit 4                                      | QEVVDYSESAK             | 79.9          | 1.332 | 699.7772214 | 2 | -0.0000882 | -0.0063  | 414  | 424  |
| IP100221394 | H/ACA ribonucleoprotein complex subunit 4                                      | HGKPTDSTPATWQEVVDYSESAK | 34.14         | 3.49  | 702.066347  | 4 | 0.000777   | 0.277    | 401  | 424  |
| IP100170786 | WW domain-binding protein 11                                                   | LYEKENPDIYKELR          | 331.11        | 4.091 | 630.6418453 | 3 | 0.00446    | 2.47     | 95   | 108  |
| IP100170786 | WW domain-binding protein 11                                                   | ENPDIYKELR              | 1000          | 1.954 | 452.8778987 | 3 | -0.00218   | -1.61    | 99   | 108  |
| IP100306369 | RNA (cytosine-5-)-methyltransferase NSUN2                                      | KLSSEYISQAK             | 27.96         | 2.366 | 441.2062679 | 3 | -0.000973  | -0.736   | 640  | 650  |
| IP100306369 | RNA (cytosine-5-)-methyltransferase NSUN2                                      | LFEHYIQELK              | 27.96         | 1.683 | 483.8869014 | 3 | -0.000572  | -0.395   | 47   | 56   |
| IP100306369 | RNA (cytosine-5-)-methyltransferase NSUN2                                      | QLYMVSK                 | 74.63         | 2.009 | 474.7170102 | 2 | -0.000431  | -0.455   | 559  | 565  |
| IP100377011 | ubiquitin-conjugating enzyme E2 E1 isoform 2                                   | GDNLYEWR                | 1000          | 2.616 | 566.7267453 | 2 | -0.000861  | -0.76    | 56   | 63   |
| IP100646890 | 64 kDa protein                                                                 | SSDANPAYYESWNR          | 112.12        | 3.625 | 951.8706662 | 2 | 0.0000808  | 0.0425   | 361  | 373  |
| IP100102997 | Isoform 2 of ATPase WRNIP1                                                     | AGEEHYNGISALHK          | 142.88        | 2.607 | 570.2429805 | 3 | -0.0022    | -1.29    | 470  | 485  |
| IP100102997 | Isoform 2 of ATPase WRNIP1                                                     | MLEGGEDPLYARR           | 1000          | 1.707 | 765.3393552 | 2 | -0.000441  | -0.288   | 500  | 512  |
| IP100102997 | Isoform 2 of ATPase WRNIP1                                                     | MLEGGEDPLYARR           | 1000          | 1.139 | 562.5958248 | 3 | -0.000602  | -0.357   | 500  | 513  |
| IP100607820 | Isoform 2 of H/ACA ribonucleoprotein complex subunit 1                         | LQKFIIDPYK              | 134.16        | 2.009 | 465.5638729 | 3 | -0.000358  | -0.257   | 141  | 150  |
| IP100607820 | Isoform 2 of H/ACA ribonucleoprotein complex subunit 1                         | FYIDPIK                 | 160.79        | 2.239 | 513.2230832 | 2 | -0.000285  | -0.278   | 144  | 150  |
| IP100607820 | Isoform 2 of H/ACA ribonucleoprotein complex subunit 1                         | CTTDENKVPVFNAPVLENK     | 110.61        | 3.582 | 828.0380245 | 3 | -0.00187   | -0.753   | 88   | 107  |
| IP100607820 | Isoform 2 of H/ACA ribonucleoprotein complex subunit 1                         | KLQKFIIDPYK             | 150.86        | 3.048 | 508.2622066 | 3 | -0.000357  | -0.234   | 140  | 150  |
| IP101016009 | cDNA FLJ51486                                                                  | STSQLVLPQDPIINPR        | 126.67        | 1.788 | 642.3105465 | 3 | -0.00114   | -0.591   | 85   | 100  |
| IP100719549 | RBM14-RBM4 protein isoform 1                                                   | YEREQVADR               | 74.6          | 1.32  | 655.2642819 | 2 | -0.000688  | -0.525   | 325  | 333  |
| IP100719549 | RBM14-RBM4 protein isoform 1                                                   | NSLYDMAR                | 89.89         | 2.442 | 525.103268  | 2 | 0.000102   | 0.0973   | 317  | 324  |
| IP100719549 | RBM14-RBM4 protein isoform 1                                                   | VADLTEQYNEQVAVR         | 53.49         | 2.39  | 968.4288327 | 2 | 0.000814   | 0.42     | 158  | 173  |
| IP100140420 | Staphylococcal nuclease domain-containing protein 1                            | IWRDQVAFNTANLQDK        | 155.18        | 3.426 | 623.9688106 | 3 | 0.000555   | 0.297    | 325  | 339  |
| IP100654603 | Isoform 2 of Girdin                                                            | DSNPYALTR               | 44.63         | 1.752 | 607.2667233 | 2 | 0.000951   | 0.0784   | 1767 | 1776 |
| IP100607575 | Retinoid X receptor, beta                                                      | HYGVYSIGEGK             | 50.64         | 3.137 | 480.5093685 | 3 | -0.00102   | -0.0707  | 216  | 226  |
| IP100477803 | Putative uncharacterized protein DKFZp781L0540 (Fragment)                      | IDIDYQK                 | 1000          | 2.037 | 487.7154233 | 2 | -0.000805  | -0.826   | 468  | 474  |
| IP100477803 | Putative uncharacterized protein DKFZp781L0540 (Fragment)                      | MKGIDIDYQK              | 1000          | 2.376 | 430.8650508 | 3 | -0.00132   | -1.03    | 465  | 474  |
| IP100793060 | nuclear receptor corepressor 1 isoform 2                                       | TREYEEK                 | 30.97         | 1.692 | 534.7237546 | 2 | -0.000642  | -0.601   | 229  | 235  |
| IP100746412 | Isoform 1 of Protein SCAF11                                                    | TLPADVQNYYSR            | 27.96         | 2.176 | 753.8352048 | 2 | -0.000442  | -0.293   | 1153 | 1164 |
| IP100746412 | Isoform 1 of Protein SCAF11                                                    | KTLPADVQNYYSR           | 27.96         | 2.229 | 545.590942  | 2 | -0.000851  | -0.52    | 1152 | 1164 |
| IP100022521 | Isoform 2 of Dual specificity tyrosine-phosphorylation-regulated kinase 2      | VTYIQSR                 | 27.96         | 1.887 | 555.2558591 | 2 | 0.000667   | 0.601    | 306  | 313  |
| IP100927608 | Uncharacterized protein                                                        | DLQDDYR                 | 1000          | 1.596 | 566.719299  | 2 | -0.000654  | -0.577   | 307  | 314  |
| IP100927608 | Uncharacterized protein                                                        | QSEQLAYLERR             | 174.76        | 3.211 | 534.5824581 | 3 | -0.000802  | -0.501   | 860  | 871  |
| IP100927608 | Uncharacterized protein                                                        | IKQSEQLAYLERR           | 67.83         | 1.878 | 614.9752803 | 3 | -0.00144   | -0.779   | 858  | 871  |
| IP100927608 | Uncharacterized protein                                                        | QSEQLAYLERR             | 239.46        | 3.337 | 723.3198239 | 2 | 0.000396   | 0.274    | 860  | 870  |
| IP101046472 | mRNA-decapping enzyme 1A                                                       | SASPVHGFTLVNR           | 98.4          | 3.113 | 510.2364488 | 3 | -0.00123   | -0.803   | 60   | 72   |
| IP100967365 | Uncharacterized protein                                                        | RDGVNKDYETEELISTTANYR   | 37.77         | 4.017 | 852.0534664 | 3 | -0.00168   | -0.657   | 114  | 134  |
| IP100967365 | Uncharacterized protein                                                        | DGVNKDYETEELISTTANYR    | 64.24, 69.51  | 3.747 | 826.6757198 | 3 | -0.000149  | -0.06    | 115  | 134  |
| IP100967365 | Uncharacterized protein                                                        | DGVNKDYETEELISTTANYR    | 43.77         | 3.026 | 800.0197139 | 3 | -0.000183  | -0.765   | 115  | 134  |
| IP100006379 | Nucleolar protein 58                                                           | YGLYHASLVGQTSFK         | 96.95         | 4.605 | 605.301147  | 3 | -0.00134   | -0.736   | 338  | 353  |
| IP100006379 | Nucleolar protein 58                                                           | TQLVEYLQNR              | 81.61         | 2.502 | 704.3192136 | 2 | -0.000424  | -0.302   | 269  | 278  |
| IP100000874 | Peroxiredoxin-1                                                                | SKEVFSK                 | 111.84        | 2.57  | 484.7100217 | 2 | -0.000808  | -0.835   | 191  | 197  |
| IP100479186 | Isoform M2 of Pyruvate kinase isozymes M1/M2                                   | LNFSHGTHEYHAETIK        | 46.13         | 2.596 | 491.7232661 | 4 | -0.000837  | -0.426   | 74   | 89   |
| IP100300371 | Isoform 1 of Splicing factor 3B subunit 3                                      | HIANYISGQITGHR          | 78.2          | 4.237 | 587.2945552 | 3 | 0.00339    | 1.93     | 985  | 999  |
| IP100026970 | FACT complex subunit SPT16                                                     | DLYIRPNIQAK             | 1000          | 1.803 | 470.9101558 | 3 | -0.0000909 | -0.00644 | 664  | 674  |
| IP100026970 | FACT complex subunit SPT16                                                     | LKDLYIRPNIQAK           | 1000          | 2.336 | 551.3026119 | 3 | -0.00174   | -1.05    | 662  | 674  |
| IP101013558 | cDNA FLJ56464, highly similar to Fetal Alzheimer antigen                       | GNINNYFK                | 1000          | 2.227 | 525.226257  | 2 | -0.00104   | -0.989   | 740  | 747  |
| IP100888085 | Isoform 4 of Serrate RNA effector molecule homolog                             | SRGEYRDYDR              | 81.6          | 2.69  | 466.1930233 | 3 | -0.00131   | -0.936   | 51   | 60   |
| IP100888085 | Isoform 4 of Serrate RNA effector molecule homolog                             | AIVEYR                  | 1000          | 1.535 | 415.694183  | 2 | -0.000785  | -0.946   | 855  | 860  |
| IP100640632 | RDD1 regulator of differentiation 1                                            | SQPVYIQYSNHR            | 57.6          | 2.246 | 524.5721431 | 3 | 0.0000528  | 0.0336   | 28   | 39   |
| IP100176642 | Serine/threonine-protein kinase 12                                             | FGNVLYAR                | 1000          | 2.072 | 510.2395322 | 2 | -0.000287  | -0.282   | 88   | 95   |
| IP100176642 | Serine/threonine-protein kinase 12                                             | ENSPWPYGR               | 30.97         | 2.18  | 674.7723386 | 2 | 0.000526   | 0.39     | 5    | 14   |
| IP100418240 | nebulin isoform 2                                                              | KPYNIANYFK              | 156.26        | 2.89  | 453.1965549 | 3 | -0.00218   | -1.6     | 50   | 59   |
| IP100176637 | Eukaryotic translation initiation factor 2 subunit 2-like protein              | LYFLQETGHR              | 272.95        | 2.39  | 565.2340694 | 3 | -0.000299  | -0.177   | 291  | 302  |
| IP100333010 | Calcium homeostasis endoplasmic reticulum protein                              | SYSFIAR                 | 0             | 2.035 | 462.20462   | 2 | -0.00131   | -1.42    | 902  | 908  |
| IP100333010 | Calcium homeostasis endoplasmic reticulum protein                              | GGVVALDDPPEYNYR         | 34.27         | 3.09  | 601.93988   | 3 | -0.00284   | -1.57    | 885  | 899  |
| IP100333010 | Calcium homeostasis endoplasmic reticulum protein                              | NKSYFIAR                | 21.95         | 2.387 | 583.2740475 | 2 | -0.000356  | -0.306   | 900  | 908  |
| IP100513712 | Isoform 2 of Zinc finger protein 598                                           | RNEGVVGGEDYEEDVYSR      | 68.9          | 2.346 | 770.3324581 | 3 | -0.00119   | -0.824   | 296  | 314  |
| IP100513712 | Isoform 2 of Zinc finger protein 598                                           | RNEGVVGGEDYEEDVYSR      | 1000          | 3.218 | 634.9341426 | 3 | -0.000449  | -0.236   | 296  | 311  |
| IP100180454 | Probable U3 small nucleolar RNA-associated protein 11                          | ALEKNPDEFYK             | 23.2          | 2.999 | 532.9044796 | 3 | -0.00104   | -0.65    | 58   | 69   |
| IP100180454 | Probable U3 small nucleolar RNA-associated protein 11                          | NPDEFYK                 | 23.98         | 1.772 | 578.2239377 | 2 | 0.000238   | 0.0206   | 62   | 69   |
| IP100180454 | Probable U3 small nucleolar RNA-associated protein 11                          | KALEKNPDEFYK            | 21.95         | 4.191 | 575.60321   | 3 | 0.000154   | 0.089    | 57   | 69   |
| IP100985393 | Protein                                                                        | TPQEYLR                 | 138.72        | 2.066 | 493.7211606 | 2 | -0.00043   | -0.436   | 43   | 49   |
| IP101015368 | 111 kDa protein                                                                | LAYVAPTIRK              | 174.36        | 2.241 | 590.8103635 | 2 | -0.000325  | -0.275   | 494  | 503  |
| IP100736859 | Isoform 4 of Heterogeneous nuclear ribonucleoprotein U-like protein 1          | QNQFYDTQVYKQENESGYER    | 18.95         | 3.382 | 852.702775  | 3 | 0.00165    | 0.645    | 7    | 26   |
| IP100736859 | Isoform 4 of Heterogeneous nuclear ribonucleoprotein U-like protein 1          | QENESGYER               | 68.84         | 1.851 | 596.2199094 | 2 | 0.0000672  | 0.0564   | 18   | 26   |
| IP100736859 | Isoform 4 of Heterogeneous nuclear ribonucleoprotein U-like protein 1          | GRGVFEHREDR             | 1000          | 2.085 | 501.2156368 | 3 | -0.00257   | -1.71    | 80   | 90   |
| IP100795303 | cDNA FLJ50996, highly similar to 60S ribosomal protein L4                      | NNRQPVAVSELGHQTSAESWGTR | 129.75        | 4.974 | 699.8173213 | 4 | -0.00332   | -1.19    | 47   | 71   |
| IP100795303 | cDNA FLJ50996, highly similar to 60S ribosomal protein L4                      | QPVAVSELGHQTSAESWGTR    | 23.2          | 2.384 | 804.6915889 | 3 | -0.00311   | -1.29    | 50   | 71   |
| IP100411690 | Isoform 2 of La-related protein 1                                              | THFDYQGLR               | 103.45        | 1.742 | 471.860107  | 3 | 0.00174    | 1.23     | 280  | 289  |
| IP100922490 | Isoform 3 of Aryl hydrocarbon receptor nuclear translocator                    | FSEIHNINADQSK           | 100.09        | 2.731 | 873.3803708 | 2 | -0.00071   | -0.4     |      |      |

|             |                                                                                                           |                        |               |        |             |   |            |         |      |      |
|-------------|-----------------------------------------------------------------------------------------------------------|------------------------|---------------|--------|-------------|---|------------|---------|------|------|
| IP100294435 | Pre-mRNA-splicing factor SLU7                                                                             | IYEEYAK                | 1000          | 1.708  | 466.2127072 | 2 | -0.000237  | -0.255  | 181  | 187  |
| IP100333215 | Isoform 1 of Transcription elongation factor A protein 1                                                  | DTYVSSFR               | 58.42         | 2.261  | 576.2427975 | 2 | 0.000344   | 0.298   | 124  | 132  |
| IP100903344 | cDNA FLJ40239 fis, clone TEST12023436, highly similar to Peptidyl-prolyl cis-trar/yYFNHITNASQWERSGNSSSGGK |                        | 53.65         | 2.529  | 956.0914913 | 3 | 0.000297   | 0.104   | 22   | 46   |
| IP100304612 | 60S ribosomal protein L13a                                                                                | KFAYLGR                | 1000          | 1.933  | 467.7311703 | 2 | -0.000711  | -0.761  | 134  | 140  |
| IP100304612 | 60S ribosomal protein L13a                                                                                | FAYLGR                 | 1000          | 2.042  | 403.6835324 | 2 | -0.000987  | -1.22   | 135  | 140  |
| IP100304612 | 60S ribosomal protein L13a                                                                                | MNTNPSRGRYHFR          | 30.38         | 2.792  | 552.9082637 | 3 | -0.00149   | -0.897  | 62   | 74   |
| IP100163505 | 50S rRNA-binding protein 39                                                                               | YRSPYSGPK              | 43.97, 23.20  | 2.046  | 405.4931331 | 3 | -0.00111   | -0.913  | 95   | 103  |
| IP100163505 | Isoform 1 of RNA-binding protein 39                                                                       | YRSPYSGPK              | 0             | 1.635  | 567.7515866 | 2 | -0.00318   | -2.8    | 95   | 103  |
| IP100219217 | L-lactate dehydrogenase B chain                                                                           | MVVESAYEVIK            | 48.15         | 2.315  | 674.3169553 | 2 | -0.00104   | -0.773  | 234  | 244  |
| IP100021828 | Cystatin-B                                                                                                | AKHDELYF               | 61.94         | 0.9425 | 602.2577511 | 2 | -0.00115   | -0.955  | 90   | 98   |
| IP100930688 | Tubulin alpha-1B chain                                                                                    | LDHKFDLMYAK            | 1000          | 2.566  | 487.5599056 | 3 | -0.00106   | -0.726  | 391  | 401  |
| IP100014263 | Isoform Long of Eukaryotic translation initiation factor 4H                                               | AySSFGGGR              | 67.96         | 2.254  | 491.195068  | 2 | -0.000815  | -0.831  | 11   | 19   |
| IP100144293 | Isoform 1 of YTH domain-containing protein 1                                                              | SATEYKNEEYQR           | 130.85        | 1.993  | 799.330383  | 2 | -0.000586  | -0.367  | 91   | 102  |
| IP100144293 | Isoform 1 of YTH domain-containing protein 1                                                              | VHDYDMR                | 1000          | 2.165  | 508.1894528 | 2 | 0.000154   | 0.152   | 653  | 659  |
| IP100910194 | cDNA FLJ360565, highly similar to Nuclear pore complex protein Nup153                                     | SvYfKPSLTPSGEFR        | 48.43         | 2.697  | 598.9541011 | 3 | -0.000173  | -0.0965 | 380  | 394  |
| IP100909122 | poly(A)-specific ribonuclease PARN isoform 2                                                              | LlyQTL5WK              | 60.18         | 1.64   | 616.3104245 | 2 | 0.0000974  | 0.0791  | 151  | 159  |
| IP100909122 | poly(A)-specific ribonuclease PARN isoform 2                                                              | KLIYQTL5WK             | 47.48         | 2.004  | 453.9072567 | 3 | -0.00181   | -1.33   | 150  | 159  |
| IP100909122 | poly(A)-specific ribonuclease PARN isoform 2                                                              | IQTAYAEHGR             | 56.2          | 1.624  | 656.2758786 | 2 | -0.000594  | -0.453  | 445  | 454  |
| IP100876972 | Isoform 1 of Inner centromere protein                                                                     | VPSSLAYSLK             | 30.97         | 2.015  | 572.7868039 | 2 | 0.000256   | 0.224   | 907  | 916  |
| IP100876972 | Isoform 1 of Inner centromere protein                                                                     | IChSYLER               | 27.96         | 2.001  | 424.1932674 | 3 | -0.00144   | -1.13   | 353  | 361  |
| IP100793717 | Protein                                                                                                   | QLMLYHR                | 30.97         | 2.125  | 602.2730099 | 2 | -0.000432  | -0.359  | 209  | 216  |
| IP101011129 | cDNA FLJ38453 fis, clone FEBRA2019663, highly similar to Homo sapiens DEAD                                | LNIGGGGLGyR            | 1000          | 2.675  | 578.7789914 | 2 | -0.00167   | -1.44   | 368  | 378  |
| IP101011129 | cDNA FLJ38453 fis, clone FEBRA2019663, highly similar to Homo sapiens DEAD                                | IKLNIIGGGGLGyR         | 1000          | 1.876  | 642.826904  | 2 | -0.000844  | -0.657  | 367  | 378  |
| IP100246058 | Programmed cell death 6-interacting protein                                                               | DNDfYHDRVPLK           | 1000          | 2.506  | 609.6088863 | 3 | -0.000718  | -0.393  | 314  | 327  |
| IP101013367 | T-cell lymphoma invasion and metastasis 2 variant (Fragment)                                              | VFDYEGATSGR            | 102.1         | 1.894  | 500.5450435 | 3 | -0.00135   | -0.898  | 156  | 167  |
| IP101013367 | T-cell lymphoma invasion and metastasis 2 variant (Fragment)                                              | HAQPPPPVQNDPELEK       | 1000          | 2.229  | 718.0097042 | 3 | 0.00154    | 0.714   | 183  | 200  |
| IP101014113 | cDNA FLJ45031 fis, clone BRAWH3018548, highly similar to Vinculin                                         | SFLDSGyR               | 50.64         | 1.796  | 512.7107541 | 2 | -0.000443  | -0.433  | 743  | 750  |
| IP101013569 | Tight Junction protein ZO-1                                                                               | QYFEQYSR               | 128.57        | 1.892  | 600.7391965 | 2 | -0.00206   | -1.71   | 1190 | 1197 |
| IP100909746 | cDNA FLJ51502, highly similar to 60S ribosomal protein L18a                                               | SSGEIVYCGVFEK          | 196           | 3.245  | 841.861633  | 2 | 0.00165    | 0.98    | 57   | 70   |
| IP100909746 | cDNA FLJ51502, highly similar to 60S ribosomal protein L18a                                               | ASGTLREYK              | 84.46         | 1.022  | 552.7580563 | 2 | -0.000839  | -0.76   | 3    | 11   |
| IP100479307 | Isoform 2 of Myosin-10                                                                                    | TGLEDPERYLVDR          | 159.31        | 2.388  | 597.2778233 | 3 | -0.00023   | -0.128  | 5    | 18   |
| IP100413659 | Isoform 2 of Probable alpha-ketoglutarate-dependent dioxygenase ABH5                                      | GSFSSENyWR             | 74.63         | 1.863  | 656.754028  | 2 | 0.000044   | 0.308   | 360  | 369  |
| IP100413659 | Isoform 2 of Probable alpha-ketoglutarate-dependent dioxygenase ABH5                                      | RGFSSENyWR             | 84.93         | 2.548  | 490.2052303 | 3 | -0.000886  | -0.603  | 359  | 369  |
| IP100413659 | Isoform 2 of Probable alpha-ketoglutarate-dependent dioxygenase ABH5                                      | RGFSSENyWR             | 0.00, 43.77   | 1.398  | 516.8605342 | 3 | -0.00131   | -0.843  | 359  | 369  |
| IP100009328 | Eukaryotic initiation factor 4A-III                                                                       | EQYDVyR                | 88.93         | 1.792  | 583.2503400 | 2 | -0.000442  | -0.293  | 199  | 206  |
| IP100030247 | Cyclin-T1                                                                                                 | RWYFTR                 | 54.16         | 1.449  | 504.7265622 | 2 | -0.000327  | -0.324  | 11   | 16   |
| IP100030247 | Cyclin-T1                                                                                                 | WyFTR                  | 74.96         | 1.152  | 426.6761471 | 2 | -0.0000573 | -0.0672 | 12   | 16   |
| IP100030247 | Cyclin-T1                                                                                                 | SQYAYAAQNLLSHHSDSSVSLK | 24.95         | 4.636  | 663.0675044 | 4 | 0.000316   | 0.119   | 416  | 438  |
| IP100377261 | Isoform 1 of Far upstream element-binding protein 3                                                       | AWEDyYK                | 30.97         | 1.675  | 527.7003171 | 2 | 0.000483   | 0.458   | 519  | 525  |
| IP100377261 | Isoform 1 of Far upstream element-binding protein 3                                                       | AWEDyYK                | 26.2          | 1.398  | 591.7475583 | 2 | -0.00035   | -0.0296 | 519  | 526  |
| IP100332552 | Isoform 1 of Zinc finger and BTB domain-containing protein 40                                             | SFHfYcR                | 117.47        | 1.429  | 548.7073971 | 2 | -0.000523  | -0.477  | 744  | 750  |
| IP100332552 | Isoform 1 of Zinc finger and BTB domain-containing protein 40                                             | AyQQLSGLWYHNR          | 128.78        | 2.74   | 572.5948482 | 3 | -0.000632  | -0.368  | 1014 | 1026 |
| IP100290905 | Sorting nexin-2                                                                                           | YLHVGYVPPAPEK          | 21.21         | 2.583  | 554.9475093 | 3 | -0.00295   | -1.77   | 198  | 211  |
| IP100333837 | Isoform 3 of Set1/Ash2 histone methyltransferase complex subunit ASH2                                     | EHPDPSGKPEEYDyK        | 128.35        | 2.551  | 640.5950313 | 3 | -0.000983  | -0.512  | 144  | 159  |
| IP100917171 | 23 kDa protein                                                                                            | EHNPTQyEER             | 49.97         | 2.508  | 461.5176693 | 3 | -0.000469  | -0.339  | 76   | 85   |
| IP100917171 | 23 kDa protein                                                                                            | SIGDQyYR               | 125.88        | 1.205  | 552.2476803 | 3 | -0.00129   | -1.17   | 109  | 117  |
| IP100742682 | Nucleoprotein TPR                                                                                         | TQYEEELK               | 95.92         | 1.736  | 495.7129208 | 2 | -0.00061   | -0.616  | 1443 | 1449 |
| IP100742682 | Nucleoprotein TPR                                                                                         | YKTYEELK               | 54.52         | 2.397  | 427.8637691 | 3 | -0.00127   | -0.99   | 1441 | 1449 |
| IP100337387 | Isoform 3 of Pre-mRNA-processing factor 40 homolog A                                                      | TYNYNTEK               | 61.94         | 2.794  | 631.7528073 | 2 | -0.000437  | -0.346  | 156  | 166  |
| IP100337387 | Isoform 3 of Pre-mRNA-processing factor 40 homolog A                                                      | SDSGKYVYNSQTK          | 27.96         | 2.246  | 573.2418819 | 3 | -0.00113   | -0.658  | 192  | 205  |
| IP100011528 | Cleavage stimulation factor subunit 1                                                                     | TQAVFNHTEYdLLPDER      | 60.5          | 3.668  | 743.0079952 | 3 | -0.000909  | -0.408  | 257  | 374  |
| IP100011528 | Cleavage stimulation factor subunit 1                                                                     | LGHENDTAVQyAIGR        | 137.37        | 2.172  | 916.8987424 | 2 | 0.000433   | 0.236   | 56   | 71   |
| IP100289773 | CCAAT/enhancer-binding protein beta                                                                       | KEEAGAGGGAGGAMAGFPyALR | 1000          | 2.857  | 719.9983516 | 3 | -0.000122  | -0.0564 | 187  | 208  |
| IP100289773 | CCAAT/enhancer-binding protein beta                                                                       | KPAEYGVySLGR           | 0             | 2.003  | 710.33728   | 2 | -0.000692  | -0.487  | 133  | 144  |
| IP100289773 | CCAAT/enhancer-binding protein beta                                                                       | KPAEYGVySLGR           | 118.24, 84.46 | 2.34   | 500.5497127 | 3 | -0.00027   | -0.18   | 133  | 144  |
| IP100010872 | CBX4 protein                                                                                              | SGKYyQLNSK             | 23.2          | 2.802  | 477.5500179 | 2 | -0.00132   | -0.925  | 147  | 157  |
| IP100010872 | CBX4 protein                                                                                              | YyQLNSK                | 27.96         | 2.566  | 579.7473752 | 2 | -0.000301  | -0.26   | 150  | 157  |
| IP100651660 | 60S ribosomal protein L3 isoform b                                                                        | NNASTDYDLSK            | 50.19         | 2.688  | 711.7758176 | 2 | 0.00108    | 0.762   | 252  | 263  |
| IP100550995 | PHD domain-containing protein 1                                                                           | IQLGDLyTPAPGR          | 30.97         | 2.38   | 805.3852536 | 2 | -0.000344  | -0.214  | 187  | 200  |
| IP100010414 | P02 and LIM domain protein 1                                                                              | ERVTFPEGyEVTVFVK       | 68.07         | 2.417  | 676.3361812 | 3 | 0.00367    | 1.81    | 313  | 329  |
| IP10069734  | Zinc finger matrin-type protein 2                                                                         | QKDYDFEER              | 1000          | 1.759  | 655.259155  | 2 | 0.000158   | 0.121   | 137  | 145  |
| IP10069734  | Zinc finger matrin-type protein 2                                                                         | KWDKDEYK               | 1000          | 3.059  | 440.8551937 | 3 | -0.0016    | -1.21   | 15   | 23   |
| IP100011609 | Isoform II of Ubiquitin-protein ligase E3A                                                                | DVTyLTEEK              | 52.4          | 2.183  | 589.2552487 | 2 | -0.000454  | -0.386  | 124  | 132  |
| IP100743813 | Isoform 1 of Abnormal spindle-like microcephaly-associated protein                                        | SNySYFK                | 61.94         | 2.401  | 551.2369992 | 2 | 0.000447   | 0.406   | 459  | 466  |
| IP100981806 | Protein                                                                                                   | NEySLTGLnR             | 61.94         | 2.999  | 703.7908932 | 2 | -0.00363   | -2.58   | 34   | 44   |
| IP100981806 | Protein                                                                                                   | GQyLYMK                | 27.96         | 1.771  | 571.7241818 | 2 | -0.00115   | -1.01   | 62   | 69   |
| IP100964648 | 30 kDa protein                                                                                            | DLKDYFSK               | 102.11        | 1.792  | 548.241821  | 2 | -0.00071   | -0.648  | 45   | 52   |
| IP100964648 | 30 kDa protein                                                                                            | EQyQQQyWGSR            | 197.29        | 2.397  | 823.3413083 | 2 | -0.00133   | -0.811  | 194  | 205  |
| IP100654698 | Isoform 2 of Polyglutamine-binding protein 1                                                              | KDELDPMPSSySDAPR       | 23.2          | 3.524  | 711.2901607 | 3 | 0.00141    | 0.659   | 196  | 213  |
| IP100201401 | Isoform 1 of UPF0690 protein C1orf52                                                                      | SNyVPPPEYTTTEK         | 29.21         | 1.896  | 853.3721921 | 2 | 0.000233   | 0.136   | 102  | 115  |
| IP100291401 | Isoform 1 of UPF0690 protein C1orf52                                                                      | SVTRPAPLyNPLNK         | 76.65         | 2.225  | 567.2910152 | 3 | 0.000669   | 0.0406  | 65   | 78   |
| IP101010145 | cDNA FLJ90464 fis, clone NT2RP3002281, highly similar to RNA-binding protein                              | RLQNFySDQR             | 46.21         | 1.96   | 469.5456539 | 3 | -0.000515  | -0.366  | 319  | 328  |
| IP101010145 | cDNA FLJ90464 fis, clone NT2RP3002281, highly similar to RNA-binding protein                              | RLQNFySDQR             | 30.97         | 2.113  | 625.7635495 | 2 | -0.00145   | -1.16   | 320  | 328  |
| IP10152708  | U3 small nucleolar RNA-associated protein 15 homolog                                                      | ITQDTLWNNYK            | 60.18         | 1.355  | 819.8641354 | 2 | -0.000181  | -0.11   | 19   | 30   |
| IP10152708  | U3 small nucleolar RNA-associated protein 15 homolog                                                      | ELITFKHSDyVR           | 33.56         | 2.575  | 572.9381099 | 3 | -0.00125   | -0.726  | 156  | 168  |
| IP100760919 | Isoform 2 of Regulation of nuclear pre-mRNA domain-containing protein 2                                   | LSDTTEyQPLSSySHR       | 20.2          | 3.51   | 692.9811397 | 3 | -0.000257  | -0.124  | 826  | 842  |
| IP100760919 | Isoform 2 of Regulation of nuclear pre-mRNA domain-containing protein 2                                   | LSDTTEyQPLSSySHR       | 66.42, 24.95  | 3.765  | 719.6363521 | 3 | -0.000952  | -0.441  | 826  | 842  |
| IP100643843 | DNA methyltransferase 1 associated protein 1                                                              | EYVALLYSDKK            | 154.51        | 2.568  | 470.2306514 | 3 | -0.000322  | -0.229  | 56   | 66   |
| IP100647797 | Uncharacterized protein                                                                                   | TLHyEdLVLK             | 86.69         | 3.001  | 485.5757442 | 3 | -0.000409  | -0.281  | 71   | 81   |
| IP100797126 | nascent polypeptide-associated complex subunit alpha isoform a                                            | SPASDyYVfGEAK          | 55.52         | 4.089  | 782.8505856 | 2 | -0.00038   | -0.243  | 1977 | 1990 |
| IP100789674 | cDNA FLJ56271, highly similar to Coatomer subunit beta                                                    | VHMFEAHSDyR            | 41.47         | 3.325  | 528.8938594 | 3 | -0.0011    | -0.693  | 63   | 74   |
| IP100645208 | RNA-binding protein FUS isoform 3                                                                         | TGQPMINLyTDR           | 0             | 2.009  | 744.8311764 | 2 | -0.0015    | -1.01   | 313  | 324  |
| IP100645208 | RNA-binding protein FUS isoform 3                                                                         | TGQPMINLyTDRETK        | 20.19         | 3.925  | 635.292419  | 3 | -0.00122   | -0.641  | 313  | 328  |
| IP100645208 | RNA-binding protein FUS isoform 3                                                                         | KTGQPMINLyTDRETK       | 46.21         | 4.374  | 677.9906002 | 3 | -0.00168   | -0.825  | 312  | 328  |
| IP100792546 | YY1-associated factor 2 isoform 4                                                                         | RQPKPSSDGEyWDCyVCFTR   | 55.7          | 3.085  | 639.5173335 | 4 | -0.0028    | -1.1    | 12   | 31   |
| IP100018974 | Homeobox protein DLX-2                                                                                    | TQyLALPR               | 77.86         | 2.603  | 585.7814938 | 2 | -0.000964  | -0.823  | 174  | 182  |
| IP100952968 | Uncharacterized protein                                                                                   | VQYETEPyHNYR           | 26.99         | 2.639  | 890.3728635 | 2 | -0.000246  | -0.138  | 414  | 426  |
| IP100952968 | Uncharacterized protein                                                                                   | GGQyENFR               | 1000          | 1.475  | 525.7       |   |            |         |      |      |



|             |                                                                                             |                                 |          |             |             |           |           |         |      |      |
|-------------|---------------------------------------------------------------------------------------------|---------------------------------|----------|-------------|-------------|-----------|-----------|---------|------|------|
| IP100645510 | Ubiquitin-fold modifier 1                                                                   | ILTSDPRLPYK                     | 84.87    | 2.038       | 495.2571102 | 3         | -0.000746 | -0.503  | 9    | 20   |
| IP101014295 | 31 kDa protein                                                                              | MNSYPYLADR                      | 27.45    | 2.119       | 655.2679944 | 2         | -0.000764 | -0.583  | 203  | 212  |
| IP101014295 | 31 kDa protein                                                                              | NHDDWSDYDNRR                    | 70.05    | 1.981       | 453.1734614 | 4         | -0.00276  | -1.52   | 242  | 254  |
| IP100103419 | Isoform 1 of SURP and G-patch domain-containing protein 1                                   | EFLYR                           | 30.97    | 1.53        | 485.7077023 | 2         | 0.0000531 | 0.0547  | 230  | 235  |
| IP100103419 | Isoform 1 of SURP and G-patch domain-containing protein 1                                   | EFLYR                           | 30.97    | 1.186       | 549.7550666 | 2         | -0.00022  | -0.201  | 230  | 236  |
| IP100060627 | Coiled-coil domain-containing protein 124                                                   | ELEDAYWKDDDKHVMR                | 1000     | 4.354       | 533.2314448 | 4         | 0.00168   | 0.788   | 33   | 48   |
| IP100916540 | 4 kDa protein                                                                               | LPACVDVDTGVTYK                  | 26.2     | 3.087       | 810.8439328 | 2         | -0.000517 | -0.319  | 5    | 18   |
| IP100827541 | Isoform 2 of RNA-binding protein 26                                                         | FKVYVWR                         | 1000     | 1.983       | 410.2057796 | 3         | -0.00154  | -1.25   | 598  | 605  |
| IP100102815 | Nucleolar complex protein 3 homolog                                                         | IIDKYEK                         | 1000     | 1.454       | 494.7413937 | 2         | -0.000864 | -0.874  | 130  | 136  |
| IP100102815 | Nucleolar complex protein 3 homolog                                                         | IIDKYEKIPR                      | 1000     | 2.314       | 452.2426754 | 3         | -0.00145  | -1.07   | 130  | 139  |
| IP100647664 | Uncharacterized protein                                                                     | cDTQQVFSR                       | 54.16    | 3.039       | 722.7550046 | 2         | -0.000573 | -0.397  | 311  | 320  |
| IP100292221 | Ribosome production factor 1                                                                | YGEVWVHKPR                      | 115.12   | 3.509       | 515.2296749 | 3         | -0.000152 | -0.0984 | 328  | 338  |
| IP100295585 | CGG triplet repeat-binding protein 1                                                        | TALYVTLDR                       | 60.18    | 2.302       | 614.8032223 | 2         | 0.000593  | 0.483   | 17   | 26   |
| IP100295585 | CGG triplet repeat-binding protein 1                                                        | SKTALYVTLDR                     | 48.63    | 2.084       | 481.9132076 | 3         | -0.00105  | -0.73   | 15   | 26   |
| IP100297851 | Isoform 1 of Chromodomain-helicase-DNA-binding protein 1                                    | DWDHYKQDSR                      | 79.3     | 2.359       | 477.1893612 | 3         | -0.00149  | -1.04   | 1587 | 1596 |
| IP100465100 | Isoform 2 of Zinc finger protein 574                                                        | APLSSSTHYECVDK                  | 65.46    | 2.634       | 681.9569088 | 3         | -0.000781 | -0.382  | 206  | 222  |
| IP100465100 | Isoform 2 of Zinc finger protein 574                                                        | FLYHR                           | 1000     | 1.169       | 408.1834408 | 2         | -0.00147  | -1.8    | 496  | 500  |
| IP100256605 | Isoform 1 of WW domain-containing adapter protein with coiled-coil                          | RGDSQPYQALK                     | 74.63    | 2.815       | 671.811279  | 2         | -0.00109  | -0.815  | 19   | 29   |
| IP100337660 | Isoform 3 of Serine/threonine-protein kinase toubled-like 2                                 | ISDYFER                         | 97.75    | 1.796       | 505.205444  | 2         | -0.000164 | -0.162  | 84   | 90   |
| IP100000162 | Isoform 1 of Neuroguin                                                                      | EQYSDAPEIR                      | 30.97    | 1.95        | 708.7879025 | 2         | -0.000547 | -0.386  | 211  | 221  |
| IP100000162 | Isoform 1 of Neuroguin                                                                      | ELKEQYSDAPEIR                   | 27.96    | 3.105       | 596.268127  | 3         | -0.0015   | -0.837  | 208  | 221  |
| IP100000162 | Isoform 1 of Neuroguin                                                                      | INyEESMVR                       | 124.16   | 2.888       | 676.2752072 | 2         | -0.000137 | -0.101  | 239  | 248  |
| IP100017630 | Nuclear fragile X mental retardation-interacting protein 1                                  | DYHlyQTLFPR                     | 40.26    | 2.004       | 554.9032589 | 3         | -0.0013   | -0.782  | 437  | 448  |
| IP100419575 | Uncharacterised protein family UPF0363 protein                                              | ASVEKGDYEAHQMYR                 | 20.98    | 2.841       | 676.2840572 | 3         | -0.000505 | -0.249  | 33   | 48   |
| IP100419575 | Uncharacterised protein family UPF0363 protein                                              | GDYEAHQMYR                      | 24.95    | 2.833       | 504.8586116 | 3         | -0.00174  | -1.15   | 38   | 48   |
| IP100470498 | Isoform 3 of Plasminogen activator inhibitor 1 RNA-binding protein                          | SFSFHYGLKHEDKR                  | 0        | 4.004       | 465.2123103 | 4         | -0.00276  | -1.49   | 202  | 216  |
| IP100470498 | Isoform 3 of Plasminogen activator inhibitor 1 RNA-binding protein                          | SFSFHYGLKHEDK                   | 16.24    | 1.839       | 426.1875911 | 4         | -0.000537 | -0.316  | 202  | 215  |
| IP100470498 | Isoform 3 of Plasminogen activator inhibitor 1 RNA-binding protein                          | SFSFHYGLK                       | 51.06    | 2.852       | 596.7556149 | 2         | -0.000522 | -0.437  | 202  | 211  |
| IP100216691 | Profilin-1                                                                                  | cyEMASHLR                       | 163.22   | 2.649       | 416.1630855 | 3         | -0.00139  | -1.11   | 128  | 136  |
| IP100012198 | Uncharacterized protein C1orf50                                                             | ESGQQVSIISPK                    | 60.18    | 2.142       | 662.3593747 | 2         | 0.0012    | 0.766   | 126  | 138  |
| IP100221089 | 40S ribosomal protein S13                                                                   | GLSQSALPYR                      | 70.16    | 1.03        | 684.3299557 | 2         | -0.00034  | -0.256  | 10   | 20   |
| IP100221089 | 40S ribosomal protein S13                                                                   | GLSQSALPYR                      | 75.44    | 1.16        | 586.2801456 | 2         | 0.00114   | 0.973   | 10   | 19   |
| IP100221089 | 40S ribosomal protein S13                                                                   | LTSDDVKEQYK                     | 130.59   | 2.027       | 506.9085384 | 3         | 0.000439  | 0.289   | 28   | 39   |
| IP100393034 | protein regulator of cytokinesis 1 isoform 2                                                | KLNTTMTSANNSSIRPFGTGVHSPV543.77 | 3.89     | 2.212       | 847.6687007 | 4         | -0.000799 | -0.236  | 487  | 517  |
| IP100393034 | protein regulator of cytokinesis 1 isoform 2                                                | QTEEMLYGASPR                    | 36.63    | 1.628       | 521.5571895 | 3         | -0.000408 | -0.261  | 457  | 469  |
| IP100065515 | Isoform 1 of CWF19-like protein 2                                                           | ELNPLYWK                        | 1000     | 1.615       | 515.226318  | 2         | 0.0000845 | 0.0821  | 197  | 203  |
| IP100065515 | Isoform 1 of CWF19-like protein 2                                                           | TGDYVTLDDMFVSK                  | 67.96    | 2.969       | 925.3677975 | 2         | 0.00314   | 1.7     | 629  | 643  |
| IP100178861 | Isoform 2 of N(2),N(2)-dimethylguanosine tRNA methyltransferase                             | GDQCCYSHSPPTPR                  | 41.11    | 3.293       | 581.2203975 | 3         | -0.00101  | -0.583  | 588  | 601  |
| IP100982620 | cDNA FL161765, highly similar to 4-trimethylaminobutyraldehyde dehydrogenaseVITIEYSQLK      | 30.97                           | 1.837    | 662.3156125 | 2           | -0.000427 | -0.322    | 402     | 411  |      |
| IP100910417 | Ribosomal protein L15                                                                       | QGVIVR                          | 124.16   | 2.28        | 489.7263486 | 2         | -0.000154 | -0.158  | 57   | 63   |
| IP100973127 | cDNA FL178763                                                                               | KSLAQDSSQSGSPALYR               | 109.69   | 2.519       | 661.3182369 | 3         | 0.000434  | 0.219   | 104  | 121  |
| IP100015195 | Cleavage stimulation factor subunit 3                                                       | GAUVPVHDIYR                     | 1000     | 2.803       | 468.2344661 | 3         | -0.000778 | -0.555  | 698  | 709  |
| IP100015195 | Cleavage stimulation factor subunit 3                                                       | RPNEDSDEDEKGAUVPVHDIYR          | 1,000.00 | 3.277       | 732.3128657 | 4         | -0.000207 | -0.707  | 686  | 709  |
| IP100639961 | Uncharacterized protein                                                                     | THYPAQGEYQTHQPVYHK              | 95.68    | 3.509       | 598.7683711 | 4         | -0.00132  | -0.551  | 173  | 191  |
| IP100174976 | Isoform 1 of MAGUK p55 subfamily member 5                                                   | DQEVAGRDYHFFYK                  | 60.19    | 3.017       | 586.9249874 | 3         | -0.000413 | -0.463  | 520  | 533  |
| IP100945578 | 12 kDa protein                                                                              | VDYFIASK                        | 160.79   | 2.42        | 511.7333676 | 2         | -0.00112  | -1.09   | 44   | 51   |
| IP100923468 | SMARCA4 protein                                                                             | EDVYSDSLETK                     | 30.97    | 2.455       | 683.27655   | 2         | -0.00115  | -0.843  | 1407 | 1417 |
| IP100923468 | SMARCA4 protein                                                                             | GLQSYAVAHAVHTK                  | 24.95    | 3.457       | 582.2737423 | 3         | -0.00035  | -0.2    | 791  | 805  |
| IP100013297 | 28 kDa heat- and acid-stable phosphoprotein                                                 | QTSPEIDIAQLQAEK                 | 55.92    | 3.337       | 965.4285275 | 2         | 0.000703  | 0.365   | 16   | 31   |
| IP100013297 | 28 kDa heat- and acid-stable phosphoprotein                                                 | ARQYTSPEIDIAQLQAEK              | 19.53    | 4.261       | 719.6672359 | 3         | -0.000669 | -0.31   | 14   | 31   |
| IP100419791 | Isoform 1 of Arginine/serine-rich coiled-coil protein 2                                     | NLDAQEMAR                       | 1000     | 2.27        | 645.7637326 | 2         | 0.000614  | 0.476   | 402  | 411  |
| IP100419791 | Isoform 1 of Arginine/serine-rich coiled-coil protein 2                                     | SEDEAGSSVDEEYK                  | 26.2     | 2.644       | 936.330383  | 2         | -0.000151 | -0.0806 | 376  | 391  |
| IP100908380 | cDNA FLJ54110, highly similar to Homo sapiens nucleolar and spindle associated EMESIDQYIERK | 114.24                          | 2.247    | 540.9042965 | 3           | -0.000987 | -0.609    | 172     | 183  |      |
| IP100908380 | cDNA FLJ54110, highly similar to Homo sapiens nucleolar and spindle associated EMESIDQYIERK | 105.44                          | 2.159    | 746.8052365 | 2           | -0.000579 | -0.388    | 172     | 182  |      |
| IP100436634 | Isoform 3 of Nipped-B-like protein                                                          | HGSSDEYLMHVMR                   | 70.05    | 2.893       | 412.6738277 | 4         | -0.00209  | -1.27   | 241  | 253  |
| IP100719070 | Isoform 3 of Zinc finger CCHC-type with G patch domain-containing protein                   | ITVDVNGYTYK                     | 30.97    | 3.069       | 734.3242184 | 2         | -0.000415 | -0.283  | 238  | 249  |
| IP100304817 | SAM and SH3 domain-containing protein 1                                                     | NQLGNVPTLPMK                    | 27.96    | 2.076       | 784.8818967 | 2         | 0.000942  | 0.6     | 761  | 773  |
| IP100973358 | Uncharacterized protein                                                                     | KTEVISTEENR                     | 60.18    | 1.529       | 734.3300168 | 2         | 0.000598  | 0.0559  | 123  | 133  |
| IP100973358 | Uncharacterized protein                                                                     | EGDGVYNELETR                    | 30.97    | 2.327       | 812.8291012 | 2         | -0.00295  | -1.82   | 307  | 319  |
| IP100640833 | acidic leucine-rich nuclear phosphoprotein 32 family member E isoform 3                     | cPNLTYNLNSGNK                   | 61.94    | 3.244       | 787.3577878 | 2         | -0.000941 | -0.598  | 39   | 51   |
| IP100980953 | Uncharacterized protein                                                                     | IKNPFSADENVPLAK                 | 116.16   | 3.236       | 659.2846675 | 3         | 0.000961  | 0.486   | 956  | 971  |
| IP100164154 | Isoform 1 of Putative methyltransferase NSUN5                                               | TcSDDVVDYR                      | 288.3    | 4.039       | 528.8845976 | 3         | 0.000151  | 0.0953  | 145  | 156  |
| IP100006196 | Isoform 2 of Nuclear mitotic apparatus protein 1                                            | KLDVEEFDSSANSSFYSTR             | 27.96    | 4.077       | 708.9758297 | 3         | -0.000888 | -0.418  | 1808 | 1825 |
| IP100797067 | U2 snRNP-specific A' protein                                                                | LVLYIKVPQVR                     | 145.62   | 2.274       | 486.6018978 | 3         | -0.00218  | -1.5    | 133  | 143  |
| IP100550243 | THUMP domain-containing protein 1                                                           | AQYVLAK                         | 1000     | 2.054       | 436.7178036 | 2         | -0.000544 | -0.624  | 20   | 26   |
| IP100880118 | Metastasis associated 1 family, member 3, isoform CRA_a                                     | RPVVAINYAAIR                    | 1000     | 2.07        | 490.9255062 | 3         | -0.00136  | -0.923  | 438  | 449  |
| IP101011073 | cDNA FLJ55446, highly similar to Superkiller viral integrase 2-like 2                       | SFYQFHYR                        | 117.31   | 1.827       | 452.5239864 | 3         | -0.00102  | -0.751  | 487  | 495  |
| IP100845282 | Isoform 2 of Heterogeneous nuclear ribonucleoprotein D-like                                 | DLTEYLSR                        | 46.21    | 1.755       | 538.7371213 | 2         | -0.000209 | -0.194  | 44   | 51   |
| IP100556447 | Isoform 1 of Protein FAM113B                                                                | VAYMNPIMAR                      | 1000     | 1.986       | 658.7989499 | 2         | 0.000448  | 0.34    | 8    | 18   |
| IP100878135 | Putative uncharacterized protein DKFZp43G0310                                               | VVQNDAYTAPALPSSIR               | 49.9     | 2.745       | 941.4581906 | 2         | -0.00267  | -1.42   | 230  | 246  |
| IP100943550 | Isoform 3 of Perilipin-3                                                                    | LEPQIASASAYAHR                  | 59.15    | 3.503       | 551.2544551 | 3         | -0.000411 | -0.249  | 85   | 98   |
| IP101013317 | 40S ribosomal protein S27a                                                                  | cCLTYCFNPKPEDK                  | 86.89    | 2.989       | 605.5703121 | 3         | -0.000236 | -0.13   | 119  | 131  |
| IP100297455 | A-kinase anchor protein 8-like                                                              | QTADFLQEVYTNK                   | 54.16    | 2.525       | 818.8679196 | 2         | 0.00189   | 1.15    | 427  | 439  |
| IP100293884 | Isoform 2 of Kinesin-like protein KIF23                                                     | KGSQTNLKDVPVGVYR                | 233.72   | 2.454       | 634.6365963 | 3         | -0.000553 | -0.291  | 16   | 31   |
| IP100219839 | Isoform 2 of Hypermethylated in cancer 2 protein                                            | VHSGEKPYEQQLCGGK                | 57.12    | 2.186       | 643.6062008 | 3         | -0.000905 | -0.469  | 564  | 579  |
| IP100012535 | DnaJ homolog subfamily A member 1                                                           | QISQAYEVLSDAK                   | 70.88    | 3.452       | 766.3558346 | 2         | -0.000782 | -0.511  | 47   | 59   |
| IP100012535 | DnaJ homolog subfamily A member 1                                                           | HYNGEAYEEDHPR                   | 105.12   | 1.839       | 487.9368281 | 4         | -0.00139  | -0.713  | 375  | 389  |
| IP100301058 | Vasodilator-stimulated phosphoprotein                                                       | VQVHNPTANSFR                    | 84.28    | 2.194       | 542.9194332 | 2         | -0.000277 | -0.17   | 36   | 48   |
| IP100022334 | Omitthine aminotransferase, mitochondrial                                                   | YGANHVHPLVALER                  | 13.5     | 2.526       | 606.2893673 | 3         | -0.00117  | -0.647  | 50   | 64   |
| IP100449049 | Poly [ADP-ribose] polymerase 1                                                              | NRELGRFRPEYASQQLK               | 0        | 2.6         | 702.0006099 | 3         | -0.000347 | -0.165  | 166  | 182  |
| IP100449049 | Poly [ADP-ribose] polymerase 1                                                              | SDAYCYTGDVYATWK                 | 55.92    | 2.847       | 909.3589474 | 2         | 0.000578  | 0.318   | 306  | 320  |
| IP100449049 | Poly [ADP-ribose] polymerase 1                                                              | KFYPLEIDYQDDEAVK                | 102.33   | 2.084       | 708.6571651 | 3         | -0.00228  | -1.07   | 637  | 653  |
| IP100449049 | Poly [ADP-ribose] polymerase 1                                                              | KFYPLEIDYQDDEAVK                | 276.73   | 4.033       | 751.3557125 | 3         | -0.00164  | -0.728  | 637  | 654  |
| IP100397676 | 30 kDa protein                                                                              | ALLYKR                          | 1000     | 0.9869      | 422.2282712 | 2         | -0.000709 | -0.841  | 68   | 73   |
| IP100397676 | 30 kDa protein                                                                              | TNYNDYDEIR                      | 51.21    | 2.188       | 513.5477291 | 3         | -0.000189 | -0.123  | 224  | 234  |
| IP100002220 | histone deacetylase complex subunit SAP130 isoform A                                        | IQDYPAEAR                       | 1000     | 1.616       | 584.755737  | 2         | -0.000478 | -0.409  | 445  | 453  |
| IP100643722 | Isoform 1 of AT-rich interactive domain-containing protein 1A                               | NMDTYNANR                       | 60.18    | 2.854       | 671.250488  | 2         | -0.000276 | -0.205  | 1502 | 1511 |
| IP100643722 | Isoform 1 of AT-rich interactive domain-containing protein 1A                               | QSTGSAPQPPVGHVNR                | 99.17    | 2.17        | 602.9357296 | 3         | -0.000988 | -0.547  |      |      |

|              |                                                                                            |                         |                    |       |             |   |            |         |      |      |
|--------------|--------------------------------------------------------------------------------------------|-------------------------|--------------------|-------|-------------|---|------------|---------|------|------|
| IP100295457  | Isoform 2 of Myosin phosphatase Rho-interacting protein                                    | VRVESGYFLEK             | 75.44              | 2.868 | 498.5729366 | 3 | -0.000967  | -0.647  | 261  | 272  |
| IP100965993  | cDNA FLJ95176, Homo sapiens CGI-48 protein (CGI-48), mRNA                                  | IQSIVLER                | 81.61              | 2.163 | 551.2707516 | 2 | -0.000948  | -0.861  | 264  | 271  |
| IP100018411  | Zinc finger protein 629                                                                    | THTGEKPYELEGK           | 97.98              | 2.485 | 630.2583614 | 3 | -0.00192   | -1.02   | 339  | 353  |
| IP100917832  | Uncharacterized protein                                                                    | EGEYIK                  | 1000               | 1.199 | 409.6704709 | 2 | -0.00071   | -0.867  | 18   | 23   |
| IP100953043  | DNA topoisomerase 2                                                                        | HVDYVADQIVTK            | 196.8              | 2.165 | 734.347778  | 2 | -0.000896  | -0.61   | 325  | 336  |
| IP1009576832 | Uncharacterized protein                                                                    | yyWRPK                  | 27.96              | 1.322 | 496.7233884 | 2 | -0.000575  | -0.579  | 71   | 76   |
| IP1009576832 | Uncharacterized protein                                                                    | yyWRPK                  | 1,000.00, 1,000.00 | 1.961 | 536.7066037 | 2 | -0.000476  | -0.444  | 71   | 76   |
| IP1009579136 | Ribonucleoside-diphosphate reductase                                                       | IIDINYPVPEACLNSKR       | 48.15              | 2.593 | 749.0297237 | 3 | 0.000529   | 0.236   | 450  | 467  |
| IP100013415  | 40S ribosomal protein S7                                                                   | AQQNNVHKVETFSYVK        | 57.6               | 2.058 | 720.0056758 | 3 | 0.00435    | 2.02    | 161  | 178  |
| IP100903300  | Isoform 1 of REST corepressor 3                                                            | NFFVNIYR                | 1000               | 1.666 | 520.2241208 | 2 | 0.00029    | 0.279   | 326  | 332  |
| IP100027988  | Transcriptional repressor CTCF                                                             | THSGEKPEYCYGHR          | 32.23              | 2.035 | 522.7171016 | 4 | -0.00203   | -0.97   | 400  | 415  |
| IP100003843  | Isoform A1 of Tight junction protein ZO-2                                                  | IEIAQKHPDIYVPIK         | 1000               | 2.06  | 639.0067745 | 3 | -0.00505   | -2.64   | 1108 | 1123 |
| IP100946673  | cDNA FLJ57866, highly similar to Homo sapiens TAF8 RNA polymerase II, TATA ITPYTRPVSQYQVLR | ITPTYTRPVSQYQVLR        | 34.46              | 3.428 | 635.304565  | 3 | 0.00342    | 1.27    | 99   | 113  |
| IP100876873  | Uncharacterized protein                                                                    | TETNIVYK                | 90.37              | 2.017 | 541.2339474 | 2 | -0.000657  | -0.607  | 91   | 98   |
| IP100921284  | Isoform 3 of Histone-lysine N-methyltransferase EZH1                                       | QPCYLAVR                | 1000               | 2.454 | 623.7593381 | 2 | -0.000606  | -0.486  | 531  | 539  |
| IP100807514  | Isoform 2 of Forkhead box protein K1                                                       | HYPYIR                  | 23.98              | 1.404 | 489.6974179 | 2 | -0.000416  | -0.425  | 175  | 180  |
| IP100021381  | Isoform 1 of Securin-2                                                                     | SSVPSADDAYPEEK          | 105.44             | 2.048 | 844.359924  | 2 | 0.0015     | 0.887   | 102  | 116  |
| IP100011069  | Isoform 2 of Uridyl-DNA glycosylase                                                        | TLYSFFSPSPAR            | 60.18              | 2.123 | 726.8327023 | 2 | 0.00115    | 0.794   | 6    | 17   |
| IP100829838  | Transcription elongation factor A (SII)-like 4 variant 1                                   | NLQDPFYR                | 1000               | 1.41  | 615.2718503 | 2 | 0.000149   | 0.121   | 156  | 164  |
| IP100917015  | Uncharacterized protein                                                                    | VAHEDPMDIR              | 1000               | 2.939 | 513.5624996 | 3 | 0.000222   | 0.144   | 101  | 112  |
| IP100334894  | Isoform 3 of Protein polybromo-1                                                           | AHQPDYGFGLSR            | 68.84              | 2.868 | 529.558044  | 3 | -0.00564   | -3.56   | 1367 | 1379 |
| IP100334894  | Isoform 3 of Protein polybromo-1                                                           | HYNEEGSQVYNDHAHLEK      | 149.76             | 3.684 | 742.6553341 | 3 | -0.000174  | -0.0784 | 567  | 584  |
| IP100966516  | Uncharacterized protein                                                                    | ACQSIYRLHDVYR           | 66.42              | 2.368 | 595.6116329 | 3 | -0.000343  | -0.192  | 81   | 94   |
| IP100736943  | Isoform 5 of Homeobox protein cut-like 1                                                   | TSTVINWFHYR             | 226.57             | 3.17  | 539.9128414 | 3 | 0.00145    | 0.895   | 1183 | 1194 |
| IP100736943  | Isoform 5 of Homeobox protein cut-like 1                                                   | SQLQGPSSSEYWK           | 27.96              | 1.979 | 788.839172  | 2 | 0.00199    | 1.26    | 766  | 778  |
| IP100983590  | origin recognition complex subunit 3 isoform 3                                             | TDLVHLQK                | 119.87             | 2.528 | 549.2549435 | 2 | -0.00136   | -1.24   | 381  | 388  |
| IP100328688  | Isoform 1 of Sex comb on midleg-like protein 2                                             | SSSLNSGNYLNPACR         | 88.93              | 2.282 | 860.3627316 | 2 | 0.00155    | 0.899   | 546  | 560  |
| IP100297121  | UPF0549 protein C20orf43                                                                   | SIADSESEAYKSLFTTHSSAK   | 30.66              | 3.044 | 617.778564  | 4 | 0.00375    | 1.52    | 268  | 289  |
| IP100917641  | Uncharacterized protein                                                                    | INEELESQYQSQMSDK        | 24.95              | 3.14  | 670.278442  | 2 | -0.00155   | -0.772  | 32   | 47   |
| IP100877103  | Uncharacterized protein                                                                    | MLQHDYR                 | 1000               | 2.078 | 578.2548825 | 2 | -0.000387  | -0.335  | 9    | 16   |
| IP100965191  | Uncharacterized protein                                                                    | GVEDDYVSKK              | 41.47              | 1.862 | 466.8539425 | 2 | -0.000649  | -0.464  | 222  | 232  |
| IP100965191  | Uncharacterized protein                                                                    | KGYEDDYVSKK             | 53.49              | 1.771 | 509.5521846 | 3 | -0.000923  | -0.604  | 221  | 232  |
| IP101014546  | protein arginine N-methyltransferase 1 isoform 1                                           | TGFSTSPESPVTHWK         | 23.2               | 3.139 | 602.25769   | 3 | -0.00101   | -0.558  | 299  | 313  |
| IP100647857  | PRP18 pre-mRNA processing factor 18 homolog                                                | KEEEAYFR                | 1000               | 2.615 | 640.7635495 | 2 | -0.000753  | -0.588  | 21   | 29   |
| IP100012149  | U3 small nucleolar ribonucleoprotein protein MPP10                                         | EKPKEADYEK              | 53.49              | 2.442 | 493.8849483 | 3 | -0.00183   | -1.24   | 445  | 455  |
| IP100003377  | Isoform 1 of Serine/arginine-rich splicing factor 7                                        | VVGNLGTGAK              | 175.49             | 2.277 | 608.2919919 | 2 | -0.00147   | -1.21   | 13   | 24   |
| IP100003377  | Isoform 1 of Serine/arginine-rich splicing factor 7                                        | cYEGEKGHAYDCHR          | 69.51              | 3.475 | 546.9489131 | 4 | -0.000645  | -0.295  | 106  | 121  |
| IP100004068  | Isoform 3 of Mediator of RNA polymerase II transcription subunit 12                        | TEDEYMGSPR              | 97.72              | 1.784 | 581.71582   | 2 | -0.000412  | -0.354  | 1799 | 1808 |
| IP100000846  | Isoform 1 of Chromodomain-helicase-DNA-binding protein 4                                   | VAQYVVR                 | 1000               | 1.998 | 457.7285763 | 2 | -0.000699  | -0.764  | 1282 | 1288 |
| IP100000846  | Isoform 1 of Chromodomain-helicase-DNA-binding protein 4                                   | VAQYVREEMGEEVEER        | 1000               | 3.547 | 797.3465572 | 3 | 0.00117    | 0.709   | 1282 | 1300 |
| IP100103554  | Transcriptional repressor p66-beta                                                         | TTSSAYMLNLAHQVQTVNR     | 57.6               | 2.312 | 781.0393673 | 3 | 0.00123    | 0.523   | 311  | 331  |
| IP101010852  | cDNA FLJ57121, highly similar to Heterogeneous nuclear ribonucleoprotein F                 | FMSVQRQPYDRPGTAR        | 48.85              | 1.983 | 672.3155513 | 3 | -0.00142   | -0.706  | 124  | 144  |
| IP101010852  | cDNA FLJ57121, highly similar to Heterogeneous nuclear ribonucleoprotein F                 | DLSYLSGMYDHR            | 67.73              | 2.89  | 566.2204455 | 3 | 0.000295   | 0.174   | 186  | 198  |
| IP100294603  | Similar to Zinc finger MYM-type protein 5                                                  | FccQScVSEYK             | 60.18              | 1.373 | 774.2716061 | 2 | -0.00164   | -1.06   | 495  | 505  |
| IP100607775  | 76 kDa protein                                                                             | NyFQSTK                 | 132.18             | 1.833 | 532.7266843 | 2 | 0.000117   | 0.11    | 375  | 382  |
| IP100004233  | Isoform Long of Antigen KI-67                                                              | NiyAFMGTVPQK            | 168.16             | 2.61  | 724.8363034 | 2 | -0.000245  | -0.169  | 1550 | 1561 |
| IP101015406  | Protein                                                                                    | AQEADYEWLQK             | 1000               | 3.012 | 787.8430173 | 2 | 0.000083   | 0.0527  | 140  | 151  |
| IP100981739  | Uncharacterized protein                                                                    | RLAAAYLDLQR             | 1000               | 2.892 | 476.5733028 | 3 | -0.000668  | -0.468  | 46   | 56   |
| IP100332499  | Isoform 3 of Nuclear autoantigenic sperm protein                                           | EQYVAMGEKEAK            | 1000               | 2.711 | 569.5709224 | 3 | -0.00151   | -0.884  | 147  | 160  |
| IP100332499  | Isoform 3 of Nuclear autoantigenic sperm protein                                           | EAQLYAAQHLK             | 1000               | 3     | 474.8980044 | 3 | 0.00144    | 0.102   | 538  | 549  |
| IP100024067  | Isoform 1 of Clathrin heavy chain 1                                                        | ENPYDGR                 | 30.97              | 1.386 | 562.2084958 | 2 | -0.00056   | -0.498  | 896  | 903  |
| IP100013439  | Transcription factor Jun-B                                                                 | APGGLSLHDYK             | 103.45             | 1.898 | 413.1923519 | 3 | -0.000621  | -0.502  | 23   | 33   |
| IP100013439  | Transcription factor Jun-B                                                                 | LLKPSLAVNLADPYR         | 208.15             | 2.258 | 583.9821773 | 3 | 0.000255   | 0.146   | 34   | 48   |
| IP100916663  | Uncharacterized protein                                                                    | GDYDFPSSLQK             | 105.44             | 1.937 | 794.8880002 | 2 | 0.00145    | 0.912   | 148  | 160  |
| IP100916663  | Uncharacterized protein                                                                    | KGDYDFPSSLQK            | 75.44              | 2.59  | 858.9353635 | 3 | 0.00118    | 0.685   | 147  | 160  |
| IP100027705  | Isoform 1 of DNA primase large subunit                                                     | IILSNPSPQDYHGFPR        | 69.63              | 2.784 | 713.3225093 | 3 | -0.00141   | -0.661  | 370  | 387  |
| IP100956971  | cDNA FLJ151637, highly similar to Metastasis-associated protein MTA2                       | GHLSRPEAQSLSPYTSANR     | 27.96              | 4.008 | 751.3533931 | 3 | -0.0016    | -0.709  | 251  | 270  |
| IP100306446  | Isoform 1 of Zinc finger protein 24                                                        | IHTGEKPEYCYGHR          | 93.15              | 1.679 | 629.2708126 | 3 | -0.00127   | -0.673  | 328  | 342  |
| IP100306446  | Isoform 1 of Zinc finger protein 24                                                        | SYSQSNLFR               | 0                  | 2.209 | 634.7701413 | 2 | 0.00133    | 1.05    | 343  | 352  |
| IP100017339  | Splicing factor 3B subunit 4                                                               | NQDATVYVGLDEK           | 54.16              | 2.34  | 794.8483273 | 2 | -0.000997  | -0.628  | 10   | 23   |
| IP100642862  | Peptidyl-prolyl cis-trans isomerase-like 4                                                 | YQTDLYER                | 70.88              | 1.266 | 584.2409054 | 2 | 0.00156    | 1.34    | 461  | 468  |
| IP100642862  | Peptidyl-prolyl cis-trans isomerase-like 4                                                 | YNYvLHINWQR             | 35.48              | 1.553 | 574.9203487 | 2 | -0.000896  | -0.52   | 36   | 47   |
| IP100642862  | Peptidyl-prolyl cis-trans isomerase-like 4                                                 | SKYQTDLYER              | 0                  | 1.473 | 461.5382381 | 3 | -0.000362  | -0.262  | 459  | 468  |
| IP100642862  | Peptidyl-prolyl cis-trans isomerase-like 4                                                 | QDTKYDLLDEQAEDSK        | 0                  | 3.654 | 697.6441646 | 3 | -0.000883  | -0.327  | 359  | 375  |
| IP100642862  | Peptidyl-prolyl cis-trans isomerase-like 4                                                 | NTNQDLYR                | 130.85             | 1.626 | 552.2299802 | 2 | -0.000191  | -0.173  | 403  | 413  |
| IP100014474  | A-kinase anchor protein 8                                                                  | QFQYEEPDTK              | 100.67             | 2.384 | 739.316589  | 2 | -0.0000735 | -0.0497 | 307  | 317  |
| IP100014474  | A-kinase anchor protein 8                                                                  | KQFQYEEPDTK             | 97.98              | 2.084 | 535.9116207 | 3 | -0.00121   | -0.756  | 306  | 317  |
| IP100554560  | Protein C16orf88                                                                           | VEAFEPYIPISDDPK         | 70.16              | 1.528 | 826.8768307 | 2 | -0.00049   | -0.297  | 250  | 263  |
| IP101014585  | cDNA FLJ110676 fis, clone MT2RP2006464, highly similar to WD repeat and HMG-QASAASVYFQK    | QASAASVYFQK             | 30.97              | 2.993 | 590.755798  | 2 | -0.000155  | -0.132  | 490  | 499  |
| IP100306280  | Density-regulated protein                                                                  | LDAQYPLR                | 1000               | 1.993 | 521.7339474 | 2 | -0.00116   | -1.11   | 23   | 30   |
| IP100745955  | Probable rRNA-processing protein EBP2                                                      | RPTDYFAEMK              | 27.96              | 1.646 | 704.8024899 | 2 | -0.000172  | -0.122  | 132  | 142  |
| IP100013788  | HIV Tat-specific factor 1                                                                  | FQLKGEYDASK             | 43.77              | 1.759 | 455.8746944 | 3 | -0.000893  | -0.654  | 218  | 228  |
| IP100013788  | HIV Tat-specific factor 1                                                                  | DPEADYcIQLDGR           | 137.37             | 2.476 | 931.3695676 | 2 | -0.000582  | -0.312  | 321  | 335  |
| IP100219622  | Proteasome subunit alpha type-2                                                            | SILYDGR                 | 88.93              | 1.529 | 488.2128598 | 2 | -0.00103   | -1.06   | 54   | 60   |
| IP100032056  | Isoform 2 of Uncharacterized protein C17orf85                                              | GLYADTR                 | 96.21              | 1.343 | 438.1866452 | 2 | -0.00106   | -1.21   | 252  | 258  |
| IP100032056  | Isoform 2 of Uncharacterized protein C17orf85                                              | ALIGDDVGLTSYK           | 30.97              | 2.217 | 716.3428952 | 2 | 0.000439   | 0.307   | 37   | 49   |
| IP100175136  | Putative RNA-binding protein 15B                                                           | ALDYVGLYDOR             | 61.94              | 2.62  | 722.2959292 | 2 | -0.000166  | -0.115  | 303  | 313  |
| IP100175136  | Putative RNA-binding protein 15B                                                           | ERALDYVGLYDOR           | 74.96              | 2.378 | 576.9135738 | 2 | -0.00216   | -1.25   | 301  | 313  |
| IP100001150  | Zinc finger protein 217, isoform CRA_b                                                     | NDSPWAPPGRDYVcNR        | 126.67             | 2.221 | 677.9446407 | 3 | 0.00088    | 0.433   | 888  | 903  |
| IP100001150  | Zinc finger protein 217, isoform CRA_b                                                     | VEAEYLSRLDK             | 60.18              | 1.822 | 672.3102414 | 2 | -0.00107   | -0.795  | 100  | 110  |
| IP100294739  | Isoform 1 of SAM domain and HD domain-containing protein 1                                 | NGIDVDKWDYFAR           | 1000               | 2.546 | 560.2474361 | 3 | -0.000168  | -0.1    | 306  | 318  |
| IP100294739  | Isoform 1 of SAM domain and HD domain-containing protein 1                                 | ADDYIEITGAGGKK          | 118.24             | 1.835 | 506.5679927 | 2 | -0.000898  | -0.592  | 393  | 406  |
| IP100002966  | Heat shock 70 kDa protein 4                                                                | NAVEEYVEMRDK            | 98.4               | 2.966 | 575.9114376 | 3 | -0.00064   | -0.501  | 619  | 631  |
| IP100022597  | NEDD8-conjugating enzyme Ubc12                                                             | GGYIGSTYFER             | 30.97              | 2.167 | 665.2797848 | 2 | 0.0000181  | 0.0136  | 170  | 180  |
| IP100170596  | Paired amphipathic helix protein Sin3a                                                     | RLLDQPEQSPVYAQQR        | 175.49             | 3.033 | 619.2839962 | 3 | 0.000221   | 1.19    | 4    | 18   |
| IP100171044  | Schlafen family member 11                                                                  | AKQHYIFPWGGH            | 1000               | 3.35  | 545.2613521 | 3 | 0.00018    | 0.11    | 889  | 901  |
| IP1004040727 | Isoform 1 of Bromodomain-containing protein 4                                              | SDPYSTGHLR              | 42.13              | 2.541 | 404.8394771 | 3 | -0.00235   | -1.93   | 1051 | 1060 |
| IP100025176  | Survival of motor neuron-related-splicing factor 30                                        | VGVGTGIAQKPMTOQDTSKYVNR | 72.94              | 4.759 | 717.8321528 | 4 |            |         |      |      |

|             |                                                                                                          |                         |              |       |             |   |            |         |      |      |
|-------------|----------------------------------------------------------------------------------------------------------|-------------------------|--------------|-------|-------------|---|------------|---------|------|------|
| IP100784414 | isoform 1 of Signal transducer and activator of transcription 3                                          | YRPESQHPHADGSAAPYLK     | 72.29        | 1.848 | 861.3734737 | 3 | 0.00228    | 0.883   | 686  | 707  |
| IP100010700 | isoform 1 of Protein PRRC2A                                                                              | SEGSEYEIPK              | 27.96        | 1.374 | 674.2717282 | 2 | -0.000195  | -0.145  | 1089 | 1099 |
| IP100010700 | isoform 1 of Protein PRRC2A                                                                              | SEGSEYEIPKR             | 59.15        | 2.822 | 501.8832393 | 3 | -0.00286   | -1.9    | 1089 | 1100 |
| IP100030274 | Coiled-coil domain-containing protein 55                                                                 | DLSGFYR                 | 112.12       | 1.655 | 469.1948849 | 2 | -0.000182  | -0.194  | 179  | 185  |
| IP100978741 | protein LLP homolog                                                                                      | TLLDQHQYPIWMQR          | 42.29        | 1.898 | 693.9877315 | 3 | -0.000282  | -0.136  | 83   | 98   |
| IP100005055 | UPFD428 protein Ckorf56                                                                                  | FNTDEETMYLR             | 60.18        | 2.962 | 894.337402  | 2 | 0.00109    | 0.608   | 68   | 80   |
| IP100952907 | Uncharacterized protein                                                                                  | STDWSSQYSMWAGVR         | 27.96        | 3.057 | 891.8606564 | 2 | -0.00234   | -1.31   | 10   | 25   |
| IP100023409 | isoform 1 of Regulator of nonsense transcripts 3B                                                        | VTIDDDPEYR              | 202.51       | 1.962 | 680.2722214 | 2 | -0.000609  | -0.448  | 151  | 161  |
| IP100202036 | isoform 2 of Exosome component 10                                                                        | REDESQYGLNPHMLK         | 23.2         | 4.278 | 721.320251  | 2 | -0.000223  | -0.103  | 523  | 539  |
| IP101011355 | cDNA FLJ53931, highly similar to Bifunctional 3'-phosphoadenosine5'-phosphosutNVVYQAHVSR                 |                         | 141.12       | 2.988 | 526.5798336 | 3 | 0.00142    | 0.903   | 19   | 31   |
| IP100784612 | Ubiquitin carboxyl-terminal hydrolase                                                                    | YALVAAR                 | 112.12       | 1.514 | 454.2074277 | 2 | -0.000796  | -0.877  | 1066 | 1072 |
| IP100844323 | isoform 5 of Protein PRRC2B                                                                              | KLHGWAQPDYQK            | 1000         | 3.041 | 526.2487178 | 3 | -0.00112   | -0.712  | 457  | 469  |
| IP100167941 | Midasin                                                                                                  | AQESGLYR                | 50.19        | 1.817 | 566.7377316 | 2 | 0.0000117  | 0.0103  | 3546 | 3554 |
| IP100218624 | isoform 1 of Protein SON                                                                                 | KKEADSVYGEWVPEK         | 83.7         | 2.782 | 648.6433101 | 3 | -0.00145   | -0.744  | 2225 | 2240 |
| IP100218624 | isoform 1 of Protein SON                                                                                 | SMSSSYSAADR             | 30.97        | 1.879 | 643.2333981 | 2 | -0.000355  | -0.276  | 1131 | 1141 |
| IP100434625 | isoform 3 of Methyl-CpG-binding domain protein 2                                                         | SDVYFSPGSK              | 33.44        | 1.591 | 486.5503536 | 2 | -0.0000158 | -0.0109 | 175  | 186  |
| IP100434625 | isoform 3 of Methyl-CpG-binding domain protein 2                                                         | SDVYFSPGSK              | 61.94        | 3.205 | 665.2737424 | 2 | -0.000767  | -0.577  | 175  | 185  |
| IP100980041 | cDNA FLJ55302, highly similar to Transcription factor COE2                                               | AADIAEALVSPR            | 27.96        | 2.211 | 728.3488766 | 2 | 0.0014     | 0.963   | 247  | 259  |
| IP100004838 | isoform Crk-II of Adapter molecule crk                                                                   | QEEAEVYR                | 1000         | 2.009 | 552.2238766 | 2 | -0.0011    | -0.995  | 131  | 138  |
| IP100607784 | isoform 3 of Zinc finger protein 638                                                                     | RLTPSMNDYQYAASR         | 27.96        | 3.842 | 683.9696651 | 3 | 0.000519   | 0.253   | 406  | 422  |
| IP101009942 | DNA-repair protein complementing XP-G cells variant (Fragment)                                           | RVVSEDTSHYLLK           | 117.49       | 2.911 | 580.62915   | 3 | -0.00163   | -0.935  | 705  | 718  |
| IP100647008 | isoform 2 of Bromodomain-containing protein 7                                                            | HLVEEYVKPK              | 69.51        | 1.962 | 543.2645259 | 3 | 0.000501   | 0.308   | 13   | 24   |
| IP100984022 | cDNA FLJ2740 fs, clone BRAWH2016655, highly similar to Ubiquitin-like 1-activGVTEcyEchPKPQTR             |                         | 49.77        | 1.908 | 647.9377437 | 3 | -0.00148   | -0.76   | 58   | 72   |
| IP100746351 | isoform 1 of Exosome complex exonuclease RRP44                                                           | SAPVYKR                 | 104.74       | 1.613 | 450.7207028 | 2 | -0.000846  | -0.939  | 102  | 108  |
| IP100289800 | isoform Short of Glucose-6-phosphate 1-dehydrogenase                                                     | VQPNEAVYTK              | 23.98        | 2.376 | 614.7843625 | 2 | -0.000627  | -0.51   | 394  | 403  |
| IP100645201 | 40S ribosomal protein S8                                                                                 | QWYSEYALPLGR            | 19           | 2.77  | 567.2597652 | 3 | 0.000219   | 0.129   | 91   | 103  |
| IP101013471 | cDNA FLJ55916, highly similar to General transcription factor II-1                                       | APSVLEISSMR             | 67.96        | 3.078 | 667.2969616 | 2 | -0.000768  | -0.576  | 912  | 922  |
| IP100789281 | isoform 3 of Protein virilizer homolog                                                                   | SEYIEPAKR               | 43.29        | 1.081 | 586.7711789 | 2 | -0.000794  | -0.677  | 1606 | 1614 |
| IP100979357 | 16 kDa protein                                                                                           | YNHPKNLLYQK             | 239.62       | 3.116 | 532.2640377 | 2 | -0.00196   | -1.23   | 97   | 108  |
| IP100030781 | isoform Alpha of Signal transducer and activator of transcription 1-alpha/beta                           | FHDLSLQDQQYR            | 21.95        | 3.462 | 606.2692867 | 3 | 0.00128    | 0.706   | 57   | 70   |
| IP100021248 | Serine/threonine-protein kinase PLK1                                                                     | TLCGTPMVAPEVLSK         | 70.88        | 2.481 | 921.9401852 | 2 | 0.000105   | 0.572   | 210  | 225  |
| IP100012578 | Importin subunit alpha-4                                                                                 | IEQLQNHENEYDK           | 1000         | 2.803 | 618.2755123 | 3 | -0.00114   | -0.615  | 462  | 475  |
| IP100025786 | isoform 2 of B-cell CLL/lymphoma 7 protein family member A                                               | IYKWPVTEPK              | 106.06       | 2.718 | 480.5832515 | 2 | -0.00022   | -0.0153 | 45   | 55   |
| IP100290094 | Splicing factor, suppressor of white-apricot homolog                                                     | GLHLDSEYAEVSTWNR        | 27.96        | 3.306 | 758.3153072 | 3 | 0.000145   | 0.0638  | 78   | 95   |
| IP100290094 | Splicing factor, suppressor of white-apricot homolog                                                     | HSLPSAVR                | 0            | 2.413 | 505.727142  | 2 | 0.000432   | 0.428   | 790  | 797  |
| IP100744062 | isoform 2 of Transcription elongation regulator 1                                                        | TYNNR                   | 27.96        | 1.467 | 537.2081906 | 2 | -0.00067   | -0.624  | 424  | 430  |
| IP100916802 | Uncharacterized protein                                                                                  | DDYFAKK                 | 1000         | 1.617 | 483.7023007 | 2 | -0.00075   | -0.776  | 186  | 192  |
| IP100029778 | isoform 1 of Tumor suppressor p53-binding protein 1                                                      | WSSNGVYFSGK             | 60.18        | 1.881 | 688.2720944 | 2 | 0.000437   | 0.318   | 1495 | 1505 |
| IP100106698 | Protein pelota homolog                                                                                   | MGAYHTIELEPNR           | 59.15        | 2.76  | 537.5792366 | 3 | -0.000767  | -0.476  | 96   | 108  |
| IP100175146 | isoform 2 of Zinc finger C3H1 domain-containing protein                                                  | SFLESNFTKPNLK           | 41.47        | 2.124 | 589.9501339 | 3 | -0.00118   | -0.665  | 1046 | 1059 |
| IP100175146 | isoform 2 of Zinc finger C3H1 domain-containing protein                                                  | LQKLEYEYALK             | 20.2         | 1.35  | 493.2499691 | 3 | -0.000269  | -0.182  | 969  | 979  |
| IP100477468 | RNA polymerase-associated protein CTR9 homolog                                                           | QSDLLSQYQHVAVR          | 84.28        | 3.021 | 619.276855  | 3 | -0.00138   | -0.742  | 816  | 830  |
| IP100016725 | General transcription factor 3C polypeptide 4                                                            | LYETSRY                 | 111.84       | 2.19  | 506.2129819 | 2 | -0.000688  | -0.68   | 216  | 222  |
| IP100152407 | hypothetical protein LOC147339 isoform b                                                                 | HGGSGTQVSTR             | 70.16        | 2.353 | 424.8507381 | 3 | -0.000862  | -0.678  | 298  | 308  |
| IP100411886 | Nucleolar complex protein 2 homolog                                                                      | LKDRDPEYK               | 1000         | 2.596 | 464.2187801 | 3 | -0.000336  | -0.242  | 76   | 85   |
| IP100099311 | isoform 1 of tRNA (adenine-N(1))-methyltransferase non-catalytic subunit TRMIVQVPLDR                     |                         | 1000         | 1.74  | 542.7451779 | 2 | -0.000396  | -0.365  | 432  | 439  |
| IP100384443 | Sarcoma antigen NY-SAR-29 (Fragment)                                                                     | SSYEDYADKPLEPLK         | 53.24        | 2.164 | 654.9747921 | 3 | -0.0017    | -0.866  | 58   | 73   |
| IP100301517 | isoform 1 of Uncharacterized protein Ckorf57                                                             | HQDDPEVNSQYFQTSTNLSLSNK | 41.47        | 4.418 | 945.0817257 | 3 | -0.0024    | -0.847  | 601  | 624  |
| IP100301517 | isoform 1 of Uncharacterized protein Ckorf57                                                             | FLGLDHLHYSR             | 21.95        | 3.598 | 479.8946224 | 3 | 0.0000956  | 0.063   | 690  | 700  |
| IP100329594 | Thyroid transcription factor 1-associated protein 26                                                     | AQEYEQIAQK              | 1000         | 1.988 | 708.8058469 | 2 | -0.00106   | -0.747  | 172  | 182  |
| IP100410618 | Uncharacterized protein KIAA1143                                                                         | NQVSYRPAEPAFLAR         | 42.13        | 3.351 | 633.3158565 | 3 | -0.000607  | -0.32   | 5    | 20   |
| IP100023344 | isoform 1 of Symplesin                                                                                   | TYLGMSTR                | 30.97        | 1.875 | 561.2567136 | 2 | -0.00112   | -1      | 692  | 700  |
| IP100027834 | Heterogeneous nuclear ribonucleoprotein L                                                                | YGGGSEGGK               | 0            | 2.465 | 541.7009885 | 2 | -0.000375  | -0.346  | 47   | 56   |
| IP100027798 | Protein FAM103A1                                                                                         | SWGNNVQPHR              | 100.82       | 1.969 | 669.7723996 | 2 | -0.00105   | -0.786  | 86   | 95   |
| IP100221325 | E3 SUMO-protein ligase RanBP2                                                                            | IGANHYISPMCK            | 53.49        | 1.991 | 510.2158199 | 2 | -0.00128   | -0.839  | 1242 | 1253 |
| IP100013214 | cDNA FLJ55999, highly similar to DNA replication licensing factor MCM3                                   | ELISDNQYR               | 117.47       | 2.146 | 609.2639157 | 2 | -0.00042   | -0.345  | 83   | 91   |
| IP100217686 | Putative rRNA methyltransferase 3                                                                        | DKFYHLAK                | 1000         | 2.118 | 551.2612302 | 2 | 0.00111    | 1.01    | 13   | 20   |
| IP100854630 | Uncharacterized protein                                                                                  | SGYTYLHSLHHYK           | 48.15        | 2.578 | 616.9420162 | 3 | -0.000628  | -0.34   | 1073 | 1086 |
| IP100449923 | isoform 1 of Retinoic acid-induced protein 1                                                             | HHAQETLHQLNLA           | 117.08       | 2.301 | 590.6088253 | 3 | -0.0017    | -0.961  | 297  | 310  |
| IP100940864 | isoform 1 of PHD finger protein 10                                                                       | RAYFQLQTHVQYPOQK        | 57.12        | 2.61  | 694.0176998 | 3 | -0.000877  | -0.422  | 223  | 239  |
| IP100177938 | isoform 2 of Transducin-like enhancer protein 3                                                          | HRGSADYSMEAK            | 44.63        | 2.524 | 477.8624263 | 3 | -0.0012    | -0.837  | 214  | 225  |
| IP100879750 | 19 kDa protein                                                                                           | VAQLEQYVIR              | 1000         | 1.848 | 649.8295895 | 2 | 0.000328   | 0.252   | 55   | 64   |
| IP100398725 | isoform 1 of Zinc finger protein 644                                                                     | ANSHLYR                 | 27.96        | 1.577 | 552.2371213 | 2 | -0.00101   | -0.914  | 734  | 741  |
| IP100514619 | Czorf4 protein                                                                                           | YSYDESQGEIYR            | 51.44        | 1.642 | 876.8432004 | 2 | -0.000851  | -0.485  | 202  | 214  |
| IP100981654 | protein FRG1B-like                                                                                       | QEIINVK                 | 1000         | 1.802 | 567.2390744 | 2 | 0.0000319  | 0.0282  | 62   | 69   |
| IP100760588 | isoform 5 of Double-stranded RNA-specific adenosine deaminase                                            | FQCYAVGAQTFFSPVADPSKR   | 71.39        | 2.18  | 784.7082515 | 3 | -0.000887  | -0.377  | 351  | 371  |
| IP100910634 | cDNA FLJ161403, highly similar to Nuclear ubiquitin casen and cyclin-dependentKVVDYQSFQESDAPDEDYGR       |                         | 24.95, 57.12 | 2.454 | 842.6511837 | 3 | -0.00106   | -0.418  | 9    | 28   |
| IP100909907 | cDNA FLJ52850, moderately similar to Cold-inducible RNA-binding protein                                  | DYSSR                   | 58.42        | 1.527 | 435.6553647 | 2 | -0.000522  | -0.6    | 106  | 111  |
| IP100909907 | cDNA FLJ52850, moderately similar to Cold-inducible RNA-binding protein                                  | SGGYGSSRDYSSR           | 17.98        | 3.286 | 531.2109371 | 3 | -0.000665  | -0.418  | 98   | 111  |
| IP100015808 | Nucleolar GTP-binding protein 2                                                                          | IKPLQYQSTVASGTAVR       | 63.52        | 1.775 | 671.3576046 | 3 | -0.00116   | -0.578  | 56   | 73   |
| IP100985306 | Uncharacterized protein                                                                                  | GYPKPDGEPSEYQTPLNK      | 59.15        | 2.951 | 738.3439937 | 3 | -0.000795  | -0.359  | 128  | 146  |
| IP100020194 | isoform Short of TATA-binding protein-associated factor 2N                                               | NFGGRDYGPR              | 1000         | 1.959 | 452.5262752 | 3 | -0.00155   | -1.14   | 208  | 218  |
| IP100013810 | isoform 1 of Uncharacterized methyltransferase WBSCR22                                                   | EVRPDTQYTKR             | 50.64        | 2.096 | 510.5754696 | 3 | -0.000768  | -0.502  | 265  | 276  |
| IP100013810 | isoform 1 of Uncharacterized methyltransferase WBSCR22                                                   | EVRPDTQYTKR             | 24.95        | 1.81  | 467.8769832 | 2 | -0.00123   | -0.875  | 265  | 275  |
| IP100647851 | isoform 2 of Pre-mRNA-splicing factor 3B8                                                                | TYHEVVDIEYFK            | 201.63       | 3.064 | 541.5764766 | 3 | -0.000647  | -0.399  | 81   | 92   |
| IP100218189 | Zinc finger protein 14 homolog                                                                           | LHTGEKYEEK              | 53.4         | 1.656 | 481.2110897 | 3 | -0.00127   | -0.883  | 221  | 231  |
| IP100290184 | RNA (guanine-N(7))-methyltransferase                                                                     | VSDYVQDR                | 72.58        | 2.07  | 531.2188718 | 2 | -0.000608  | -0.573  | 112  | 119  |
| IP100554438 | isoform 4 of SURP and G-patch domain-containing protein 2                                                | SRAEMVDHSDGGR           | 65.09        | 2.009 | 573.2265621 | 3 | -0.00019   | -0.111  | 49   | 62   |
| IP100014757 | NKAP-like protein                                                                                        | ENQYSADEKR              | 54.16        | 2.615 | 478.208984  | 3 | 0.000075   | 0.192   | 357  | 367  |
| IP100745019 | isoform B of SWI/SNF-related matrix-associated actin-dependent regulator of chromatin assembly complex 2 | DMNDNQGSGYVGR           | 223.75       | 2.573 | 640.2828365 | 3 | 0.000333   | 0.173   | 84   | 99   |
| IP100216492 | isoform 2 of Heterogeneous nuclear ribonucleoprotein H3                                                  | DGMNDNQGSGYVGR          | 27.96        | 2.301 | 746.7809445 | 2 | 0.00104    | 0.695   | 273  | 286  |
| IP100871360 | isoform 1 of Zinc finger CCHC domain-containing protein 7                                                | RGHLLYSAPALCEYVVPK      | 130.59       | 2.846 | 833.0469356 | 3 | 0.00173    | 0.695   | 271  | 290  |
| IP100871360 | isoform 1 of Zinc finger CCHC domain-containing protein 7                                                | GHLLYSPAPLCEYVVPK       | 163.56       | 2.51  | 781.012878  | 3 | 0.000662   | 0.283   | 272  | 290  |
| IP100020021 | Protein DEK                                                                                              | VYENPTYDLTR             | 86.89        | 1.817 | 871.86853   | 2 | -0.00229   | -1.31   | 350  | 362  |
| IP100719590 | TCF3 protein                                                                                             | GTSQYPPSYGSSSR          | 27.96        | 2.393 | 810.3223263 | 2 | -0.000999  | -0.617  | 94   | 107  |
| IP100647405 | isoform 2 of Centromere protein 1                                                                        | GlyDPELEK               | 1000         | 2.011 | 685.337341  | 2 | 0.00093    | 0.679   | 660  | 670  |
| IP100297859 | isoform 1 of Histone-lysine N-methyltransferase MLL2                                                     | VKEPEQYFR               | 1000         | 1.113 | 458.215057  | 2 | -0.000806  | -0.587  | 1577 | 1586 |
| IP100900293 | filamin-B isoform 1                                                                                      |                         |              |       |             |   |            |         |      |      |

|             |                                                                                                  |                          |            |        |             |   |            |          |      |      |
|-------------|--------------------------------------------------------------------------------------------------|--------------------------|------------|--------|-------------|---|------------|----------|------|------|
| IP10007089  | Ribosome biogenesis protein NSA2 homolog                                                         | KNPSSPLYTLGVTK           | 27.96      | 2.72   | 600.3169551 | 3 | -0.000611  | -0.34    | 201  | 216  |
| IP101012260 | cDNA FLJ33908 fs, clone CTONG2008S18, highly similar to DEAD/H (Asp-Glu-AluGGGGGGYQK             |                          | 1000       | 2.587  | 504.2029721 | 2 | -0.000907  | -0.901   | 375  | 384  |
| IP100303832 | RNA polymerase-associated protein RTF1 homolog                                                   | NISAI5YINQR              | 30.97      | 2.33   | 679.8275143 | 2 | 0.000277   | 0.204    | 556  | 566  |
| IP100219866 | Isoform 2 of Zinc finger Ran-binding domain-containing protein 2                                 | TGYGGFNER                | 86.89      | 2.417  | 569.2216794 | 2 | -0.00119   | -1.05    | 100  | 109  |
| IP100975548 | Uncharacterized protein                                                                          | VISYGGDYADLPEYFKR        | 45.98      | 3.469  | 710.9863277 | 3 | 0.000607   | 0.285    | 300  | 316  |
| IP100418234 | Isoform A of Methyl-CpG-binding protein 2                                                        | TQPAVATAATAAEKVK         | 65.42      | 1.859  | 567.6143795 | 3 | 0.00136    | 0.801    | 436  | 451  |
| IP100026219 | Cleavage and polyadenylation specificity factor subunit 1                                        | CTAHYVAHVHVESK           | 81.07      | 3.203  | 548.9011837 | 3 | -0.000191  | -0.116   | 1020 | 1032 |
| IP100302008 | Isoform 3 of Zinc finger protein 407                                                             | HGQDYHFLCK               | 1000       | 2.324  | 462.1880184 | 3 | -0.00269   | -1.94    | 728  | 737  |
| IP100893933 | Uncharacterized protein                                                                          | LDSSAQFYFYR              | 30.97      | 1.89   | 767.3253171 | 2 | 0.00128    | 0.836    | 524  | 524  |
| IP100873498 | Isoform 2 of Glioma tumor suppressor candidate region gene 1 protein                             | NRPPKIYEAR               | 23.2       | 2.411  | 475.5734249 | 3 | -0.000602  | -0.423   | 1051 | 1061 |
| IP100549730 | Probable methylthioribulose-1-phosphate dehydratase                                              | HGDVEIVAFSGVQK           | 202.38     | 2.562  | 531.9155269 | 3 | -0.000696  | -0.437   | 52   | 65   |
| IP100646783 | TRMT1-like protein isoform 2                                                                     | DGMVVEENPYR              | 1000       | 2.207  | 702.2683713 | 2 | -0.00141   | -1       | 343  | 353  |
| IP100978044 | Uncharacterized protein                                                                          | ETVGSQDLREKDYLAFTVTR     | 51.21      | 2.787  | 786.7168575 | 3 | 0.000396   | 0.168    | 3011 | 3030 |
| IP100295485 | Heat shock 70 kDa protein 4L                                                                     | NAVEEYVDFDRR             | 70.16      | 2.642  | 585.917358  | 3 | -0.0015    | -0.856   | 622  | 634  |
| IP100005511 | PHD finger-like domain-containing protein 5A                                                     | TDLFYER                  | 171.35     | 2.177  | 512.2128293 | 2 | -0.00109   | -1.07    | 96   | 102  |
| IP100921860 | cDNA FLJ161649, highly similar to Homo sapiens estrogen receptor binding protein17SAAPTSQSK      |                          | 67.96      | 2.073  | 673.8035886 | 2 | -0.0000744 | -0.0553  | 426  | 437  |
| IP100871744 | Uncharacterized protein                                                                          | NEVDGEYR                 | 1000       | 1.827  | 531.208053  | 2 | -0.000341  | -0.321   | 462  | 469  |
| IP100794091 | Uncharacterized protein                                                                          | NLYIISVK                 | 93.05      | 1.566  | 515.2732541 | 2 | 0.0000566  | 0.055    | 36   | 43   |
| IP101013046 | 50 kDa protein                                                                                   | CHVSTHQHQAAPPSTR         | 54.72      | 3.024  | 511.4719539 | 4 | -0.00125   | -0.613   | 314  | 330  |
| IP100013216 | Origin recognition complex subunit 2                                                             | DKTSLDVLEEYEAHSSSK       | 116.16     | 3.145  | 717.9755855 | 3 | -0.00132   | -0.613   | 234  | 251  |
| IP100153032 | Protein LTV1 homolog                                                                             | LQVELNDYIK               | 0          | 1.805  | 682.8107297 | 2 | -0.000392  | -0.287   | 294  | 303  |
| IP100153032 | Protein LTV1 homolog                                                                             | LQVELNDYIK               | 20.98      | 2.031  | 541.2547603 | 3 | -0.003     | -1.85    | 294  | 305  |
| IP100376904 | Isoform 4 of NSFL1 cofactor p47                                                                  | LGAAPPEEESAIVAGEKR       | 47.48      | 3.498  | 619.6191402 | 3 | -0.00146   | -0.784   | 46   | 62   |
| IP100165237 | Isoform 2 of WD repeat-containing protein 74                                                     | LVTCTGYHQVYR             | 53.49      | 2.73   | 471.8829952 | 3 | -0.00176   | -1.24    | 198  | 208  |
| IP100982737 | Conserved hypothetical protein                                                                   | GKEDDKIVR                | 1000       | 2.564  | 401.8517757 | 3 | -0.00165   | -1.37    | 146  | 154  |
| IP100564611 | Isoform 2 of HEAT repeat-containing protein 2                                                    | SYQSSVQYLVR              | 48.15      | 1.982  | 818.8562009 | 2 | -0.00015   | -0.0915  | 739  | 750  |
| IP100549516 | Target of EGFR1 protein 1                                                                        | FVASLEYAFKR              | 84.93      | 2.08   | 525.25415   | 3 | 0.00127    | 0.809    | 281  | 292  |
| IP100008961 | Telomeric repeat-binding factor 2-interacting protein 1                                          | ADGYPWISR                | 122.33     | 2.231  | 572.7451169 | 2 | -0.000518  | -0.452   | 356  | 364  |
| IP100968130 | CDKN2A-interacting protein                                                                       | VTDAPYVTRDELVAK          | 26.2       | 3.205  | 930.4433591 | 2 | -0.000533  | -0.287   | 109  | 124  |
| IP100968130 | CDKN2A-interacting protein                                                                       | VTDAPYVTR                | 27.96      | 1.913  | 602.7659299 | 2 | -0.00119   | -0.989   | 109  | 118  |
| IP100002831 | Histone deacetylase complex subunit SAP3DL                                                       | HLVLCDFHK                | 1000       | 2.3    | 438.1902462 | 3 | -0.0000339 | -0.00259 | 70   | 78   |
| IP100747403 | Isoform 1 of mRNA cap guanine-N7 methyltransferase                                               | NLEEGHSSTVAAHYHELQVGLKLR | 26.75      | 4.003  | 723.3399653 | 4 | -0.00094   | -0.325   | 140  | 164  |
| IP100026957 | WW domain-binding protein 4                                                                      | KFCdYcK                  | 1000       | 1.824  | 550.7010495 | 2 | -0.000483  | -0.439   | 11   | 17   |
| IP100023530 | Cyclin-dependent kinase 5                                                                        | IAGEGYGVTFK              | 23.2       | 1.711  | 626.2867428 | 2 | -0.000766  | -0.612   | 10   | 20   |
| IP100910958 | cDNA FLJ360847, highly similar to Homo sapiens denticleless homolog (DTL), mRfK1c1yFHR           |                          | 42.13      | 2.268  | 402.1829525 | 3 | -0.000684  | -0.568   | 387  | 394  |
| IP100306299 | E2F-associated phosphoprotein                                                                    | RGYHGLGQPR               | 1000       | 2.289  | 407.5277095 | 3 | -0.00165   | -1.35    | 156  | 165  |
| IP100100151 | Isoform 1 of 5'-3' exonuclease 2                                                                 | QAAYEMR                  | 1000       | 1.924  | 474.686279  | 2 | -0.000294  | -0.31    | 459  | 465  |
| IP100023177 | Isoform 1 of Chromatin assembly factor 1 subunit A                                               | LISENSVYEK               | 54.16      | 1.563  | 613.2898556 | 2 | 0.00016    | 0.127    | 801  | 810  |
| IP100017672 | cDNA FLJ25678 fs, clone TST04067, highly similar to PURINE NUCLEOSIDE PHO(VIM)DSELEK             |                          | 50.64      | 1.669  | 653.785339  | 2 | -0.00147   | -1.13    | 249  | 258  |
| IP100293845 | Isoform 1 of Telomere-associated protein RIF1                                                    | GASSPYGASGTPR            | 56.2       | 1.54   | 602.7682976 | 2 | 0.0000437  | 0.0337   | 359  | 411  |
| IP100032406 | DnaJ homolog subfamily A member 2                                                                | EISFAYEVLNPEKRR          | 35.84      | 2.868  | 621.2968746 | 3 | 0.00125    | 0.67     | 49   | 63   |
| IP100004290 | Digestive organ expansion factor homolog                                                         | DFGEHPFYDR               | 1000       | 1.862  | 497.8573909 | 3 | -0.0018    | -1.21    | 26   | 36   |
| IP101013438 | cDNA FLJ39071 fs, clone NT2RP7015789, highly similar to Zinc finger protein 26NHQENVLEK          |                          | 1000       | 1.883  | 467.8669429 | 3 | 0.00115    | 0.822    | 200  | 209  |
| IP100016387 | Pre-mRNA cleavage complex 2 protein Pcf11                                                        | ASGHYFDEK                | 61.87      | 1.723  | 567.2189938 | 2 | -0.000364  | -0.321   | 1185 | 1193 |
| IP100296594 | RING1 and YY1-binding protein                                                                    | INSQLVAQQAQYATPPPKK      | 24.95      | 3.399  | 829.4321285 | 3 | -0.000091  | -0.157   | 57   | 78   |
| IP100024255 | G patch domain and KOW motifs-containing protein                                                 | GGQYNTK                  | 30.97      | 2.109  | 505.702728  | 2 | -0.000896  | -0.886   | 373  | 380  |
| IP100004337 | Zinc finger and BTB domain-containing protein 11                                                 | SVNEGAYIR                | 206.74     | 1.837  | 544.7426144 | 2 | -0.000323  | -0.296   | 511  | 519  |
| IP100305545 | Isoform 1 of Lariat debranching enzyme                                                           | SLYHVR                   | 55.91      | 1.74   | 427.6997983 | 2 | -0.000755  | -0.884   | 149  | 154  |
| IP100106491 | mRNA turnover protein 4 homolog                                                                  | YTEMAYR                  | 122.33     | 1.684  | 564.7068478 | 2 | -0.00146   | -1.29    | 119  | 126  |
| IP100402209 | ADNP homeobox protein 2                                                                          | VQNYTVNLLGETK            | 61.94      | 2.232  | 778.8798215 | 2 | -0.000109  | -0.0697  | 134  | 146  |
| IP100182106 | Isoform 2 of Menin                                                                               | VSTPDSYTL5FLKR           | 27.96      | 2.867  | 565.2790523 | 3 | 0.00118    | 0.697    | 592  | 605  |
| IP100028955 | Ribosome biogenesis protein BOP1                                                                 | CLDLYLQPR                | 1000       | 2.055  | 645.2744137 | 2 | -0.00155   | -1.21    | 367  | 375  |
| IP100307760 | Zinc finger CCH domain-containing protein 8                                                      | FVYQGYCTR                | 19.53      | 1.913  | 637.2576291 | 2 | -0.000259  | -0.203   | 228  | 235  |
| IP100792734 | Isoform 2 of Zinc finger protein 773                                                             | LHTGKPYECSCEGK           | 18.45      | 2.156  | 625.5866085 | 3 | -0.00148   | -0.79    | 211  | 226  |
| IP100922730 | cDNA FLJ33647, highly similar to Four and a half LIM domains protein 1                           | GEDFYCTHETK              | 49.77      | 1.691  | 575.8811641 | 3 | -0.00131   | -0.762   | 140  | 152  |
| IP100942874 | Isoform 2 of G patch domain-containing protein 11                                                | ANFYELCDKQYQK            | 171.67     | 2.261  | 649.5981441 | 3 | -0.00117   | -1.63    | 56   | 69   |
| IP100879512 | 9 kDa protein                                                                                    | KTYVTPR                  | 24.95      | 1.514  | 472.7339474 | 2 | -0.000657  | -0.695   | 11   | 17   |
| IP100006892 | Zinc finger protein 280C                                                                         | GTNTSSPYDAGADYLR         | 125.88     | 2.49   | 884.3643185 | 2 | -0.00201   | -1.14    | 222  | 237  |
| IP100895911 | cellular nucleic acid-binding protein isoform 2                                                  | TSEVNLQYR                | 196        | 2.158  | 554.7100827 | 2 | -0.00105   | -0.949   | 154  | 161  |
| IP100942449 | Uncharacterized protein                                                                          | IIEEGYGVYVR              | 75.44      | 1.367  | 683.3084103 | 2 | -0.000231  | -0.169   | 429  | 439  |
| IP100645974 | Utrophin                                                                                         | LHYPMVEYCIPTSGEDVR       | 33.21      | 2.019  | 783.0092159 | 3 | -0.00219   | -0.935   | 68   | 86   |
| IP100645857 | CDC40 protein                                                                                    | TFATYGVLPDLSLNDYVSAK     | 54.52      | 3.657  | 793.3623653 | 3 | 0.000719   | 0.302    | 131  | 151  |
| IP100972999 | Histone deacetylase                                                                              | GKYAVNPFMR               | 23.2       | 2.149  | 475.8847957 | 3 | -0.000289  | -0.203   | 190  | 200  |
| IP100908873 | Isoform 3 of Nucleolar and coiled-body phosphoprotein 1                                          | NKPGPYSSVPPSPAPPK        | 20.19      | 4.44   | 507.0110164 | 4 | -0.000736  | -0.364   | 285  | 303  |
| IP100001556 | Isoform 1 of Splicing factor U2AF 65 kDa subunit                                                 | YCDPDSYR                 | 0          | 1.518  | 646.7236325 | 2 | -0.00135   | -1.05    | 463  | 471  |
| IP100807704 | Isoform 2 of TATA box-binding protein-associated factor RNA polymerase 1 subunitSEKPLYSFVKDPAVYK |                          | 48.15      | 2.813  | 705.3471065 | 3 | 0.000443   | 0.21     | 429  | 445  |
| IP100921892 | cDNA FLJ51227, highly similar to Homo sapiens KIN, antigenic determinant of reTDYWLQPEIWK        |                          | 24.95      | 2.412  | 792.891235  | 2 | 0.00292    | 1.84     | 171  | 182  |
| IP100029764 | Splicing factor 3A subunit 3                                                                     | WQPDTEEEEDSSGVVVNKK      | 18.95      | 2.509  | 812.0009952 | 3 | -0.000591  | -0.243   | 471  | 490  |
| IP100063248 | Zinc finger protein 62S                                                                          | AFSDLYPR                 | 152.42     | 2.249  | 598.2636716 | 2 | 0.000592   | 0.495    | 132  | 140  |
| IP100655989 | Isoform 2 of Protein lin-54 homolog                                                              | FHYVR                    | 1000       | 1.712  | 401.175842  | 2 | -0.000968  | -1.21    | 269  | 273  |
| IP100242452 | SWI/SNF complex subunit SMARCC1                                                                  | KGQASLYGK                | 72.58      | 2.976  | 516.2498166 | 2 | -0.00102   | -0.987   | 346  | 354  |
| IP100887233 | mediator of RNA polymerase II transcription subunit 27-like isoform 2                            | LQYHAGLASGLLNQSLK        | 76.65      | 1.834  | 674.3463741 | 3 | 0.00115    | 0.567    | 117  | 134  |
| IP100647132 | Isoform 4 of AT-rich interactive domain-containing protein 4B                                    | RPVLGyR                  | 1000       | 0.8269 | 470.7418515 | 2 | -0.00115   | -1.22    | 11   | 17   |
| IP101010518 | Uncharacterized protein                                                                          | EAEAFAYR                 | 27.96      | 2.374  | 600.2404782 | 2 | -0.0042    | -3.5     | 2466 | 2474 |
| IP100791157 | 16 kDa protein                                                                                   | VIIIEKYR                 | 0.00, 0.00 | 1.614  | 672.8040158 | 2 | -0.000451  | -0.336   | 15   | 23   |
| IP100375534 | Isoform 2 of Transcriptional adapter 3                                                           | IQYEFDDDPIDVPR           | 88.93      | 1.875  | 958.9205929 | 2 | 0.00113    | 0.592    | 130  | 144  |
| IP100013743 | Isoform 1 of BUD13 homolog                                                                       | DSERDELYAQWQK            | 83.67      | 1.776  | 559.5704952 | 3 | -0.000091  | -0.0543  | 487  | 499  |
| IP100006167 | Protein phosphatase 1G                                                                           | AyTGFSSNSER              | 58.42      | 2.134  | 649.7567746 | 2 | 0.000398   | 0.306    | 210  | 220  |
| IP100854561 | Isoform 2 of Ubiquitin-2                                                                         | VHQHSAVQQNYVSLQATISK     | 84.46      | 3.206  | 805.7323604 | 3 | -0.000795  | -0.329   | 929  | 949  |
| IP100974250 | Uncharacterized protein                                                                          | YAPSYHVPK                | 42.13      | 2.052  | 479.2091365 | 3 | -0.000367  | -0.256   | 948  | 958  |
| IP100436705 | Uncharacterized protein                                                                          | HLSEGTNSVATR             | 27.96      | 2.146  | 472.5368038 | 3 | -0.000865  | -0.611   | 513  | 524  |
| IP100941278 | tetratricopeptide repeat protein 14 isoform b                                                    | IGVDFYK                  | 1000       | 1.653  | 461.209808  | 2 | -0.000635  | -0.69    | 313  | 316  |
| IP100011306 | Coiled-coil domain-containing protein 130                                                        | VGNYYTPYR                | 26.2       | 1.76   | 713.8253171 | 2 | 0.00198    | 1.39     | 76   | 89   |
| IP100418555 | Zinc finger protein 813                                                                          | AFNYSSLR                 | 30.97      | 1.103  | 575.7691037 | 2 | 0.000656   | 0.57     | 223  | 231  |
| IP100880146 | Zinc finger protein 187 isoform a                                                                | IHTGKPYLCHGCK            | 60.63      | 2.309  | 473.9693294 | 4 | -0.00171   | -0.906   | 346  | 360  |
| IP100639924 | 97 kDa protein                                                                                   | GTQFDYER                 | 89.54      | 1.748  | 548.2112424 | 2 | -0.000267  | -0.244   | 579  | 586  |
| IP100069817 | Isoform 1 of Tyrosine-protein kinase BAZ1B                                                       | DHTVSGDEDEYPR            | 155.62     | 2.663  | 544.1999508 | 3 | -0.00049   | -0.3     | 943  | 955  |
| IP100219153 | 60S ribosomal protein L22                                                                        | VVANSKESYELR             | 0          | 1.735  | 492.2364193 | 3 | -0.000619  | -0.42    | 102  | 113  |
| IP100965305 | Uncharacterized protein                                                                          | EGNYVGSK                 | 60.34      |        |             |   |            |          |      |      |

|              |                                                                                             |                              |                    |        |             |   |           |         |      |      |
|--------------|---------------------------------------------------------------------------------------------|------------------------------|--------------------|--------|-------------|---|-----------|---------|------|------|
| IP100171537  | Isoform 2 of Zinc finger matrix-type protein 3                                              | VILATENDyck                  | 93.41              | 2.186  | 703.3072507 | 2 | -0.000916 | -0.651  | 140  | 150  |
| IP100306642  | DDb1- and CUL4-associated factor 13                                                         | SlYsQIQEQR                   | 26.2               | 2.934  | 666.3035886 | 2 | -0.000374 | -0.281  | 551  | 560  |
| IP100044725  | Isoform 1 of Histone H2A deubiquitinase MYSM1                                               | NILLEEYLSKK                  | 20.98              | 2.726  | 542.5896602 | 3 | -0.000596 | -0.367  | 68   | 79   |
| IP10018954   | U2 small nuclear ribonucleoprotein auxiliary factor 35 kDa subunit-related proteinHGHHDDySR |                              | 0                  | 2.06   | 454.1643673 | 3 | -0.000775 | -0.57   | 367  | 376  |
| IP100294682  | Isoform 1 of Mediator of RNA polymerase II transcription subunit 26                         | NEIIQSYLR                    | 0                  | 1.466  | 651.8087155 | 2 | 0.0000795 | 0.061   | 483  | 492  |
| IP100900336  | Ataxin-1-like                                                                               | VVGALASQdYR                  | 61.87              | 2.965  | 629.7954098 | 2 | -0.000332 | -0.264  | 340  | 350  |
| IP100068355  | Isoform 1 of Probable fibronin-1                                                            | LYGLEPAHLLySR                | 0                  | 2.407  | 70.2875362  | 3 | 0.000432  | 0.253   | 395  | 408  |
| IP100033153  | Nuclear RNA export factor 1                                                                 | YNPYTRPNR                    | 0                  | 1.239  | 681.3042599 | 2 | 0.000368  | 0.271   | 72   | 81   |
| IP100033153  | Nuclear RNA export factor 1                                                                 | YNPYTRPNR                    | 0                  | 1.631  | 506.5722957 | 3 | -0.000189 | -0.125  | 72   | 82   |
| IP100955798  | HCG1742968, isoform CRA_c                                                                   | MNGVMFPGNSyTER               | 0                  | 2.473  | 933.8801266 | 2 | -0.0032   | -1.71   | 21   | 36   |
| IP100979595  | Uncharacterized protein                                                                     | TySYLTPDLWK                  | 0                  | 2.655  | 733.8354489 | 2 | 0.00025   | 1.4     | 189  | 199  |
| IP100100426  | Isoform 1 of Forkhead box protein 13                                                        | SKDDPGKGSyWAIDTNPk           | 0                  | 3.939  | 686.9779659 | 3 | 0.000521  | 0.253   | 142  | 159  |
| IP100852831  | Uncharacterized protein                                                                     | THTGERPyCTEPGGCR             | 0                  | 2.904  | 707.615356  | 3 | -0.00174  | -0.82   | 349  | 365  |
| IP100219543  | Isoform Delta-2 of Serine/threonine-protein phosphatase 2A 56 kDa regulatory sIKySGGRQYK    |                              | 0                  | 1.963  | 423.891357  | 3 | -0.00261  | -2.05   | 72   | 82   |
| IP100968276  | Uncharacterized protein                                                                     | TyQELLVQNPIAQPLASR           | 0                  | 2.392  | 745.7112423 | 3 | 0.00045   | 0.201   | 23   | 41   |
| IP100220241  | Isoform 3 of Beta-actinin                                                                   | WLNTPNYTLR                   | 0                  | 1.651  | 679.3198239 | 2 | 0.0012    | 0.881   | 43   | 442  |
| IP100170770  | Isoform 1 of PHD finger protein 3                                                           | QRPySDSHLKR                  | 17.78              | 1.92   | 414.1963191 | 4 | -0.00333  | -2.01   | 1921 | 1932 |
| IP100878557  | 62 kDa protein                                                                              | IHTGDRPyVCPFDGKMKK           | 13.29              | 3.993  | 561.749145  | 4 | -0.000352 | -0.157  | 536  | 553  |
| IP100216230  | Lamina-associated polypeptide 2, isoform alpha                                              | ETTtGYKdVVENIcGR             | 17.99, 16.25       | 3.06   | 726.9653316 | 3 | -0.00188  | -0.862  | 316  | 332  |
| IP100955014  | cyclin-dependent kinase 1 isoform 1                                                         | IEKIGYyGVVVYK                | 24.95              | 2.643  | 545.9402462 | 3 | 0.00136   | 0.833   | 7    | 20   |
| IP100013174  | Isoform 1 of RNA-binding protein 14                                                         | AAQNHSGyQR                   | 1,000.00, 20.20    | 1.89   | 415.5009761 | 3 | -0.00106  | -0.854  | 658  | 667  |
| IP100013174  | Isoform 1 of RNA-binding protein 14                                                         | AAQMHSyQR                    | 42.13              | 2.543  | 614.7506711 | 2 | 0.0000906 | 0.0737  | 658  | 667  |
| IP10010740   | Isoform Long of Splicing factor, proline- and glutamine-rich                                | GREEyEGPNKPR                 | 1000               | 3.388  | 410.6952205 | 4 | -0.00212  | -1.29   | 694  | 706  |
| IP100012074  | Isoform 1 of Heterogeneous nuclear ribonucleoprotein R                                      | KLKDYAFVHFEDR                | 1000               | 2.537  | 437.7109065 | 4 | -0.000876 | -0.501  | 372  | 384  |
| IP100939558  | cDNA FLJ38696 fs, clone KIDNE2001931, highly similar to HETEROGENEOUS NUDyGHSSRDyPSR        |                              | 95.84, 17.99       | 2.549  | 601.212524  | 3 | -0.000136 | -0.0755 | 232  | 245  |
| IP100939558  | cDNA FLJ38696 fs, clone KIDNE2001931, highly similar to HETEROGENEOUS NUDyAPPRDyYR          |                              | 155.18, 0.00       | 1.9    | 837.323425  | 2 | -0.00133  | -0.797  | 220  | 231  |
| IP100797148  | Isoform 2 of Heterogeneous nuclear ribonucleoprotein A1                                     | DyFEyGK                      | 98.4               | 1.448  | 565.2160641 | 2 | -0.000123 | -0.109  | 123  | 130  |
| IP100797148  | Isoform 2 of Heterogeneous nuclear ribonucleoprotein A1                                     | EDTEEHLDRdFEyGK              | 69.5               | 1.848  | 759.3156734 | 3 | 0.00144   | 0.634   | 114  | 130  |
| IP100301503  | Isoform 2 of Transformer-2 protein homolog beta                                             | RRDyDR                       | 1,000.00, 1,000.00 | 2.207  | 401.8165584 | 3 | -0.000933 | -0.775  | 218  | 224  |
| IP100301503  | Isoform 1 of Transformer-2 protein homolog beta                                             | RPHTFPGyMGRPTyGSSR           | 21.90, 1,000.00    | 2.791  | 582.5249629 | 4 | 0.000535  | 0.23    | 198  | 217  |
| IP100215884  | Isoform ASF-1 of Serine/arginine-rich splicing factor 1                                     | DIEDVfYK                     | 1000               | 1.585  | 545.7344968 | 2 | 0.000642  | 0.579   | 31   | 38   |
| IP100456887  | Heterogeneous nuclear ribonucleoprotein U-like protein 2                                    | YRGDyDRfYR                   | 98.63              | 1.909  | 516.5524288 | 3 | -0.00169  | -1.09   | 694  | 704  |
| IP100456887  | Heterogeneous nuclear ribonucleoprotein U-like protein 2                                    | DWQSYyYHPQDR                 | 23.20, 36.63       | 2.139  | 652.2369381 | 3 | 0.0000611 | 0.00313 | 721  | 733  |
| IP100220717  | Isoform 3 of Putative RNA-binding protein 15                                                | GGsREyDTGGSSSSSR             | 40.26              | 3.074  | 547.2166133 | 3 | -0.000837 | -0.51   | 107  | 122  |
| IP100017297  | Matrin-3                                                                                    | EPYRyVR                      | 1000               | 1.274  | 547.2639767 | 2 | 0.000502  | 0.459   | 168  | 175  |
| IP1000413671 | Isoform 2 of Bcl-2-associated transcription factor 1                                        | RPKEEEDWPEyTPK               | 24.95              | 3.493  | 628.6123043 | 3 | -0.000664 | -0.352  | 827  | 840  |
| IP1000413671 | Isoform 2 of Bcl-2-associated transcription factor 1                                        | ESDGFREEKnyK                 | 160.69             | 2.335  | 527.8912349 | 3 | -0.000672 | -0.425  | 447  | 458  |
| IP1000413671 | Isoform 2 of Bcl-2-associated transcription factor 1                                        | THHEMKYySGFAGVSRPR           | 21.44              | 3.005  | 542.9979854 | 4 | -0.00166  | -0.765  | 777  | 794  |
| IP100013891  | Isoform Long of Transformer-2 protein homolog alpha                                         | RRDSyDR                      | 43.29              | 2.814  | 404.1717525 | 3 | -0.00102  | -0.842  | 233  | 240  |
| IP100012340  | Serine/arginine-rich splicing factor 9                                                      | IyVGNLPTDyR                  | 174.23             | 2.383  | 663.8266598 | 2 | -0.000532 | -0.401  | 16   | 26   |
| IP100032830  | Isoform 1 of Oligoribonuclease, mitochondrial (Fragment)                                    | WYPEEyFAPK                   | 47.18              | 1.615  | 556.2452999 | 3 | 0.000723  | 0.434   | 179  | 190  |
| IP100910458  | Heterogeneous nuclear ribonucleoprotein K                                                   | RdYGDHsPR                    | 1,000.00, 1,000.00 | 0.9872 | 657.7155759 | 2 | 0.000469  | 0.357   | 254  | 262  |
| IP100031812  | Nuclease-sensitive element-binding protein 1                                                | YAADRHyR                     | 104.78             | 1.99   | 415.8437496 | 3 | -0.000928 | -0.745  | 138  | 146  |
| IP100418313  | interleukin enhancer-binding factor 3 isoform d                                             | NADHSmNyQR                   | 1,000.00, 28.54    | 1.68   | 498.8541866 | 3 | -0.000332 | -0.222  | 888  | 898  |
| IP100418313  | interleukin enhancer-binding factor 3 isoform d                                             | GYNHGQGSySYNSySPGGGSDyN24.95 | 4.374              | 3.78   | 1111.762451 | 3 | 0.00468   | 1.4     | 780  | 810  |
| IP100218435  | Isoform 2 of U4/U6 small nuclear ribonucleoprotein Prp4                                     | KPHyYGSLEE                   | 172.69, 107.30     | 5.103  | 541.9002071 | 3 | -0.00129  | -0.792  | 26   | 37   |
| IP100015924  | Isoform 1 of Tuffelin-interacting protein 11                                                | AVSSNVGyMGPGAR               | 156.18             | 1.755  | 794.3531491 | 2 | -0.000553 | -0.349  | 714  | 728  |
| IP100013830  | SNW domain-containing protein 1                                                             | NLDKMyGDDLEAR                | 1000               | 2.129  | 578.907043  | 3 | 0.000553  | 0.319   | 453  | 466  |
| IP100013830  | SNW domain-containing protein 1                                                             | IkyDAIAR                     | 1000               | 1.578  | 515.2602536 | 2 | -0.000844 | -0.82   | 96   | 103  |
| IP100013830  | SNW domain-containing protein 1                                                             | DMAQSYyRPSK                  | 0                  | 1.412  | 688.3073727 | 2 | -0.00131  | -0.949  | 442  | 452  |
| IP100782992  | Isoform 1 of Serine/arginine repetitive matrix protein 2                                    | SSTPPESyYVGSLSLQK            | 0                  | 1.64   | 982.4577023 | 2 | 0.00205   | 1.05    | 1041 | 1058 |
| IP100014344  | Isoform Long of Dual specificity tyrosine-phosphorylation-regulated kinase 1A               | KYVNDyTDDNyDTYK              | 53.49              | 2.793  | 726.9683834 | 3 | -0.00163  | -0.746  | 134  | 150  |
| IP100959665  | Isoform 2 of Ubiquitin carboxyl-terminal hydrolase 10                                       | KKRPPGyYyLK                  | 0.00, 0.00         | 1.452  | 553.9287105 | 3 | 0.000223  | 0.135   | 201  | 212  |
| IP100476886  | General transcription factor IIF subunit 2                                                  | VVTTNyKPVANHyNYIEER          | 11.57              | 2.863  | 630.2996821 | 4 | -0.00147  | -0.585  | 148  | 167  |
| IP100396378  | Isoform B1 of Heterogeneous nuclear ribonucleoproteins A2/B1                                | DyFEyGK                      | 128.57             | 1.311  | 565.7081906 | 2 | 0.00013   | 0.115   | 130  | 137  |
| IP100056880  | Zinc finger protein 787                                                                     | IHTGEKPyTCDGCR               | 20.19              | 3.025  | 624.2587276 | 2 | -0.000815 | -0.815  | 143  | 157  |
| IP100005978  | Serine/arginine-rich splicing factor 2                                                      | RYGGGyGR                     | 84.78              | 1.841  | 511.7143246 | 2 | -0.000202 | -0.198  | 109  | 117  |
| IP100104050  | Thyroid hormone receptor-associated protein 3                                               | yLHDDREGESDk                 | 225.59, 211.36     | 2.262  | 615.22467   | 3 | 0.000402  | 0.218   | 880  | 893  |
| IP100104050  | Thyroid hormone receptor-associated protein 3                                               | AEGKyKDDVdLR                 | 1000               | 2.249  | 529.2470089 | 3 | -0.00125  | -0.788  | 706  | 718  |
| IP100007928  | Pre-mRNA-processing-splicing factor 8                                                       | ANPALyVLR                    | 1000               | 1.951  | 548.781738  | 2 | 0.000244  | 0.0222  | 1736 | 1744 |
| IP100395337  | Isoform 1 of Pre-mRNA 3'-end-processing factor F1P1                                         | YREyAERGyR                   | 54.48, 135.51      | 2.542  | 551.2156368 | 3 | 0.000602  | 0.365   | 507  | 517  |
| IP100395337  | Isoform 1 of Pre-mRNA 3'-end-processing factor F1P1                                         | YREyAER                      | 74.63              | 2.242  | 533.7216794 | 2 | -0.000293 | -0.275  | 507  | 513  |
| IP100395337  | Isoform 1 of Pre-mRNA 3'-end-processing factor F1P1                                         | yRYREyAER                    | 35.48, 77.91       | 1.928  | 489.1938778 | 3 | -0.000575 | -0.392  | 507  | 513  |
| IP100465294  | Cell division cycle 5-like protein                                                          | ARWYEWLdPSIK                 | 235.22             | 3.245  | 591.2910762 | 3 | 0.000152  | 0.0859  | 48   | 60   |
| IP100045914  | Mx2-interacting protein                                                                     | HYDQDyRDRP                   | 41.18, 39.19       | 1.52   | 563.2034298 | 3 | 0.000181  | 0.107   | 174  | 174  |
| IP100479209  | cDNA FLJ54590, highly similar to KH domain-containing, RNA-binding, signalranEHpYGR         |                              | 20.19              | 1.013  | 501.1982419 | 2 | 0.000432  | 0.432   | 417  | 423  |
| IP100337315  | Isoform 1 of E3 ubiquitin-protein ligase RBBP6                                              | ATyDTRKNPEETK                | 39.54              | 2.379  | 544.9144283 | 3 | 0.000408  | 0.25    | 1547 | 1559 |
| IP100337315  | Isoform 1 of E3 ubiquitin-protein ligase RBBP6                                              | REDyVGGQSHR                  | 226.99             | 2.932  | 461.8652034 | 3 | -0.000766 | -0.554  | 880  | 890  |
| IP100337315  | Isoform 1 of E3 ubiquitin-protein ligase RBBP6                                              | TyVLSR                       | 30.97              | 1.861  | 409.6942441 | 2 | -0.000653 | -0.811  | 86   | 91   |
| IP100410040  | Isoform 2 of Periplin-1                                                                     | YSHyDyRDyDEGR                | 0                  | 2.456  | 639.9199825 | 3 | -0.000229 | -0.119  | 59   | 72   |
| IP100410040  | Isoform 2 of Periplin-1                                                                     | SHPSDyGR                     | 50.19              | 1.361  | 556.7116086 | 2 | -0.000834 | -0.75   | 28   | 36   |
| IP100220740  | Isoform 2 of Nucleophosmin                                                                  | ADKDYHFK                     | 1000               | 1.746  | 552.231506  | 2 | -0.00124  | -1.12   | 25   | 32   |
| IP100007941  | Protein HEXIM1                                                                              | HWKPyK                       | 1,000.00, 1,000.00 | 2.131  | 591.230319  | 2 | -0.000419 | -0.355  | 163  | 169  |
| IP101010257  | Similar to YLP motif containing 1                                                           | SDRPyEGSPMFGGER              | 18.45              | 2.774  | 621.9300533 | 3 | 0.000683  | 0.367   | 1483 | 1498 |
| IP100017617  | Probable ATP-dependent RNA helicase DDX5                                                    | DRENyDR                      | 1000               | 1.574  | 524.198547  | 2 | -0.000457 | -0.437  | 510  | 516  |
| IP100010204  | Serine/arginine-rich splicing factor 3                                                      | VyVGNLGNNGMKTEER             | 163.34             | 2.313  | 652.978088  | 3 | 0.000487  | 0.249   | 12   | 28   |
| IP100925601  | Uncharacterized protein                                                                     | VVACNLyPFVK                  | 1000               | 1.866  | 695.3362424 | 2 | 0.000468  | 0.337   | 97   | 107  |
| IP100514505  | Isoform 4 of BCL-6 corepressor                                                              | JANSAGyVGR                   | 56.2               | 2.141  | 601.7639767 | 2 | -0.000598 | -0.497  | 966  | 976  |
| IP100514505  | Isoform 4 of BCL-6 corepressor                                                              | VHLTPQAAyDySEFHkHyAR         | 0                  | 2.708  | 637.8001094 | 4 | -0.000564 | -0.221  | 343  | 363  |
| IP100219875  | Isoform 2ABC of Catenin delta-1                                                             | HYEDyPGGSDNyGSLSR            | 43.97              | 2.962  | 685.2700191 | 3 | 0.00138   | 0.672   | 162  | 179  |
| IP100550191  | Uncharacterized protein C9orf78                                                             | ATDDyHyEKFK                  | 86.69, 99.22       | 1.804  | 568.8958126 | 3 | 0.00043   | 0.252   | 273  | 284  |
| IP100655641  | Isoform 2 of Transcription elongation factor SPT5                                           | ISQGPYKygVGVK                | 43.77              | 2.197  | 530.2769771 | 3 | 0.00105   | 0.664   | 708  | 721  |
| IP101011344  | 37 kDa protein                                                                              | DSyVGDyEAQSK                 | 26.2               | 1.684  | 639.7485959 | 2 | 0.00014   | 0.11    | 51   | 61   |
| IP101011344  | 37 kDa protein                                                                              | DSyVGDyEAQSKR                | 72.58              | 3.189  | 478.8682247 | 3 | -0.0013   | -0.908  | 51   | 62   |
| IP100923436  | Isoform 4 of Nuclear receptor corepressor 2                                                 | SyVEAQEDyLR                  | 242.17             | 2.736  | 356.907043  | 2 | -0.000447 | -0.278  | 1353 | 1364 |
| IP100005648  | Scaffold attachment factor B2                                                               | cyGFVNTSdEATK                | 171.35             | 2.199  | 888.8491208 | 2 | 0.00412   | 2.32    | 449  | 463  |
| IP101010914  | Rearranged L-myc fusion sequence variant (Fragment)                                         | KfYySK                       | 53.                |        |             |   |           |         |      |      |

|              |                                                                                                |                         |                    |        |             |   |            |         |      |      |
|--------------|------------------------------------------------------------------------------------------------|-------------------------|--------------------|--------|-------------|---|------------|---------|------|------|
| IP100464978  | Insulin receptor substrate 2 insertion mutant (Fragment)                                       | SDDYMPSPASVSPAK         | 48.43              | 1.769  | 881.8576047 | 2 | 0.000358   | 0.203   | 674  | 689  |
| IP100018203  | Isoform SRP55-2 of Serine/arginine-rich splicing factor 6                                      | DRDGYSGSR               | 0                  | 1.687  | 628.2411496 | 2 | -0.000524  | -0.0417 | 76   | 85   |
| IP100909544  | cDNA FLJ52848, highly similar to ATP-dependent RNA helicase DDX3X                              | SDYDGGSR                | 82.59              | 1.949  | 525.2005002 | 2 | -0.00105   | -1      | 146  | 154  |
| IP100260689  | Splicing factor 3B subunit 1                                                                   | IADREDEYK               | 1000               | 1.986  | 449.5378414 | 3 | -0.00165   | -1.23   | 112  | 121  |
| IP100412579  | 60S ribosomal protein L10a                                                                     | VSRDLYEAVR              | 70.16              | 2.342  | 463.5578914 | 3 | 0.000498   | 0.358   | 5    | 15   |
| IP100019996  | SAFB-like transcription modulator isoform b                                                    | FGHGSDYR                | 0                  | 1.864  | 553.2091061 | 2 | -0.000393  | -0.0355 | 737  | 745  |
| IP100910763  | Uncharacterized protein                                                                        | LDDYQER                 | 1000               | 1.929  | 509.6979977 | 2 | -0.000256  | -0.251  | 75   | 81   |
| IP100910763  | Uncharacterized protein                                                                        | GKLDYQER                | 1000               | 2.233  | 602.2559811 | 2 | -0.000789  | -0.656  | 73   | 81   |
| IP100004273  | Isoform 1 of RNA-binding protein 25                                                            | RFPVAPLPPLTK            | 21.95              | 1.799  | 602.3433223 | 3 | 0.00099    | 0.549   | 247  | 261  |
| IP100004273  | Isoform 1 of RNA-binding protein 25                                                            | KLVLPLDYGEDDKNATK       | 90.43              | 2.12   | 629.3035884 | 3 | -0.000111  | -0.059  | 711  | 726  |
| IP100292975  | RNA-binding protein 27                                                                         | DYDRYERVELR             | 48.63, 44.63       | 2.041  | 672.2630001 | 2 | -0.000408  | -0.202  | 145  | 157  |
| IP101014521  | cDNA FLJ35994, highly similar to Zinc finger protein 450                                       | HLLQHHIHTCEKPYK         | 60.63              | 4.261  | 508.5141292 | 4 | -0.000185  | -0.0911 | 169  | 184  |
| IP10889541   | Isoform 4 of Probable ATP-dependent RNA helicase DDX17                                         | RDSASyRDR               | 20.19              | 1.714  | 402.506805  | 3 | -0.00166   | -1.38   | 597  | 605  |
| IP100291939  | Structural maintenance of chromosomes protein 1A                                               | QEKEEADRyQR             | 1000               | 1.463  | 511.2230526 | 2 | -0.000819  | -0.535  | 201  | 211  |
| IP100291939  | Structural maintenance of chromosomes protein 1A                                               | IEKLEEYITTSK            | 43.97              | 2.077  | 511.9201046 | 3 | -0.000863  | -0.563  | 435  | 446  |
| IP100794894  | Protein                                                                                        | NKLDHyAIK               | 1000               | 0.8505 | 432.226934  | 3 | -0.000796  | -0.615  | 71   | 80   |
| IP100794894  | Protein                                                                                        | NKLDHyAIKPLTTESAMK      | 198.32             | 3.526  | 600.8070064 | 4 | 0.000424   | 0.177   | 71   | 90   |
| IP100170786  | WW domain-binding protein 11                                                                   | AQLSDYFQAVK             | 54.16              | 2.483  | 675.3109128 | 2 | -0.000236  | -0.242  | 119  | 129  |
| IP100306369  | IRNA (cytosine-5)-methyltransferase NSUN2                                                      | LSSETYSQAK              | 27.96              | 1.571  | 597.2593381 | 2 | 0.00172    | 1.44    | 641  | 650  |
| IP100140420  | Staphylococcal nuclease domain-containing protein 1                                            | SEAVVEYVFGSSR           | 88.93              | 2.207  | 755.335693  | 2 | 0.00103    | 0.685   | 527  | 539  |
| IP100927608  | Uncharacterized protein                                                                        | IKQSEQLAVLER            | 201.78             | 2.333  | 562.9414058 | 3 | -0.00196   | -1.16   | 858  | 870  |
| IP100888085  | Isoform 4 of Serrate RNA effector molecule homolog                                             | GEYRDYR                 | 74.63              | 1.408  | 577.2196042 | 2 | -0.000243  | -0.211  | 53   | 60   |
| IP100333010  | Calcium homeostasis endoplasmic reticulum protein 111 kDa protein                              | DKWDQYK                 | 1000               | 1.39   | 531.7187497 | 2 | -0.000252  | -0.237  | 878  | 884  |
| IP101015380  | 111 kDa protein                                                                                | SGSYLYEER               | 30.97              | 2.849  | 635.7533566 | 2 | -0.000338  | -0.266  | 908  | 917  |
| IP100795303  | cDNA FLJ50996, highly similar to 60S ribosomal protein L4                                      | SnyNLPMHK               | 74.96              | 2.727  | 592.2524411 | 2 | -0.000694  | -0.0586 | 283  | 291  |
| IP100294435  | Pre-mRNA-splicing factor SLU7                                                                  | ENPVANAGKNPDEVSYAGDNFVR | 84.65              | 2.698  | 869.7103267 | 3 | 0.0000361  | 0.00138 | 294  | 316  |
| IP100304612  | 60S ribosomal protein L13a                                                                     | KIDKyTEVLK              | 19.53              | 3.39   | 439.5671688 | 3 | -0.000107  | -0.813  | 188  | 197  |
| IP100742900  | mitogen-activated protein kinase 3 isoform 2                                                   | IADPEHDYGLTFEYVATR      | 23.2               | 2.917  | 751.3399044 | 3 | 0.00134    | 0.593   | 190  | 208  |
| IP100930688  | Tubulin alpha-1B chain                                                                         | FDLMyAK                 | 1000               | 1.821  | 404.2038571 | 2 | -0.000237  | -0.245  | 395  | 401  |
| IP101011129  | cDNA FLJ38453, clone FEBRA2019663, highly similar to Homo sapiens DEAD HGDGyRHPFSSSR           | HGDGyRHPFSSSR           | 61.1               | 1.643  | 522.2144161 | 3 | -0.00183   | -1.17   | 557  | 569  |
| IP100246058  | Programmed cell death 6-interacting protein                                                    | KNDYFVDRPDLK            | 1000               | 3.106  | 489.4824214 | 4 | -0.000516  | -0.264  | 313  | 327  |
| IP100909998  | cDNA FLJ151242, moderately similar to Eukaryotic translation initiation factor 2 siVDEKYGyDLSK | siVDEKYGyDLSK           | 49.22              | 1.555  | 492.2451473 | 3 | 0.000653   | 0.0443  | 76   | 87   |
| IP100555572  | Isoform 1 of Apoptosis inhibitor 5                                                             | YSSNLGNFyGER            | 169.11             | 2.234  | 800.8258664 | 2 | 0.000681   | 0.426   | 488  | 500  |
| IP100337387  | Isoform 3 of Pre-mRNA-processing factor 40 homolog A                                           | TyyYNTETK               | 23.98, 61.94       | 2.36   | 671.7363888 | 2 | 0.000395   | 0.294   | 156  | 164  |
| IP1001001414 | PDZ and LIM domain protein 1                                                                   | VTPPEGEVTVFPK           | 21.95              | 1.678  | 871.4270016 | 2 | 0.000652   | 0.374   | 315  | 329  |
| IP100654698  | Isoform 2 of Polyglutamine-binding protein 1                                                   | GyDKVDR                 | 1000               | 2.07   | 466.6977231 | 2 | -0.000405  | -0.435  | 145  | 151  |
| IP100654698  | Isoform 2 of Polyglutamine-binding protein 1                                                   | ERGyDKVDR               | 1000               | 1.97   | 405.153804  | 3 | -0.00124   | -1.01   | 143  | 151  |
| IP100965722  | cDNA FLJ52361, highly similar to T-complex protein 1 subunit epsilon                           | HKLDVTSVEDYKALQK        | 93.62              | 2.789  | 489.2457276 | 4 | -0.00229   | -1.17   | 209  | 224  |
| IP100965722  | cDNA FLJ52361, highly similar to T-complex protein 1 subunit epsilon                           | HKLDVTSVEDYK            | 109.69             | 2.173  | 505.2365108 | 3 | -0.000244  | -0.161  | 209  | 220  |
| IP100645208  | RNA-binding protein FUS isoform 3                                                              | TGQPMINLYDRETKLKL       | 16.25              | 1.9    | 537.0161738 | 4 | -0.000746  | -0.329  | 313  | 330  |
| IP100645208  | RNA-binding protein FUS isoform 3                                                              | APKPDGPGGGGSGHMGyGDDR   | 88.8               | 2.766  | 778.318481  | 3 | -0.00143   | -0.614  | 445  | 468  |
| IP100479469  | Myeloid/lymphoid or mixed-lineage leukemia                                                     | EyFTFPASK               | 70.57              | 1.711  | 585.2499386 | 2 | 0.0000258  | 0.022   | 1229 | 1237 |
| IP100025273  | Isoform Long of Trifunctional purine biosynthetic protein adenosine-3                          | GYPGDYTK                | 23.98              | 1.505  | 490.6921078 | 2 | -0.000436  | -0.445  | 343  | 350  |
| IP100827541  | Isoform 2 of RNA-binding protein 26                                                            | DyDRNPPRR               | 1000               | 1.811  | 423.5226436 | 3 | -0.00155   | -1.22   | 154  | 162  |
| IP100465100  | Isoform 2 of Zinc finger protein 574                                                           | YHHTGEYPK               | 78.53              | 2.281  | 458.8555904 | 3 | -0.000905  | -0.659  | 689  | 698  |
| IP100256605  | Isoform 1 of WW domain-containing adapter protein with coiled-coil                             | KYyNcR                  | 30.97, 27.96       | 1.307  | 613.7095334 | 2 | 0.000618   | 0.504   | 145  | 151  |
| IP100017630  | Nuclear fragile X mental retardation-interacting protein 1                                     | KDyHNyQLTFEPR           | 139.97, 137.37     | 2.777  | 624.2556799 | 3 | 0.000296   | 0.158   | 436  | 448  |
| IP100878075  | 23 kDa protein                                                                                 | ICANHyTPEMLKPMAGSDR     | 41.47              | 4.309  | 833.3729854 | 3 | -0.0000856 | -0.0343 | 98   | 118  |
| IP100909953  | Uncharacterized protein                                                                        | TEyMAFPKPFSSSSSIAEKPR   | 19.69              | 2.49   | 635.5452876 | 4 | -0.000451  | -0.178  | 1175 | 1196 |
| IP100006196  | Isoform 2 of Nuclear mitotic apparatus protein 1                                               | LGSPPYGNALLSGyRPTTR     | 48.63              | 2.754  | 805.7291256 | 3 | 0.0005     | 0.207   | 1846 | 1867 |
| IP100794580  | cDNA FLJ54078, highly similar to Protein arginine N-methyltransferase 5                        | YSQYQYAK                | 93.64              | 1.717  | 686.3038937 | 2 | 0.00134    | 0.574   | 290  | 299  |
| IP100297455  | A-kinase anchor protein 8-like                                                                 | YDyESGDSR               | 52.4               | 2.489  | 681.2218625 | 2 | 0.000208   | 0.153   | 122  | 131  |
| IP100219839  | Isoform 2 of Hypermethylated in cancer 2 protein                                               | cSVEKTYKDPATLR          | 27.96              | 2.768  | 626.6192012 | 3 | 0.0021     | 1.1     | 489  | 503  |
| IP100002220  | histone deacetylase complex subunit SAP130 isoform a                                           | AyHFFQR                 | 1000               | 2.375  | 555.2379147 | 2 | -0.000122  | -0.11   | 944  | 951  |
| IP100022790  | Microfibrillar-associated protein 1                                                            | FLQKyHR                 | 1,000.00, 1,000.00 | 1.565  | 438.829049  | 3 | -0.000693  | -0.528  | 337  | 344  |
| IP101010680  | Putative uncharacterized protein DKFZp686A1782                                                 | MKEFYQANyAR             | 1000               | 2.159  | 489.543182  | 3 | -0.000307  | -0.0209 | 448  | 458  |
| IP100020898  | Ribosomal protein S6 kinase alpha-3                                                            | GAMAATYSALNR            | 30.97              | 1.784  | 653.2875363 | 2 | 0.00102    | 0.782   | 701  | 712  |
| IP100013415  | 40S ribosomal protein S7                                                                       | VETFSyYK                | 50.19              | 2.384  | 555.2497555 | 2 | -0.00034   | -0.307  | 170  | 178  |
| IP100013415  | 40S ribosomal protein S7                                                                       | VETFSyYK                | 50.19              | 2.033  | 619.297902  | 2 | 0.000729   | 0.589   | 170  | 179  |
| IP100027988  | Transcriptional repressor CTCF                                                                 | FkDQyDyAR               | 1000               | 2.047  | 534.856567  | 3 | -0.000172  | -0.107  | 495  | 505  |
| IP100027988  | Transcriptional repressor CTCF                                                                 | cDQDyAR                 | 1000               | 2.014  | 664.1993405 | 2 | 0.0000336  | 0.0253  | 497  | 505  |
| IP100983590  | origin recognition complex subunit 3 isoform 3                                                 | IAlHTALNNyYLYK          | 20.98              | 3.475  | 625.313232  | 3 | -0.00138   | -0.737  | 454  | 468  |
| IP100297121  | UPF0549 protein C20orf43                                                                       | SIADSESEAYK             | 79.9               | 4.434  | 704.7805783 | 2 | 0.00121    | 0.856   | 268  | 279  |
| IP100012149  | U3 small nuclear ribonucleoprotein protein MPP10                                               | EKPKEADyEYK             | 1,000.00, 1,000.00 | 2.132  | 563.2397457 | 3 | 0.00123    | 0.728   | 445  | 456  |
| IP100218697  | Isoform 2 of Protein 4.1                                                                       | ERLDGENyLR              | 1000               | 2.381  | 486.5647579 | 2 | -0.000503  | -0.345  | 619  | 629  |
| IP100306446  | Isoform 1 of Zinc finger protein 24                                                            | IHSGEKPyGVEGK           | 83.01              | 2.223  | 600.9202877 | 3 | -0.000442  | -0.0245 | 272  | 286  |
| IP100334400  | Isoform 2 of Plakophilin-4                                                                     | STTNyVDFYTK             | 60.18              | 1.396  | 753.3136594 | 2 | -0.000633  | -0.42   | 1121 | 1132 |
| IP100014474  | A-kinase anchor protein 8                                                                      | NGSFGQySEKDPAR          | 27.96              | 2.298  | 627.5845333 | 3 | -0.000842  | -0.448  | 163  | 178  |
| IP100554560  | Protein C16orf88                                                                               | IfyIDR                  | 1000               | 1.436  | 453.7100827 | 2 | -0.000386  | -0.426  | 443  | 448  |
| IP100745955  | Probable rRNA-processing protein EBP2                                                          | ESyDVSFR                | 30.97              | 2.479  | 642.7432248 | 2 | 0.000098   | 0.0763  | 263  | 272  |
| IP100170596  | Paired amphipathic helix protein Sin3a                                                         | TQyEHTYR                | 43.97              | 1.948  | 440.1875911 | 3 | 0.000197   | 0.149   | 603  | 611  |
| IP100025176  | Survival of motor neuron-related-splicing factor 30                                            | VGVGTGAIADKPMQyQDTSK    | 0                  | 5.585  | 779.3477169 | 3 | -0.00329   | -1.41   | 209  | 229  |
| IP100966856  | Isoform 2 of Dual specificity protein kinase CLK1                                              | SINEKDYHSRR             | 39.54              | 2.077  | 495.559753  | 3 | -0.00112   | -0.753  | 61   | 71   |
| IP100015973  | Band 4.1-like protein 2                                                                        | VEGDNyLR                | 1000               | 1.728  | 572.755676  | 2 | -0.0005    | -0.437  | 617  | 625  |
| IP100220336  | Isoform 2 of Exosome component 10                                                              | LYNVDNKNyQLADWR         | 63.33              | 3.145  | 751.6646724 | 3 | -0.00172   | -0.765  | 409  | 425  |
| IP100438287  | Isoform 2 of Protein LAP2                                                                      | RAQIPEGyDLYSR           | 43.97              | 2.371  | 549.9219356 | 2 | -0.00317   | -1.92   | 1096 | 1108 |
| IP100218624  | Isoform 1 of Protein SON                                                                       | LAQDPYR                 | 1000               | 1.425  | 471.7077328 | 2 | -0.00109   | -1.15   | 956  | 966  |
| IP101014951  | 163 kDa protein                                                                                | KIDYFER                 | 1000               | 1.491  | 525.7368771 | 2 | -0.000297  | -0.283  | 660  | 662  |
| IP100220885  | Isoform 2 of Death domain-associated protein 6                                                 | KQTGSGLNPyYER           | 24.95              | 3.069  | 558.2617183 | 3 | -0.000222  | -0.132  | 637  | 651  |
| IP100220885  | Isoform 2 of Death domain-associated protein 6                                                 | QTGSGLNPyYER            | 27.96              | 3.456  | 772.8405789 | 2 | -0.0014    | -0.906  | 638  | 651  |
| IP100942141  | Serine/arginine-rich splicing factor 12                                                        | NVADARPEDLRR            | 1000               | 1.458  | 531.587585  | 3 | -0.00762   | -4.79   | 16   | 28   |
| IP100448815  | Isoform 2 of RNA polymerase II-associated protein 3                                            | SYDyEAWK                | 86.98              | 1.84   | 606.7344968 | 2 | -0.000258  | -0.213  | 87   | 92   |
| IP101013471  | cDNA FLJ55916, highly similar to General transcription factor II-1                             | APSYLEISSmR             | 30.97, 1,000.00    | 2.284  | 675.2946164 | 2 | 0.000166   | 0.123   | 912  | 925  |
| IP100029422  | Kinesin-like protein KIF20A                                                                    | TPTQSSSTySPYAR          | 27.96              | 2.919  | 905.8427731 | 2 | -0.000136  | -0.0751 | 857  | 871  |
| IP100029422  | Kinesin-like protein KIF20A                                                                    | AACIAEQyHTVLK           | 36.63              | 2.075  | 528.5820919 | 3 | 0.00123    | 0.779   | 807  | 819  |
| IP100479306  | Proteasome subunit beta type-5                                                                 | DAYSGGAVNLYHVR          | 130.12             | 2.288  | 534.5757442 | 3 | 0.000256   | 0.16    | 226  | 239  |
| IP100290094  | Splicing factor, suppressor of white-apricot homolog                                           | LAyEVAR                 | 1000               | 1.926  | 451.2128598 | 2 | -0.000532  | -0.59   | 463  | 469  |
| IP100744062  |                                                                                                |                         |                    |        |             |   |            |         |      |      |

|             |                                                               |                       |                            |       |             |   |            |          |      |      |
|-------------|---------------------------------------------------------------|-----------------------|----------------------------|-------|-------------|---|------------|----------|------|------|
| IP100386927 | Uncharacterized protein                                       | DHYINYSR              | 57.16, 64.82               | 1.705 | 435.5043026 | 3 | 0.0007     | 0.536    | 210  | 218  |
| IP100980964 | Isoform 4 of Roundabout homolog 1                             | NGLTSTYVAGIR          | 30.97                      | 2.311 | 616.7873532 | 2 | -0.000845  | -0.686   | 887  | 897  |
| IP100939162 | Isoform 2 of Zinc finger protein 589                          | THTGEKPYGEGGR         | 93.15                      | 2.051 | 610.9152217 | 3 | -0.000642  | -0.351   | 266  | 280  |
| IP100939162 | Isoform 2 of Zinc finger protein 589                          | IHTGDKPYVVRD          | 112.98                     | 2.134 | 514.2255245 | 3 | -0.00127   | -0.823   | 350  | 361  |
| IP100796366 | cDNA FLJ35329, highly similar to Myosin light polypeptide 6   | NKDGQYEDYVEGLR        | 64.24                      | 2.3   | 622.9357906 | 3 | 0.000395   | 0.212    | 173  | 187  |
| IP100981816 | Uncharacterized protein                                       | AQLSGQLQCLYK          | 143.16                     | 1.995 | 849.9187619 | 2 | 0.000407   | 0.24     | 125  | 138  |
| IP100796082 | Isoform 5 of Zinc finger protein 64 homolog, isoforms 3 and 4 | TcDYAAADSSLNK         | 88.93                      | 1.874 | 791.8087155 | 2 | -0.0000588 | -0.0542  | 207  | 220  |
| IP100796082 | Isoform 5 of Zinc finger protein 64 homolog, isoforms 3 and 4 | chLDyAAVDDSSLNK       | 236.01                     | 3.589 | 645.2777095 | 3 | -0.00158   | -0.816   | 360  | 375  |
| IP100796082 | Isoform 5 of Zinc finger protein 64 homolog, isoforms 3 and 4 | cQIPYASR              | 0                          | 1.276 | 617.7408444 | 2 | -0.00119   | -0.967   | 233  | 241  |
| IP100328840 | THO complex subunit 4                                         | NRPAYSRPK             | 48.15                      | 2.116 | 422.5435482 | 3 | -0.000632  | -0.499   | 79   | 88   |
| IP100797660 | Zinc finger protein 295 isoform 5                             | NLLYSK                | 26.2                       | 1.624 | 490.728851  | 2 | 0.00045    | 0.459    | 306  | 312  |
| IP100220834 | X-ray repair cross-complementing protein 5                    | QyMFSSLK              | 79.9                       | 1.214 | 542.2326047 | 2 | -0.00124   | -1.15    | 432  | 439  |
| IP100299413 | GA-binding protein alpha chain                                | NKPTMNYEK             | 88.93                      | 1.616 | 602.757507  | 2 | -0.000238  | -0.197   | 365  | 373  |
| IP100549924 | Isoform 2 of Alpha-catulin                                    | YGyLSLPPMK            | 27.96                      | 1.756 | 688.8397214 | 2 | 0.00249    | 1.81     | 534  | 544  |
| IP101015033 | Putative uncharacterized protein DKFZp686A2068                | LGEGyGyVYK            | 112.70, 117.47, 135.91.507 |       | 700.2371213 | 2 | 0.00383    | 2.74     | 36   | 46   |
| IP101015033 | Putative uncharacterized protein DKFZp686A2068                | LGEGyGyVYK            | 0.00, 0.00                 | 1.623 | 660.2536008 | 2 | 0.00312    | 2.36     | 36   | 46   |
| IP100641287 | serine/arginine-rich splicing factor 11 isoform 2             | SKIPPKYSSTAR          | 26.20, 27.96               | 2.112 | 494.8849788 | 3 | -0.000272  | -0.183   | 323  | 334  |
| IP100059944 | E3 ubiquitin-protein ligase RNF25                             | TPGSSYPR              | 30.97                      | 2.916 | 472.6977841 | 2 | -0.000183  | -0.194   | 427  | 434  |
| IP100062037 | Dynein light chain 2, cytoplasmic                             | NFGSyVTHETK           | 27.96                      | 1.771 | 681.790405  | 2 | -0.000142  | -0.104   | 61   | 71   |
| IP100747877 | Zinc finger protein 768                                       | AFADSSYLRL            | 30.97                      | 1.689 | 611.7793576 | 2 | -0.000364  | -0.0297  | 325  | 334  |
| IP100016633 | F-box only protein 5                                          | DcIKDYER              | 1000                       | 1.75  | 589.7316281 | 2 | -0.000606  | -0.0515  | 85   | 92   |
| IP100016633 | F-box only protein 5                                          | YDyLQR                | 78.8                       | 1.973 | 549.2102658 | 2 | -0.0000553 | -0.0777  | 387  | 393  |
| IP10010833  | Zinc finger protein 148                                       | DKNDyPLYSSSTK         | 84.46                      | 1.156 | 855.884216  | 2 | -0.00232   | -1.36    | 341  | 354  |
| IP100307591 | Zinc finger protein 609                                       | MWTVVYPAK             | 30.97                      | 1.877 | 619.7698971 | 2 | -0.000157  | -0.127   | 1140 | 1148 |
| IP100307591 | Zinc finger protein 609                                       | AEADKYVFTDNAPSPISGSSR | 24.95                      | 3.327 | 817.3673702 | 3 | -0.00137   | -0.558   | 790  | 812  |
| IP100009146 | TRAF-type zinc finger domain-containing protein 1             | VTPAAAYR              | 156.18                     | 1.895 | 521.740051  | 2 | 0.0000504  | 0.0483   | 551  | 559  |
| IP100307760 | Zinc finger CCH domain-containing protein 8                   | ELQYVQAR              | 1000                       | 1.995 | 614.7900998 | 2 | -0.000452  | -0.368   | 93   | 101  |
| IP100909397 | histone acetyltransferase MYST2 isoform 4                     | NLQSFTEEPAYSTR        | 24.95                      | 2.026 | 890.3840939 | 2 | 0.00124    | 0.695    | 61   | 75   |
| IP100646155 | Isoform 3 of Multiple myeloma tumor-associated protein 2      | EALLAALGyK            | 1000                       | 2.347 | 564.7890011 | 2 | -0.000549  | -0.487   | 76   | 85   |
| IP100788045 | Isoform 6 of Ubiquitin carboxyl-terminal hydrolase 48         | ISHQNYAYQK            | 30.38                      | 1.773 | 482.2258907 | 3 | -0.000604  | -0.418   | 44   | 54   |
| IP100185097 | Isoform 2 of DNA replication complex GINS protein PSF3        | GQASQTASLNQNYK        | 110.85                     | 2.032 | 901.4285275 | 2 | 0.000603   | 0.335    | 114  | 129  |
| IP100853348 | 55 kDa erythrocyte membrane protein isoform 4                 | KSEEDGKEYHFISTEEMTR   | 29.41                      | 3.556 | 599.7573017 | 4 | -0.00659   | -2.75    | 293  | 311  |
| IP100783915 | cDNA FLJ52331, highly similar to Zinc finger protein 570      | VHTGKPYEIECCGK        | 93.15                      | 2.686 | 629.6000362 | 3 | 0.0024     | 1.27     | 120  | 134  |
| IP100100731 | SH2 domain-containing protein 4A                              | SQyHDLQAPDNQYTK       | 23.2                       | 2.827 | 618.2671505 | 3 | -0.00114   | -0.607   | 129  | 143  |
| IP100179465 | Uncharacterized protein                                       | IHTGKPYQCYEYR         | 23.2                       | 2.138 | 737.9716182 | 3 | -0.000252  | -0.114   | 519  | 534  |
| IP100030313 | Isoform 1 of Cyclin-T2                                        | DHYIAAQVEQYQK         | 1000                       | 2.366 | 549.5824581 | 3 | -0.0012    | -0.73    | 454  | 466  |
| IP100978060 | mitogen-activated protein kinase 12-like, partial             | QADSEMTYVTVTR         | 27.96                      | 1.603 | 768.8243405 | 2 | 0.000229   | 0.149    | 80   | 92   |
| IP100983633 | HSPe1-MOBL3 protein                                           | HTLDGAALLNSNKYFSPSR   | 23.2                       | 2.002 | 748.6809688 | 3 | -0.000135  | -0.0603  | 163  | 181  |
| IP100908873 | Isoform 3 of Nucleolar and coiled-body phosphoprotein 1       | NKPGYVSPVPPAPPK       | 18.95                      | 3.578 | 632.908345  | 3 | 0.000527   | 0.278    | 285  | 302  |
| IP100385712 | Transcription termination factor 1                            | LYYR                  | 30.97                      | 1.349 | 404.1938779 | 2 | -0.000696  | -0.862   | 602  | 606  |
| IP100031556 | Isoform 1 of Splicing factor UZAF 65 kDa subunit              | YcDPDSyHR             | 43.29                      | 3.048 | 483.5190731 | 3 | -0.000323  | -0.223   | 463  | 472  |
| IP100221129 | Homeobox protein DLX-1                                        | FQQTQYLALPER          | 27.96                      | 2.167 | 787.3753659 | 2 | 0.00118    | 0.75     | 147  | 158  |
| IP100337565 | Aiolos isoform HAI0-del                                       | EYNEYENIKLER          | 20.2                       | 2.09  | 560.5826412 | 3 | 0.000447   | 0.266    | 58   | 69   |
| IP100026559 | Upstream stimulatory factor 1                                 | TENGGOVYMR            | 133.51                     | 1.836 | 617.7502438 | 2 | -0.000164  | -0.133   | 53   | 62   |
| IP100908950 | Ribosomal protein L18                                         | SQDyLRL               | 152.42                     | 1.88  | 487.7214657 | 2 | 0.00018    | 0.185    | 20   | 26   |
| IP100761043 | Isoform 2 of Nuclear receptor coactivator 7                   | LIEYLYTK              | 26.2                       | 1.74  | 561.778381  | 2 | 0.0000105  | 0.00937  | 511  | 518  |
| IP100007927 | Isoform 1 of Structural maintenance of chromosomes protein 2  | MLKDYDWINAER          | 1000                       | 1.995 | 545.2413326 | 3 | -0.000379  | -0.232   | 934  | 945  |
| IP100790098 | Isoform 1 of Uncharacterized protein C3orf63                  | LLCyLSLR              | 50.64                      | 1.568 | 559.278259  | 2 | 0.000501   | 0.448    | 369  | 376  |
| IP100941101 | Histone-lysine N-methyltransferase SUV39H1                    | EQEYLYK               | 27.96                      | 1.588 | 576.2553708 | 2 | 0.00029    | 0.252    | 56   | 63   |
| IP100657858 | Isoform 1 of Shugoshin-like 2                                 | CTPFYKPELSR           | 79.09                      | 2.031 | 542.2464595 | 3 | 0.000137   | 0.0842   | 1249 | 1260 |
| IP100941780 | Isoform 3 of Zinc finger protein 40                           | SNEEYVYVR             | 60.18                      | 1.722 | 619.7586056 | 2 | 0.000597   | 0.0482   | 71   | 79   |
| IP100974250 | Uncharacterized protein                                       | KATVYVQAPLEKPR        | 0                          | 3.198 | 581.9663082 | 3 | -0.000352  | -0.202   | 130  | 143  |
| IP100847837 | Protein                                                       | AALAAQYK              | 1000                       | 1.887 | 493.7396237 | 2 | 0.000196   | 0.199    | 173  | 181  |
| IP100013724 | Isoform A of Protein ATP1B4                                   | RAPSPFYSYR            | 49.9                       | 1.082 | 662.2902829 | 2 | -0.0159    | -1.2     | 9    | 18   |
| IP100023467 | RNA polymerase II elongation factor ELL                       | GQILQYER              | 1000                       | 1.894 | 543.7533566 | 2 | 0.000262   | 0.241    | 572  | 579  |
| IP100399306 | Uncharacterized protein                                       | HQTYLHQAQK            | 43.29                      | 2.668 | 477.9100338 | 3 | -0.000675  | -0.472   | 423  | 433  |
| IP100871780 | RNA-binding protein 12B                                       | AENPYLFLR             | 1000                       | 1.852 | 601.7846677 | 2 | 0.000384   | 0.319    | 152  | 161  |
| IP100002902 | Polynucleotide 5'-hydroxyl-kinase NOL9                        | NNYENYDVIK            | 105.08                     | 1.748 | 732.8247067 | 2 | 0.000362   | 0.247    | 381  | 391  |
| IP100219153 | 60S ribosomal protein L22                                     | ESyELR                | 30.97                      | 1.537 | 438.6787717 | 2 | -0.000708  | -0.808   | 108  | 113  |
| IP100927404 | Protein                                                       | YDyYHER               | 95.84                      | 2.311 | 405.4804988 | 3 | -0.00098   | -0.807   | 99   | 106  |
| IP100030408 | Isoform 1 of M-phase phosphoprotein 8                         | NGDyTVK               | 48.15                      | 1.978 | 495.2212216 | 2 | -0.0000833 | -0.00842 | 576  | 583  |
| IP100000757 | Zinc finger protein SNA11                                     | YnWEyLSLGALK          | 83.7                       | 2.967 | 546.9249874 | 3 | -0.00108   | -0.659   | 158  | 170  |
| IP100022215 | Activity-dependent neuroprotector homeobox protein            | GHEDDSyEARK           | 50.64                      | 2.553 | 462.8488155 | 3 | -0.00203   | -1.46    | 758  | 768  |
| IP100395568 | Isoform 1 of PHD finger protein 6                             | EKPSQGYMVGyR          | 46.51                      | 2.271 | 570.9182125 | 3 | 0.000396   | 0.231    | 117  | 129  |
| IP100294742 | Isoform 1 of La-related protein 7                             | cGNVYyISIPHYK         | 70.16                      | 1.995 | 543.9221798 | 3 | 0.000797   | 0.489    | 148  | 160  |
| IP100166153 | Cap-specific mRNA (nucleoside-2'-O-)-methyltransferase 1      | YSMyNSVQK             | 60.18                      | 2.079 | 643.7602536 | 2 | -0.000444  | -0.0345  | 84   | 93   |
| IP100400922 | Protein RRP5 homolog                                          | AFENTLSYTK            | 30.97                      | 2.26  | 732.3447262 | 2 | -0.000799  | -0.546   | 1782 | 1793 |
| IP100306871 | Isoform 1 of Histone acetyltransferase KAT2A                  | ELKDPDQLYTLK          | 20.98                      | 1.773 | 548.6029659 | 3 | -0.000479  | -0.291   | 726  | 738  |
| IP100007306 | Isoform 1 of Craniofacial development protein 1               | GKEGYIER              | 1000                       | 2.037 | 516.2321164 | 2 | -0.000188  | -0.0182  | 267  | 274  |
| IP100329216 | Isoform 1 of DNA (cytosine-5)-methyltransferase 3A            | LTFQAGDPYVSKR         | 27.96                      | 2.983 | 580.278564  | 3 | -0.000584  | -0.394   | 188  | 201  |
| IP100004859 | Bloom syndrome protein                                        | AQLYTTNVK             | 27.96                      | 1.895 | 609.7915646 | 2 | -0.00192   | -1.58    | 196  | 205  |
| IP100062814 | UPFD684 protein CSor30                                        | SLDyLNLDK             | 93.05                      | 1.604 | 580.7659909 | 2 | -0.000698  | -0.0601  | 167  | 175  |
| IP100305374 | Isoform 1 of THO complex subunit 1                            | ILAPyLEMK             | 1000                       | 1.528 | 579.2882077 | 2 | 0.000264   | 0.228    | 587  | 595  |
| IP100045207 | Nucleus accumbens-associated protein 1                        | AEDDyVTFISETGK        | 30.97                      | 3.138 | 864.3558957 | 2 | -0.00156   | -0.903   | 484  | 498  |
| IP100413860 | Isoform 2 of Spermatid perinuclear RNA-binding protein        | LSAFQYK               | 156.18                     | 1.132 | 553.767822  | 2 | -0.00101   | -0.911   | 302  | 310  |
| IP100787106 | Zinc finger SWIM domain-containing protein 6                  | IYyWSFPR              | 86.89                      | 1.957 | 574.271423  | 2 | 0.000895   | 0.779    | 109  | 116  |
| IP100017341 | SF3A2 protein (Fragment)                                      | FMSyEQK               | 60.18                      | 1.716 | 556.2178342 | 2 | -0.000483  | -0.435   | 151  | 158  |
| IP100218606 | 40S ribosomal protein S23                                     | WHDKQyK               | 1000                       | 1.48  | 542.7346799 | 2 | -0.000292  | -0.269   | 22   | 28   |
| IP100749512 | Ribosomal protein S10 variant (Fragment)                      | GEARDTyRR             | 0                          | 2.495 | 440.1900936 | 3 | 0.000404   | 0.307    | 129  | 138  |
| IP100878011 | Protein                                                       | LSGLAAPDyTR           | 0                          | 2.612 | 622.290466  | 2 | 0.00058    | 0.467    | 550  | 560  |
| IP100964344 | Ephrin receptor                                               | VLEDDPEAAyVTR         | 0                          | 1.508 | 780.3366086 | 2 | 0.00217    | 1.39     | 825  | 837  |
| IP100926927 | Protein                                                       | HSSGQNLNTTYETLK       | 18.95                      | 3.157 | 671.9812008 | 3 | -0.000474  | -0.236   | 218  | 234  |
| IP100909623 | cDNA FLJ53072, highly similar to Calponin-3                   | cASQAGMTyGTRR         | 17.99                      | 3.641 | 537.2255245 | 2 | -0.000768  | -0.477   | 127  | 140  |
| IP100375358 | Isoform 1 of Replication factor C subunit 1                   | KEESyKEEPAVSK         | 0                          | 3.096 | 601.9526973 | 3 | 0.000615   | 0.341    | 325  | 339  |
| IP100941031 | cDNA FLJ12599 fs, clone NT2RM4001410                          | AEQQDSGRyLLEK         | 12.07                      | 1.935 | 577.5964351 | 2 | -0.00157   | -0.908   | 261  | 274  |
| IP100303207 | ATP-binding cassette sub-family E member 1                    | KSGNyFLDD             | 17.78                      | 2.194 | 643.2612302 | 2 | 0.000309   | 0.24     | 590  | 599  |
| IP100147874 | Sialic acid synthase                                          | KALERPYISK            | 0                          | 1.759 | 424.8835445 | 3 | -0.000443  | -0.348   | 65   | 74   |
| IP100306749 | Kanadaplin                                                    | TTSLcAGPSAKNKyEK      | 19.22                      | 3.382 | 641.6124874 | 3 | 0.00102    | 0.531    | 726  | 742  |
